# Supplementary material
Source: publisher figshare collection journal article supplement (https://acs.figshare.com/ndownloader/files/9493300)
Supplement: Supplementary file 1 [file 9493300]

## Sheet: 10_116971 _ HATS
FOR SORTING	peptide#	635-spot1	635-spot2	635-spot3	635-Avg Total Signal Array1 well1	635-Std Array 1 well1	635-Log2 Array1 well1	635-Norm Array 1 well1 (w/in well)	635-Norm Array 1 well1 (w/in array)	635-spot1	635-spot2	635-spot3	635-Avg Total Signal Array1 well2	635-Std Array 1 well2	635-Log2 Array 1 well2	635-Norm Array 1 well2 (w/in well)	635-Norm Array 1 well2 (w/in array)	W2/W1	Log2 (W2/W1)	Norm w/in well W2/W1	Log2(Norm w/in well W2/W1)	Norm w/in array W2/W1	Log2(Norm w/in array W2/W1)		Block	Numbering	#	Sequence		Mod1	Mod2	Mod3	Mod4	Mod5
1	1	169857	168099	167938	168631	1064.51	17.3635	0.00186101	0.00185164	188853	177265	179201	181773	6207.4	17.4718	0.0017378	0.00221073	1.07793	0.108265	0.933795	-0.0988218	1.19393	0.255721		1	1	1	A R T K Q T A R K S T G G	H3 1-13
2	2	244655	250914	259433	251667	7417.75	17.9412	0.00414142	0.00412058	266559	258750	265519	263609	4240.31	18.008	0.00397501	0.00444689	1.04745	0.0668835	0.959819	-0.0591657	1.07919	0.10995		1	2	2	A Rme T K Q T A R K S T G G	H3 1-13	H3R2me1
3	3	215938	216514	199828	210760	9471.77	17.6852	0.00301799	0.00300279	226287	225849	223103	225080	1725.8	17.7801	0.0029217	0.00339408	1.06794	0.0948346	0.968097	-0.0467759	1.13031	0.176713		1	3	3	A Rme2s T K Q T A R K S T G G	H3 1-13	H3R2me2s
4	4	206891	188248	192128	195756	9836.68	17.5787	0.00260592	0.00259281	206771	204624	199393	203596	3794.91	17.6353	0.00233439	0.00280704	1.04005	0.0566551	0.895802	-0.158748	1.08263	0.114536		1	4	4	A Rme2a T K Q T A R K S T G G	H3 1-13	H3R2me2a
5	5	156963	162370	191387	170240	18512.3	17.3772	0.00190519	0.0018956	195091	185155	181886	187377	6877.29	17.5156	0.00189101	0.00236387	1.10067	0.138376	0.992559	-0.0107755	1.24703	0.318498		1	5	5	A Rcit T K Q T A R K S T G G	H3 1-13	H3R2cit
6	6	283735	297593	285781	289036	7480.57	18.1409	0.00516768	0.00514167	290935	299564	294716	295072	4325.48	18.1707	0.00483512	0.00530659	1.02088	0.0298145	0.935646	-0.0959657	1.03207	0.0455463		1	6	6	A R Tph K Q T A R K S T G G	H3 1-13	H3T3ph
7	7	138573	148683	139302	142186	5638.36	17.1174	0.00113474	0.00112903	162937	177681	156953	165857	10668.1	17.3396	0.00130269	0.00177583	1.16648	0.22216	1.14801	0.199135	1.57288	0.653412		1	7	7	A R T Kme Q T A R K S T G G	H3 1-13	H3K4me1
8	8	131660	133115	131169	131981	1012.01	17.01	0.000854491	0.00085019	149320	152492	132426	144746	10786.7	17.1432	0.000725569	0.00119898	1.09672	0.13319	0.849124	-0.235953	1.41025	0.495951		1	8	8	A R T Kme2 Q T A R K S T G G	H3 1-13	H3K4me2
9	9	128627	134102	117115	126615	8670.45	16.9501	0.000707107	0.000703548	154313	145894	150463	150223	4214.61	17.1967	0.000875306	0.00134865	1.18646	0.246664	1.23787	0.30786	1.91692	0.938794		1	9	9	A R T Kme3 Q T A R K S T G G	H3 1-13	H3K4me3
10	10	378319	399401	436603	404774	29511.2	18.6268	0.00834619	0.00830418	434604	388221	409042	410622	23231.8	18.6475	0.00799401	0.00846398	1.01445	0.0206943	0.957803	-0.062199	1.01924	0.0274976		1	10	10	A R T Kac Q T A R K S T G G	H3 1-13	H3K4ac
11	11	175708	180848	173852	176803	3624.19	17.4318	0.00208542	0.00207492	177106	180416	180930	179484	2075.38	17.4535	0.00167522	0.00214819	1.01517	0.0217152	0.803304	-0.315981	1.03531	0.0500636		1	11	11	A R T K Q Tph A R K S T G G	H3 1-13	H3T6ph
12	12	131039	130610	131989	131213	705.713	17.0015	0.000833381	0.000829187	142826	138448	132847	138040	5001.98	17.0747	0.000542252	0.00101575	1.05204	0.0731829	0.650665	-0.620014	1.225	0.292778		1	12	12	A R T K Q T A Rme K S T G G	H3 1-13	H3R8me1
13	13	156601	157477	144096	152725	7485.47	17.2206	0.00142416	0.001417	152886	149926	183081	161964	18347.4	17.3053	0.00119628	0.00166947	1.0605	0.0847431	0.839986	-0.251563	1.17817	0.236552		1	13	13	A R T K Q T A Rme2a K S T G G	H3 1-13	H3R8me2a
14	14	109012	110050	107762	108941	1145.64	16.7332	0.000221745	0.000220629	328874	139117	136593	201528	110292	17.6206	0.00227786	0.00275053	1.84988	0.887429	10.2724	3.3607	12.4668	3.64002		1	14	14	A R T K Q T A Rme2s K S T G G	H3 1-13	H3R8me2s
15	15	144307	144782	141079	143389	2014.85	17.1296	0.00116779	0.00116191	156960	158008	158078	157682	626.249	17.2667	0.00107921	0.00155245	1.09968	0.13708	0.924148	-0.113805	1.33612	0.418051		1	15	15	A R T K Q T A Rcit K S T G G	H3 1-13	H3R8cit
16	16	154630	155234	155143	155002	325.644	17.2419	0.00148672	0.00147923	161731	167570	171045	166782	4706.74	17.3476	0.00132798	0.00180111	1.076	0.105674	0.893232	-0.162893	1.2176	0.284036		1	16	16	A R T K Q T A R Kme S T G G	H3 1-13	H3K9me1
17	17	124701	128416	129007	127375	2334.24	16.9587	0.000727979	0.000724314	140852	136727	154902	144160	9528.46	17.1373	0.000709558	0.00118298	1.13178	0.178596	0.974697	-0.036975	1.63324	0.707735		1	17	17	A R T K Q T A R Kme2 S T G G	H3 1-13	H3K9me2
18	18	141630	129358	134435	135141	6166.39	17.0441	0.000941265	0.000936527	178696	165606	155924	166742	11428.4	17.3473	0.00132689	0.00180002	1.23384	0.303152	1.40969	0.495374	1.92201	0.942616		1	18	18	A R T K Q T A R Kme3 S T G G	H3 1-13	H3K9me3
19	19	254402	174862	183187	204150	43717.8	17.6393	0.00283646	0.00282219	212315	218747	225775	218946	6732.2	17.7402	0.00275401	0.00322647	1.07247	0.100941	0.970932	-0.0425576	1.14325	0.193141		1	19	19	A R T K Q T A R Kac S T G G	H3 1-13	H3K9ac
20	20	180269	179015	183477	180920	2301.2	17.465	0.0021985	0.00218743	187089	196045	207176	196770	10063.1	17.5862	0.00214778	0.00262052	1.08761	0.121156	0.976931	-0.0336711	1.19799	0.260614		1	20	20	A R T K Q T A R K Sph T G G	H3 1-13	H3S10ph
21	21	167592	171562	163165	167440	4200.57	17.3533	0.00182828	0.00181908	160205	176549	185731	174162	12929.4	17.4101	0.00152972	0.00200276	1.04015	0.0567858	0.836701	-0.257216	1.10097	0.138778		1	21	21	A Rme T Kme Q T A R K S T G G	H3 1-13	H3R2me1	H3K4me1
22	22	155921	149769	167140	157610	8807.81	17.266	0.00155833	0.00155049	174710	188914	168688	177437	10385.2	17.437	0.00161927	0.00209226	1.1258	0.170951	1.03911	0.0553461	1.34942	0.432343		1	22	22	A Rme T Kme2 Q T A R K S T G G	H3 1-13	H3R2me1	H3K4me2
23	23	113161	108805	107839	109935	2835.24	16.7463	0.000249034	0.000247781	134960	133399	134933	134431	893.552	17.0365	0.000443572	0.000917118	1.22282	0.290212	1.78117	0.832825	3.70133	1.88804		1	23	23	A Rme T Kme3 Q T A R K S T G G	H3 1-13	H3R2me1	H3K4me3
24	24	380516	441088	471039	430881	46116.6	18.7169	0.00906316	0.00901754	464884	476321	446753	462653	14909.8	18.8196	0.00941639	0.00988569	1.07374	0.10264	1.03898	0.0551612	1.09627	0.132608		1	24	24	A Rme T Kac Q T A R K S T G G	H3 1-13	H3R2me1	H3K4ac
25	25	129464	124615	129502	127860	2810.61	16.9642	0.000741316	0.000737585	137841	131835	141235	136970	4760.1	17.0635	0.000513	0.000986513	1.07125	0.0992947	0.692013	-0.53113	1.33749	0.419529		1	25	25	A Rme2a T Kme Q T A R K S T G G	H3 1-13	H3R2me2a	H3K4me1
26	26	128241	121310	115228	121593	6511.11	16.8917	0.000569197	0.000566332	135022	140932	142588	139514	3977.33	17.0901	0.000582538	0.00105602	1.14739	0.19835	1.02344	0.0334248	1.86466	0.898915		1	26	26	A Rme2a T Kme2 Q T A R K S T G G	H3 1-13	H3R2me2a	H3K4me2
27	27	118042	115096	111186	114775	3439.28	16.8084	0.000381945	0.000380023	138398	132173	139496	136689	3949.32	17.0605	0.000505309	0.000978826	1.19093	0.252093	1.32299	0.4038	2.5757	1.36497		1	27	27	A Rme2a T Kme3 Q T A R K S T G G	H3 1-13	H3R2me2a	H3K4me3
28	28	246967	247500	277482	257316	17466	17.9732	0.00429656	0.00427493	347481	355063	330697	344414	12469.2	18.3938	0.00618402	0.00665484	1.33848	0.420599	1.4393	0.525362	1.55671	0.638503		1	28	28	A Rme2a T Kac Q T A R K S T G G	H3 1-13	H3R2me2a	H3K4ac
29	29	128794	130849	130762	130135	1162.15	16.9896	0.000803785	0.00079974	142587	147864	149311	146587	3539.13	17.1614	0.000775907	0.0012493	1.12643	0.171751	0.965316	-0.0509273	1.56213	0.643512		1	29	29	A Rme2s T Kme Q T A R K S T G G	H3 1-13	H3R2me2s	H3K4me1
30	30	125074	130813	129079	128322	2943.44	16.9694	0.000753995	0.0007502	142692	143898	144971	143854	1140.15	17.1342	0.000701175	0.0011746	1.12104	0.164833	0.929946	-0.104781	1.56571	0.64682		1	30	30	A Rme2s T Kme2 Q T A R K S T G	H3 1-13	H3R2me2s	H3K4me2
31	31	146416	126364	131750	134843	10377.7	17.0409	0.00093309	0.000928394	164954	154322	153678	157651	6332.49	17.2664	0.00107837	0.00155162	1.16914	0.225453	1.1557	0.208765	1.67129	0.740963		1	31	31	A Rme2s T Kme3 Q T A R K S T G G	H3 1-13	H3R2me2s	H3K4me3
32	32	688914	535877	471295	565362	111766	19.1088	0.0127564	0.0126922	733509	712094	733513	726372	12365.1	19.4703	0.0166259	0.0170917	1.28479	0.361534	1.30334	0.382208	1.34663	0.429358		1	32	32	A Rme2s T Kac Q T A R K S T G G	H3 1-13	H3R2me2s	H3K4ac
33	33	112281	113266	117731	114426	2904.28	16.8041	0.00037237	0.000370496	136815	138936	136023	137258	1506.18	17.0665	0.000520865	0.000994374	1.19954	0.262475	1.39878	0.484171	2.6839	1.42433		1	33	33	A Rcit T Kme Q T A R K S T G G	H3 1-13	H3R2cit	H3K4me1
34	34	116264	124856	115228	118783	5285.11	16.858	0.000492017	0.00048954	133698	133124	138912	135245	3188.94	17.0452	0.000465825	0.00093936	1.13859	0.187247	0.946766	-0.078921	1.91886	0.94025		1	34	34	A Rcit T Kme2 Q T A R K S T G G	H3 1-13	H3R2cit	H3K4me2
35	35	140726	145841	126213	137593	10182.1	17.0701	0.00100861	0.00100354	167051	170111	293012	210058	71856.6	17.6804	0.00251105	0.00298361	1.52666	0.610377	2.4896	1.31592	2.9731	1.57197		1	35	35	A Rcit T Kme3 Q T A R K S T G G	H3 1-13	H3R2cit	H3K4me3
36	36	164871	170278	173767	169639	4482.33	17.3721	0.00188867	0.00187917	296361	224991	239483	253612	37724.4	17.9523	0.0037017	0.0041737	1.49501	0.580156	1.95995	0.970816	2.22104	1.15124		1	36	36	A Rcit T Kac Q T A R K S T G G	H3 1-13	H3R2cit	H3K4ac
37	37	142556	136358	126445	135120	8126.57	17.0439	0.000940679	0.000935944	154008	147632	159790	153810	6081.42	17.2308	0.000973358	0.00144665	1.13832	0.186912	1.03474	0.0492672	1.54566	0.628224		1	37	37	A Rme Tph K Q T A R K S T G G	H3 1-13	H3R2me1	H3T3ph
38	38	130454	131175	132997	131542	1310.62	17.0052	0.000842426	0.000838186	149139	157880	157905	154975	5053.85	17.2417	0.0010052	0.00147848	1.17814	0.236509	1.19322	0.254856	1.7639	0.81877		1	38	38	A Rme2s Tph K Q T A R K S T G G	H3 1-13	H3R2me2s	H3T3ph
39	39	139092	144283	141238	141538	2608.44	17.1108	0.00111694	0.00111131	160065	159910	155802	158592	2417.74	17.275	0.0011041	0.00157733	1.1205	0.164137	0.988503	-0.0166821	1.41934	0.505216		1	39	39	A Rme2a Tph K Q T A R K S T G G	H3 1-13	H3R2me2a	H3T3ph
40	40	105029	111783	103268	106693	4494.86	16.7031	0.000160008	0.000159203	126060	137363	214980	159468	48406.1	17.2829	0.00112802	0.00160125	1.49464	0.579794	7.04979	2.81758	10.0579	3.33026		1	40	40	A Rcit Tph K Q T A R K S T G G	H3 1-13	H3R2cit	H3T3ph
41	41	108047	104438	105128	105871	1915.79	16.6919	0.000137425	0.000136733	124382	123921	126438	124914	1340.08	16.9306	0.000183399	0.000657068	1.17987	0.238624	1.33454	0.416348	4.80549	2.26468		1	41	41	A Rme T K Q Tph A R K S T G G	H3 1-13	H3R2me1	H3T6ph
42	42	106466	105639	108089	106731	1246.37	16.7036	0.000161052	0.000160241	127819	133048	133301	131389	3094.59	17.0035	0.000360429	0.000834014	1.23103	0.299864	2.23797	1.16219	5.20474	2.37983		1	42	42	A Rme2s T K Q Tph A R K S T G G	H3 1-13	H3R2me2s	H3T6ph
43	43	127443	135909	140887	134746	6796.99	17.0399	0.000930426	0.000925743	165203	162191	148399	158598	8959.78	17.275	0.00110424	0.00157747	1.17701	0.235126	1.18681	0.247092	1.70401	0.768932		1	43	43	A Rme2a T K Q Tph A R K S T G G	H3 1-13	H3R2me2a	H3T6ph
44	44	145376	124580	125459	131805	11761	17.008	0.000849649	0.000845372	159150	145888	146807	150615	7405.8	17.2005	0.000886014	0.00135935	1.14271	0.19246	1.0428	0.0604627	1.60799	0.685259		1	44	44	A Rcit T K Q Tph A R K S T G G	H3 1-13	H3R2cit	H3T6ph
45	45	192441	183785	150413	175546	22192.2	17.4215	0.00205091	0.00204059	206607	149329	148869	168268	33203.1	17.3604	0.00136861	0.00184172	0.958541	-0.0610882	0.667319	-0.583551	0.902543	-0.147932		1	45	45	A R Tph Kme Q T A R K S T G G	H3 1-13	H3T3ph	H3K4me1
46	46	120144	121849	120993	120995	852.502	16.8846	0.000552783	0.000550001	145190	144587	185649	158475	23535	17.2739	0.0011009	0.00157413	1.30976	0.389307	1.99155	0.993893	2.86205	1.51705		1	46	46	A R Tph Kme2 Q T A R K S T G G	H3 1-13	H3T3ph	H3K4me2
47	47	113488	111855	113663	113002	997.178	16.786	0.000333263	0.000331585	137372	137726	149372	141490	6828.31	17.1103	0.000636558	0.00111001	1.2521	0.324352	1.91008	0.93363	3.34759	1.74312		1	47	47	A R Tph Kme3 Q T A R K S T G G	H3 1-13	H3T3ph	H3K4me3
48	48	795202	934037	969545	899595	92133.5	19.7789	0.0219354	0.021825	853809	989967	839593	894456	83019.5	19.7707	0.0212209	0.0216846	0.994288	-0.00826406	0.967426	-0.0477762	0.993567	-0.00931105		1	48	48	A R Tph Kac Q T A R K S T G G	H3 1-13	H3T3ph	H3K4ac
49	49	456629	158070	160088	258262	171794	17.9785	0.00432254	0.00430078	194390	231323	197803	207839	20409.5	17.6651	0.00245038	0.00292297	0.804758	-0.313373	0.566883	-0.818876	0.679637	-0.557164		1	49	49	A R T Kme Q Tph A R K S T G G	H3 1-13	H3K4me1	H3T6ph
50	50	160053	154771	164840	159888	5036.53	17.2867	0.00162089	0.00161273	193741	180035	184885	186220	6949.89	17.5067	0.00185938	0.00233226	1.16469	0.219949	1.14714	0.198035	1.44615	0.532219		1	50	50	A R T Kme2 Q Tph A R K S T G G	H3 1-13	H3K4me2	H3T6ph
51	51	143005	145139	146938	145027	1968.88	17.146	0.00121277	0.00120667	209663	207099	192569	203110	9218.64	17.6319	0.00232111	0.00279377	1.4005	0.485939	1.91389	0.936508	2.31528	1.21118		1	51	51	A R T Kme3 Q Tph A R K S T G G	H3 1-13	H3K4me3	H3T6ph
52	52	274568	298068	304645	292427	15812.1	18.1577	0.0052608	0.00523432	358323	355752	362555	358877	3435.13	18.4531	0.0065794	0.00705004	1.22724	0.295412	1.25065	0.322674	1.34689	0.429629		1	52	52	A R T Kac Q Tph A R K S T G G	H3 1-13	H3K4ac	H3T6ph
53	53	146386	200711	151468	166188	30005.3	17.3425	0.00179392	0.00178489	171887	170676	163864	168809	4325.09	17.365	0.0013834	0.0018565	1.01577	0.0225727	0.771159	-0.374899	1.04012	0.0567494		1	53	53	A R T K Q Tph A Rme K S T G G	H3 1-13	H3T6ph	H3R8me1
54	54	138128	150757	144541	144475	6314.76	17.1405	0.00119761	0.00119159	188870	184375	221498	198248	20260.4	17.5969	0.00218818	0.0026609	1.37219	0.456481	1.82712	0.869569	2.23307	1.15903		1	54	54	A R T K Q Tph A Rme2a K S T G G	H3 1-13	H3T6ph	H3R8me2a
55	925	109847	109327	113396	110857	2214.44	16.7583	0.000274346	0.000272965	129498	171898	218937	173444	44739.5	17.4041	0.00151011	0.00198315	1.56458	0.645777	5.50442	2.46059	7.26524	2.86101		1	55	925	10% K G K G K G K G K G K G K	NEGCTRL-1
56	926	1222218	1214286	1421997	1286167	117699	20.2946	0.0325518	0.032388	1774009	1681455	1746193	1.73389e+06	47488.6	20.7256	0.0441689	0.0446218	1.3481	0.430931	1.35688	0.440293	1.37773	0.462289		1	56	926	10% Kac G Kac G Kac G Kac G Kac G Kac G Kac	POSCTRL-1
57	55	107598	128446	110357	115467	11324.5	16.8171	0.000400959	0.000398941	344252	132022	131271	202515	122748	17.6277	0.00230484	0.0027775	1.75388	0.810548	5.74831	2.52314	6.96219	2.79954		2	57	55	A R T K Q Tph A Rme2s K S T G G	H3 1-13	H3T6ph	H3R8me2s
58	56	111660	115832	121609	116367	4996.03	16.8283	0.000425676	0.000423533	133235	133742	135640	134206	1267.77	17.0341	0.000437421	0.00091097	1.1533	0.205764	1.02759	0.0392675	2.15088	1.10493		2	58	56	A R T K Q Tph A Rcit K S T G G	H3 1-13	H3T6ph	H3R8cit
59	57	120432	121316	127861	123203	4058.09	16.9107	0.000613412	0.000610325	138926	135274	135874	136691	1958.39	17.0606	0.000505373	0.00097889	1.10948	0.149884	0.823872	-0.279508	1.60388	0.681569		2	59	57	A R T K Q T A R Kme Sph T G G	H3 1-13	H3K9me1	H3S10ph
60	58	124287	127770	133018	128358	4395.13	16.9698	0.000754993	0.000751193	130532	136563	137944	135013	3941.61	17.0427	0.000459491	0.00093303	1.05184	0.0729214	0.608604	-0.716425	1.24206	0.31274		2	60	58	A R T K Q T A R Kme2 Sph T G G	H3 1-13	H3K9me2	H3S10ph
61	59	145565	112710	115590	124622	18194.5	16.9272	0.000652373	0.000649089	152586	139032	137657	143092	8251.03	17.1266	0.000680343	0.00115378	1.14821	0.199385	1.04287	0.0605657	1.77753	0.829875		2	61	59	A R T K Q T A R Kme3 Sph T G G	H3 1-13	H3K9me3	H3S10ph
62	60	225043	291721	252411	256392	33516.8	17.968	0.00427117	0.00424967	210509	210159	187612	202760	13119.7	17.6294	0.00231154	0.0027842	0.790821	-0.338576	0.541196	-0.885778	0.655157	-0.610088		2	62	60	A R T K Q T A R Kac Sph T G G	H3 1-13	H3K9ac	H3S10ph
63	61	125457	124986	352494	200979	131216	17.6167	0.00274937	0.00273553	145606	149828	147911	147782	2113.97	17.1731	0.000808557	0.00128193	0.735309	-0.443577	0.294088	-1.76568	0.468622	-1.0935		2	63	61	A R T K Q T A Rme Kme S T G G	H3 1-13	H3R8me1	H3K9me1
64	62	122553	121912	122407	122291	335.962	16.9	0.000588357	0.000585396	137002	143536	146856	142465	5013.6	17.1202	0.000663203	0.00113664	1.16497	0.22029	1.12721	0.172758	1.94167	0.957297		2	64	62	A R T K Q T A Rme Kme2 S T G G	H3 1-13	H3R8me1	H3K9me2
65	63	186910	175532	146420	169621	20882.2	17.372	0.00188818	0.00187867	216397	215533	196220	209383	11408	17.6758	0.0024926	0.00296518	1.23442	0.303835	1.32011	0.400658	1.57834	0.658404		2	65	63	A R T K Q T A Rme Kme3 S T G G	H3 1-13	H3R8me1	H3K9me3
66	64	321854	357923	350659	343479	19076.5	18.3899	0.00666283	0.00662929	339094	338932	349070	342365	5806.98	18.3852	0.00612802	0.00659887	0.996759	-0.00468387	0.919732	-0.120714	0.995411	-0.0066357		2	66	64	A R T K Q T A Rme Kac S T G G	H3 1-13	H3R8me1	H3K9ac
67	65	138155	139844	139608	139202	914.661	17.0868	0.0010528	0.0010475	163387	169830	169372	167530	3594.96	17.3541	0.00134842	0.00182154	1.2035	0.267233	1.28079	0.357038	1.73894	0.798204		2	67	65	A R T K Q T A Rme2a Kme S T G G	H3 1-13	H3R8me2a	H3K9me1
68	66	130513	130861	135347	132240	2696.07	17.0128	0.000861604	0.000857267	154518	154342	153538	154133	522.461	17.2338	0.000982179	0.00145547	1.16555	0.22101	1.13994	0.18896	1.6978	0.763667		2	68	66	A R T K Q T A Rme2a Kme2 S T G G	H3 1-13	H3R8me2a	H3K9me2
69	67	174220	173889	180264	176124	3588.87	17.4262	0.00206679	0.00205639	227071	241820	220751	229881	10811.9	17.8105	0.00305295	0.00352526	1.30522	0.384291	1.47715	0.562814	1.7143	0.77762		2	69	67	A R T K Q T A Rme2a Kme3 S T G G	H3 1-13	H3R8me2a	H3K9me3
70	68	561750	608304	652528	607527	45394	19.2126	0.0139144	0.0138443	570051	533008	546285	549781	18767.4	19.0685	0.0117983	0.0122665	0.904949	-0.144091	0.84792	-0.237999	0.886026	-0.174579		2	70	68	A R T K Q T A Rme2a Kac S T G G	H3 1-13	H3R8me2a	H3K9ac
71	69	129842	128029	128914	128928	906.585	16.9762	0.000770647	0.000766768	161479	164766	164691	163645	1876.47	17.3202	0.00124223	0.0017154	1.26927	0.344003	1.61193	0.688794	2.23718	1.16168		2	71	69	A R T K Q T A Rme2s Kme S T G G	H3 1-13	H3R8me2s	H3K9me1
72	70	140717	128213	136999	135310	6420.89	17.0459	0.000945897	0.000941136	162518	160712	257532	193587	55385.1	17.5626	0.00206078	0.00253356	1.4307	0.51672	2.17865	1.12343	2.69202	1.42869		2	72	70	A R T K Q T A Rme2s Kme2 S T G G	H3 1-13	H3R8me2s	H3K9me2
73	71	119611	110429	111007	113682	5142.5	16.7946	0.000351947	0.000350175	135198	129739	131471	132136	2789.59	17.0117	0.000380841	0.000854416	1.16233	0.217016	1.0821	0.113831	2.43997	1.28686		2	73	71	A R T K Q T A Rme2s Kme3 S T G G	H3 1-13	H3R8me2s	H3K9me3
74	72	934237	858147	840360	877581	49864.7	19.7432	0.0213309	0.0212235	834320	815425	818547	822764	10128.8	19.6501	0.019261	0.0197256	0.937536	-0.0930542	0.902964	-0.14726	0.929424	-0.105591		2	74	72	A R T K Q T A Rme2s Kac S T G G	H3 1-13	H3R8me2s	H3K9ac
75	73	153394	151925	155482	153600	1787.45	17.2288	0.00144821	0.00144092	182265	182785	186059	183703	2056.85	17.487	0.00179056	0.00226347	1.19598	0.258194	1.23639	0.306139	1.57085	0.651543		2	75	73	A R T K Q T A Rcit Kme S T G G	H3 1-13	H3R8cit	H3K9me1
76	74	121208	125734	129100	125347	3960.18	16.9356	0.000672302	0.000668918	147144	149761	146084	147663	1892.64	17.1719	0.000805313	0.00127869	1.17803	0.236377	1.19784	0.26044	1.91158	0.934762		2	76	74	A R T K Q T A Rcit Kme2 S T G G	H3 1-13	H3R8cit	H3K9me2
77	75	121108	125996	123765	123623	2447.09	16.9156	0.000624947	0.000621801	140197	138227	129481	135968	5703.89	17.0529	0.000485608	0.000959134	1.09986	0.137324	0.777039	-0.363941	1.54251	0.625279		2	77	75	A R T K Q T A Rcit Kme3 S T G G	H3 1-13	H3R8cit	H3K9me3
78	76	562476	620259	549350	577362	37725.4	19.1391	0.0130859	0.0130201	697401	716591	608577	674190	57626.6	19.3628	0.0151993	0.0156659	1.16771	0.223679	1.1615	0.215989	1.20321	0.266887		2	78	76	A R T K Q T A Rcit Kac S T G G	H3 1-13	H3R8cit	H3K9ac
79	77	138923	146296	137653	140957	4666.82	17.1049	0.001101	0.00109546	166814	166760	170593	168056	2197.56	17.3586	0.0013628	0.00183591	1.19224	0.253681	1.23779	0.307762	1.67593	0.744963		2	79	77	A R T Kme Q T A R Kme S T G G	H3 1-13	H3K4me1	H3K9me1
80	78	134623	138839	135134	136199	2300.83	17.0554	0.000970312	0.000965428	158032	157622	155616	157090	1292.88	17.2612	0.00106303	0.00153628	1.15339	0.205879	1.09555	0.131656	1.59129	0.670199		2	80	78	A R T Kme Q T A R Kme2 S T G G	H3 1-13	H3K4me1	H3K9me2
81	79	145980	152464	153301	150582	4007.07	17.2002	0.00136531	0.00135844	159598	160933	158295	159609	1319.03	17.2842	0.00113188	0.0016051	1.05995	0.0839929	0.829027	-0.270509	1.18158	0.240713		2	81	79	A R T Kme Q T A R Kme3 S T G G	H3 1-13	H3K4me1	H3K9me3
82	80	786897	975900	697596	820131	142097	19.6455	0.0197531	0.0196537	703065	1046368	818199	855877	174725	19.707	0.0201662	0.0206304	1.04359	0.0615497	1.02091	0.0298624	1.0497	0.069975		2	82	80	A R T Kme Q T A R Kac S T G G	H3 1-13	H3K4me1	H3K9ac
83	81	165459	177341	163325	168708	7551.87	17.3642	0.00186312	0.00185374	211710	194660	178349	194906	16681.9	17.5724	0.00209684	0.0025696	1.15529	0.20825	1.12544	0.170491	1.38617	0.4711		2	83	81	A R T Kme2 Q T A R Kme S T G G	H3 1-13	H3K4me2	H3K9me1
84	82	149596	148015	150440	149350	1231.02	17.1883	0.0013315	0.00132479	176501	172531	185088	178040	6418.41	17.4418	0.00163575	0.00210873	1.1921	0.253501	1.22851	0.296904	1.59174	0.670607		2	84	82	A R T Kme2 Q T A R Kme2 S T G G	H3 1-13	H3K4me2	H3K9me2
85	83	140708	149146	154659	148171	7026.42	17.1769	0.00129911	0.00129257	172360	165054	165408	167607	4119.73	17.3547	0.00135054	0.00182366	1.13118	0.177822	1.03959	0.0560207	1.41088	0.496597		2	85	83	A R T Kme2 Q T A R Kme3 S T G G	H3 1-13	H3K4me2	H3K9me3
86	84	466467	514633	518932	500011	29129.1	18.9316	0.0109617	0.0109065	497812	530015	546333	524720	24690.1	19.0012	0.0111132	0.0115817	1.04942	0.0695889	1.01382	0.0198041	1.06191	0.0866559		2	86	84	A R T Kme2 Q T A R Kac S T G G	H3 1-13	H3K4me2	H3K9ac
87	85	153302	145262	154870	151145	5154.51	17.2056	0.00138077	0.00137382	201135	187821	163198	184051	19247.4	17.4897	0.00180008	0.00227299	1.21772	0.284178	1.30368	0.382589	1.6545	0.726394		2	87	85	A R T Kme3 Q T A R Kme S T G G	H3 1-13	H3K4me3	H3K9me1
88	86	155197	149189	153458	152615	3091.51	17.2195	0.00142114	0.00141399	177085	173824	172974	174628	2170.14	17.4139	0.00154246	0.00201549	1.14424	0.194389	1.08537	0.118185	1.42539	0.511358		2	88	86	A R T Kme3 Q T A R Kme2 S T G G	H3 1-13	H3K4me3	H3K9me2
89	87	114184	115997	114847	115009	917.337	16.8114	0.00038839	0.000386435	127823	127092	126044	126986	894.195	16.9543	0.000240061	0.000713703	1.10414	0.142922	0.618093	-0.694105	1.84689	0.885098		2	89	87	A R T Kme3 Q T A R Kme3 S T G G	H3 1-13	H3K4me3	H3K9me3
90	88	191746	188684	204954	195128	8646.19	17.5741	0.00258868	0.00257565	200096	194622	193116	195945	3673.17	17.5801	0.00212522	0.00259797	1.00419	0.00602549	0.820966	-0.284606	1.00866	0.0124455		2	90	88	A R T Kme3 Q T A R Kac S T G G	H3 1-13	H3K4me3	H3K9ac
91	921	19357010	22398106	18351014	2.00354e+07	2.1071e+06	24.256	0.54746	0.544705	18713035	17938162	17787631	18146276	496565	24.1132	0.492845	0.493086	0.905712	-0.142876	0.900239	-0.151619	0.905235	-0.143636		2	91	921	A R T Kac Q T A R Kme S T G G	H3 1-13	H3K4ac	H3K9me1
92	922	377209	331286	332579	347025	26148.4	18.4047	0.00676021	0.00672619	352233	336238	336823	341765	9070.56	18.3826	0.0061116	0.00658246	0.984843	-0.022035	0.904054	-0.145519	0.978632	-0.0311623		2	92	922	A R T Kac Q T A R Kme2 S T G G	H3 1-13	H3K4ac	H3K9me2
93	923	574678	615858	628492	606343	28140.6	19.2098	0.0138819	0.013812	608501	617957	585639	604032	16616	19.2043	0.0132814	0.0137488	0.99619	-0.00550757	0.956745	-0.0637943	0.995429	-0.00660912		2	93	923	A R T Kac Q T A R Kme3 S T G G	H3 1-13	H3K4ac	H3K9me3
94	924	316667	317196	296915	310259	11559.6	18.2431	0.00575053	0.00572159	321262	304578	291727	305856	14808.9	18.2225	0.00512993	0.00560126	0.985806	-0.0206236	0.89208	-0.164756	0.978969	-0.0306645		2	94	924	A R T Kac Q T A R Kac S T G G	H3 1-13	H3K4ac	H3K9ac
95	897	151210	173307	154359	159625	11952.8	17.2843	0.00161368	0.00160555	154368	244012	210949	203110	45333.2	17.6319	0.0023211	0.00279375	1.27241	0.347569	1.43839	0.524454	1.74005	0.799132		2	95	897	A R T K Q Tph A R Kme S T G G	H3 1-13	H3T6ph	H3K9me1
96	898	163317	157802	134940	152020	15046.3	17.2139	0.0014048	0.00139773	193926	181820	150998	175581	22133.5	17.4218	0.00156853	0.00204155	1.15499	0.207881	1.11655	0.15905	1.46061	0.546576		2	96	898	A R T K Q Tph A R Kme2 S T G G	H3 1-13	H3T6ph	H3K9me2
97	899	117067	116731	115431	116410	864.04	16.8289	0.000426847	0.000424699	127391	128461	131789	129214	2293.57	16.9794	0.000300951	0.000774565	1.10999	0.150548	0.705056	-0.504191	1.8238	0.866945		2	97	899	A R T K Q Tph A R Kme3 S T G G	H3 1-13	H3T6ph	H3K9me3
98	900	760954	775310	755798	764021	10111	19.5433	0.0182122	0.0181205	599481	625469	588405	604452	19025.4	19.2053	0.0132928	0.0137603	0.791146	-0.337985	0.729889	-0.454251	0.759379	-0.397109		2	98	900	A R T K Q Tph A R Kac S T G G	H3 1-13	H3T6ph	H3K9ac
99	901	128149	125795	139475	131140	7313.94	17.0007	0.000831377	0.000827192	136442	144727	141709	140959	4193.07	17.1049	0.00062205	0.00109551	1.07488	0.104175	0.748217	-0.418471	1.32437	0.405311		2	99	901	A R Tph K Q T A R Kme S T G G	H3 1-13	H3T3ph	H3K9me1
100	902	135671	127780	131262	131571	3954.56	17.0055	0.000843222	0.000838978	159708	148511	146610	151610	7077.48	17.21	0.000913206	0.00138653	1.1523	0.20452	1.083	0.115027	1.65264	0.724773		2	100	902	A R Tph K Q T A R Kme2 S T G G	H3 1-13	H3T3ph	H3K9me2
101	903	117222	113713	114114	115016	1920.66	16.8115	0.000388582	0.000386626	130642	129411	128795	129616	940.41	16.9839	0.00031195	0.000785558	1.12694	0.172405	0.80279	-0.316905	2.03183	1.02278		2	101	903	A R Tph K Q T A R Kme3 S T G G	H3 1-13	H3T3ph	H3K9me3
102	904	247621	247011	242274	245635	2926.93	17.9062	0.00397576	0.00395575	252153	249816	251277	251082	1180.64	17.9378	0.00363255	0.00410458	1.02217	0.0316405	0.913672	-0.130251	1.03762	0.0532828		2	102	904	A R Tph K Q T A R Kac S T G G	H3 1-13	H3T3ph	H3K9ac
103	905	130833	124812	131002	128882	3526.02	16.9757	0.000769384	0.000765511	140436	142603	144392	142477	1981.01	17.1204	0.00066354	0.00113698	1.10548	0.144675	0.86243	-0.21352	1.48526	0.570714		2	103	905	A Rme T K Q T A R Kme1 S T G G	H3 1-13	H3R2me1	H3K9me1
104	906	137084	134799	122464	131449	7864.67	17.0041	0.000839872	0.000835644	154184	150707	140324	148405	7211.05	17.1792	0.000825597	0.00129896	1.12899	0.175037	0.983004	-0.0247306	1.55444	0.636398		2	104	906	A Rme T K Q T A R Kme2 S T G G	H3 1-13	H3R2me1	H3K9me2
105	907	122873	129128	127398	126466	3229.9	16.9484	0.000703033	0.000699494	142987	142035	140163	141728	1436.76	17.1128	0.000643073	0.00111652	1.12068	0.164375	0.914712	-0.12861	1.59619	0.67463		2	105	907	A Rme T K Q T A R Kme3 S T G G	H3 1-13	H3R2me1	H3K9me3
106	908	226239	209601	232236	222692	11727	17.7647	0.00334567	0.00332883	267547	265340	253399	262095	7611.66	17.9997	0.00393363	0.00440552	1.17694	0.235042	1.17574	0.233563	1.32344	0.404295		2	106	908	A Rme T K Q T A R Kac S T G G	H3 1-13	H3R2me1	H3K9ac
107	909	152310	157898	162741	157650	5219.93	17.2664	0.00155942	0.00155157	202582	201446	203468	202499	1013.57	17.6276	0.00230439	0.00277706	1.28449	0.36119	1.47772	0.563377	1.78984	0.839827		2	107	909	A Rme2a T K Q T A R Kme S T G G	H3 1-13	H3R2me2a	H3K9me1
108	910	120581	119839	117958	119459	1352.09	16.8662	0.0005106	0.00050803	134579	134966	134008	134518	481.936	17.0374	0.00044595	0.000919495	1.12605	0.171276	0.873384	-0.195312	1.80992	0.855927		2	108	910	A Rme2a T K Q T A R Kme2 S T G G	H3 1-13	H3R2me2a	H3K9me2
109	911	109077	106819	105666	107187	1735.07	16.7098	0.000173575	0.000172701	126299	124707	125177	125394	817.949	16.9361	0.00019654	0.000670202	1.16986	0.226338	1.1323	0.179261	3.8807	1.95632		2	109	911	A Rme2a T K Q T A R Kme3 S T G G	H3 1-13	H3R2me2a	H3K9me3
110	912	115532	113449	152972	127318	22241.7	16.9581	0.000726413	0.000722757	176909	166935	170541	171462	5050.34	17.3875	0.00145591	0.00192898	1.34672	0.429453	2.00425	1.00306	2.66892	1.41626		2	110	912	A Rme2a T K Q T A R Kac S T G G	H3 1-13	H3R2me2a	H3K9ac
111	BLANK-2	103425	109629	115274	109443	5926.7	16.7398	0.000235513	0.000234328	116888	119770	120964	119207	2095.44	16.8631	2.74015e-05	0.000501144	1.08922	0.123298	0.116348	-3.10348	2.13865	1.0967		2	111			BLANK-2
112	NEGCTRL-2	184060	183092	187078	184743	2079	17.4952	0.00230349	0.0022919	194944	198592	196414	196650	1835.41	17.5853	0.0021445	0.00261724	1.06445	0.0901079	0.93098	-0.103179	1.14196	0.191506		2	112	481	5% S G Rme G K G G K G L G K G	NEGCTRL-2
113	913	117928	119073	116864	117955	1104.75	16.8479	0.000469287	0.000466925	158095	151800	158600	156165	3788.62	17.2527	0.00103774	0.001511	1.32394	0.404835	2.21131	1.1449	3.23607	1.69424		3	113	913	A Rme2s T K Q T A R Kme S T G G	H3 1-13	H3R2me2s	H3K9me1
114	914	116185	113682	115569	115145	1304.17	16.8131	0.000392125	0.000390151	162423	161478	162326	162076	519.862	17.3063	0.00119932	0.00167251	1.40757	0.493212	3.05852	1.61283	4.28682	2.09991		3	114	914	A Rme2s T K Q T A R Kme2 S T G G	H3 1-13	H3R2me2s	H3K9me2
115	915	115193	116912	114582	115562	1208.11	16.8183	0.000403577	0.000401546	159443	153535	145244	152741	7132.75	17.2207	0.000944124	0.00141743	1.32172	0.402413	2.33939	1.22613	3.52994	1.81964		3	115	915	A Rme2s T K Q T A R Kme3 S T G G	H3 1-13	H3R2me2s	H3K9me3
116	916	340572	342581	351771	344975	5970.9	18.3961	0.00670392	0.00667017	371622	390343	378742	380236	9449.46	18.5365	0.00716331	0.00763367	1.10221	0.140403	1.06853	0.0956217	1.14445	0.194653		3	116	916	A Rme2s T K Q T A R Kac S T G G	H3 1-13	H3R2me2s	H3K9ac
117	917	122774	114378	113688	116947	5058.4	16.8355	0.000441595	0.000439372	150756	152327	156130	153071	2763.17	17.2238	0.000953155	0.00142646	1.3089	0.38835	2.15844	1.10999	3.24658	1.69892		3	117	917	A Rcit T K Q T A R Kme S T G G	H3 1-13	H3R2cit	H3K9me1
118	918	112255	109894	110390	110846	1244.89	16.7582	0.000274062	0.000272682	156503	163406	161604	160504	3580.48	17.2923	0.00115637	0.00162957	1.44799	0.534051	4.21936	2.07702	5.97608	2.5792		3	118	918	A Rcit T K Q T A R Kme2 S T G G	H3 1-13	H3R2cit	H3K9me2
119	919	114637	119446	122953	119012	4174.95	16.8607	0.000498315	0.000495807	168691	165116	153812	162540	7766.87	17.3104	0.00121201	0.00168519	1.36574	0.449685	2.43221	1.28227	3.39888	1.76506		3	119	919	A Rcit T K Q T A R Kme3 S T G G	H3 1-13	H3R2cit	H3K9me3
120	920	235648	231836	223080	230188	6444.03	17.8125	0.00355154	0.00353366	255864	276907	259127	263966	11325.4	18.01	0.00398477	0.00445663	1.14674	0.197539	1.12198	0.166052	1.2612	0.334791		3	120	920	A Rcit T K Q T A R Kac S T G G	H3 1-13	H3R2cit	H3K9ac
126	89	457814	493152	471762	474243	17799.1	18.8553	0.010254	0.0102024	471306	487963	519758	493009	24617	18.9113	0.0102463	0.0107152	1.03957	0.0559885	0.999246	-0.0010879	1.05026	0.0707483		3	126	A89	Q T A R K S T G G K A P R	H3 5-17
127	90	407339	440436	397981	415252	22306.2	18.6636	0.00863394	0.00859048	465312	476209	440863	460795	18100.8	18.8138	0.0093656	0.00983492	1.10967	0.150137	1.08474	0.117353	1.14486	0.195175		3	127	A90	Q T A Rme K S T G G K A P R	H3 5-17	H3R8me1
128	91	496178	547608	585920	543235	45030.5	19.0512	0.0121487	0.0120876	527403	528985	521823	526070	3762.39	19.0049	0.0111501	0.0116186	0.968402	-0.0463216	0.917798	-0.123752	0.961197	-0.0570952		3	128	A91	Q T A Rme2a K S T G G K A P R	H3 5-17	H3R8me2a
129	92	124948	118813	124156	122639	3336.99	16.9041	0.000597923	0.000594914	140992	141363	141330	141228	205.335	17.1077	0.000629404	0.00110286	1.15158	0.203612	1.05265	0.0740264	1.85382	0.8905		3	129	A92	Q T A Rme2s K S T G G K A P R	H3 5-17	H3R8me2s
130	93	148126	144952	145646	146241	1668.65	17.158	0.00124611	0.00123984	176370	167952	171735	172019	4216.18	17.3922	0.00147115	0.00194421	1.17627	0.234217	1.18059	0.239509	1.56811	0.649028		3	130	A93	Q T A Rcit K S T G G K A P R	H3 5-17	H3R8cit
131	94	271425	264086	265991	267167	3808.29	18.0274	0.0045671	0.00454411	326699	344794	311406	327633	16713.6	18.3217	0.00572527	0.00619632	1.22632	0.294337	1.25359	0.326067	1.36359	0.447413		3	131	A94	Q T A R Kme S T G G K A P R	H3 5-17	H3K9me1
132	95	472158	527368	542474	514000	37015	18.9714	0.0113458	0.0112887	554227	735984	545263	611825	107619	19.2228	0.0134944	0.0139618	1.19032	0.25135	1.18937	0.250197	1.23679	0.306597		3	132	A95	Q T A R Kme2 S T G G K A P R	H3 5-17	H3K9me2
133	96	362072	359869	330583	350841	17578.8	18.4205	0.00686503	0.00683048	335357	340588	330877	335607	4860.34	18.3564	0.00594327	0.00641421	0.956579	-0.0640445	0.865731	-0.208009	0.939058	-0.0907142		3	133	A96	Q T A R Kme3 S T G G K A P R	H3 5-17	H3K9me3
134	97	677858	671927	695013	681599	11989.1	19.3786	0.0159486	0.0158683	588770	606832	634616	610073	23094.2	19.2186	0.0134465	0.0139139	0.895061	-0.159943	0.843115	-0.246199	0.876834	-0.189625		3	134	A97	Q T A R Kac S T G G K A P R	H3 5-17	H3K9ac
135	98	122554	127425	125872	125284	2488.22	16.9348	0.000670554	0.000667178	159837	160567	159850	160085	417.763	17.2885	0.00114489	0.00161811	1.27778	0.353637	1.70738	0.771787	2.4253	1.27816		3	135	98	Q T A R K Sph T G G K A P R	H3 5-17	H3S10ph
136	99	137202	133155	129229	133195	3986.65	17.0232	0.000887831	0.000883362	177552	175934	173249	175578	2173.44	17.4218	0.00156845	0.00204147	1.3182	0.398571	1.76661	0.820985	2.31102	1.20853		3	136	99	Q T A R K S Tph G G K A P R	H3 5-17	H3T11ph
137	100	122845	124768	126627	124747	1891.09	16.9286	0.000655806	0.000652505	157533	161025	157777	158778	1949.49	17.2767	0.00110918	0.00158241	1.27281	0.348013	1.69132	0.758153	2.42513	1.27806		3	137	A100	Q T A R K S T G G Kme A P R	H3 5-17	H3K14me1
138	101	139645	125681	126467	130598	7845.07	16.9948	0.000816492	0.000812382	152817	158475	158523	156605	3280.59	17.2568	0.00104977	0.00152302	1.19914	0.262001	1.2857	0.362558	1.87476	0.906709		3	138	A101	Q T A R K S T G G Kme2 A P R	H3 5-17	H3K14me2
139	102	118291	116545	115991	116942	1200.38	16.8354	0.000441476	0.000439254	134276	142521	136828	137875	4221.04	17.073	0.000537732	0.00101123	1.179	0.237564	1.21803	0.284552	2.30216	1.20299		3	139	A102	Q T A R K S T G G Kme3 A P R	H3 5-17	H3K14me3
140	103	450308	451870	463520	455233	7219.41	18.7962	0.00973192	0.00968294	506944	526171	509948	514354	10343.2	18.9724	0.0108298	0.0112984	1.12987	0.176158	1.11281	0.154209	1.16684	0.222604		3	140	A103	Q T A R K S T G G Kac A P R	H3 5-17	H3K14ac
141	104	118799	117751	123930	120160	3306.7	16.8746	0.000529843	0.000527176	153679	151014	189372	164688	21418.2	17.3294	0.00127075	0.0017439	1.37058	0.454782	2.39835	1.26204	3.308	1.72596		3	141	A104	Q T A Rme Kme S T G G K A P R	H3 5-17	H3R8me1	H3K9me1
142	105	132022	134878	189346	152082	32303.1	17.2145	0.00140651	0.00139944	160029	168144	167307	165160	4463.24	17.3335	0.00128364	0.00175679	1.08599	0.119015	0.912639	-0.131884	1.25535	0.328095		3	142	A105	Q T A Rme Kme2 S T G G K A P R	H3 5-17	H3R8me1	H3K9me2
143	106	153576	143722	145005	147434	5357.39	17.1697	0.00127888	0.00127244	188456	168452	175915	177608	10108.8	17.4383	0.00162393	0.00209692	1.20466	0.268621	1.26981	0.344613	1.64795	0.720673		3	143	A106	Q T A Rme Kme3 S T G G K A P R	H3 5-17	H3R8me1	H3K9me3
144	107	456826	458866	506718	474137	28234.7	18.8549	0.0102511	0.0101995	443440	551703	516626	503923	55238.1	18.9428	0.0105446	0.0110134	1.06282	0.0879003	1.02864	0.0407319	1.0798	0.110762		3	144	A107	Q T A Rme Kac S T G G K A P R	H3 5-17	H3R8me1	H3K9ac
145	108	116980	118471	117654	117702	746.642	16.8448	0.00046233	0.000460002	152883	148773	145585	149080	3658.69	17.1857	0.00084406	0.00131742	1.26659	0.340955	1.82567	0.868423	2.86393	1.518		3	145	A108	Q T A Rme2a Kme S T G G K A P R	H3 5-17	H3R8me2a	H3K9me1
146	109	123297	124923	126772	124997	1738.69	16.9315	0.00066269	0.000659354	148519	150676	152890	150695	2185.56	17.2013	0.000888201	0.00136154	1.20559	0.269734	1.3403	0.422552	2.06495	1.04611		3	146	A109	Q T A Rme2a Kme2 S T G G K A P R	H3 5-17	H3R8me2a	H3K9me2
147	110	131186	132237	127911	130445	2256.27	16.9931	0.00081229	0.000808201	161910	161754	151359	158341	6047.09	17.2727	0.00109722	0.00157046	1.21386	0.279597	1.35078	0.433792	1.94316	0.958401		3	147	A110	Q T A Rme2a Kme3 S T G G K A P R	H3 5-17	H3R8me2a	H3K9me3
148	111	144356	147178	141710	144415	2734.47	17.1399	0.00119595	0.00118993	173583	176354	177483	175807	2006.78	17.4236	0.0015747	0.0020477	1.21737	0.283773	1.31669	0.396919	1.72087	0.783134		3	148	A111	Q T A Rme2a Kac S T G G K A P R	H3 5-17	H3R8me2a	H3K9ac
149	112	222248	140830	140676	167918	47051.2	17.3574	0.00184142	0.00183215	181750	167326	152609	167228	14570.7	17.3515	0.00134018	0.0018133	0.995893	-0.00593759	0.7278	-0.458387	0.989714	-0.014916		3	149	A112	Q T A Rme2s Kme S T G G K A P R	H3 5-17	H3R8me2s	H3K9me1
150	113	120814	145218	132367	132800	12207.8	17.0189	0.000876965	0.000872551	154965	163156	193156	170426	20106.6	17.3788	0.00142759	0.00190067	1.28333	0.359891	1.62788	0.702991	2.17829	1.1232		3	150	A113	Q T A Rme2s Kme2 S T G G K A P R	H3 5-17	H3R8me2s	H3K9me2
151	114	121615	122565	125516	123232	2034.24	16.911	0.000614209	0.000611117	149792	154772	156850	153805	3627.07	17.2307	0.000973212	0.00144651	1.24809	0.319722	1.5845	0.664025	2.36699	1.24305		3	151	A114	Q T A Rme2s Kme3 S T G G K A P R	H3 5-17	H3R8me2s	H3K9me3
152	115	196375	199662	211834	202624	8143.94	17.6284	0.00279454	0.00278047	249552	264420	242629	252200	11134.3	17.9442	0.00366312	0.00413514	1.24467	0.315767	1.31081	0.390463	1.48721	0.572606		3	152	A115	Q T A Rme2s Kac S T G G K A P R	H3 5-17	H3R8me2s	H3K9ac
153	116	130344	126211	126083	127546	2423.98	16.9607	0.000732684	0.000728996	166036	166983	166735	166585	491.073	17.3459	0.00132259	0.00179572	1.30608	0.385238	1.80513	0.8521	2.46327	1.30058		3	153	A116	Q T A Rcit Kme S T G G K A P R	H3 5-17	H3R8cit	H3K9me1
154	117	114177	113288	118352	115272	2703.86	16.8147	0.000395613	0.000393622	146937	145257	139283	143826	4022.74	17.134	0.000700409	0.00117383	1.2477	0.319275	1.77044	0.824109	2.98214	1.57635		3	154	A117	Q T A Rcit Kme2 S T G G K A P R	H3 5-17	H3R8cit	H3K9me2
155	118	131472	133524	139036	134677	3911.67	17.0391	0.000928531	0.000923858	151653	156665	160401	156240	4389.48	17.2534	0.00103978	0.00151304	1.1601	0.214254	1.11981	0.163254	1.63774	0.71171		3	155	A118	Q T A Rcit Kme3 S T G G K A P R	H3 5-17	H3R8cit	H3K9me3
156	119	953447	959501	960474	957807	3807.37	19.8694	0.0235341	0.0234156	889879	995656	1049212	978249	81080.2	19.8998	0.0235116	0.0239742	1.02134	0.0304662	0.999043	-0.00138063	1.02385	0.0340104		3	156	A119	Q T A Rcit Kac S T G G K A P R	H3 5-17	H3R8cit	H3K9ac
157	120	120394	118948	117881	119074	1261.25	16.8615	0.000500027	0.00049751	147765	148939	147643	148116	715.632	17.1764	0.000817688	0.00129106	1.24389	0.314862	1.63529	0.709544	2.59503	1.37575		3	157	120	Q T A Rme K Sph T G G K A P R	H3 5-17	H3R8me1	H3S10ph
158	121	117193	119089	120678	118987	1744.75	16.8604	0.000497619	0.000495115	150867	146672	145748	147762	2728.12	17.1729	0.000808028	0.0012814	1.24184	0.312479	1.62379	0.699363	2.58809	1.37189		3	158	121	Q T A Rme2a K Sph T G G K A P R	H3 5-17	H3R8me2a	H3S10ph
159	122	125957	128479	131271	128569	2658.14	16.9722	0.000760779	0.000756949	147182	148374	152044	149200	2534.06	17.1869	0.000847331	0.00132069	1.16047	0.214705	1.11377	0.155449	1.74475	0.803018		3	159	122	Q T A Rme2s K Sph T G G K A P R	H3 5-17	H3R8me2s	H3S10ph
160	123	127173	130928	121297	126466	4854.27	16.9484	0.000703024	0.000699485	153224	154232	141030	149495	7348.5	17.1897	0.000855405	0.00132876	1.1821	0.241351	1.21675	0.283033	1.89962	0.92571		3	160	123	Q T A Rcit K Sph T G G K A P R	H3 5-17	H3R8cit	H3S10ph
161	124	154036	155215	151667	153639	1806.95	17.2292	0.00144928	0.00144199	190439	190433	184030	188301	3698.51	17.5227	0.00191625	0.0023891	1.2256	0.29349	1.32221	0.402947	1.65681	0.728407		3	161	124	Q T A Rme K S Tph G G K A P R	H3 5-17	H3R8me1	H3T11ph
162	125	113486	116822	115501	115270	1679.99	16.8147	0.00039554	0.000393549	145814	145335	143041	144730	1482.19	17.143	0.000725132	0.00119854	1.25558	0.328351	1.83327	0.87442	3.04548	1.60667		3	162	125	Q T A Rme2a K S Tph G G K A P R	H3 5-17	H3R8me2a	H3T11ph
163	126	116983	121373	121653	120003	2619.14	16.8727	0.000525531	0.000522886	146433	140725	144959	144039	2963.13	17.1361	0.000706241	0.00117966	1.20029	0.263389	1.34386	0.426385	2.25606	1.17381		3	163	126	Q T A Rme2s K S Tph G G K A P R	H3 5-17	H3R8me2s	H3T11ph
164	127	126601	125811	123921	125444	1377.11	16.9367	0.000674966	0.000671569	145519	150327	151244	149030	3074.99	17.1852	0.000842684	0.00131604	1.18802	0.248555	1.24848	0.320176	1.95965	0.970597		3	164	127	Q T A Rcit K S Tph G G K A P R	H3 5-17	H3R8cit	H3T11ph
165	128	120328	120189	119099	119872	673.036	16.8711	0.000521933	0.000519306	145380	147943	152662	148662	3693.81	17.1817	0.000832614	0.00130598	1.24017	0.310538	1.59525	0.673783	2.51485	1.33047		3	165	128	Q T A R Kme Sph T G G K A P R	H3 5-17	H3K9me1	H3S10ph
166	129	119632	119173	122835	120547	1995	16.8792	0.000540462	0.000537741	157392	154504	156050	155982	1445.2	17.251	0.00103273	0.001506	1.29396	0.371788	1.91084	0.934206	2.80061	1.48574		3	166	129	Q T A R Kme2 Sph T G G K A P R	H3 5-17	H3K9me2	H3S10ph
167	BLANK-3	113450	120398	152920	128923	21070.7	16.9761	0.000770491	0.000766613	152396	141397	145586	146460	5551.3	17.1601	0.000772417	0.00124581	1.13603	0.183997	1.0025	0.00360063	1.62508	0.70051		3	167			BLANK-3
168	540	152797	158562	257204	189521	58686	17.532	0.0024347	0.00242245	181159	175677	175121	177319	3337.14	17.436	0.00161604	0.00208903	0.935617	-0.0960106	0.663753	-0.591282	0.862364	-0.213631		3	168	540	10% K R H Rcit Kme V L R D N I Q G	NEGCTRL-3
169	130	186498	176913	195636	186349	9362.39	17.5076	0.00234759	0.00233577	208695	213545	223011	215084	7280.97	17.7145	0.00264844	0.00312094	1.1542	0.206891	1.12815	0.173962	1.33615	0.418081		4	169	130	Q T A R Kme3 Sph T G G K A P R	H3 5-17	H3K9me3	H3S10ph
170	131	8210765	7612943	6400345	7.40802e+06	922443	22.8207	0.200676	0.199666	6529727	6927417	6036762	6.49797e+06	446176	22.6316	0.174408	0.174799	0.877154	-0.189099	0.869102	-0.202402	0.875458	-0.191891		4	170	131	Q T A R Kac Sph T G G K A P R	H3 5-17	H3K9ac	H3S10ph
171	132	160970	142879	137674	147174	12227.6	17.1672	0.00127174	0.00126533	198945	175978	170804	181909	14978.7	17.4729	0.00174152	0.00221445	1.23601	0.305691	1.3694	0.453547	1.75009	0.807429		4	171	132	Q T A R Kme S Tph G G K A P R	H3 5-17	H3K9me1	H3T11ph
172	133	147898	137561	139003	141487	5598.42	17.1103	0.00111555	0.00110994	178443	173262	157559	169755	10874.8	17.3731	0.00140925	0.00188234	1.19979	0.262778	1.26327	0.337165	1.69589	0.762044		4	172	133	Q T A R Kme2 S Tph G G K A P R	H3 5-17	H3K9me2	H3T11ph
173	134	126038	119239	117487	120921	4516.92	16.8837	0.000550751	0.000547979	142649	145109	159906	149221	9334.58	17.1871	0.000847914	0.00132127	1.23404	0.303385	1.53956	0.622518	2.41117	1.26973		4	173	134	Q T A R Kme3 S Tph G G K A P R	H3 5-17	H3K9me3	H3T11ph
174	135	1391752	1736137	1732997	1.6203e+06	197931	20.6278	0.041728	0.0415179	1795746	1843323	1823580	1820883	23902.9	20.7962	0.0465472	0.0469989	1.1238	0.168381	1.11549	0.157681	1.13202	0.178893		4	174	135	Q T A R Kac S Tph G G K A P R	H3 5-17	H3K9ac	H3T11ph
175	136	144948	153856	153673	150826	5091.03	17.2025	0.00137201	0.00136511	181462	173880	181808	179050	4480.69	17.45	0.00166336	0.00213633	1.18713	0.247481	1.21235	0.277807	1.56495	0.64612		4	175	136	Q T A R K Sph Tph G G K A P R	H3 5-17	H3S10ph	H3T11ph
176	137	119359	124802	123788	122650	2894.55	16.9042	0.000598216	0.000595205	153450	203555	156968	171324	27967.9	17.3864	0.00145216	0.00192523	1.39686	0.482187	2.42748	1.27946	3.23456	1.69357		4	176	137	Q T A R K S Tph G G Kme A P R	H3 5-17	H3T11ph	H3K14me1
177	138	144625	145424	137879	142643	4144.75	17.122	0.00114728	0.00114151	173312	168319	166274	169302	3620.44	17.3692	0.00139686	0.00186996	1.18689	0.247191	1.21754	0.28397	1.63815	0.712064		4	177	138	Q T A R K S Tph G G Kme2 A P R	H3 5-17	H3T11ph	H3K14me2
178	139	124455	129509	154552	136172	16116.9	17.0551	0.000969579	0.000964699	159549	152658	151557	154588	4331.48	17.2381	0.000994626	0.00146791	1.13524	0.182998	1.02583	0.0367956	1.52163	0.605614		4	178	139	Q T A R K S Tph G G Kme3 A P R	H3 5-17	H3T11ph	H3K14me3
179	140	742092	545791	468237	585373	141153	19.159	0.013306	0.013239	706425	698404	722749	709193	12406.2	19.4358	0.0161562	0.0166223	1.21152	0.276821	1.21421	0.280016	1.25556	0.328328		4	179	140	Q T A R K S Tph G G Kac A P R	H3 5-17	H3T11ph	H3K14ac
180	141	122454	130951	124718	126041	4400.28	16.9435	0.000691352	0.000687872	156267	169363	163447	163026	6558.16	17.3147	0.00122529	0.00169847	1.29343	0.371206	1.77231	0.825633	2.46916	1.30402		4	180	141	Q T A R K Sph T G G Kme A P R	H3 5-17	H3S10ph	H3K14me1
181	142	158552	152412	143036	151333	7814.04	17.2074	0.00138595	0.00137898	185382	179487	178876	181248	3592.87	17.4676	0.00172346	0.0021964	1.19768	0.260238	1.24352	0.314426	1.59277	0.671539		4	181	142	Q T A R K Sph T G G Kme2 A P R	H3 5-17	H3S10ph	H3K14me2
182	143	124389	129171	130487	128016	3208.97	16.966	0.000745582	0.00074183	163467	170275	161542	165095	4588.39	17.3329	0.00128185	0.001755	1.28964	0.366973	1.71927	0.781792	2.36578	1.24231		4	182	143	Q T A R K Sph T G G Kme3 A P R	H3 5-17	H3S10ph	H3K14me3
183	144	226848	568850	238093	344597	194290	18.3946	0.00669354	0.00665985	336269	344372	316803	332481	14169.4	18.3429	0.00585781	0.0063288	0.964841	-0.0516368	0.875144	-0.192408	0.950291	-0.0735593		4	183	144	Q T A R K Sph T G G Kac A P R	H3 5-17	H3S10ph	H3K14ac
184	145	129687	138211	137069	134989	4627.03	17.0425	0.000937091	0.000932374	160558	161741	171916	164738	6244.12	17.3298	0.00127211	0.00174527	1.22038	0.287334	1.35751	0.440966	1.87185	0.904466		4	184	A145	Q T A R Kme S T G G Kme A P R	H3 5-17	H3K9me1	H3K14me1
185	146	125984	119000	121370	122118	3551.58	16.8979	0.000583615	0.000580677	158229	155173	147434	153612	5564.22	17.2289	0.000967945	0.00144124	1.2579	0.331015	1.65853	0.729908	2.482	1.3115		4	185	A146	Q T A R Kme S T G G Kme2 A P R	H3 5-17	H3K9me1	H3K14me2
186	147	104114	103471	104192	103926	395.68	16.6652	8.4e-05	8.35772e-05	126784	126812	124946	126181	1069.34	16.9451	0.000218036	0.000691689	1.21414	0.279939	2.59567	1.37611	8.27605	3.04894		4	186	A147	Q T A R Kme S T G G Kme3 A P R	H3 5-17	H3K9me1	H3K14me3
187	148	287935	298986	316586	301169	14449.7	18.2002	0.00550088	0.00547319	375565	370736	394699	380333	12673.2	18.5369	0.00716598	0.00763634	1.26286	0.336691	1.3027	0.3815	1.39522	0.480498		4	187	A148	Q T A R Kme S T G G Kac A P R	H3 5-17	H3K9me1	H3K14ac
188	149	112992	112240	112825	112686	394.888	16.7819	0.000324575	0.000322942	137597	140322	143038	140319	2720.5	17.0984	0.000604545	0.00107801	1.24522	0.316406	1.86257	0.897296	3.33811	1.73903		4	188	A149	Q T A R Kme2 S T G G Kme A P R	H3 5-17	H3K9me2	H3K14me1
189	150	116696	112317	117552	115522	2808.13	16.8178	0.00040246	0.000400435	144656	214638	150354	169883	38863.8	17.3742	0.00141275	0.00188583	1.47057	0.556375	3.51028	1.81158	4.70947	2.23556		4	189	A150	Q T A R Kme2 S T G G Kme2 A P R	H3 5-17	H3K9me2	H3K14me2
190	151	103962	104435	103221	103873	611.91	16.6645	8.25445e-05	8.2129e-05	127491	124323	117597	123137	5052.5	16.9099	0.000134829	0.000608521	1.18546	0.245448	1.63342	0.707891	7.40934	2.88934		4	190	A151	Q T A R Kme2 S T G G Kme3 A P R	H3 5-17	H3K9me2	H3K14me3
191	152	188572	181156	197985	189238	8434.22	17.5298	0.00242692	0.0024147	219450	231369	234382	228400	7896.26	17.8012	0.00301248	0.00348481	1.20695	0.271365	1.24128	0.311827	1.44316	0.529235		4	191	A152	Q T A R Kme2 S T G G Kac A P R	H3 5-17	H3K9me2	H3K14ac
192	153	115482	117991	118362	117278	1566.69	16.8396	0.000450704	0.000448435	148205	147794	145604	147201	1398.23	17.1674	0.000792683	0.00126606	1.25514	0.327851	1.75877	0.814565	2.82329	1.49738		4	192	A153	Q T A R Kme3 S T G G Kme A P R	H3 5-17	H3K9me3	H3K14me1
193	154	113997	115616	119607	116407	2887.37	16.8288	0.000426765	0.000424617	155513	152443	147976	151977	3790.02	17.2135	0.000923257	0.00139658	1.30557	0.384682	2.16338	1.11329	3.28902	1.71766		4	193	A154	Q T A R Kme3 S T G G Kme2 A P R	H3 5-17	H3K9me3	H3K14me2
194	155	129442	122923	123157	125174	3698.05	16.9336	0.000667542	0.000664182	149468	150479	141737	147228	4782.14	17.1677	0.000793421	0.0012668	1.17619	0.234117	1.18857	0.249228	1.90731	0.93154		4	194	A155	Q T A R Kme3 S T G G Kme3 A P R	H3 5-17	H3K9me3	H3K14me3
195	156	178798	178844	181134	179592	1335.61	17.4544	0.00216202	0.00215114	169205	180802	184245	178084	7879.79	17.4422	0.00163695	0.00210993	0.991603	-0.0121652	0.75714	-0.401368	0.980845	-0.0279033		4	195	A156	Q T A R Kme3 S T G G Kac A P R	H3 5-17	H3K9me3	H3K14ac
196	157	461437	446078	434551	447355	13488.4	18.7711	0.00951559	0.00946769	480687	509384	479215	489762	17009.1	18.9017	0.0101575	0.0106264	1.09479	0.13066	1.06746	0.0941804	1.12239	0.166574		4	196	A157	Q T A R Kac S T G G Kme A P R	H3 5-17	H3K9ac	H3K14me1
197	158	311047	348391	329649	329696	18672	18.3308	0.00628431	0.00625268	374930	408159	414733	399274	21337.2	18.607	0.00768377	0.00815389	1.21104	0.276244	1.22269	0.29006	1.30406	0.383014		4	197	A158	Q T A R Kac S T G G Kme2 A P R	H3 5-17	H3K9ac	H3K14me2
198	159	327172	312563	307402	315712	10254.4	18.2683	0.00590029	0.00587059	336861	370421	391063	366115	27356.4	18.4819	0.00677728	0.00724783	1.15965	0.213686	1.14864	0.199922	1.2346	0.304043		4	198	A159	Q T A R Kac S T G G Kme3 A P R	H3 5-17	H3K9ac	H3K14me3
199	160	637680	602962	647431	629358	23373.5	19.2635	0.0145139	0.0144409	786751	574722	550301	637258	130039	19.2815	0.0141897	0.0146567	1.01255	0.0179974	0.977662	-0.0325925	1.01495	0.021407		4	199	A160	Q T A R Kac S T G G Kac A P R	H3 5-17	H3K9ac	H3K14ac
200	161	154827	147645	148148	150207	4009.22	17.1966	0.00135501	0.00134819	158163	169821	170421	166135	6910.47	17.342	0.00131029	0.00178343	1.10604	0.145407	0.966998	-0.0484154	1.32283	0.403628		4	200	A161	T G G K A P R K Q L A T K	H3 11-23
201	162	119473	123773	125173	122806	2970.41	16.906	0.000602519	0.000599486	148467	161525	160330	156774	7218.84	17.2583	0.00105439	0.00152764	1.2766	0.352301	1.74996	0.807326	2.54825	1.34951		4	201	A162	T G G Kme A P R K Q L A T K	H3 11-23	H3K14me1
202	163	104616	108650	106263	106510	2028.28	16.7006	0.000154964	0.000154184	134446	133939	132170	133518	1194.89	17.0267	0.000418631	0.000892188	1.25358	0.326053	2.70147	1.43374	5.78651	2.53269		4	202	A163	T G G Kme2 A P R K Q L A T K	H3 11-23	H3K14me2
203	164	122006	119274	122415	121232	1707.68	16.8874	0.000559274	0.000556459	141577	142043	132069	138563	5628.79	17.0802	0.00055654	0.00103003	1.14296	0.192775	0.995112	-0.00706871	1.85105	0.888343		4	203	A164	T G G Kme3 A P R K Q L A T K	H3 11-23	H3K14me3
204	165	327940	343294	360100	343778	16085.5	18.3911	0.00667105	0.00663747	328374	305608	430595	354859	66569.7	18.4369	0.00646957	0.00694026	1.03223	0.0457687	0.969797	-0.0442449	1.04562	0.0643552		4	204	A165	T G G Kac A P R K Q L A T K	H3 11-23	H3K14ac
205	166	116745	113378	114195	114773	1756.26	16.8084	0.000381891	0.000379968	142704	138244	139770	140239	2266.74	17.0975	0.000602367	0.00107584	1.22189	0.289112	1.57733	0.657484	2.83139	1.50151		4	205	A166	T G G K A P Rme K Q L A T K	H3 11-23	H3R17me1
206	167	108638	109692	111858	110063	1641.69	16.748	0.00025254	0.000251269	136882	143427	139341	139883	3306.03	17.0939	0.000592635	0.00106611	1.27094	0.345899	2.3467	1.23063	4.2429	2.08505		4	206	A167	T G G K A P Rme2a K Q L A T K	H3 11-23	H3R17me2a
207	168	102701	104051	102012	102921	1037.2	16.6512	5.6418e-05	5.61341e-05	125558	121164	120981	122568	2591.32	16.9032	0.000119265	0.000592965	1.19089	0.252036	2.11395	1.07994	10.5634	3.401		4	207	A168	T G G K A P Rme2s K Q L A T K	H3 11-23	H3R17me2s
208	169	103323	100891	101265	101826	1309.57	16.6358	2.63461e-05	2.62135e-05	118859	127355	127354	124523	4904.88	16.926	0.00017271	0.000646384	1.22289	0.290298	6.55543	2.71269	24.6584	4.62401		4	208	A169	T G G K A P Rcit K Q L A T K	H3 11-23	H3R17cit
209	170	114920	116775	120548	117414	2867.95	16.8412	0.000454439	0.000452151	140268	148381	140645	143098	4579.09	17.1266	0.000680516	0.00115395	1.21874	0.285395	1.49749	0.582545	2.55213	1.3517		4	209	A170	T G G K A P R Kme Q L A T K	H3 11-23	H3K18me1
210	171	157123	100832	103354	120436	31796.6	16.8779	0.000537432	0.000534726	128492	131005	135554	131684	3579.58	17.0067	0.000368475	0.000842057	1.09339	0.128806	0.685623	-0.544513	1.57474	0.655116		4	210	A171	T G G K A P R Kme2 Q L A T K	H3 11-23	H3K18me2
211	172	121522	122167	117320	120336	2632.05	16.8767	0.000534685	0.000531994	151456	168495	160947	160299	8537.94	17.2904	0.00115076	0.00162397	1.33209	0.413696	2.15222	1.10583	3.05261	1.61004		4	211	A172	T G G K A P R Kme3 Q L A T K	H3 11-23	H3K18me3
212	173	275806	352898	380414	336373	54226.6	18.3597	0.00646768	0.00643512	436188	360133	322786	373036	57791.5	18.509	0.00696648	0.00743693	1.109	0.149253	1.07712	0.107181	1.15568	0.208739		4	212	A173	T G G K A P R Kac Q L A T K	H3 11-23	H3K18ac
213	174	126260	124543	134191	128331	5146.73	16.9695	0.000754251	0.000750455	153001	186919	154893	164938	19059.9	17.3316	0.00127756	0.00175071	1.28525	0.362047	1.69381	0.760276	2.33287	1.2221		4	213	A174	T G G K A P R K Q L A T K	H3 11-23
214	175	117938	122318	121863	120706	2408.22	16.8811	0.000544847	0.000542104	150439	157777	156573	154930	3935.35	17.2413	0.00100397	0.00147725	1.28353	0.360112	1.84266	0.88179	2.72502	1.44627		4	214	A175	T G G K A P R K Q L A T K	H3 11-23
215	176	109188	107090	105464	107247	1866.98	16.7106	0.000175223	0.000174341	137449	138952	135664	137355	1646.01	17.0675	0.000523516	0.000997024	1.28073	0.356968	2.98772	1.57904	5.71882	2.51572		4	215	A176	T G G Kme A P Rme K Q L A T K	H3 11-23	H3K14me1	H3R17me1
216	177	208930	165115	177868	183971	22536	17.4891	0.00228228	0.00227079	163757	187957	158449	170054	15729.7	17.3756	0.00141744	0.00189052	0.924354	-0.113483	0.621063	-0.687189	0.832539	-0.26441		4	216	A177	T G G Kme A P Rme2a K Q L A T K	H3 11-23	H3K14me1	H3R17me2a
217	178	134910	141228	134391	136843	3806.38	17.0622	0.000988007	0.000983034	152085	155762	170803	159550	9917.29	17.2836	0.00113028	0.0016035	1.16593	0.221487	1.144	0.194082	1.63117	0.705908		4	217	A178	T G G Kme A P Rme2s K Q L A T K	H3 11-23	H3K14me1	H3R17me2s
218	179	130171	122804	125308	126094	3745.92	16.9441	0.000692817	0.00068933	146532	146167	193396	162032	27162.9	17.3059	0.00119812	0.00167131	1.285	0.361772	1.72934	0.790225	2.42454	1.27771		4	218	A179	T G G Kme A P Rcit K Q L A T K	H3 11-23	H3K14me1	H3R17cit
219	180	139355	147697	141075	142709	4404.51	17.1227	0.0011491	0.00114332	180302	180736	185340	182126	2791.85	17.4746	0.00174745	0.00222038	1.27621	0.351861	1.52071	0.604742	1.94204	0.957576		4	219	A180	T G G Kme2 A P Rme K Q L A T K	H3 11-23	H3K14me2	H3R17me1
220	181	151710	144030	153631	149790	5080.22	17.1926	0.00134358	0.00133682	200001	188771	191494	193422	5858	17.5614	0.00205626	0.00252904	1.29128	0.368807	1.53043	0.61394	1.89184	0.919788		4	220	A181	T G G Kme2 A P Rme2a K Q L A T K	H3 11-23	H3K14me2	H3R17me2a
221	182	103821	105316	103602	104246	932.808	16.6696	9.28064e-05	9.23393e-05	126018	128212	127706	127312	1148.84	16.958	0.000248964	0.000722602	1.22126	0.288372	2.68262	1.42364	7.82551	2.96818		4	221	A182	T G G Kme2 A P Rme2s K Q L A T K	H3 11-23	H3K14me2	H3R17me2s
222	183	103794	108664	105289	105916	2494.75	16.6926	0.000138651	0.000137953	130269	135218	138493	134660	4140.3	17.039	0.000449841	0.000923384	1.27139	0.346405	3.24441	1.69796	6.69345	2.74275		4	222	A183	T G G Kme2 A P Rcit K Q L A T K	H3 11-23	H3K14me2	H3R17cit
223	BLANK-4	116387	106155	113118	111887	5225.95	16.7717	0.000302633	0.000301109	128826	134537	135425	132929	3581.22	17.0203	0.000402529	0.000876094	1.18807	0.248621	1.33009	0.411525	2.90956	1.5408		4	223			BLANK-4
224	926	1709172	1694530	1353390	1.5857e+06	201317	20.5967	0.0407778	0.0405726	2096830	2062015	1979731	2046192	60131.7	20.9645	0.0527067	0.0531554	1.29041	0.367824	1.29253	0.370201	1.31013	0.389713		4	224	926	10% Kac G Kac G Kac G Kac G Kac G Kac G Kac	POSCTRL-4
225	184	106783	105322	104227	105444	1282.36	16.6861	0.000125698	0.000125065	125235	127984	125945	126388	1427.04	16.9475	0.000223704	0.000697354	1.19863	0.261382	1.7797	0.831631	5.57592	2.47921		5	225	A184	T G G Kme3 A P Rme K Q L A T K	H3 11-23	H3K14me3	H3R17me1
226	185	132279	150853	177682	153605	22826.2	17.2289	0.00144833	0.00144104	188461	185835	184132	186143	2180.84	17.506	0.00185726	0.00233013	1.21183	0.277187	1.28234	0.358782	1.61698	0.6933		5	226	A185	T G G Kme3 A P Rme2a K Q L A T K	H3 11-23	H3K14me3	H3R17me2a
227	186	109994	120807	118670	116490	5726.56	16.8299	0.000429063	0.000426903	130041	128717	131609	130122	1447.71	16.9895	0.000325792	0.000799394	1.11702	0.159658	0.759311	-0.397237	1.87254	0.904997		5	227	A186	T G G Kme3 A P Rme2s K Q L A T K	H3 11-23	H3K14me3	H3R17me2s
228	187	126015	125006	123297	124773	1373.94	16.9289	0.00065652	0.000653215	140537	142126	144549	142404	2020.4	17.1196	0.000661544	0.00113499	1.14131	0.190688	1.00765	0.0109984	1.73754	0.797044		5	228	A187	T G G Kme3 A P Rcit K Q L A T K	H3 11-23	H3K14me3	H3R17cit
229	188	669977	295134	294393	419835	216630	18.6795	0.00875979	0.0087157	668794	629382	708312	668829	39465	19.3513	0.0150528	0.0155194	1.59308	0.671817	1.7184	0.781062	1.78063	0.832385		5	229	A188	T G G Kac A P Rme K Q L A T K	H3 11-23	H3K14ac	H3R17me1
230	189	433601	382468	650068	488712	142058	18.8986	0.0106514	0.0105978	961598	956362	920973	946311	22099	19.852	0.0226385	0.0231015	1.93634	0.953329	2.1254	1.08774	2.17985	1.12423		5	230	A189	T G G Kac A P Rme2a K Q L A T K	H3 11-23	H3K14ac	H3R17me2a
231	190	505026	376794	427945	436588	64551.5	18.7359	0.0092199	0.00917349	543500	565750	554304	554518	11126.5	19.0809	0.0119278	0.0123959	1.27012	0.344961	1.2937	0.371503	1.35127	0.434319		5	231	A190	T G G Kac A P Rme2s K Q L A T K	H3 11-23	H3K14ac	H3R17me2s
232	191	1226084	1187242	1170722	1.19468e+06	28421.1	20.1882	0.0300394	0.0298882	1307679	1519570	1400417	1409222	106220	20.4265	0.0352934	0.0357504	1.17958	0.238271	1.1749	0.232542	1.19614	0.258384		5	232	A191	T G G Kac A P Rcit K Q L A T K	H3 11-23	H3K14ac	H3R17cit
233	192	133028	128115	108531	123225	12960	16.9109	0.000614007	0.000610917	148247	152879	143570	148232	4654.52	17.1775	0.000820868	0.00129424	1.20294	0.266566	1.3369	0.418894	2.11851	1.08305		5	233	A192	T G G Kme A P R Kme Q L A T K	H3 11-23	H3K14me1	H3K18me1
234	193	132007	135783	144631	137474	6479.59	17.0688	0.00100533	0.00100027	155877	169746	163004	162876	6935.39	17.3134	0.00122119	0.00169437	1.18478	0.244616	1.21472	0.280625	1.69392	0.760363		5	234	193	T G G Kme A P R Kme2 Q L A T K	H3 11-23	H3K14me1	H3K18me2
235	194	227066	151202	140395	172888	47229.9	17.3995	0.0019779	0.00196794	158353	164153	158993	160500	3180.02	17.2922	0.00115624	0.00162945	0.928347	-0.107265	0.584578	-0.774532	0.827994	-0.272308		5	235	194	T G G Kme A P R Kme3 Q L A T K	H3 11-23	H3K14me1	H3K18me3
236	195	616809	634829	654772	635470	18989.6	19.2775	0.0146818	0.0146079	629917	648478	604999	627798	21816.8	19.2599	0.0139311	0.0143982	0.987927	-0.0175236	0.948869	-0.0757188	0.985649	-0.0208539		5	236	195	T G G Kme A P R Kac Q L A T K	H3 11-23	H3K14me1	H3K18ac
237	196	135337	137979	132247	135188	2868.92	17.0446	0.000942547	0.000937802	155675	150427	154422	153508	2740.79	17.228	0.000965102	0.0014384	1.13552	0.18335	1.02393	0.0341169	1.5338	0.617109		5	237	196	T G G Kme2 A P R Kme Q L A T K	H3 11-23	H3K14me2	H3K18me1
238	197	119001	117689	135313	124001	9818.42	16.92	0.000635328	0.00063213	149195	154355	201637	168396	28903.2	17.3615	0.0013721	0.0018452	1.35802	0.441503	2.15967	1.11081	2.91902	1.54549		5	238	197	T G G Kme2 A P R Kme2 Q L A T K	H3 11-23	H3K14me2	H3K18me2
239	198	131110	131312	137751	133391	3777.22	17.0253	0.000893205	0.000888709	140972	140500	146716	142729	3460.61	17.1229	0.000670438	0.00114388	1.07001	0.0976205	0.750598	-0.413887	1.28712	0.364148		5	239	198	T G G Kme2 A P R Kme3 Q L A T K	H3 11-23	H3K14me2	H3K18me3
240	199	521976	502434	508139	510850	10049	18.9625	0.0112593	0.0112027	502331	471199	455181	476237	23975.3	18.8613	0.00978776	0.0102569	0.932245	-0.101219	0.869302	-0.202071	0.915575	-0.12725		5	240	199	T G G Kme2 A P R Kac Q L A T K	H3 11-23	H3K14me2	H3K18ac
241	200	128263	136441	138576	134427	5443.59	17.0365	0.000921647	0.000917008	149279	154944	146741	150321	4199.66	17.1977	0.000877986	0.00135133	1.11824	0.16123	0.952626	-0.0700175	1.47362	0.559369		5	241	200	T G G Kme3 A P R Kme Q L A T K	H3 11-23	H3K14me3	H3K18me1
242	201	145552	115050	126280	128961	15426.7	16.9766	0.000771535	0.000767651	149352	137062	142331	142915	6165.78	17.1248	0.000675514	0.00114895	1.10821	0.148226	0.875545	-0.191746	1.49671	0.581792		5	242	201	T G G Kme3 A P R Kme2 Q L A T K	H3 11-23	H3K14me3	H3K18me2
243	202	123948	125216	131316	126827	3939.23	16.9525	0.000712929	0.00070934	134191	136765	137202	136053	1626.99	17.0538	0.000487914	0.000961438	1.07274	0.101307	0.684379	-0.547133	1.3554	0.438716		5	243	202	T G G Kme3 A P R Kme3 Q L A T K	H3 11-23	H3K14me3	H3K18me3
244	203	284608	316420	232368	277799	42437.7	18.0837	0.00485906	0.00483461	232902	245124	225157	234394	10066.8	17.8386	0.00317635	0.0036486	0.843756	-0.245102	0.653695	-0.613311	0.754683	-0.406057		5	244	203	T G G Kme3 A P R Kac Q L A T K	H3 11-23	H3K14me3	H3K18ac
245	204	975053	938008	1095386	1.00282e+06	82280.2	19.9356	0.0247702	0.0246455	984139	907919	879793	923950	53988.7	19.8175	0.0220272	0.0224905	0.921356	-0.118169	0.889263	-0.169318	0.912561	-0.132007		5	245	204	T G G Kac A P R Kme Q L A T K	H3 11-23	H3K14ac	H3K18me1
246	205	1670757	1658592	898739	1.40936e+06	442255	20.4266	0.0359351	0.0357543	1630362	1494202	1427701	1.51742e+06	103307	20.5332	0.0382513	0.038707	1.07667	0.106579	1.06445	0.0901139	1.08258	0.114477		5	246	205	T G G Kac A P R Kme2 Q L A T K	H3 11-23	H3K14ac	H3K18me2
247	206	1107708	1121592	1122705	1117335	8355.78	20.0916	0.0279152	0.0277747	1180776	1284640	1230867	1.23209e+06	51942.9	20.2327	0.0304511	0.0309105	1.10271	0.141051	1.09084	0.125445	1.1129	0.154324		5	247	206	T G G Kac A P R Kme3 Q L A T K	H3 11-23	H3K14ac	H3K18me3
248	207	5049229	4831397	5269042	5.04989e+06	218823	22.2678	0.135915	0.135231	5730835	5427645	5232134	5463538	251281	22.3814	0.146129	0.146533	1.08191	0.113584	1.07515	0.10454	1.08358	0.115808		5	248	207	T G G Kac A P R Kac Q L A T K	H3 11-23	H3K14ac	H3K18ac
249	208	215666	244021	212083	223923	17497	17.7726	0.00337949	0.00336248	228870	212264	234293	225142	11477.8	17.7805	0.00292342	0.00339579	1.00544	0.00783248	0.865047	-0.20915	1.00991	0.0142211		5	249	208	T G G K A P Rme Kme Q L A T K	H3 11-23	H3R17me1	H3K18me1
250	209	153727	174654	198502	175628	22403.4	17.4222	0.00205315	0.00204281	169756	183162	179250	177389	6893.97	17.4366	0.00161796	0.00209095	1.01003	0.0143991	0.788039	-0.34366	1.02356	0.0336014		5	250	209	T G G K A P Rme Kme2 Q L A T K	H3 11-23	H3R17me1	H3K18me2
251	210	136938	146717	153397	145684	8277.98	17.1525	0.00123081	0.00122461	156245	165301	169283	163610	6681.53	17.3199	0.00124126	0.00171443	1.12304	0.167416	1.00849	0.0121982	1.39997	0.485401		5	251	210	T G G K A P Rme Kme3 Q L A T K	H3 11-23	H3R17me1	H3K18me3
252	211	402052	412050	457507	423870	29556.6	18.6933	0.0088706	0.00882596	448134	434867	482412	455138	24534.1	18.7959	0.00921095	0.00968034	1.07377	0.102682	1.03837	0.0543179	1.0968	0.133306		5	252	211	T G G K A P Rme Kac Q L A T K	H3 11-23	H3R17me1	H3K18ac
253	212	170659	157119	152299	160026	9518.87	17.2879	0.00162467	0.00161649	188881	176157	175724	180254	7474.34	17.4597	0.00169627	0.00216923	1.12641	0.171728	1.04407	0.0622221	1.34193	0.424313		5	253	212	T G G K A P Rme2a Kme Q L A T K	H3 11-23	H3R17me2a	H3K18me1
254	213	114800	112078	116917	114598	2425.8	16.8062	0.000377103	0.000375205	129042	135790	142526	135786	6742	17.051	0.000480623	0.000954152	1.18489	0.244749	1.27452	0.349949	2.54302	1.34654		5	254	213	T G G K A P Rme2a Kme2 Q L A T K	H3 11-23	H3R17me2a	H3K18me2
255	214	121370	117278	118211	118953	2144.54	16.86	0.000496695	0.000494195	145535	137263	130444	137747	7557.15	17.0717	0.000534242	0.00100774	1.158	0.211633	1.07559	0.105133	2.03916	1.02798		5	255	214	T G G K A P Rme2a Kme3 Q L A T K	H3 11-23	H3R17me2a	H3K18me3
256	215	162427	163970	166333	164243	1967.29	17.3255	0.0017405	0.00173174	174093	177991	173128	175071	2574.7	17.4176	0.00155457	0.00202759	1.06592	0.0921026	0.893177	-0.162983	1.17084	0.227546		5	256	215	T G G K A P Rme2a Kac Q L A T K	H3 11-23	H3R17me2a	H3K18ac
257	216	122453	115379	114221	117351	4456.24	16.8405	0.000452699	0.000450421	132075	136902	133208	134062	2524.19	17.0325	0.000433484	0.000907035	1.1424	0.192067	0.957555	-0.0625732	2.01375	1.00989		5	257	216	T G G K A P Rme2s Kme Q L A T K	H3 11-23	H3R17me2s	H3K18me1
258	217	109978	109612	108887	109492	555.257	16.7405	0.000236877	0.000235685	124240	125307	127312	125620	1559.68	16.9387	0.0002027	0.00067636	1.14729	0.198232	0.855717	-0.224795	2.86976	1.52093		5	258	217	T G G K A P Rme2s Kme2 Q L A T K	H3 11-23	H3R17me2s	H3K18me2
259	218	110630	110418	113047	111365	1460.51	16.7649	0.000288306	0.000286855	142913	135784	121593	133430	10853.2	17.0257	0.000416216	0.000889775	1.19813	0.260787	1.44366	0.529731	3.10183	1.63312		5	259	218	T G G K A P Rme2s Kme3 Q L A T K	H3 11-23	H3R17me2s	H3K18me3
260	219	241245	247488	260701	249811	9933.9	17.9305	0.00409045	0.00406986	269731	241914	258482	256709	13993	17.9698	0.00378638	0.00425834	1.02761	0.0392949	0.925662	-0.111442	1.04631	0.0653109		5	260	219	T G G K A P Rme2s Kac Q L A T K	H3 11-23	H3R17me2s	H3K18ac
261	220	167480	177287	158069	167612	9609.68	17.3548	0.00183301	0.00182379	188033	195952	188230	190738	4516.24	17.5412	0.00198289	0.00245571	1.13798	0.186469	1.08177	0.113388	1.34649	0.429201		5	261	220	T G G K A P Rcit Kme Q L A T K	H3 11-23	H3R17cit	H3K18me1
262	221	126438	124969	124363	125257	1066.99	16.9345	0.000669812	0.000666441	148669	147501	150310	148827	1411.12	17.1833	0.000837125	0.00131048	1.18817	0.248746	1.24979	0.321686	1.96639	0.975552		5	262	221	T G G K A P Rcit Kme2 Q L A T K	H3 11-23	H3R17cit	H3K18me2
263	222	121947	115635	121703	119762	3575.88	16.8698	0.000518903	0.000516291	141879	140233	145112	142408	2482.14	17.1197	0.000661654	0.0011351	1.1891	0.249864	1.2751	0.35061	2.19856	1.13656		5	263	222	T G G K A P Rcit Kme3 Q L A T K	H3 11-23	H3R17cit	H3K18me3
264	223	1037112	1019444	1018178	1.02491e+06	10585	19.9671	0.025377	0.0252492	853945	1000740	1025627	960104	92774.7	19.8728	0.0230156	0.0234784	0.936768	-0.0942365	0.906946	-0.140911	0.929866	-0.104906		5	264	223	T G G K A P Rcit Kac Q L A T K	H3 11-23	H3R17cit	H3K18ac
265	224	121320	122404	127075	123600	3058.14	16.9153	0.000624306	0.000621164	191709	181447	145678	172945	24164.7	17.4	0.00149645	0.0019695	1.39923	0.484636	2.39699	1.26122	3.17066	1.66479		5	265	224	L A T K A A R K S A P A T	H3 20-32
266	225	142109	140179	132508	138265	5078.52	17.0771	0.00102707	0.0010219	170543	157339	156366	161416	7919.17	17.3004	0.00118129	0.00165448	1.16744	0.223344	1.15015	0.201828	1.61903	0.695129		5	266	225	L A Tph K A A R K S A P A T	H3 20-32	H3T22ph
267	226	128114	127574	129183	128290	818.865	16.9691	0.000753126	0.000749335	146993	155617	151030	151213	4314.92	17.2062	0.000902371	0.0013757	1.17868	0.237173	1.19817	0.26083	1.83589	0.876483		5	267	226	L A T Kme A A R K S A P A T	H3 20-32	H3K23me1
268	227	129909	137005	141012	135975	5622.66	17.053	0.000964178	0.000959325	165151	155335	166842	162443	6213.22	17.3096	0.00120935	0.00168254	1.19465	0.256586	1.25429	0.326865	1.75388	0.810547		5	268	227	L A T Kme2 A A R K S A P A T	H3 20-32	H3K23me2
269	228	121845	111684	114266	115932	5281.32	16.8229	0.00041372	0.000411638	141130	132954	136062	136715	4126.97	17.0608	0.000506029	0.000979545	1.17928	0.2379	1.22312	0.290566	2.37963	1.25074		5	269	228	L A T Kme3 A A R K S A P A T	H3 20-32	H3K23me3
270	229	152029	152904	143229	149387	5351.19	17.1887	0.00133251	0.0013258	173329	174910	175818	174686	1259.57	17.4144	0.00154405	0.00201707	1.16935	0.225703	1.15875	0.212571	1.5214	0.605396		5	270	229	L A T Kac A A R K S A P A T	H3 20-32	H3K23ac
271	230	113658	115525	111500	113561	2014.25	16.7931	0.000348615	0.00034686	140024	154098	142177	145433	7580.93	17.15	0.00074435	0.00121775	1.28066	0.356887	2.13517	1.09435	3.51079	1.8118		5	271	230	L A T K A A Rme K S A P A T	H3 20-32	H3R26me1
272	231	115406	118737	110462	114868	4163.62	16.8096	0.000384518	0.000382582	147882	156167	139493	147847	8337.05	17.1737	0.000810352	0.00128372	1.2871	0.364127	2.10745	1.0755	3.35542	1.74649		5	272	231	L A T K A A Rme2a K S A P A T	H3 20-32	H3R26me2a
273	232	117753	120782	116653	118396	2138.28	16.8533	0.000481398	0.000478975	136700	163884	133071	144552	16840.3	17.1412	0.000720256	0.00119367	1.22092	0.287965	1.49618	0.58128	2.49214	1.31738		5	273	232	L A T K A A Rme2s K S A P A T	H3 20-32	H3R26me2s
274	233	132643	146963	127279	135628	10175.9	17.0493	0.000954649	0.000949843	160561	175982	158748	165097	9470.17	17.333	0.00128192	0.00175507	1.21728	0.283655	1.34282	0.425262	1.84774	0.885764		5	274	233	L A T K A A Rcit K S A P A T	H3 20-32	H3R26cit
275	234	134216	131790	136721	134242	2465.61	17.0345	0.000916585	0.000911971	153594	159164	158205	156988	2977.86	17.2603	0.00106023	0.00153348	1.16943	0.225812	1.15671	0.210033	1.6815	0.74975		5	275	234	L A T K A A R Kme S A P A T	H3 20-32	H3K27me1
276	235	117014	119967	120268	119083	1798.12	16.8616	0.000500265	0.000497747	147019	150940	149332	149097	1971.04	17.1859	0.000844515	0.00131787	1.25204	0.324284	1.68814	0.755431	2.64767	1.40472		5	276	235	L A T K A A R Kme2 S A P A T	H3 20-32	H3K27me2
277	236	129503	132302	137176	132994	3882.98	17.021	0.000882293	0.000877852	157443	160254	164752	160816	3686.81	17.2951	0.00116489	0.0016381	1.2092	0.274056	1.3203	0.40087	1.86603	0.899972		5	277	236	L A T K A A R Kme3 S A P A T	H3 20-32	H3K27me3
278	237	296403	290935	299163	295500	4187.61	18.1728	0.0053452	0.0053183	295075	296516	317557	303049	12584.6	18.2092	0.00505321	0.00552457	1.02555	0.0363929	0.945373	-0.0810443	1.03879	0.0548981		5	278	237	L A T K A A R Kac S A P A T	H3 20-32	H3K27ac
279	BLANK-5	146705	149076	150563	148781	1945.81	17.1828	0.00131587	0.00130925	171440	158562	155258	161753	8550.01	17.3034	0.00119051	0.0016637	1.08719	0.120602	0.904733	-0.144436	1.27073	0.345661		5	279			BLANK-5
280	481	247540	239939	222905	236795	12614.9	17.8533	0.00373297	0.00371418	285398	268605	241831	265278	21973.2	18.0171	0.00402063	0.00449248	1.12029	0.163868	1.07706	0.107097	1.20955	0.274468		5	280	481	5% S G Rme G K G G K G L G K G	NEGCTRL-5
281	238	123253	126259	121099	123537	2591.7	16.9146	0.000622585	0.000619451	152954	155616	156306	154959	1770.04	17.2415	0.00100476	0.00147804	1.25435	0.32694	1.61385	0.690507	2.38605	1.25462		6	281	238	L A T K A A R K Sph A P A T	H3 20-32	H3S28ph
282	239	129041	130148	132117	130435	1558	16.993	0.000812034	0.000807946	170809	166195	163901	166968	3518.33	17.3492	0.00133308	0.0018062	1.28009	0.35624	1.64165	0.715147	2.23554	1.16063		6	282	239	L A Tph Kme A A R K S A P A T	H3 20-32	H3T22ph	H3K23me1
283	240	124837	130484	124799	126707	3271.32	16.9511	0.000709633	0.000706061	156345	155497	150961	154268	2894.88	17.2351	0.000985869	0.00145916	1.21752	0.283943	1.38927	0.474322	2.06662	1.04727		6	283	240	L A Tph Kme2 A A R K S A P A T	H3 20-32	H3T22ph	H3K23me2
284	241	121410	129107	124586	125034	3868.04	16.932	0.000663706	0.000660365	149023	148648	150215	149295	818.228	17.1878	0.000849937	0.00132329	1.19403	0.255845	1.28059	0.356811	2.00388	1.00279		6	284	241	L A Tph Kme3 A A R K S A P A T	H3 20-32	H3T22ph	H3K23me3
285	242	841387	799144	763873	801468	38809.2	19.6123	0.0192406	0.0191437	929153	824307	974516	909325	77042.4	19.7944	0.0216274	0.0220909	1.13457	0.182152	1.12405	0.168708	1.15395	0.20658		6	285	242	L A Tph Kac A A R K S A P A T	H3 20-32	H3T22ph	H3K23ac
286	243	127682	123880	130520	127361	3331.64	16.9586	0.000727594	0.000723932	158840	161754	165768	162121	3478.52	17.3067	0.00120055	0.00167374	1.27293	0.348148	1.65003	0.722492	2.31201	1.20915		6	286	243	L A T K A A Rme Kme S A P A T	H3 20-32	H3R26me1	H3K27me1
287	244	122726	123689	125734	124050	1536.09	16.9206	0.000636664	0.00063346	152392	152021	148161	150858	2343.03	17.2028	0.000892657	0.00136599	1.21611	0.282273	1.40208	0.487573	2.1564	1.10862		6	287	244	L A T K A A Rme Kme2 S A P A T	H3 20-32	H3R26me1	H3K27me2
288	245	132244	134742	139867	135618	3886.21	17.0492	0.000954356	0.000949552	161258	162083	155606	159649	3525.56	17.2845	0.00113298	0.0016062	1.1772	0.235358	1.18717	0.247526	1.69154	0.758334		6	288	245	L A T K A A Rme Kme3 S A P A T	H3 20-32	H3R26me1	H3K27me3
289	246	1039869	996378	932371	989539	54074.3	19.9164	0.0244056	0.0242827	704635	699446	799291	734457	56207.5	19.4863	0.0168469	0.0173127	0.742221	-0.430078	0.690289	-0.534727	0.712963	-0.488101		6	289	246	L A T K A A Rme Kac S A P A T	H3 20-32	H3R26me1	H3K27ac
290	247	126994	125708	133901	128868	4406.16	16.9755	0.000768981	0.00076511	167128	159988	161734	162950	3722.08	17.3141	0.00122322	0.0016964	1.26448	0.338539	1.59071	0.669669	2.2172	1.14874		6	290	247	L A T K A A Rme2a Kme S A P A T	H3 20-32	H3R26me2a	H3K27me1
291	248	115887	114526	116044	115486	834.795	16.8174	0.000401472	0.000399451	153295	147437	146024	148919	3855.3	17.1842	0.00083964	0.001313	1.2895	0.366811	2.09141	1.06447	3.28701	1.71677		6	291	248	L A T K A A Rme2a Kme2 S A P A T	H3 20-32	H3R26me2a	H3K27me2
292	249	113559	112561	116047	114056	1795.29	16.7994	0.0003622	0.000360377	138331	142396	146290	142339	3979.81	17.119	0.000659767	0.00113321	1.24798	0.319593	1.82156	0.865172	3.14452	1.65284		6	292	249	L A T K A A Rme2a Kme3 S A P A T	H3 20-32	H3R26me2a	H3K27me3
293	250	365669	373317	372246	370411	4141.17	18.4988	0.00740246	0.0073652	373651	384865	400055	386190	13251.8	18.559	0.00732609	0.00779638	1.0426	0.0601864	0.989683	-0.0149613	1.05854	0.0820787		6	293	250	L A T K A A Rme2a Kac S A P A T	H3 20-32	H3R26me2a	H3K27ac
294	251	113211	114519	114837	114189	861.768	16.8011	0.000365861	0.00036402	142779	148630	151420	147610	4409.94	17.1714	0.000803855	0.00127723	1.29268	0.370364	2.19716	1.13564	3.50868	1.81093		6	294	251	L A T K A A Rme2s Kme S A P A T	H3 20-32	H3R26me2s	H3K27me1
295	252	109609	115035	113269	112638	2767.55	16.7813	0.000323257	0.00032163	142548	143070	141428	142349	838.953	17.1191	0.000660031	0.00113347	1.26377	0.33774	2.04182	1.02985	3.52416	1.81728		6	295	252	L A T K A A Rme2s Kme2 S A P A T	H3 20-32	H3R26me2s	H3K27me2
296	253	115916	114562	120302	116927	3000.5	16.8352	0.000441046	0.000438826	143347	138699	140053	140700	2390.52	17.1023	0.000614952	0.00108842	1.20332	0.267015	1.3943	0.479545	2.48029	1.31051		6	296	253	L A T K A A Rme2s Kme3 S A P A T	H3 20-32	H3R26me2s	H3K27me3
297	254	407398	396588	400639	401542	5461.24	18.6152	0.00825741	0.00821585	435682	441584	422846	433371	9580.44	18.7252	0.00861589	0.00908557	1.07927	0.110052	1.04341	0.0613107	1.10586	0.145167		6	297	254	L A T K A A Rme2s Kac S A P A T	H3 20-32	H3R26me2s	H3K27ac
298	255	120994	111771	112357	115041	5164.06	16.8118	0.000389251	0.000387291	148703	138414	149723	145613	6255.63	17.1518	0.00074928	0.00122268	1.26576	0.339999	1.92493	0.944805	3.157	1.65856		6	298	255	L A T K A A Rcit Kme S A P A T	H3 20-32	H3R26cit	H3K27me1
299	256	112234	113496	113058	112929	640.763	16.7851	0.000331267	0.0003296	148517	147103	146769	147463	927.942	17.17	0.000799845	0.00127322	1.3058	0.384933	2.4145	1.27173	3.86293	1.9497		6	299	256	L A T K A A Rcit Kme2 S A P A T	H3 20-32	H3R26cit	H3K27me2
300	257	118133	120387	127362	121961	4811.54	16.8961	0.000579294	0.000576378	149038	156737	145094	150290	5921.56	17.1974	0.00087712	0.00135046	1.23228	0.30133	1.51412	0.598478	2.34301	1.22836		6	300	257	L A T K A A Rcit Kme3 S A P A T	H3 20-32	H3R26cit	H3K27me3
301	258	5511294	6090045	5510840	5.70406e+06	334273	22.4436	0.15388	0.153106	5769357	5812508	5358436	5646767	250632	22.429	0.151138	0.15154	0.989956	-0.014564	0.98218	-0.0259412	0.989775	-0.0148275		6	301	258	L A T K A A Rcit Kac S A P A T	H3 20-32	H3R26cit	H3K27ac
302	259	151440	140568	135835	142614	8001.23	17.1218	0.0011465	0.00114073	187805	176134	170418	178119	8861.83	17.4425	0.00163791	0.00211089	1.24896	0.320722	1.42861	0.514613	1.85047	0.887888		6	302	259	L A T Kme A A R Kme S A P A T	H3 20-32	H3K23me1	H3K27me1
303	260	114356	118075	119318	117250	2581.91	16.8392	0.000449916	0.000447652	147942	154640	155861	152814	4263.5	17.2214	0.000946138	0.00141945	1.30332	0.382196	2.10292	1.07239	3.17087	1.66488		6	303	260	L A T Kme A A R Kme2 S A P A T	H3 20-32	H3K23me1	H3K27me2
304	261	125922	128840	134369	129710	4290.23	16.9849	0.000792123	0.000788136	159486	162411	158418	160105	2067.22	17.2887	0.00114545	0.00161866	1.23433	0.303725	1.44605	0.532116	2.05378	1.03829		6	304	261	L A T Kme A A R Kme3 S A P A T	H3 20-32	H3K23me1	H3K27me3
305	262	820110	834139	833618	829289	7953.51	19.6615	0.0200046	0.0199039	769826	1221956	789182	926988	255633	19.8222	0.0221102	0.0225735	1.11781	0.160676	1.10526	0.144382	1.13412	0.181579		6	305	262	L A T Kme A A R Kac S A P A T	H3 20-32	H3K23me1	H3K27ac
306	263	130272	130052	209052	156459	45547.3	17.2554	0.00152671	0.00151903	165395	169302	177489	170729	6171.93	17.3813	0.00143587	0.00190895	1.09121	0.125924	0.940502	-0.0884973	1.25669	0.329632		6	306	263	L A T Kme2 A A R Kme S A P A T	H3 20-32	H3K23me2	H3K27me1
307	264	169970	158842	167533	165448	5849.57	17.336	0.00177359	0.00176467	180209	191216	190563	187329	6175.03	17.5152	0.0018897	0.00236256	1.13225	0.179196	1.06546	0.0914801	1.33881	0.420955		6	307	264	L A T Kme2 A A R Kme2 S A P A T	H3 20-32	H3K23me2	H3K27me2
308	265	120053	123642	123653	122449	2075.29	16.9018	0.000592714	0.000589731	152647	152451	153579	152892	602.692	17.2222	0.000948271	0.00142158	1.24862	0.320331	1.59988	0.677962	2.41055	1.26936		6	308	265	L A T Kme2 A A R Kme3 S A P A T	H3 20-32	H3K23me2	H3K27me3
309	266	1674897	1602630	1666542	1648023	39532.8	20.6523	0.0424895	0.0422756	1761831	1665189	1765200	1730740	56793.8	20.723	0.0440829	0.0445358	1.05019	0.0706526	1.0375	0.0531155	1.05346	0.0751409		6	309	266	L A T Kme2 A A R Kac S A P A T	H3 20-32	H3K23me2	H3K27ac
310	267	147629	145823	140215	144556	3866.06	17.1413	0.00119982	0.00119378	165893	168207	184043	172714	9878.9	17.398	0.00149016	0.00196321	1.19479	0.256763	1.24199	0.312648	1.64453	0.717676		6	310	267	L A T Kme3 A A R Kme S A P A T	H3 20-32	H3K23me3	H3K27me1
311	268	130454	134500	143289	136081	6561.93	17.0541	0.00096708	0.000962212	180993	164426	160327	168582	10941.9	17.3631	0.00137719	0.00185029	1.23884	0.308985	1.42407	0.51002	1.92296	0.943326		6	311	268	L A T Kme3 A A R Kme2 S A P A T	H3 20-32	H3K23me3	H3K27me2
312	269	154166	148646	150280	151031	2835.53	17.2045	0.00137764	0.00137071	173257	173789	173474	173507	267.5	17.4046	0.00151182	0.00198486	1.14882	0.20015	1.0974	0.134084	1.44805	0.534115		6	312	269	L A T Kme3 A A R Kme3 S A P A T	H3 20-32	H3K23me3	H3K27me3
313	270	1050676	1172662	1213528	1145622	84726.4	20.1277	0.028692	0.0285476	1147604	1434985	1111980	1231523	177101	20.232	0.0304355	0.0308949	1.07498	0.104312	1.06076	0.0851047	1.08222	0.113995		6	313	270	L A T Kme3 A A R Kac S A P A T	H3 20-32	H3K23me3	H3K27ac
314	271	316412	309366	318336	314705	4722.44	18.2636	0.00587261	0.00584305	313322	316314	319878	316505	3282.16	18.2719	0.00542105	0.00589224	1.00572	0.0082282	0.923107	-0.11543	1.00842	0.0120932		6	314	271	L A T Kac A A R Kme S A P A T	H3 20-32	H3K23ac	H3K27me1
315	272	947820	856723	785134	863226	81537.7	19.7194	0.0209366	0.0208312	868886	886783	749371	835013	74706.3	19.6714	0.0195959	0.0200603	0.967318	-0.0479385	0.935962	-0.0954788	0.962993	-0.0544022		6	315	272	L A T Kac A A R Kme2 S A P A T	H3 20-32	H3K23ac	H3K27me2
316	273	377836	431377	591165	466793	110987	18.8324	0.0100494	0.00999881	378176	395317	435367	402953	29350.3	18.6203	0.00778435	0.00825442	0.863238	-0.212169	0.774609	-0.36846	0.82554	-0.27659		6	316	273	L A T Kac A A R Kme3 S A P A T	H3 20-32	H3K23ac	H3K27me3
317	274	36859610	36507812	36173280	3.65136e+07	343201	25.1219	1	0.994967	36334426	37093532	36665364	36697774	380589	25.1292	1	1	1.00504	0.00725993	1	0	1.00506	0.00727999		6	317	274	L A T Kac A A R Kac S A P A T	H3 20-32	H3K23ac	H3K27ac
318	275	523488	467296	529172	506652	34201.6	18.9506	0.0111441	0.011088	630993	610711	597859	613188	16705.3	19.226	0.0135317	0.013999	1.21027	0.275334	1.21425	0.280066	1.26254	0.336332		6	318	275	L A T K A A R Kme Sph A P A T	H3 20-32	H3K27me1	H3S28ph
319	276	208381	193294	189339	197005	10048.7	17.5879	0.00264022	0.00262693	230787	225748	238056	231530	6187.58	17.8208	0.00309805	0.00357034	1.17525	0.232971	1.1734	0.2307	1.35913	0.442681		6	319	276	L A T K A A R Kme2 Sph A P A T	H3 20-32	H3K27me2	H3S28ph
320	277	186557	197371	201078	195002	7544.8	17.5731	0.00258522	0.00257221	218804	230338	235570	228237	8578.13	17.8002	0.00300803	0.00348036	1.17044	0.227046	1.16355	0.218528	1.35306	0.436226		6	320	277	L A T K A A R Kme3 Sph A P A T	H3 20-32	H3K27me3	H3S28ph
321	278	7342972	6481709	6792540	6872407	436151	22.7124	0.185966	0.18503	5881412	6030155	6989028	6.3002e+06	601162	22.587	0.169001	0.169395	0.916738	-0.125418	0.908773	-0.138008	0.915498	-0.127371		6	321	278	L A T K A A R Kac Sph A P A T	H3 20-32	H3K27ac	H3S28ph
322	279	189721	162526	165710	172652	14867.4	17.3975	0.00197144	0.00196151	298494	201927	179798	226740	63118.4	17.7907	0.00296708	0.00343943	1.31327	0.393167	1.50504	0.589799	1.75346	0.810204		6	322	279	P A Tph G G V K K P H R Y R	H3 30-42	H3T32ph
323	280	152816	155204	152793	153604	1385.4	17.2289	0.00144832	0.00144103	302533	202251	181587	228790	64693.4	17.8037	0.00302314	0.00349547	1.48948	0.574807	2.08734	1.06167	2.42567	1.27838		6	323	280	P A T G G V Kme K P H R Y R	H3 30-42	H3K36me1
324	281	174074	142928	148487	155163	16611.6	17.2434	0.00149113	0.00148362	198309	178050	186606	187655	10170.2	17.5177	0.0018986	0.00237146	1.20941	0.274298	1.27326	0.348532	1.59842	0.67665		6	324	281	P A T G G V Kme2 K P H R Y R	H3 30-42	H3K36me2
325	282	166301	168442	168588	167777	1280.34	17.3562	0.00183755	0.0018283	186536	204119	184468	191708	10798.2	17.5485	0.00200939	0.0024822	1.14263	0.192363	1.09352	0.128978	1.35765	0.441116		6	325	282	P A T G G V Kme3 K P H R Y R	H3 30-42	H3K36me3
326	283	166737	166289	161974	165000	2630.15	17.3321	0.00176128	0.00175242	224602	195955	182467	201008	21517.2	17.6169	0.00226364	0.00273632	1.21823	0.284787	1.28522	0.36202	1.56146	0.642894		6	326	283	P A T G G V Kac K P H R Y R	H3 30-42	H3K36ac
327	284	3259663	3189886	2804746	3084765	245000	21.5567	0.0819466	0.0815342	2948844	3375410	3223577	3.18261e+06	216214	21.6018	0.0837737	0.0842078	1.03172	0.0450499	1.0223	0.0318126	1.03279	0.0465485		6	327	284	P A T G G V K Kme P H R Y R	H3 30-42	H3K37me1
328	285	151142	158971	140030	150048	9517.8	17.1951	0.00135065	0.00134385	176592	189848	180685	182375	6787.67	17.4765	0.00175426	0.00222718	1.21545	0.281487	1.29883	0.377211	1.65732	0.72885		6	328	285	P A T G G V K Kme2 P H R Y R	H3 30-42	H3K37me2
329	286	126349	127396	130922	128222	2395.87	16.9683	0.000751258	0.000747477	161840	164018	161857	162572	1252.59	17.3107	0.00121288	0.00168606	1.26789	0.342428	1.61447	0.691058	2.25567	1.17356		6	329	286	P A T G G V K Kme3 P H R Y R	H3 30-42	H3K37me3
330	287	137065	143141	136005	138737	3850.62	17.082	0.00104002	0.00103479	173945	165708	163370	167674	5554.95	17.3553	0.00135238	0.00182549	1.20858	0.273309	1.30033	0.378883	1.76412	0.818951		6	330	287	P A T G G V K Kac P H R Y R	H3 30-42	H3K37ac
331	288	159377	166923	161685	162662	3866.64	17.3115	0.00169706	0.00168852	200353	187690	180604	189549	10004.9	17.5322	0.00195038	0.00242321	1.1653	0.220697	1.14927	0.200713	1.43511	0.521159		6	331	288	P A Tph G G V Kme K P H R Y R	H3 30-42	H3T32ph	H3K36me1
332	289	147373	144373	138815	143520	4342.25	17.1309	0.00117139	0.00116549	163363	165349	184185	170966	11491.3	17.3833	0.00144235	0.00191543	1.19123	0.252451	1.23132	0.300208	1.64345	0.716729		6	332	289	P A Tph G G V Kme2 K P H R Y R	H3 30-42	H3T32ph	H3K36me2
333	290	169646	163130	177247	170008	7065.45	17.3752	0.00189881	0.00188925	197078	200518	211507	203034	7536.44	17.6314	0.00231904	0.00279169	1.19427	0.256124	1.22131	0.288432	1.47767	0.563328		6	333	290	P A Tph G G V Kme3 K P H R Y R	H3 30-42	H3T32ph	H3K36me3
334	291	464001	462594	441263	455953	12741.1	18.7985	0.0097517	0.00970261	459903	462680	469631	464071	5011.02	18.824	0.00945518	0.00992445	1.01781	0.0254625	0.969593	-0.0445489	1.02286	0.0326143		6	334	291	P A Tph G G V Kac K P H R Y R	H3 30-42	H3T32ph	H3K36ac
335	BLANK-6	128873	126603	123331	126269	2786.06	16.9461	0.000697614	0.000694102	151145	158676	132928	147583	13238.4	17.1712	0.000803126	0.0012765	1.1688	0.225026	1.15125	0.203198	1.83907	0.878975		6	335			BLANK-6
336	NEGCTRL-6	215294	186490	184882	195555	17113.1	17.5772	0.00260042	0.00258733	181609	180168	190740	184172	5733.22	17.4907	0.00180339	0.00227629	0.941791	-0.0865205	0.6935	-0.528031	0.879785	-0.184778		6	336	540	10% K R H Rcit Kme V L R D N I Q G	NEGCTRL-6
337	292	419953	492851	520149	477651	51798.5	18.8656	0.0103476	0.0102955	486992	437266	491364	471874	30051	18.848	0.00966848	0.0101377	0.987905	-0.0175552	0.93437	-0.0979343	0.984668	-0.0222913		7	337	292	P A T G G V K K P H R Y R	H3 30-42
338	293	131659	137005	144936	137867	6680.31	17.0729	0.00101612	0.00101101	144018	144822	164811	151217	11779.6	17.2063	0.000902471	0.0013758	1.09684	0.133347	0.888154	-0.171118	1.36082	0.44448		7	338	293	P A T G G V Kme Kme P H R Y R	H3 30-42	H3K36me1	H3K37me1
339	294	137528	142378	139484	139797	2440.07	17.093	0.00106912	0.00106374	184990	185108	184316	184805	427.291	17.4956	0.00182068	0.00229357	1.32195	0.402671	1.70296	0.768049	2.15614	1.10845		7	339	294	P A T G G V Kme Kme2 P H R Y R	H3 30-42	H3K36me1	H3K37me2
340	295	110819	106540	108363	108574	2147.29	16.7283	0.000211657	0.000210592	143983	147854	148479	146772	2435.48	17.1632	0.000780955	0.00125434	1.35182	0.434898	3.68972	1.88351	5.95627	2.57441		7	340	295	P A T G G V Kme Kme3 P H R Y R	H3 30-42	H3K36me1	H3K37me3
341	296	122930	106334	125947	118404	10560.9	16.8534	0.000481609	0.000479184	160707	130078	129523	140103	17846	17.0961	0.000598631	0.0010721	1.18326	0.242771	1.24298	0.313806	2.23735	1.16179		7	341	296	P A T G G V Kme Kac P H R Y R	H3 30-42	H3K36me1	H3K37ac
342	297	198097	188183	180811	189030	8674.1	17.5283	0.00242122	0.00240904	296087	240134	224380	253534	37684.7	17.9518	0.00369957	0.00417157	1.34123	0.42356	1.52797	0.61162	1.73163	0.792134		7	342	297	P A T G G V Kme2 Kme P H R Y R	H3 30-42	H3K36me2	H3K37me1
343	298	240096	225051	221912	229020	9719.94	17.8051	0.00351945	0.00350173	262755	258494	273591	264947	7783.47	18.0153	0.00401157	0.00448343	1.15687	0.21023	1.13983	0.188819	1.28035	0.356533		7	343	298	P A T G G V Kme2 Kme2 P H R Y R	H3 30-42	H3K36me2	H3K37me2
344	299	116466	120610	119200	118759	2106.96	16.8577	0.000491358	0.000488885	161147	163750	156959	160619	3426.19	17.2933	0.00115949	0.0016327	1.35248	0.435607	2.35977	1.23865	3.33964	1.73969		7	344	299	P A T G G V Kme2 Kme3 P H R Y R	H3 30-42	H3K36me2	H3K37me3
345	300	111334	113554	139722	121537	15788	16.891	0.00056765	0.000564793	154988	158321	130515	147941	15183.4	17.1747	0.000812922	0.00128629	1.21726	0.283634	1.43208	0.518115	2.27746	1.18743		7	345	300	P A T G G V Kme2 Kac P H R Y R	H3 30-42	H3K36me2	H3K37ac
346	301	320408	340456	326630	329165	10261.5	18.3284	0.00626973	0.00623817	319644	300911	286186	302247	16769	18.2054	0.00503128	0.00550265	0.918224	-0.123081	0.802472	-0.317477	0.882094	-0.180996		7	346	301	P A T G G V Kme3 Kme P H R Y R	H3 30-42	H3K36me3	H3K37me1
347	302	114756	117290	112623	114890	2336.37	16.8099	0.000385104	0.000383165	135162	139869	148333	141121	6674.21	17.1066	0.000626479	0.00109994	1.22832	0.296687	1.62678	0.702019	2.87066	1.52138		7	347	302	P A T G G V Kme3 Kme2 P H R Y R	H3 30-42	H3K36me3	H3K37me2
348	303	113792	110708	112163	112221	1542.82	16.776	0.000311814	0.000310245	148319	151295	152840	150818	2297.94	17.2024	0.000891563	0.0013649	1.34394	0.426466	2.85928	1.51565	4.39942	2.13731		7	348	303	P A T G G V Kme3 Kme3 P H R Y R	H3 30-42	H3K36me3	H3K37me3
349	304	123500	119624	123597	122240	2266.33	16.8994	0.000586975	0.00058402	163193	169562	173293	168683	5107.1	17.364	0.00137994	0.00185304	1.37993	0.464591	2.35094	1.23324	3.17291	1.66581		7	349	304	P A T G G V Kme3 Kac P H R Y R	H3 30-42	H3K36me3	H3K37ac
350	305	233220	247291	257523	246011	12201.9	17.9084	0.00398609	0.00396603	270626	257326	235738	254563	17607.3	17.9577	0.00372772	0.00419971	1.03476	0.0492999	0.935181	-0.0966817	1.05892	0.0825945		7	350	305	P A T G G V Kac Kme P H R Y R	H3 30-42	H3K36ac	H3K37me1
351	306	624827	665571	661859	650752	22528.6	19.3117	0.0151015	0.0150255	545567	524173	634150	567963	58308.9	19.1154	0.0122953	0.0127633	0.87278	-0.196311	0.814182	-0.296577	0.849443	-0.235411		7	351	306	P A T G G V Kac Kme2 P H R Y R	H3 30-42	H3K36ac	H3K37me2
352	307	197328	206930	194150	199469	6653.65	17.6058	0.00270791	0.00269428	223468	223993	236554	228005	7408.3	17.7987	0.00300168	0.00347401	1.14306	0.192899	1.10848	0.148588	1.2894	0.366702		7	352	307	P A T G G V Kac Kme3 P H R Y R	H3 30-42	H3K36ac	H3K37me3
353	308	241927	253111	223927	239655	14724.1	17.8706	0.00381153	0.00379234	315097	326292	335712	325700	10320.2	18.3132	0.00567244	0.00614351	1.35904	0.442586	1.48823	0.5736	1.61998	0.695973		7	353	308	P A T G G V Kac Kac P H R Y R	H3 30-42	H3K36ac	H3K37ac
354	309	2925336	2495531	3484694	2.96852e+06	495993	21.5013	0.0787542	0.0783578	3588513	2905979	3111117	3.20187e+06	350200	21.6105	0.0843002	0.084734	1.07861	0.109171	1.07042	0.0981789	1.08137	0.112864		7	354	309	K P H R Y R P G T V A L R	H3 37-49
355	310	189222	193356	195058	192545	3001.27	17.5548	0.00251776	0.00250508	192558	197035	187124	192239	4963.19	17.5525	0.00202392	0.00249671	0.998409	-0.00229711	0.803857	-0.314989	0.996659	-0.00482868		7	355	310	K P H Rme Y R P G T V A L R	H3 37-49	H3R40me1
356	311	172309	168083	166451	168948	3023.21	17.3662	0.0018697	0.00186028	188288	196059	203026	195791	7372.65	17.579	0.00212102	0.00259377	1.15889	0.212738	1.13442	0.181955	1.39429	0.479528		7	356	311	K P H Rme2a Y R P G T V A L R	H3 37-49	H3R40me2a
357	312	132970	124450	120872	126097	6214.96	16.9442	0.000692899	0.000689412	164250	166262	171518	167343	3752.72	17.3525	0.00134333	0.00181645	1.3271	0.408273	1.93871	0.955093	2.63478	1.39768		7	357	312	K P H Rme2s Y R P G T V A L R	H3 37-49	H3R40me2s
358	313	113540	119888	106019	113149	6942.76	16.7879	0.0003373	0.000335602	161436	166096	131662	153065	18681.1	17.2238	0.000952982	0.00142629	1.35277	0.435917	2.82533	1.49842	4.24993	2.08744		7	358	313	K P H Rcit Y R P G T V A L R	H3 37-49	H3R40cit
359	314	105464	107844	106350	106553	1202.87	16.7012	0.000156145	0.000155359	127897	127549	128095	127847	276.413	16.9641	0.00026359	0.000737221	1.19985	0.262852	1.68811	0.755407	4.74527	2.24649		7	359	314	K P H R Y Rme P G T V A L R	H3 37-49	H3R42me1
360	315	111595	110866	114039	112167	1661.95	16.7753	0.000310322	0.00030876	134270	134435	143476	137394	5268.1	17.068	0.000524573	0.000998081	1.22491	0.292671	1.69042	0.757378	3.23254	1.69267		7	360	315	K P H R Y R me2a P G T V A L R	H3 37-49	H3R42me2a
361	316	130813	127014	126304	128044	2424.44	16.9663	0.000746351	0.000742595	158917	165384	167543	163948	4488.71	17.3229	0.00125051	0.00172367	1.28041	0.356602	1.67549	0.744586	2.32115	1.21484		7	361	316	K P H R Y Rme2s P G T V A L R	H3 37-49	H3R42me2s
362	317	109787	105215	110020	108341	2709.41	16.7252	0.000205249	0.000204216	148622	171297	156990	158970	11466.4	17.2784	0.00111441	0.00158764	1.46731	0.553177	5.42956	2.44083	7.77432	2.95872		7	362	317	K P H R Y Rcit P G T V A L R	H3 37-49	H3R42cit
363	318	105524	104801	107861	106062	1599.37	16.6945	0.00014267	0.000141952	129754	131526	131067	130782	919.659	16.9968	0.000343835	0.000817428	1.23307	0.30226	2.41	1.26903	5.75849	2.52569		7	363	318	K P H R Y R P G Tph V A L R	H3 37-49	H3T45ph
364	319	103418	105680	109387	106162	3013.51	16.6959	0.000145407	0.000144675	123505	127155	127678	126113	2273.4	16.9444	0.000216177	0.000689831	1.18793	0.24845	1.4867	0.572116	4.76813	2.25342		7	364	319	K P H Rme Y R meP G T V A L R	H3 37-49	H3R40me1	H3R42me1
365	320	105212	111713	108998	108641	3265.17	16.7292	0.000213497	0.000212422	133301	138243	144122	138555	5417.26	17.0801	0.000556331	0.00102982	1.27535	0.350894	2.6058	1.38173	4.848	2.27739		7	365	320	K P H Rme Y Rme2a P G T V A L R	H3 37-49	H3R40me1	H3R42me2a
366	321	137569	119651	115764	124328	11630.6	16.9238	0.000644308	0.000641065	163572	164083	169151	165602	3084.13	17.3374	0.00129572	0.00176887	1.33198	0.413569	2.01103	1.00793	2.75926	1.46428		7	366	321	K P H Rme Y Rme2s P G T V A L R	H3 37-49	H3R40me1	H3R42me2s
367	322	245823	217509	225029	229454	14666.4	17.8078	0.00353137	0.00351359	347023	292024	244042	294363	51530.3	18.1672	0.00481575	0.00528722	1.28289	0.359393	1.36371	0.447533	1.50479	0.589563		7	367	322	K P H Rme Y Rcit P G T V A L R	H3 37-49	H3R40me1	H3R42cit
368	323	120922	129633	124142	124899	4404.56	16.9304	0.00065999	0.000656668	139631	135727	140547	138635	2559.71	17.0809	0.000558508	0.001032	1.10998	0.15053	0.846238	-0.240864	1.57157	0.652208		7	368	323	K P H Rme2a Y Rme P G T V A L R	H3 37-49	H3R40me2a	H3R42me1
369	324	117217	115402	122099	118239	3463.57	16.8514	0.000477095	0.000474694	138501	148854	152933	146763	7439.82	17.1631	0.0007807	0.00125409	1.24123	0.311775	1.63636	0.71049	2.64188	1.40157		7	369	324	K P H Rme2a Y Rme2a P G T V A L R	H3 37-49	H3R40me2a	H3R42me2a
370	325	121257	118510	119605	119791	1382.88	16.8702	0.0005197	0.000517084	164249	170059	170256	168188	3412.7	17.3597	0.00136642	0.00183953	1.40402	0.489559	2.62925	1.39465	3.5575	1.83086		7	370	325	K P H Rme2a Y Rme2s P G T V A L R	H3 37-49	H3R40me2a	H3R42me2s
371	326	110747	108991	101373	107037	4983.13	16.7078	0.000169446	0.000168593	154517	158333	120210	144353	20995.6	17.1392	0.000714834	0.00118825	1.34863	0.431495	4.21865	2.07678	7.04803	2.81722		7	371	326	K P H Rme2a Y Rcit P G T V A L R	H3 37-49	H3R40me2a	H3R42cit
372	327	128385	125900	127714	127333	1285.56	16.9582	0.000726834	0.000723176	140638	136549	131644	136277	4503.17	17.0562	0.000494046	0.000967568	1.07024	0.0979357	0.679723	-0.55698	1.33794	0.420017		7	372	327	K P H Rme2s Y Rme P G T V A L R	H3 37-49	H3R40me2s	H3R42me1
373	328	141354	149362	152445	147720	5724.85	17.1725	0.00128673	0.00128025	157544	163758	170643	163982	6552.36	17.3232	0.00125143	0.00172459	1.11008	0.150666	0.972564	-0.0401356	1.34707	0.429824		7	373	328	K P H Rme2s Y Rme2a P G T V A L R	H3 37-49	H3R40me2s	H3R42me2a
374	329	118825	119725	121692	120081	1466.22	16.8736	0.000527664	0.000525008	149158	162866	163756	158593	8183.35	17.275	0.00110412	0.00157736	1.32072	0.401328	2.09247	1.06521	3.00444	1.5871		7	374	329	K P H Rme2s Y Rme2s P G T V A L R	H3 37-49	H3R40me2s	H3R42me2s
375	330	103546	100426	103346	102439	1746.46	16.6444	4.31809e-05	4.29636e-05	143361	145764	147223	145449	1950.13	17.1502	0.000744796	0.0012182	1.41986	0.505747	17.2483	4.10838	28.3543	4.82549		7	375	330	K P H Rme2s Y Rcit P G T V A L R	H3 37-49	H3R40me2s	H3R42cit
376	331	104235	102864	101865	102988	1189.86	16.6521	5.82489e-05	5.79557e-05	113666	123656	121290	119537	5220.53	16.8671	3.64229e-05	0.000510162	1.16069	0.214985	0.625297	-0.677386	8.80261	3.13793		7	376	331	K P H Rcit Y Rme P G T V A L R	H3 37-49	H3R40cit	H3R42me1
377	332	115642	115219	119945	116935	2615.01	16.8354	0.000441284	0.000439063	131619	134162	142452	136078	5664.87	17.0541	0.000488597	0.000962121	1.1637	0.218719	1.10722	0.146938	2.19131	1.13179		7	377	332	K P H Rcit Y Rme2a P G T V A L R	H3 37-49	H3R40cit	H3R42me2a
378	333	116678	116290	117460	116809	595.954	16.8338	0.000437823	0.00043562	143589	151675	156976	150747	6741.61	17.2018	0.000889613	0.00136295	1.29054	0.367971	2.0319	1.02283	3.12876	1.64559		7	378	333	K P H Rcit Y Rme2s P G T V A L R	H3 37-49	H3R40cit	H3R42me2s
379	334	111064	110944	107484	109831	2033.16	16.7449	0.000246169	0.00024493	145692	152050	146770	148171	3402.56	17.1769	0.000819191	0.00129256	1.34908	0.431979	3.32776	1.73455	5.27727	2.39979		7	379	334	K P H Rcit Y Rcit P G T V A L R	H3 37-49	H3R40cit	H3R42cit
380	335	112560	105563	103946	107356	4578.46	16.712	0.000178216	0.000177319	161542	123908	121841	135764	22348.6	17.0507	0.000480013	0.000953541	1.26461	0.33869	2.69343	1.42944	5.37754	2.42695		7	380	335	K P H R Y Rme P G Tph V A L R	H3 37-49	H3R42me1	H3T45ph
381	336	105500	107967	108280	107249	1522.74	16.7106	0.000175269	0.000174386	130724	131078	127657	129820	1881.27	16.9861	0.000317518	0.000791123	1.21045	0.275545	1.81161	0.857271	4.53661	2.18162		7	381	336	K P H R Y Rme2a P G Tph V A L R	H3 37-49	H3R42me2a	H3T45ph
382	337	116139	116988	117158	116762	545.903	16.8332	0.000436514	0.000434317	132525	140507	152183	141738	9886.68	17.1129	0.000643346	0.0011168	1.21391	0.279663	1.47383	0.559567	2.57139	1.36255		7	382	337	K P H R Y Rme2s P G Tph V A L R	H3 37-49	H3R42me2s	H3T45ph
383	338	108653	109972	106518	108381	1742.99	16.7258	0.000206357	0.000205318	141778	146271	153234	147094	5772.21	17.1664	0.000789767	0.00126315	1.3572	0.44063	3.8272	1.93629	6.15216	2.62109		7	383	338	K P H R Y Rcit P G Tph V A L R	H3 37-49	H3R42cit	H3T45ph
384	339	137245	138574	122125	132648	9137.38	17.0172	0.0008728	0.000868407	184271	189614	148512	174132	22348.1	17.4098	0.00152892	0.00200195	1.31274	0.392581	1.75174	0.808793	2.30532	1.20497		7	384	339	T V A L R E I R R Y Q K S	H3 45-57
385	340	139783	142129	143744	141885	1991.71	17.1144	0.00112648	0.00112081	160248	163925	156772	160315	3576.97	17.2905	0.00115119	0.0016244	1.12989	0.176184	1.02193	0.0312977	1.4493	0.535359		7	385	340	T V A L Rme E I R R Y Q K S	H3 45-57	H3R49me1
386	341	128203	124717	127072	126664	1778.45	16.9506	0.000708462	0.000704896	157126	147363	154412	152967	5039.35	17.2229	0.000950312	0.00142362	1.20766	0.272214	1.34137	0.423711	2.01961	1.01408		7	386	341	T V A L Rme2a E I R R Y Q K S	H3 45-57	H3R49me2a
387	342	132686	135267	145698	137884	6889.36	17.0731	0.00101659	0.00101147	165435	173270	179018	172574	6818.17	17.3969	0.00148633	0.00195938	1.25159	0.323766	1.46208	0.548022	1.93716	0.953946		7	387	342	T V A L Rme2s E I R R Y Q K S	H3 45-57	H3R49me2s
388	343	125406	125698	134697	128600	5281.89	16.9725	0.000761639	0.000757805	173409	175829	171924	173721	1971.07	17.4064	0.00151767	0.00199071	1.35086	0.433875	1.99264	0.994678	2.62694	1.39338		7	388	343	T V A L Rcit E I R R Y Q K S	H3 45-57	H3R49cit
389	344	135415	139435	143161	139337	3873.93	17.0882	0.0010565	0.00105118	159130	163779	158741	160550	2803.15	17.2927	0.00115761	0.00163082	1.15224	0.204444	1.09571	0.131861	1.55142	0.633586		7	389	344	T V A L R E I Rme R Y Q K S	H3 45-57	H3R52me1
390	345	149924	156157	156094	154058	3580.58	17.2331	0.00146079	0.00145344	166680	169949	171559	169396	2486.06	17.37	0.00139944	0.00187254	1.09956	0.136923	0.958003	-0.0618974	1.28835	0.365523		7	390	345	T V A L R E I Rme2a R Y Q K S	H3 45-57	H3R52me2a
391	BLANK-7	132924	120460	118769	124051	7730.62	16.9206	0.000636701	0.000633496	133461	141070	145696	140076	6177.81	17.0958	0.000597893	0.00107137	1.12918	0.175273	0.939048	-0.0907286	1.6912	0.758043		7	391	925	10% K G K G K G K G K G K G K	NEGCTRL-7
392	POSCTRL-7	4140983	3802150	3433047	3792060	354076	21.8546	0.101371	0.100861	4214145	4378916	4267226	4.28676e+06	84104.8	22.0315	0.113959	0.114378	1.13046	0.176907	1.12417	0.168865	1.13402	0.181449		7	392	926	10% Kac G Kac G Kac G Kac G Kac G Kac G Kac	POSCTRL-7
393	346	187135	187446	211127	195236	13762.9	17.5749	0.00259165	0.00257861	207078	214094	211626	210933	3559.02	17.6864	0.00253496	0.00300751	1.0804	0.111563	0.978125	-0.0319095	1.16633	0.22198		8	393	346	T V A L R E I Rme2s R Y Q K S	H3 45-57	H3R52me2s
394	347	143223	150422	146144	146596	3620.75	17.1615	0.00125586	0.00124954	171416	190141	169720	177092	11332.2	17.4341	0.00160984	0.00208284	1.20803	0.272653	1.28186	0.358241	1.66688	0.737151		8	394	347	T V A L R E I Rcit R Y Q K S	H3 45-57	H3R52cit
395	348	146427	147926	143796	146050	2090.7	17.1561	0.00124085	0.0012346	160297	160447	167501	162748	4116.61	17.3123	0.00121771	0.00169089	1.11434	0.156184	0.981353	-0.0271562	1.36958	0.453735		8	395	348	T V A L R E I R Rme Y Q K S	H3 45-57	H3R53me1
396	349	145328	141096	141266	142563	2395.78	17.1212	0.0011451	0.00113934	171840	169298	170326	170488	1278.72	17.3793	0.0014293	0.00190237	1.19588	0.258067	1.24818	0.319825	1.66972	0.739602		8	396	349	T V A L R E I R Rme2a Y Q K S	H3 45-57	H3R53me2a
397	350	136509	129005	132090	132535	3771.71	17.016	0.000869687	0.00086531	160165	166229	159612	162002	3671.12	17.3057	0.00119731	0.0016705	1.22234	0.289642	1.37671	0.461225	1.93052	0.948988		8	397	350	T V A L R E I R Rme2s Y Q K S	H3 45-57	H3R53me2s
398	351	138231	138710	135961	137634	1468.52	17.0705	0.00100973	0.00100465	166544	171611	169697	169284	2558.62	17.3691	0.00139638	0.00186947	1.22996	0.298609	1.38292	0.467722	1.86083	0.895943		8	398	351	T V A L R E I R Rcit Y Q K S	H3 45-57	H3R53cit
399	352	150781	157882	159497	156053	4636.83	17.2517	0.00151558	0.00150795	191080	172662	177639	180460	9527.62	17.4613	0.00170192	0.00217487	1.1564	0.209643	1.12295	0.16729	1.44227	0.528337		8	399	352	T V A L Rme E I Rme R Y Q K S	H3 45-57	H3R49me1	H3R52me1
400	353	199620	159785	163668	174358	21963.8	17.4117	0.00201827	0.00200811	484990	198362	191476	291609	167508	18.1537	0.00474047	0.00521198	1.67248	0.741987	2.34878	1.23191	2.59546	1.37599		8	400	353	T V A L Rme E I Rme2a R Y Q K S	H3 45-57	H3R49me1	H3R52me2a
401	354	204466	185270	166697	185478	18885.4	17.5009	0.00232366	0.00231196	217577	219040	210198	215605	4739.39	17.718	0.00266269	0.00313518	1.16243	0.217145	1.1459	0.196486	1.35607	0.439432		8	401	354	T V A L Rme E I Rme2s R Y Q K S	H3 45-57	H3R49me1	H3R52me2s
402	355	167258	160817	154377	160817	6440.5	17.2951	0.00164641	0.00163813	185810	183694	182286	183930	1773.81	17.4888	0.00179677	0.00226967	1.14372	0.193734	1.09132	0.126078	1.38553	0.470438		8	402	355	T V A L Rme E I Rcit R Y Q K S	H3 45-57	H3R49me1	H3R52cit
403	356	193736	195426	198044	195735	2170.59	17.5785	0.00260536	0.00259225	227606	234941	214991	225846	10090.8	17.785	0.00294265	0.00341502	1.15383	0.206435	1.12946	0.175633	1.31739	0.397687		8	403	356	T V A L Rme2a E I Rme R Y Q K S	H3 45-57	H3R49me2a	H3R52me1
404	357	217161	215787	197247	210065	11122	17.6805	0.0029989	0.0029838	216431	210411	222354	216399	5971.57	17.7233	0.00268439	0.00315687	1.03015	0.0428558	0.895124	-0.159841	1.058	0.0813419		8	404	357	T V A L Rme2a E I Rme2a R Y Q K S	H3 45-57	H3R49me2a	H3R52me2a
405	358	139003	143631	140688	141107	2342.32	17.1064	0.00110512	0.00109956	212863	172410	169079	184784	24374.1	17.4955	0.00182011	0.00229301	1.30953	0.389047	1.64699	0.719829	2.0854	1.06032		8	405	358	T V A L Rme2a E I Rme2s R Y Q K S	H3 45-57	H3R49me2a	H3R52me2s
406	359	129239	139125	136281	134882	5089.39	17.0413	0.000934143	0.000929441	159183	165345	174190	166239	7543.37	17.3429	0.00131315	0.00178628	1.23248	0.301568	1.40572	0.491313	1.92189	0.942523		8	406	359	T V A L Rme2a E I Rcit R Y Q K S	H3 45-57	H3R49me2a	H3R52cit
407	360	156184	150842	149269	152098	3624.65	17.2146	0.00140696	0.00139988	189305	190267	197033	192202	4211.61	17.5523	0.0020229	0.00249569	1.26367	0.337617	1.43777	0.523838	1.78279	0.834136		8	407	360	T V A L Rme2s E I Rme R Y Q K S	H3 45-57	H3R49me2s	H3R52me1
408	361	183313	171620	157270	170734	13044.1	17.3814	0.00191876	0.0019091	199336	196672	188988	194999	5373.11	17.5731	0.00209936	0.00257212	1.14212	0.191711	1.09412	0.129773	1.34729	0.430062		8	408	361	T V A L Rme2s E I Rme2a R Y Q K S	H3 45-57	H3R49me2s	H3R52me2a
409	362	137723	136029	137568	137107	936.499	17.0649	0.000995248	0.000990239	168979	180023	181628	176877	6886.5	17.4324	0.00160395	0.00207694	1.29007	0.367445	1.6116	0.688498	2.09742	1.06861		8	409	362	T V A L Rme2s E I Rme2s R Y Q K S	H3 45-57	H3R49me2s	H3R52me2s
410	363	130922	116241	120971	122711	7493.63	16.9049	0.00059991	0.00059689	164025	164160	160394	162860	2136.4	17.3133	0.00122075	0.00169393	1.32718	0.408361	2.0349	1.02496	2.83793	1.50484		8	410	363	T V A L Rme2s E I Rcit R Y Q K S	H3 45-57	H3R49me2s	H3R52cit
411	364	164321	159595	161544	161820	2375.06	17.304	0.00167395	0.00166552	201342	198684	195408	198478	2972.36	17.5986	0.00219448	0.00266719	1.22654	0.294589	1.31096	0.390621	1.60141	0.679347		8	411	364	T V A L Rcit E I Rme R Y Q K S	H3 45-57	H3R49cit	H3R52me1
412	365	145772	148403	145000	146392	1784.12	17.1595	0.00125024	0.00124395	185402	177459	177580	180147	4551.37	17.4588	0.00169335	0.0021663	1.23058	0.299341	1.35442	0.437673	1.74147	0.800309		8	412	365	T V A L Rcit E I Rme2a R Y Q K S	H3 45-57	H3R49cit	H3R52me2a
413	366	115283	122441	140767	126164	13143.5	16.9449	0.000694721	0.000691224	155219	154352	191271	166947	21069.4	17.349	0.0013325	0.00180563	1.32326	0.404097	1.91804	0.939632	2.61222	1.38527		8	413	366	T V A L Rcit E I Rme2s R Y Q K S	H3 45-57	H3R49cit	H3R52me2s
414	367	151641	154563	133831	146678	11221.6	17.1623	0.00125811	0.00125178	207812	196033	178868	194238	14555.3	17.5675	0.00207856	0.00255133	1.32424	0.405167	1.65212	0.724318	2.03816	1.02726		8	414	367	T V A L Rcit E I Rcit R Y Q K S	H3 45-57	H3R49cit	H3R52cit
415	368	151513	157633	159134	156093	4037.06	17.252	0.00151668	0.00150904	194890	202092	196948	197977	3709.56	17.595	0.00218077	0.00265349	1.26832	0.342921	1.43786	0.523924	1.75839	0.814259		8	415	368	T V A L R E I Rme Rme Y Q K S	H3 45-57	H3R52me1	H3R53me1
416	369	186649	188282	183909	186280	2209.73	17.5071	0.00234569	0.00233389	231642	230105	222550	228099	4866.64	17.7993	0.00300425	0.00347658	1.2245	0.292187	1.28075	0.356989	1.48961	0.574934		8	416	369	T V A L R E I Rme Rme2a Y Q K S	H3 45-57	H3R52me1	H3R53me2a
417	370	183350	184029	187262	184880	2090.34	17.4962	0.00230725	0.00229564	215751	215595	216303	215883	372	17.7199	0.00267029	0.00314278	1.16769	0.223658	1.15735	0.210819	1.36902	0.453144		8	417	370	T V A L R E I Rme Rme2s Y Q K S	H3 45-57	H3R52me1	H3R53me2s
418	371	138113	137607	152548	142756	8483.89	17.1232	0.0011504	0.0011446	175365	176727	171972	174688	2448.72	17.4144	0.00154411	0.00201714	1.22368	0.291229	1.34225	0.424649	1.7623	0.81746		8	418	371	T V A L R E I Rme Rcit Y Q K S	H3 45-57	H3R52me1	H3R53cit
419	372	133707	131735	137137	134193	2733.6	17.0339	0.00091523	0.000910623	166959	179994	172873	173275	6526.81	17.4027	0.00150549	0.00197854	1.29124	0.368757	1.64494	0.718031	2.17273	1.11951		8	419	372	T V A L R E I Rme2a Rme Y Q K S	H3 45-57	H3R52me2a	H3R53me1
420	373	174584	174725	176022	175110	792.668	17.4179	0.00203894	0.00202868	228529	220350	218655	222511	5279.91	17.7635	0.00285149	0.0033239	1.27069	0.345615	1.39852	0.483897	1.63845	0.712336		8	420	373	T V A L R E I Rme2a Rme2a Y Q K S	H3 45-57	H3R52me2a	H3R53me2a
421	374	164380	167414	167828	166541	1882.61	17.3455	0.00180359	0.00179451	198941	210158	209261	206120	6233.35	17.6531	0.00240339	0.00287601	1.23766	0.30761	1.33256	0.414198	1.60267	0.680474		8	421	374	T V A L R E I Rme2a Rme2s Y Q K S	H3 45-57	H3R52me2a	H3R53me2s
422	375	150506	153225	146992	150241	3124.94	17.1969	0.00135596	0.00134913	187538	194605	188294	190146	3880.35	17.5367	0.00196669	0.00243951	1.2656	0.339826	1.45041	0.53646	1.80821	0.854564		8	422	375	T V A L R E I Rme2a Rcit Y Q K S	H3 45-57	H3R52me2a	H3R53cit
423	376	130280	118298	120809	123129	6318.93	16.9098	0.00061138	0.000608303	174849	150311	159048	161403	12437.3	17.3003	0.00118092	0.00165412	1.31084	0.390494	1.93157	0.949774	2.71924	1.4432		8	423	376	T V A L R E I Rme2s Rme Y Q K S	H3 45-57	H3R52me2s	H3R53me1
424	377	139743	142002	146916	142887	3667.48	17.1245	0.00115399	0.00114818	180619	180174	176863	179219	2052.16	17.4514	0.00166797	0.00214094	1.25427	0.326846	1.44539	0.53146	1.86463	0.898888		8	424	377	T V A L R E I Rme2s Rme2a Y Q K S	H3 45-57	H3R52me2s	H3R53me2a
425	378	138834	134207	135767	136269	2354.05	17.0561	0.000972252	0.000967359	206552	174734	168757	183348	20316.5	17.4842	0.00178085	0.00225376	1.34548	0.428121	1.83167	0.873162	2.32981	1.22021		8	425	378	T V A L R E I Rme2s Rme2s Y Q K S	H3 45-57	H3R52me2s	H3R53me2s
426	379	131651	128680	124949	128427	3358.17	16.9706	0.00075687	0.00075306	162919	161830	167662	164137	3100.92	17.3245	0.00125567	0.00172883	1.27806	0.353956	1.65904	0.730345	2.29575	1.19896		8	426	379	T V A L R E I Rme2s Rcit Y Q K S	H3 45-57	H3R52me2s	H3R53cit
427	380	126214	129141	117248	124201	6196.77	16.9223	0.00064082	0.000637595	162943	164605	170586	166045	4019.74	17.3412	0.00130782	0.00178096	1.3369	0.418895	2.04086	1.02918	2.79325	1.48194		8	427	380	T V A L R E I Rcit Rme Y Q K S	H3 45-57	H3R52cit	H3R53me1
428	381	136899	139066	135220	137062	1928.15	17.0645	0.000994012	0.000989009	182219	178793	175703	178905	3259.44	17.4488	0.0016594	0.00213237	1.30529	0.384369	1.66939	0.739323	2.15606	1.1084		8	428	381	T V A L R E I Rcit Rme2a Y Q K S	H3 45-57	H3R52cit	H3R53me2a
429	382	174477	167561	170551	170863	3468.54	17.3825	0.0019223	0.00191262	202948	204165	208001	205038	2637.2	17.6455	0.00237381	0.00284644	1.20001	0.263051	1.23488	0.304375	1.48824	0.573609		8	429	382	T V A L R E I Rcit Rme2s Y Q K S	H3 45-57	H3R52cit	H3R53me2s
430	383	139839	142901	144278	142339	2272.18	17.119	0.00113895	0.00113322	177520	177181	174509	176403	1649.27	17.4285	0.00159101	0.00206401	1.23932	0.309543	1.3969	0.482232	1.82137	0.865022		8	430	383	T V A L R E I Rcit Rcit Y Q K S	H3 45-57	H3R52cit	H3R53cit
431	384	122471	124761	121661	122964	1607.8	16.9079	0.000606858	0.000603803	161189	161992	169822	164334	4769.39	17.3263	0.00126107	0.00173423	1.33644	0.418394	2.07803	1.05522	2.87217	1.52214		8	431	384	E I R R Y Q K S T E L L I	H3 50-62
432	385	131636	135808	133337	133594	2097.81	17.0275	0.000898771	0.000894247	167578	173875	173268	171574	3473.63	17.3885	0.00145897	0.00193204	1.28429	0.360977	1.6233	0.69893	2.16052	1.11138		8	432	385	E I R R Y Q Kme S T E L L I	H3 50-62	H3K56me1
433	386	115250	119273	119175	117899	2294.91	16.8472	0.000467758	0.000465404	150338	153474	164425	156079	7395.97	17.2519	0.00103539	0.00150865	1.32383	0.404721	2.21351	1.14634	3.2416	1.69671		8	433	386	E I R R Y Q Kme2 S T E L L I	H3 50-62	H3K56me2
434	387	156057	151724	151097	152959	2700.91	17.2228	0.00143061	0.00142341	182320	183414	185245	183660	1477.89	17.4867	0.00178938	0.00226229	1.20071	0.263887	1.25078	0.322829	1.58934	0.668432		8	434	387	E I R R Y Q Kme3 S T E L L I	H3 50-62	H3K56me3
435	388	312092	305015	429241	348783	69768.8	18.412	0.00680849	0.00677422	307159	399138	309103	338467	52551.9	18.3687	0.00602144	0.00649234	0.970423	-0.0433146	0.884401	-0.177227	0.958389	-0.0613166		8	435	388	E I R R Y Q Kac S T E L L I	H3 50-62	H3K56ac
436	389	137163	128223	135467	133618	4748.25	17.0278	0.00089943	0.000894903	172135	165371	166907	168138	3545.96	17.3593	0.00136504	0.00183815	1.25835	0.331532	1.51768	0.601863	2.05402	1.03845		8	436	389	E I R R Y Q K Sph T E L L I	H3 50-62	H3S57ph
437	390	135949	140908	144070	140309	4093.5	17.0982	0.00108319	0.00107774	179013	185099	183276	182463	3123.46	17.4772	0.00175665	0.00222958	1.30043	0.378994	1.62174	0.69754	2.06875	1.04876		8	437	390	E I R R Y Q K S Tph E L L I	H3 50-62	H3T58ph	H3S57ph
438	391	134804	136091	132985	134627	1560.58	17.0386	0.00092714	0.000922473	165058	167354	161986	164799	2693.33	17.3304	0.00127378	0.00174693	1.22412	0.291746	1.37388	0.458258	1.89375	0.921245		8	438	391	E I R R Y Q Kme Sph T E L L I	H3 50-62	H3K56me1	H3S57ph
439	392	125654	123696	124009	124453	1051.8	16.9252	0.000647741	0.000644481	153352	157734	163287	158124	4978.99	17.2707	0.0010913	0.00156454	1.27055	0.345458	1.68478	0.752561	2.4276	1.27953		8	439	392	E I R R Y Q Kme2 Sph T E L L I	H3 50-62	H3K56me2	H3S57ph
440	393	117019	124348	116497	119288	4389.85	16.8641	0.000505895	0.000503349	153651	151593	148645	151296	2516.15	17.207	0.00090464	0.00137797	1.26833	0.342928	1.7882	0.838506	2.7376	1.45291		8	440	393	E I R R Y Q Kme3 Sph T E L L I	H3 50-62	H3K56me3	H3S57ph
441	394	380563	387857	395712	388044	7576.23	18.5659	0.00788673	0.00784703	375399	382202	392231	383277	8467.37	18.548	0.00724646	0.00771678	0.987716	-0.0178316	0.918817	-0.12215	0.983402	-0.0241473		8	441	394	E I R R Y Q Kac Sph T E L L I	H3 50-62	H3K56ac	H3T58ph
442	395	151377	153982	147371	150910	3330.15	17.2033	0.00137433	0.00136741	182736	179859	173034	178543	4983.08	17.4459	0.0016495	0.00212247	1.18311	0.242583	1.20022	0.263302	1.55219	0.634301		8	442	395	E I R R Y Q Kme Sph T E L L I	H3 50-62	H3K56me1	H3T58ph
443	396	137158	130121	129404	132228	4284.82	17.0127	0.000861256	0.000856921	160006	161728	157981	159905	1875.54	17.2869	0.00113998	0.0016132	1.20932	0.274191	1.32363	0.404495	1.88255	0.912688		8	443	396	E I R R Y Q Kme2 S Tph E L L I	H3 50-62	H3K56me2	H3T58ph
444	397	131493	129866	127492	129617	2012.09	16.9839	0.00078956	0.000785586	157100	154602	163407	158370	4537.74	17.2729	0.00109801	0.00157124	1.22183	0.289041	1.39066	0.475769	2.00009	1.00007		8	444	397	E I R R Y Q Kme3 S Tph E L L I	H3 50-62	H3K56me3	H3T58ph
445	398	290613	259572	257989	269391	18395.5	18.0393	0.00462817	0.00460488	291553	607644	291025	396741	182648	18.5978	0.00761451	0.00808466	1.47273	0.558493	1.64525	0.718309	1.75567	0.812024		8	445	398	E I R R Y Q Kac S Tph E L L I	H3 50-62	H3K56ac
446	399	314889	303563	306940	308464	5814.77	18.2347	0.00570123	0.00567253	321506	342686	330848	331680	10614.5	18.3394	0.00583591	0.0063069	1.07526	0.10469	1.02362	0.0336852	1.11183	0.152939		8	446	399	S T E L L I R K L P F Q R	H3 57-69
447	BLANK-8	123277	123089	117875	121414	3066.02	16.8896	0.000564272	0.000561432	145638	140448	145853	143980	3060.4	17.1355	0.000704619	0.00117804	1.18586	0.245934	1.24872	0.320453	2.09828	1.06921		8	447			BLANK-8
448	481	299634	270633	266436	278901	18077.5	18.0894	0.00488934	0.00486473	289962	276726	276765	281151	7630.57	18.101	0.00445456	0.00492621	1.00807	0.0115921	0.911077	-0.134355	1.01264	0.0181186		8	448	481	5% S G Rme G K G G K G L G K G	NEGCTRL-8
449	400	294282	297749	311261	301097	8971.07	18.1999	0.00549891	0.00547124	325821	340519	339941	335427	8324.06	18.3556	0.00593834	0.00640928	1.11402	0.155769	1.07991	0.110913	1.17145	0.228296		9	449	400	S T E L L I Rme K L P F Q R	H3 57-69	H3R63me1
450	401	143043	142761	143756	143187	512.822	17.1275	0.00116222	0.00115637	179489	179734	184095	181106	2591.45	17.4665	0.00171957	0.00219251	1.26482	0.338937	1.47955	0.565158	1.89602	0.922975		9	450	401	S T E L L I Rme2a K L P F Q R	H3 57-69	H3R63me2a
451	402	133709	135686	131138	133511	2280.46	17.0266	0.0008965	0.000891988	157560	162550	147396	155835	7722.81	17.2497	0.00102873	0.00150199	1.16721	0.223064	1.14749	0.198482	1.68387	0.751783		9	451	402	S T E L L I Rme2s K L P F Q R	H3 57-69	H3R63me2s
452	403	128635	126943	125551	127043	1544.43	16.955	0.00071887	0.000715252	142173	148180	149568	146640	3930.58	17.1619	0.000777356	0.00125074	1.15426	0.206965	1.08136	0.112844	1.74868	0.806263		9	452	403	S T E L L I Rcit K L P F Q R	H3 57-69	H3R63cit
453	404	201909	211651	210857	208139	5409.92	17.6672	0.00294601	0.00293118	232517	246316	244220	241018	7436.01	17.8788	0.00335741	0.00382958	1.15796	0.211592	1.13965	0.188589	1.3065	0.385705		9	453	404	S T E L L I R Kme L P F Q R	H3 57-69	H3K64me1
454	405	129251	125518	123635	126135	2858.33	16.9446	0.000693925	0.000690432	164820	166585	162591	164665	2001.49	17.3292	0.00127012	0.00174327	1.30547	0.384572	1.83034	0.872111	2.5249	1.33623		9	454	405	S T E L L I R Kme2 L P F Q R	H3 57-69	H3K64me2
455	406	166026	163984	162697	164236	1678.71	17.3254	0.00174029	0.00173153	252068	413778	186344	284063	117044	18.1159	0.00453418	0.00500579	1.72961	0.790445	2.60542	1.38151	2.89096	1.53155		9	455	406	S T E L L I R Kme3 L P F Q R	H3 57-69	H3K64me3
456	407	886827	864362	885720	878970	12662.7	19.7455	0.021369	0.0212614	865394	884550	860025	869990	12892.2	19.7306	0.020552	0.0210161	0.989783	-0.0148151	0.961769	-0.0562374	0.988459	-0.0167468		9	456	407	S T E L L I R Kac L P F Q R	H3 57-69	H3K64ac
457	408	217169	211840	212210	213740	2975.65	17.7055	0.00309982	0.00308421	239284	250223	256940	248816	8911.74	17.9247	0.00357059	0.00404265	1.16411	0.219223	1.15187	0.20398	1.31076	0.390401		9	457	408	S T E L L I Rme Kme L P F Q R	H3 57-69	H3R63me1	H3K64me1
458	409	142762	141854	136407	140341	3437.06	17.0986	0.00108407	0.00107862	176662	176721	178624	177336	1116.12	17.4361	0.00161649	0.00208948	1.26361	0.337546	1.49113	0.576407	1.93719	0.953966		9	458	409	S T E L L I Rme Kme2 L P F Q R	H3 57-69	H3R63me1	H3K64me2
459	410	137830	141326	137423	138860	2145.58	17.0833	0.00104339	0.00103814	184702	175916	171959	177526	6522.21	17.4377	0.00162169	0.00209468	1.27845	0.3544	1.55425	0.636217	2.01772	1.01273		9	459	410	S T E L L I Rme Kme3 L P F Q R	H3 57-69	H3R63me1	H3K64me3
460	411	870276	675998	766993	771089	97203.7	19.5565	0.0184063	0.0183136	705249	648365	1888922	1.08085e+06	700393	20.0437	0.0263163	0.0267776	1.40171	0.487191	1.42975	0.515761	1.46217	0.548111		9	460	411	S T E L L I Rme Kac L P F Q R	H3 57-69	H3R63me1	H3K64ac
461	412	298346	277999	273161	283169	13364.7	18.1113	0.00500654	0.00498134	297569	296780	324369	306239	15705.7	18.2243	0.00514042	0.00561174	1.08147	0.112998	1.02674	0.038072	1.12655	0.171914		9	461	412	S T E L L I Rme2a Kme L P F Q R	H3 57-69	H3R63me2a	H3K64me1
462	413	177384	182261	177752	179132	2715.75	17.4507	0.0021494	0.00213858	221000	222981	222002	221994	990.522	17.7602	0.00283736	0.00330977	1.23928	0.309497	1.32007	0.400617	1.54765	0.630079		9	462	413	S T E L L I Rme2a Kme2 L P F Q R	H3 57-69	H3R63me2a	H3K64me2
463	414	161992	155877	152497	156789	4812.7	17.2585	0.00153577	0.00152804	193644	194483	198292	195473	2477.11	17.5766	0.00211233	0.00258508	1.24673	0.318148	1.37542	0.459867	1.69176	0.758524		9	463	414	S T E L L I Rme2a Kme3 L P F Q R	H3 57-69	H3R63me2a	H3K64me3
464	415	718010	762322	664361	714898	49054.6	19.4474	0.0168631	0.0167782	725596	719584	733921	726367	7199.53	19.4703	0.0166257	0.0170916	1.01604	0.0229619	0.985924	-0.0204514	1.01868	0.0266992		9	464	415	S T E L L I Rme2a Kac L P F Q R	H3 57-69	H3R63me2a	H3K64ac
465	416	156147	155725	151373	154415	2642.89	17.2365	0.00147059	0.00146318	172425	170902	182334	175220	6207.5	17.4188	0.00155867	0.00203168	1.13474	0.182357	1.05989	0.0839209	1.38854	0.473565		9	465	416	S T E L L I Rme2s Kme L P F Q R	H3 57-69	H3R63me2s	H3K64me1
466	417	143197	138273	143569	141680	2956.12	17.1123	0.00112084	0.00111519	191573	181131	193496	188733	6653.65	17.526	0.00192808	0.00240092	1.33211	0.413717	1.72022	0.78259	2.15292	1.10629		9	466	417	S T E L L I Rme2s Kme2 L P F Q R	H3 57-69	H3R63me2s	H3K64me2
467	418	131532	136227	161107	142955	15894.1	17.1252	0.00115587	0.00115005	184376	178400	187833	183536	4772.23	17.4857	0.00178601	0.00225892	1.28387	0.360501	1.54516	0.627758	1.96419	0.973932		9	467	418	S T E L L I Rme2s Kme3 L P F Q R	H3 57-69	H3R63me2s	H3K64me3
468	419	591851	624234	716323	644136	64578.5	19.297	0.0149198	0.0148447	660062	669717	662690	664156	4991.73	19.3412	0.014925	0.0153917	1.03108	0.0441575	1.00035	0.000509284	1.03685	0.0522094		9	468	419	S T E L L I Rme2s Kac L P F Q R	H3 57-69	H3R63me2s	H3K64ac
469	420	151095	144296	142343	145911	4594.17	17.1547	0.00123705	0.00123082	164246	259342	159510	194366	56320.7	17.5684	0.00208206	0.00255483	1.33208	0.413684	1.68309	0.75111	2.07571	1.05361		9	469	420	S T E L L I Rcit Kme L P F Q R	H3 57-69	H3R63cit	H3K64me1
470	421	131885	132311	132969	132388	546.122	17.0144	0.000865669	0.000861311	151392	168928	172406	164242	11263.5	17.3255	0.00125854	0.0017317	1.24061	0.311047	1.45384	0.539869	2.01054	1.00759		9	470	421	S T E L L I Rcit Kme2 L P F Q R	H3 57-69	H3R63cit	H3K64me2
471	422	144997	147984	148843	147275	2018.74	17.1681	0.00127449	0.00126808	185086	190186	188280	187851	2576.96	17.5192	0.00190395	0.0023768	1.27551	0.351077	1.49389	0.579074	1.87434	0.906381		9	471	422	S T E L L I Rcit Kme3 L P F Q R	H3 57-69	H3R63cit	H3K64me3
472	423	13704878	12940075	13358404	1.33345e+07	382964	23.6687	0.363433	0.361604	11621087	11047436	10440989	11036504	590125	23.3958	0.298481	0.298813	0.827668	-0.272875	0.821281	-0.284052	0.826355	-0.275167		9	472	423	S T E L L I Rcit Kac L P F Q R	H3 57-69	H3R63cit	H3K64ac
473	424	180317	176174	168084	174858	6221.72	17.4158	0.00203202	0.00202179	181099	181848	184676	182541	1886.51	17.4779	0.0017588	0.00223172	1.04394	0.062034	0.865541	-0.208326	1.10383	0.142521		9	473	424	E I A Q D F K T D L R F Q	H3 73-85
474	425	137593	135207	134365	135722	1674.41	17.0503	0.000957212	0.000952394	159148	163382	175634	166055	8561.8	17.3413	0.0013081	0.00178123	1.22349	0.291007	1.36657	0.450561	1.87027	0.903247		9	474	425	E I A Q D F K T D L R F Q	H3 73-85	H3K79me1
475	426	204020	224488	212046	213518	10313.1	17.704	0.00309373	0.00307816	251570	243253	251954	248926	4916.42	17.9254	0.0035736	0.00404566	1.16583	0.221357	1.15511	0.208031	1.31431	0.394309		9	475	426	E I A Q D F Kme T D L R F Q	H3 73-85	H3K79me2
476	427	156727	157141	180189	164686	13427.9	17.3294	0.00175265	0.00174383	188311	192070	207046	195809	9911.36	17.5791	0.00212151	0.00259426	1.18899	0.249732	1.21046	0.275556	1.48768	0.573068		9	476	427	E I A Q D F Kme2 T D L R F Q	H3 73-85	H3K79me3
477	428	25481956	24989278	22154508	2.42086e+07	1.79585e+06	24.529	0.662069	0.658736	24257935	22786329	23289738	2.34447e+07	747936	24.4828	0.637691	0.637863	0.968445	-0.0462587	0.963179	-0.0541237	0.968312	-0.0464554		9	477	428	E I A Q D F Kme3 T D L R F Q	H3 73-85	H3K79ac
478	429	458098	528070	449845	478671	42979.3	18.8687	0.0103756	0.0103234	479550	431540	455346	455479	24005.3	18.797	0.00922027	0.00968966	0.951548	-0.0716509	0.888649	-0.170315	0.938613	-0.091398		9	478	429	E I A Q D F Kac T D L R F Q	H3 73-85	H3T80ph	H3T80ph
479	430	290027	273516	256867	273470	16580	18.061	0.00474019	0.00471633	323412	317444	296037	312298	14394.8	18.2526	0.00530604	0.00577728	1.14198	0.191539	1.11937	0.162692	1.22495	0.292727		9	479	430	E I A Q D F K Tph D L R F Q	H3 73-85	H3K79me1	H3T80ph
480	431	198999	205750	209852	204867	5480.12	17.6443	0.00285615	0.00284177	238670	237568	238384	238207	571.847	17.8619	0.00328058	0.00375279	1.16274	0.21753	1.1486	0.199883	1.32058	0.401172		9	480	431	E I A Q D F Kme Tph D L R F Q	H3 73-85	H3K79me2	H3T80ph
481	432	246268	253585	246459	248771	4170.43	17.9245	0.00406187	0.00404143	233853	236638	219022	229838	9469.59	17.8103	0.00305178	0.00352409	0.923894	-0.114201	0.751323	-0.412495	0.871991	-0.197615		9	481	432	E I A Q D F Kme2 Tph D L R F Q	H3 73-85	H3K79me3	H3T80ph
482	433	6693074	7093733	6840206	6875671	202670	22.7131	0.186056	0.18512	6638193	6581061	6310538	6.50993e+06	175026	22.6342	0.174735	0.175126	0.946807	-0.0788583	0.939152	-0.0905701	0.946015	-0.0800656		9	482	433	E I A Q D F Kme3 Tph D L R F Q	H3 73-85	H3K79ac
483	434	238550	238259	214346	230385	13890.9	17.8137	0.00355695	0.00353904	258847	265685	254314	259615	5724.3	17.986	0.00386583	0.00433775	1.12688	0.172329	1.08684	0.120139	1.22569	0.293589		9	483	434	I H A K R V T I M P K D I Q	H3 112-124
484	435	152754	149750	151677	151394	1521.91	17.2079	0.00138761	0.00138063	194969	190676	195772	193806	2739.95	17.5643	0.00206675	0.00253952	1.28014	0.356306	1.48943	0.574758	1.8394	0.879234		9	484	435	I H A Kme R V T I M P K D I Q	H3 112-124	H3K115me1
485	436	154215	159231	159147	157531	2872.05	17.2653	0.00155616	0.00154833	201286	199802	199418	200169	986.504	17.6109	0.0022407	0.00271339	1.27066	0.34558	1.43989	0.525956	1.75246	0.809385		9	485	436	I H A Kme2 R V T I M P K D I Q	H3 112-124	H3K115me2
486	437	140211	142316	145374	142634	2596.12	17.122	0.00114704	0.00114126	171899	168192	174993	171695	3405.1	17.3895	0.00146228	0.00193535	1.20375	0.267531	1.27484	0.350312	1.69579	0.761961		9	486	437	I H A Kme3 R V T I M P K D I Q	H3 112-124	H3K115me3
487	438	407453	403470	391735	400886	8171.39	18.6128	0.00823941	0.00819793	378620	382633	436371	399208	32246.6	18.6068	0.00768197	0.00815208	0.995814	-0.0060514	0.932345	-0.101065	0.994407	-0.00809161		9	487	438	I H A Kac R V T I M P K D I Q	H3 112-124	H3K115ac
488	439	141811	139215	143050	141359	1957.11	17.109	0.00111202	0.00110642	189970	188369	182866	187068	3726.33	17.5132	0.00188256	0.00235543	1.32336	0.404205	1.69292	0.759515	2.12887	1.09009		9	488	439	I H A K Rme V T I M P K D I Q	H3 112-124	H3R116me1
489	440	142632	138465	140407	140501	2085.1	17.1002	0.00108848	0.001083	175910	178148	171718	175259	3264.11	17.4191	0.00155971	0.00203273	1.24738	0.318902	1.43293	0.518973	1.87695	0.90839		9	489	440	I H A K Rme2a V T I M P K D I Q	H3 112-124	H3R116me2a
490	441	117888	116792	117904	117528	637.445	16.8426	0.00045756	0.000455257	148296	142720	128495	139837	10210.5	17.0934	0.000591368	0.00106484	1.18982	0.250742	1.29244	0.370096	2.339	1.22589		9	490	441	I H A K Rme2s V T I M P K D I Q	H3 112-124	H3R116me2s
491	442	125093	127446	127973	126837	1533.45	16.9526	0.000713222	0.000709632	134126	137733	145199	139019	5647.46	17.0849	0.000569015	0.0010425	1.09604	0.132306	0.79781	-0.325884	1.46907	0.554907		9	491	442	I H A K Rcit V T I M P K D I Q	H3 112-124	H3R116cit
492	443	128550	127380	134329	130086	3720.54	16.9891	0.000802449	0.00079841	170342	176075	175349	173922	3121.55	17.4081	0.00152317	0.00199621	1.33697	0.418971	1.89816	0.924598	2.50023	1.32206		9	492	443	I H A K R V T I M P Kme D I Q	H3 112-124	H3K122me1
493	444	140632	136818	132547	136666	4044.65	17.0603	0.000983137	0.000978188	169647	166487	165662	167265	2103.43	17.3518	0.00134119	0.00181432	1.2239	0.291488	1.3642	0.448055	1.85477	0.891241		9	493	444	I H A K R V T I M P Kme2 D I Q	H3 112-124	H3K122me2
494	445	150039	153321	151132	151497	1671.22	17.2089	0.00139046	0.00138346	184751	180525	179977	181751	2612.48	17.4716	0.0017372	0.00221013	1.1997	0.262671	1.24937	0.321203	1.59754	0.675852		9	494	445	I H A K R V T I M P Kme3 D I Q	H3 112-124	H3K122me3
495	446	254434	258974	253329	255579	2991.62	17.9634	0.00424885	0.00422746	270567	272426	271388	271460	931.608	18.0504	0.00418964	0.00466141	1.06214	0.0869721	0.986066	-0.0202442	1.10265	0.140976		9	495	446	I H A K R V T I M P Kac D I Q	H3 112-124	H3K122ac
496	447	180816	135337	127189	147781	28898.1	17.1731	0.00128839	0.0012819	157600	183074	186290	175655	15718.3	17.4224	0.00157054	0.00204355	1.18862	0.249284	1.219	0.285694	1.59416	0.672792		9	496	447	I H A Kme Rme V T I M P K D I Q	H3 112-124	H3K115me1	H3R116me1
497	448	191927	184713	189770	188803	3702.87	17.5265	0.00241499	0.00240284	232447	229697	220785	227643	6096.29	17.7964	0.00299178	0.00346412	1.20571	0.269889	1.23884	0.308986	1.44168	0.52775		9	497	448	I H A Kme Rme2a V T I M P K D I Q	H3 112-124	H3K115me1	H3R116me2a
498	449	130903	127177	129078	129053	1863.13	16.9776	0.000774061	0.000770165	160193	158545	155639	158126	2305.78	17.2707	0.00109134	0.00156458	1.22528	0.293112	1.40989	0.495578	2.03148	1.02253		9	498	449	I H A Kme Rme2s V T I M P K D I Q	H3 112-124	H3K115me1	H3R116me2s
499	450	136770	138928	142684	139461	2992.77	17.0895	0.0010599	0.00105456	167399	155902	150856	158052	8478.54	17.27	0.00108933	0.00156257	1.13331	0.180544	1.02777	0.0395227	1.48173	0.567281		9	499	450	I H A Kme Rcit V T I M P K D I Q	H3 112-124	H3K115me1	H3R116cit
500	451	126480	126738	125656	126291	565.135	16.9464	0.000698227	0.000694713	144337	151273	171469	155693	14095.7	17.2483	0.00102483	0.0014981	1.23281	0.301948	1.46777	0.553623	2.15644	1.10865		9	500	451	I H A Kme2 Rme V T I M P K D I Q	H3 112-124	H3K115me2	H3R116me1
501	452	136652	128249	128619	131173	4748.27	17.0011	0.000832301	0.000828112	164015	162044	163723	163261	1063.73	17.3168	0.00123172	0.00170489	1.24462	0.315703	1.47989	0.565493	2.05877	1.04178		9	501	452	I H A Kme2 Rme2a V T I M P K D I Q	H3 112-124	H3K115me2	H3R116me2a
502	453	121475	118950	118302	119576	1676.48	16.8676	0.000513795	0.000511209	148509	149557	144358	147475	2749.51	17.1701	0.000800164	0.00127354	1.23332	0.302543	1.55736	0.639103	2.49123	1.31686		9	502	453	I H A Kme2 Rme2s V T I M P K D I Q	H3 112-124	H3K115me2	H3R116me2s
503	BLANK	144539	116111	116738	125796	16234.9	16.9407	0.000684624	0.000681178	140182	134687	123506	132792	8498.03	17.0188	0.000398765	0.000872332	1.05561	0.0780786	0.582459	-0.779771	1.28062	0.356847		9	503			BLANK-9
504	540	309326	303367	293382	302025	8056.27	18.2043	0.00552439	0.00549658	286727	362708	286979	312138	43795.1	18.2518	0.00530168	0.00577292	1.03348	0.047516	0.959685	-0.0593671	1.05027	0.0707656		9	504	540	10% K R H Rcit Kme V L R D N I Q G	POSCTRL-9
505	454	152612	156793	156087	155164	2238.11	17.2434	0.00149116	0.00148365	170669	182460	184732	179287	7549.37	17.4519	0.00166984	0.0021428	1.15547	0.208477	1.11983	0.163278	1.44428	0.530349		10	505	454	I H A Kme2 Rcit V T I M P K D I Q	H3 112-124	H3K115me2	H3R116cit
506	455	116043	113357	117217	115539	1978.74	16.818	0.000402936	0.000400908	130245	132196	133024	131822	1426.82	17.0082	0.000372248	0.000845827	1.14093	0.190208	0.923838	-0.114288	2.10978	1.07709		10	506	455	I H A Kme3 Rme V T I M P K D I Q	H3 112-124	H3K115me3	H3R116me1
507	456	116743	122335	119639	119572	2796.6	16.8675	0.000513704	0.000511118	138562	149038	156388	147996	8958.57	17.1752	0.000814416	0.00128779	1.23771	0.307675	1.58538	0.664831	2.51955	1.33317		10	507	456	I H A Kme3 Rme2a V T I M P K D I Q	H3 112-124	H3K115me3	H3R116me2a
508	457	115743	115130	113940	114938	916.759	16.8105	0.000386422	0.000384477	151459	159769	157316	156181	4269.62	17.2529	0.00103818	0.00151145	1.35884	0.44237	2.68666	1.42581	3.93118	1.97496		10	508	457	I H A Kme3 Rme2s V T I M P K D I Q	H3 112-124	H3K115me3	H3R116me2s
509	458	119395	107670	102830	109965	8517.63	16.7467	0.000249858	0.0002486	153708	124274	126947	134976	16277.1	17.0423	0.000458489	0.000932028	1.22745	0.295662	1.835	0.87578	3.7491	1.90655		10	509	458	I H A Kme3 Rcit V T I M P K D I Q	H3 112-124	H3K115me3	H3R116cit
510	459	240865	243254	263868	249329	12647.7	17.9277	0.0040772	0.00405668	243749	230189	238888	237609	6869.93	17.8582	0.00326422	0.00373643	0.952992	-0.0694632	0.800602	-0.320843	0.921055	-0.118641		10	510	459	I H A Kac Rme V T I M P K D I Q	H3 112-124	H3K115ac	H3R116me1
511	460	398697	392226	352866	381263	24804.4	18.5404	0.0077005	0.00766174	325674	417027	401515	381405	48884	18.541	0.00719528	0.00766563	1.00037	0.000538487	0.934392	-0.0979008	1.00051	0.000732148		10	511	460	I H A Kac Rme2a V T I M P K D I Q	H3 112-124	H3K115ac	H3R116me2a
512	461	138489	135454	128758	134234	4978.96	17.0344	0.000916347	0.000911735	170760	177219	179453	175811	4514.38	17.4237	0.0015748	0.00204781	1.30974	0.389276	1.71857	0.781207	2.24606	1.1674		10	512	461	I H A Kac Rme2s V T I M P K D I Q	H3 112-124	H3K115ac	H3R116me2s
513	462	596355	686931	701804	661697	57074.1	19.3358	0.015402	0.0153245	808130	798204	535563	713966	154581	19.4455	0.0162867	0.0167527	1.07899	0.109685	1.05744	0.0805739	1.0932	0.128557		10	513	462	I H A Kac Rcit V T I M P K D I Q	H3 112-124	H3K115ac	H3R116cit
514	463	114322	114844	116748	115305	1276.92	16.8151	0.000396501	0.000394505	136047	136158	139332	137179	1865.38	17.0657	0.000518705	0.000992215	1.18971	0.250609	1.30821	0.38759	2.51509	1.33061		10	514	463	I H A Kme R V T I M P Kme D I Q	H3 112-124	H3K115me1	H3K122me3
515	464	103080	107022	108943	106348	2988.99	16.6984	0.000150534	0.000149776	125102	125978	130216	127099	2734.99	16.9556	0.000243132	0.000716773	1.19512	0.257151	1.61514	0.691655	4.78564	2.25871		10	515	464	I H A Kme R V T I M P Kme2 D I Q	H3 112-124	H3K115me1	H3K122me1
516	465	114827	112786	113636	113750	1025.24	16.7955	0.000353796	0.000352015	266869	151474	158768	192370	64620.7	17.5535	0.00202751	0.0025003	1.69117	0.758024	5.73072	2.51872	7.10283	2.82839		10	516	465	I H A Kme R V T I M P Kme3 D I Q	H3 112-124	H3K115me1	H3K122me2
517	466	10603175	9982298	11514451	1.07e+07	770650	23.3511	0.291083	0.289618	12961757	12023649	13595373	1.28603e+07	790763	23.6164	0.348338	0.348647	1.2019	0.265312	1.1967	0.259059	1.20382	0.267617		10	517	466	I H A Kme R V T I M P Kac D I Q	H3 112-124	H3K115me1	H3K122me3
518	467	111048	114423	111119	112197	1928.39	16.7757	0.000311146	0.00030958	135263	134045	134506	134605	614.965	17.0384	0.000448329	0.000921872	1.19972	0.262699	1.44089	0.526965	2.97782	1.57425		10	518	467	I H A Kme2 R V T I M P Kme D I Q	H3 112-124	H3K115me2	H3K122ac
519	468	119412	119476	121759	120216	1336.95	16.8753	0.000531371	0.000528697	135862	136799	138667	137109	1428.02	17.065	0.0005168	0.000990311	1.14053	0.189702	0.972578	-0.0401135	1.87312	0.905442		10	519	468	I H A Kme2 R V T I M P Kme2 D I Q	H3 112-124	H3K115me2	H3K122me2
520	469	112873	111039	113041	112318	1110.54	16.7772	0.000314469	0.000312886	144112	10548107	160760	3.61766e+06	6.00195e+06	21.7866	0.0956669	0.0960954	32.2092	5.0094	304.217	8.24896	307.126	8.26268		10	520	469	I H A Kme2 R V T I M P Kme3 D I Q	H3 112-124	H3K115me2	H3K122me3
521	470	244874	227452	247291	239872	10824	17.8719	0.0038175	0.00379828	316907	361104	354469	344160	23833.8	18.3927	0.00617708	0.00664791	1.43476	0.520813	1.6181	0.694299	1.75024	0.807555		10	521	470	I H A Kme2 R V T I M P Kac D I Q	H3 112-124	H3K115me2	H3K122ac
522	471	129425	114418	132123	125322	9539.01	16.9353	0.000671606	0.000668226	183370	126772	134831	148324	30616.8	17.1784	0.000823392	0.00129676	1.18355	0.243116	1.226	0.293964	1.9406	0.956502		10	522	471	I H A Kme3 R V T I M P Kme D I Q	H3 112-124	H3K115me3	H3K122ac
523	472	107905	107321	110620	108615	1760.48	16.7289	0.000212792	0.000211721	128133	125845	130346	128108	2250.6	16.967	0.000270725	0.000744353	1.17947	0.238133	1.27225	0.347383	3.51572	1.81382		10	523	472	I H A Kme3 R V T I M P Kme2 D I Q	H3 112-124	H3K115me3	H3K122me2
524	473	125436	120698	123152	123095	2369.51	16.9094	0.000610456	0.000607383	133374	142527	154595	143499	10643.8	17.1307	0.00069147	0.0011649	1.16575	0.221261	1.13271	0.17978	1.9179	0.939526		10	524	473	I H A Kme3 R V T I M P Kme3 D I Q	H3 112-124	H3K115me3	H3K122me3
525	474	486513	490723	446203	474480	24578.6	18.856	0.0102605	0.0102089	640761	681530	696022	672771	28652.8	19.3598	0.0151605	0.0156271	1.41791	0.503769	1.47756	0.563219	1.53074	0.61423		10	525	474	I H A Kme3 R V T I M P Kac D I Q	H3 112-124	H3K115me3	H3K122ac
526	475	459372	461016	410058	443482	28957.7	18.7585	0.00940922	0.00936186	544137	564090	394934	501054	92442.2	18.9346	0.0104662	0.010935	1.12982	0.17609	1.11233	0.15359	1.16804	0.224085		10	526	475	I H A Kac R V T I M P Kme D I Q	H3 112-124	H3K115ac	H3K122me2
527	476	532330	546554	554806	544563	11369.5	19.0547	0.0121852	0.0121239	545388	529948	524429	533255	10863.8	19.0245	0.0113465	0.0118149	0.979234	-0.0302743	0.93117	-0.102884	0.974513	-0.0372461		10	527	476	I H A Kac R V T I M P Kme2 D I Q	H3 112-124	H3K115ac	H3K122me3
528	477	335376	319334	315417	323376	10575.5	18.3029	0.00611074	0.00607999	274525	274991	291511	280342	9675.16	18.0968	0.00443246	0.00490411	0.866925	-0.206022	0.725355	-0.463242	0.806599	-0.310076		10	528	477	I H A Kac R V T I M P Kme3 D I Q	H3 112-124	H3K115ac	H3K122ac
529	478	1175254	1094525	1100050	1.12328e+06	45098.7	20.0993	0.0280784	0.027937	1290481	1363105	1390509	1.34803e+06	51689.5	20.3624	0.0336206	0.0340784	1.20009	0.263142	1.19738	0.259886	1.21983	0.286679		10	529	478	I H A Kac R V T I M P Kac D I Q	H3 112-124	H3K115ac	H3K122ac
530	H1	126743	129535	139754	132011	6849.69	17.0103	0.000855297	0.000850992	178368	178128	176428	177641	1057.61	17.4386	0.00162485	0.00209784	1.34566	0.428313	1.89975	0.92581	2.46517	1.30169		10	530	H1	A R T K Q T A R K S T G G	Unmod H3 variant
531	H2	116207	113486	111659	113784	2288.6	16.7959	0.000354739	0.000352953	131215	130463	132628	131435	1099.19	17.004	0.000361686	0.000835271	1.15513	0.208055	1.01958	0.027982	2.36652	1.24277		10	531	H2	T A R K S T G G K A P R K	Unmod H3 variant
532	H3	101140	104613	102537	102763	1747.53	16.649	5.20789e-05	5.18168e-05	121866	121880	126178	123308	2485.5	16.9119	0.000139504	0.000613194	1.19992	0.262941	2.67871	1.42154	11.8339	3.56485		10	532	H3	T G G K A P R K Q L A T K	Unmod H3 variant
533	H4	142808	140257	141732	141599	1280.69	17.1115	0.00111862	0.00111299	167071	184000	177732	176268	8558.97	17.4274	0.0015873	0.0020603	1.24484	0.315957	1.41898	0.504852	1.85114	0.888415		10	533	H4	P R K Q L A T K A A R K S	Unmod H3 variant
534	H5	119918	119591	126839	122116	4093.5	16.8979	0.00058356	0.000580623	170597	176195	183959	176917	6710.2	17.4327	0.00160505	0.00207804	1.44876	0.53482	2.75044	1.45966	3.57899	1.83955		10	534	H5	A T K A A R K S A P A T G	Unmod H3 variant
535	H6	198202	143153	148027	163127	30473.2	17.3156	0.00170985	0.00170125	220665	165630	158923	181739	33877	17.4715	0.00173688	0.00220981	1.11409	0.155872	1.01581	0.0226268	1.29894	0.377333		10	535	H6	A T K A A R K S A P S T G	Unmod H3 variant
536	H7	110716	105274	111291	109094	3320.4	16.7352	0.000225928	0.000224791	128209	128613	125958	127593	1430.57	16.9612	0.000256655	0.000730289	1.16958	0.225986	1.136	0.183965	3.24874	1.69988		10	536	H7	R K S A P A T G G V K K P	Unmod H3 variant
537	H8	113023	116711	115721	115152	1908.78	16.8132	0.000392299	0.000390324	136985	147515	154848	146449	8979.05	17.16	0.000772134	0.00124552	1.2718	0.346866	1.96823	0.976898	3.191	1.67401		10	537	H8	R K S A P S T G G V K K P	Unmod H3 variant
538	H9	126147	126174	126181	126167	17.9536	16.945	0.000694822	0.000691324	170455	175567	177877	174633	3798.13	17.414	0.00154261	0.00201563	1.38414	0.468988	2.22015	1.15066	2.91561	1.5438		10	538	H9	A T G G V K K P H R Y R P	Unmod H3 variant
539	H10	111215	120939	105139	112431	7969.88	16.7787	0.000317582	0.000315983	161104	158287	121419	146937	22143.8	17.1648	0.000785457	0.00125884	1.30691	0.386155	2.47324	1.3064	3.98389	1.99418		10	539	H10	K K P H R Y R P G T V A L	Unmod H3 variant
540	H11	175075	196944	194746	188922	12041.8	17.5274	0.00241824	0.00240607	212560	208920	213431	211637	2392.95	17.6912	0.00255421	0.00302676	1.12024	0.163804	1.05623	0.0789209	1.25797	0.331096		10	540	H11	Y R P G T V A L R E I R R	Unmod H3 variant
541	H12	178860	179935	175536	178110	2293.32	17.4424	0.00212133	0.00211065	184790	185331	206031	192051	12110.3	17.5511	0.00201877	0.00249157	1.07827	0.108716	0.951652	-0.0714935	1.18047	0.239365		10	541	H12	V A L R E I R R Y Q K S T	Unmod H3 variant
542	H13	109369	111616	110375	110453	1125.55	16.7531	0.000263269	0.000261944	147235	147038	150034	148102	1675.77	17.1762	0.000817323	0.00129069	1.34086	0.423157	3.10452	1.63437	4.92736	2.30082		10	542	H13	I R RY Q K S T E L L I R	Unmod H3 variant
543	H14	130415	137027	151124	139522	10577.5	17.0901	0.00106158	0.00105624	189893	188425	189883	189400	844.678	17.5311	0.00194631	0.00241915	1.35749	0.440946	1.83341	0.874531	2.29035	1.19557		10	543	H14	K S T E L L I R K L P F Q	Unmod H3 variant
544	H15	111253	110070	110205	110509	647.562	16.7538	0.000264807	0.000263474	130715	133345	137497	133852	3419.35	17.0303	0.000427762	0.000901315	1.21123	0.276474	1.61537	0.691866	3.42089	1.77437		10	544	H15	L I R K L P F Q R L V R E	Unmod H3 variant
545	H16	127196	119780	128025	125000	4539.9	16.9316	0.000662772	0.000659436	144495	145921	157919	149445	7373.25	17.1893	0.000854029	0.00132738	1.19556	0.257683	1.28857	0.365771	2.0129	1.00928		10	545	H16	P F Q R L V R E I A Q D F	Unmod H3 variant
546	H17	103502	102340	99970	101937	1800.1	16.6373	2.93945e-05	2.92466e-05	134826	139421	139100	137782	2565.29	17.072	0.000535199	0.0010087	1.35164	0.434708	18.2074	4.18646	34.4896	5.10809		10	546	H17	V R E I A Q D F K T D L R	Unmod H3 variant
547	H18	120498	123126	132335	125320	6215.93	16.9353	0.000671542	0.000668162	163678	167842	170570	167363	3470.84	17.3526	0.00134387	0.00181699	1.33549	0.417371	2.00118	1.00085	2.71939	1.44328		10	547	H18	Q D F K T D L R F Q S S A	Unmod H3 variant
548	H19	208054	180169	166484	184902	21185.4	17.4964	0.00230786	0.00229624	232425	179923	182626	198325	29562.7	17.5975	0.00219028	0.002663	1.07259	0.101101	0.949055	-0.075436	1.15972	0.21378		10	548	H19	D L R F Q S S A V M A L Q	Unmod H3 variant
549	H20	163875	174175	166342	168131	5377.92	17.3592	0.00184726	0.00183796	190476	187741	203545	193921	8446.35	17.5651	0.00206989	0.00254266	1.15339	0.205884	1.12052	0.164168	1.38342	0.468236		10	549	H20	D L R F Q S A A I G A L Q	Unmod H3 variant
550	H21	98281	100473	105931	101562	3939.48	16.632	1.90776e-05	1.89816e-05	123611	132030	136156	130599	6393.75	16.9948	0.000338823	0.000812418	1.28591	0.362788	17.7603	4.15058	42.8004	5.41955		10	550	H21	A L Q E A C E A Y L V G L	Unmod H3 variant
551	H22	109192	109332	110560	109695	752.663	16.7431	0.000242434	0.000241213	137693	137961	141938	139197	2377.27	17.0868	0.000573881	0.00104737	1.26895	0.343638	2.36717	1.24316	4.34207	2.11838		10	551	H22	A L Q E A S E A Y L V G L	Unmod H3 variant
552	H23	118799	119698	104961	114486	8261.13	16.8048	0.000374018	0.000372135	147089	158892	125651	143877	16851.6	17.1345	0.000701822	0.00117525	1.25672	0.329668	1.87644	0.907997	3.15811	1.65906		10	552	H23	V G L F E D T N L C A I H	Unmod H3 variant
553	H24	139841	130977	136969	135929	4522.59	17.0525	0.000962906	0.000958059	154583	155922	157207	155904	1312.09	17.2503	0.0010306	0.00150387	1.14695	0.197805	1.0703	0.0980216	1.56971	0.650494		10	553	H24	D T N L C A I H A K R V T	Unmod H3 variant
554	H25	124400	120233	130013	124882	4907.78	16.9302	0.000659523	0.000656203	149100	152008	163212	154773	7451.34	17.2398	0.000999693	0.00147298	1.23936	0.309591	1.51578	0.600063	2.24469	1.16652		10	554	H25	A I H A K R V T I M P K D	Unmod H3 variant
555	H26	125755	128205	125543	126501	1479.51	16.9488	0.000703985	0.000700442	159116	158443	158810	158790	336.96	17.2768	0.00110949	0.00158272	1.25524	0.327968	1.57601	0.65628	2.2596	1.17607		10	555	H26	R V T I M P K D I Q L A R	Unmod H3 variant
556	H27	122321	119819	151597	131246	17669.1	17.0019	0.000834288	0.000830088	151371	145856	147777	148335	2799.47	17.1785	0.000823675	0.00129704	1.13021	0.176586	0.987279	-0.0184702	1.56253	0.643887		10	556	H27	D I Q L A R R I R G E R A	Unmod H3 variant
559	925	108769	111472	111716	110652	1635.57	16.7557	0.000268734	0.000267381	137370	139270	142606	139749	2650.62	17.0925	0.000588954	0.00106243	1.26295	0.336801	2.19158	1.13197	3.97346	1.9904		10	559	925	10% K G K G K G K G K G K G K	NEGCTRL-10
560	926	2695802	2623880	3460132	2.9266e+06	463446	21.4808	0.0776031	0.0772125	3354620	3964474	3304163	3.54109e+06	367532	21.7558	0.0935736	0.094003	1.20996	0.274964	1.2058	0.269987	1.21746	0.283873		10	560	926	10% Kac G Kac G Kac G Kac G Kac G Kac G Kac	POSCTRL-10
561	479	5822694	6482863	6245196	6.18358e+06	334369	22.56	0.167049	0.166209	5774861	5867675	5891678	5844738	61693.9	22.4787	0.15655	0.15695	0.945202	-0.081305	0.937149	-0.0936503	0.944294	-0.0826926		11	561	479	S G R G K G G K G L G K G	H4 1-13
562	480	184451	186936	185784	185724	1243.6	17.5028	0.00233041	0.00231868	212892	216321	217632	215615	2447.6	17.7181	0.00266296	0.00313546	1.16095	0.2153	1.1427	0.192446	1.35226	0.435369		11	562	480	Sph G R G K G G K G L G K G	H4 1-13	H4S1ph
563	481	639474	595069	572346	602296	34142.6	19.2001	0.0137707	0.0137014	577484	536320	552714	555506	20723.5	19.0834	0.0119548	0.0124229	0.922313	-0.116671	0.868131	-0.204016	0.906686	-0.141325		11	563	481	S G Rme G K G G K G L G K G	H4 1-13	H4R3me1
564	482	126970	127348	128084	127467	566.506	16.9598	0.000730524	0.000726846	153552	155739	155950	155080	1327.77	17.2427	0.00100809	0.00148136	1.21663	0.282888	1.37995	0.464615	2.03807	1.0272		11	564	482	S G Rme2a G K G G K G L G K G	H4 1-13	H4R3me2a
565	483	135422	130616	139807	135282	4597.11	17.0456	0.000945128	0.000940371	167785	170688	166172	168215	2288.5	17.3599	0.00136716	0.00184026	1.24344	0.31434	1.44653	0.532597	1.95696	0.968612		11	565	483	S G Rme2s G K G G K G L G K G	H4 1-13	H4R3me2s
566	484	130136	130935	137305	132792	3928.74	17.0188	0.000876755	0.000872341	157649	158814	162705	159723	2647.65	17.2852	0.001135	0.00160821	1.2028	0.266401	1.29454	0.372442	1.84356	0.882495		11	566	484	S G Rcit G K G G K G L G K G	H4 1-13	H4R3cit
567	485	141527	137740	138964	139410	1932.55	17.089	0.00105851	0.00105319	166722	166919	167672	167104	501.384	17.3504	0.00133679	0.00180992	1.19865	0.261412	1.2629	0.336737	1.71852	0.781163		11	567	485	S G R G Kac G G K G L G K G	H4 1-13	H4K5ac
568	486	371663	368284	347971	362639	12815	18.4682	0.00718904	0.00715285	359809	362529	366613	362984	3424.71	18.4695	0.00669168	0.00716226	1.00095	0.00136922	0.930817	-0.103431	1.00132	0.00189646		11	568	486	S G R G K G G Kac G L G K G	H4 1-13	H4K8ac	H4R3me1
569	487	5276125	5537763	5198772	5.33755e+06	177648	22.3477	0.143815	0.143091	4638131	5399173	16593134	8.87681e+06	6.69336e+06	23.0816	0.23944	0.2398	1.66309	0.733863	1.66492	0.735451	1.67586	0.7449		11	569	487	S G R G K G G K G L G Kac G	H4 1-13	H4K12ac	H4R3me2a
570	488	194830	199836	202992	199219	4115.8	17.604	0.00270104	0.00268745	230399	222883	228868	227383	3971.87	17.7948	0.00298468	0.00345702	1.14137	0.190769	1.10501	0.144059	1.28636	0.363292		11	570	488	Sph G Rme G K G G K G L G K G	H4 1-13	H4S1ph	H4R3me2s
571	489	212359	218174	210849	213794	3867.6	17.7059	0.00310131	0.0030857	245813	249957	243711	246494	3178.15	17.9112	0.00350711	0.00397921	1.15295	0.205329	1.13085	0.177407	1.28956	0.366884		11	571	489	Sph G Rme2a G K G G K G L G K G	H4 1-13	H4S1ph	H4R3cit
572	490	229026	235912	241772	235570	6379.88	17.8458	0.00369934	0.00368072	249159	261044	282717	264307	17015.2	18.0119	0.00399408	0.00446594	1.12199	0.166057	1.07967	0.110594	1.21333	0.278976		11	572	490	Sph G Rme2s G K G G K G L G K G	H4 1-13	H4S1ph	H4K5ac
573	491	177970	167474	153887	166444	12074.5	17.3447	0.00180093	0.00179186	242182	211959	205147	219763	19712.2	17.7456	0.00277635	0.00324879	1.32034	0.400912	1.54162	0.624448	1.81308	0.858442		11	573	491	Sph G Rcit G K G G K G L G K G	H4 1-13	H4S1ph	H4K8ac	H4K12ac
574	492	898794	978274	967473	948180	43109.4	19.8548	0.0232697	0.0231526	1268686	953892	995445	1.07267e+06	171018	20.0328	0.026093	0.0265544	1.1313	0.177979	1.12133	0.165207	1.14693	0.197775		11	574	492	Sph G R G Kac G G K G L G K G	H4 1-13	H4S1ph	H4K12ac
575	493	4470398	4935350	4398914	4601554	291277	22.1337	0.123602	0.12298	4337376	4161484	3977974	4.15894e+06	179714	21.9878	0.110464	0.110886	0.903813	-0.145904	0.893709	-0.162122	0.901657	-0.149349		11	575	493	Sph G R G K G G Kac G L G K G	H4 1-13	H4S1ph	H4K8ac
576	494	442496	477947	459754	460066	17727.6	18.8115	0.00986465	0.009815	482044	466339	477842	475408	8130.42	18.8588	0.00976511	0.0102342	1.03335	0.0473274	0.989909	-0.0146328	1.04271	0.0603429		11	576	494	Sph G R G K G G K G L G Kac G	H4 1-13	H4S1ph	H4K12ac
577	495	35811390	37005777	34405004	3.57407e+07	1.30183e+06	25.0911	0.978775	0.973849	35486716	33301758	30974868	3.32544e+07	2.2563e+06	24.987	0.905867	0.905912	0.930436	-0.104022	0.925511	-0.111678	0.930239	-0.104327		11	577	495	S G R G Kac G G Kac G L G K G	H4 1-13	H4K5ac	H4K12ac
578	496	10041212	9135101	9163024	9.44645e+06	515272	23.1713	0.256657	0.255365	8513681	8653131	8904225	8.69035e+06	197914	23.051	0.234342	0.234705	0.919959	-0.120358	0.913056	-0.131225	0.919095	-0.121713		11	578	496	S G R G Kac G G K G L G Kac G	H4 1-13	H4K5ac	H4K8ac
579	497	4797458	4739987	4936299	4.82458e+06	100927	22.202	0.129727	0.129074	4565661	4640972	4683049	4629894	59472.9	22.1425	0.123339	0.123754	0.959647	-0.0594246	0.950758	-0.0728504	0.958785	-0.0607206		11	579	497	S G R G K G G Kac G L G Kac G	H4 1-13	H4K8ac
580	498	15592887	15447036	16030096	1.569e+07	303420	23.9033	0.428124	0.425969	15382926	14979191	14767324	15043147	312745	23.8426	0.408013	0.408294	0.958773	-0.0607395	0.953026	-0.0694123	0.958506	-0.061141		11	580	498	S G R G Kac G G Kac G L G Kac G	H4 1-13	H4K5ac
581	499	486251	457296	490629	478059	18113.8	18.8668	0.0103588	0.0103067	463526	574197	500033	512585	56393.2	18.9674	0.0107814	0.0112501	1.07222	0.100605	1.0408	0.0576935	1.09154	0.12636		11	581	499	K G L G K G G G A K R H R	H4 8-19
582	500	776755	690341	586811	684636	95100.4	19.385	0.016032	0.0159513	739359	655063	672720	689047	44456.6	19.3942	0.0156055	0.0160719	1.00644	0.00926664	0.973396	-0.0389008	1.00756	0.0108618		11	582	500	Kac G L G K G G G A K R H R	H4 8-19	H4K8ac
583	501	513975	557324	568110	546470	28653.3	19.0598	0.0122376	0.012176	550582	545053	569928	555188	13061.4	19.0826	0.0119461	0.0124142	1.01595	0.0228341	0.976182	-0.0347782	1.01956	0.0279531		11	583	501	K G L G Kac G G G A K R H R	H4 8-19	H4K12ac
584	502	599527	544949	561784	568753	27948.5	19.1174	0.0128495	0.0127849	635623	610463	625802	623963	12680.4	19.2511	0.0138262	0.0142934	1.09707	0.133657	1.07601	0.105692	1.118	0.160917		11	584	502	K G L G K G G G A Kac R H R	H4 8-19	H4K16ac
585	503	186620	181605	200635	189620	9863.33	17.5328	0.00243742	0.00242515	217742	235286	255648	236225	18970.4	17.8498	0.0032264	0.00369863	1.24578	0.317053	1.3237	0.404571	1.52511	0.608916		11	585	503	K G L G K G G G A K Rme H R	H4 8-19	H4R17me1		H4K16ac
586	504	194058	196202	175988	188749	11103.5	17.5261	0.00241351	0.00240136	219783	211136	199380	210100	10240.9	17.6807	0.00251219	0.00298475	1.11311	0.154602	1.04089	0.0578116	1.24294	0.313759		11	586	504	K G L G K G G G A K Rme2a H R	H4 8-19	H4R17me2a
587	505	139966	139745	140116	139942	186.629	17.0945	0.00107312	0.00106772	182236	175246	176920	178134	3649.71	17.4426	0.00163832	0.0021113	1.27291	0.34813	1.52668	0.6104	1.97739	0.983594		11	587	505	K G L G K G G G A K Rme2s H R	H4 8-19	H4R17me2s	H4K12ac
588	506	226992	220710	221129	222944	3512.21	17.7663	0.00335258	0.00333571	262700	273003	262520	266074	6001.08	18.0215	0.0040424	0.00451424	1.19346	0.25515	1.20576	0.269939	1.35331	0.43649		11	588	506	K G L G K G G G A K Rcit H R	H4 8-19	H4R17cit	H4K16ac
589	507	1716748	1787319	1820805	1.77496e+06	53118.5	20.7594	0.0459755	0.045744	1727402	1608994	1783306	1.70657e+06	89004.1	20.7027	0.0434221	0.0438753	0.961469	-0.056687	0.944463	-0.0824337	0.959148	-0.0601747		11	589	507	Kac G L G Kac G G G A K R H R	H4 8-19	H4K8ac	H4K16ac
590	508	799771	880552	831187	837170	40721.5	19.6752	0.020221	0.0201193	950156	909123	919351	926210	21359.1	19.821	0.022089	0.0225523	1.10636	0.145819	1.09238	0.127468	1.12093	0.164694		11	590	508	Kac G L G K G G G A Kac R H R	H4 8-19	H4K8ac	H4K12ac
591	509	4222226	3148842	3855039	3.74204e+06	545542	21.8354	0.0999972	0.0994939	3815540	3867853	3576655	3.75335e+06	155241	21.8397	0.0993764	0.099803	1.00302	0.00435526	0.993791	-0.00898527	1.00311	0.00447572		11	591	509	K G L G Kac G G G A Kac R H R	H4 8-19	H4K12ac	H4R17me1
592	510	7807849	8128086	7941833	7959256	160828	22.9242	0.215815	0.214728	7997664	8415006	8368454	8.26037e+06	228702	22.9778	0.222588	0.222956	1.03783	0.0535736	1.03139	0.0445834	1.03832	0.0542485		11	592	510	Kac G L G Kac G G G A Kac R H R	H4 8-19	H4K8ac	H4R17me2a
593	511	863187	829641	845416	846081	16782.9	19.6904	0.0204658	0.0203628	840414	850019	801838	830757	25500.9	19.6641	0.0194795	0.019944	0.981888	-0.0263698	0.951809	-0.0712565	0.979436	-0.0299764		11	593	511	K G L G K G G G A Kac Rme H R	H4 8-19	H4K16ac	H4R17me2s
594	512	681702	694683	689098	688494	6511.52	19.3931	0.016138	0.0160567	759341	707133	704967	723814	30786.6	19.4653	0.0165559	0.0170218	1.0513	0.0721736	1.0259	0.036888	1.0601	0.0842071		11	594	512	K G L G K G G G A Kac Rme2a H R	H4 8-19	H4K16ac	H4R17cit
595	513	548595	613401	500460	554152	56675.2	19.0799	0.0124485	0.0123859	552273	557416	580624	563438	15104.3	19.1039	0.0121716	0.0126396	1.01676	0.0239743	0.977755	-0.0324553	1.02049	0.0292554		11	595	513	K G L G K G G G A Kac Rme2s H R	H4 8-19	H4K16ac
596	514	796433	735248	802824	778168	37307.2	19.5697	0.0186007	0.0185071	819405	797412	841825	819547	22206.8	19.6445	0.0191731	0.0196377	1.05317	0.074745	1.03077	0.0437246	1.06109	0.0855524		11	596	514	K G L G K G G G A Kac Rcit H R	H4 8-19	H4K16ac
597	515	166835	156909	158558	160767	5319.04	17.2946	0.00164504	0.00163676	175712	183341	188185	182413	6288.11	17.4768	0.00175529	0.00222821	1.13464	0.182232	1.06702	0.0935852	1.36136	0.445044		11	597	515	K R H R K V L R D N I Q G	H4 16-28
598	516	140066	129189	126665	131973	7121.17	17.0099	0.000854272	0.000849972	146119	147215	146452	146595	561.883	17.1615	0.000776125	0.00124951	1.1108	0.151593	0.908523	-0.138405	1.47007	0.55588		11	598	516	K R H Rme K V L R D N I Q G	H4 16-28	H4R19me1
599	517	211470	216408	200055	209311	8387.56	17.6753	0.00297819	0.0029632	221183	212341	203612	212379	8785.56	17.6963	0.00257449	0.00304702	1.01466	0.0209907	0.864447	-0.210151	1.02829	0.0402444		11	599	517	K R H Rme2a K V L R D N I Q G	H4 16-28	H4R19me2a
600	518	177404	186906	210684	191665	17142.7	17.5482	0.00249357	0.00248102	187244	195808	212659	198570	12930.7	17.5993	0.002197	0.00266972	1.03603	0.0510657	0.881066	-0.182678	1.07606	0.105753		11	600	518	K R H Rme2s K V L R D N I Q G	H4 16-28	H4R19me2s
601	519	177773	184700	167892	176788	8447.15	17.4317	0.00208502	0.00207453	179070	189703	177969	182247	6480.22	17.4755	0.00175077	0.00222369	1.03088	0.0438746	0.839687	-0.252076	1.0719	0.100175		11	601	519	K R H Rcit K V L R D N I Q G	H4 16-28	H4R19cit
602	520	131128	128218	131140	130162	1683.56	16.9899	0.000804527	0.000800477	139531	140721	137727	139326	1507.46	17.0881	0.000577408	0.00105089	1.07041	0.0981596	0.717699	-0.47855	1.31283	0.392679		11	602	520	K R H R Kme V L R D N I Q G	H4 16-28	H4K20me1
603	521	330179	345072	330946	335399	8385.84	18.3555	0.00644094	0.00640852	324721	311334	301856	312637	11488.1	18.2541	0.00531532	0.00578655	0.932135	-0.10139	0.825239	-0.277115	0.902947	-0.147287		11	603	521	K R H R Kme2 V L R D N I Q G	H4 16-28	H4K20me2
604	522	199317	172260	194453	188677	14423.8	17.5256	0.00241151	0.00239937	195442	201061	196830	197778	2926.92	17.5935	0.00217533	0.00264806	1.04824	0.0679635	0.902061	-0.148703	1.10364	0.142276		11	604	522	K R H R Kme3 V L R D N I Q G	H4 16-28	H4K20me3
605	523	608021	610668	591106	603265	10612.9	19.2024	0.0137973	0.0137279	564147	545224	602346	570572	29098	19.1221	0.0123667	0.0128346	0.945807	-0.0803821	0.896309	-0.157932	0.934927	-0.0970747		11	605	523	K R H R Kac V L R D N I Q G	H4 16-28	H4K20ac
606	524	198337	176368	171383	182029	14341.1	17.4738	0.00222896	0.00221774	172753	168220	166422	169132	3262.47	17.3678	0.00139222	0.00186531	0.929145	-0.106024	0.624604	-0.678985	0.841088	-0.249671		11	606	524	K R H R K V L Rme D N I Q G	H4 16-28	H4R23me1
607	525	249158	241659	256589	249135	7465.03	17.9266	0.00407189	0.00405139	264099	250873	245627	253533	9518.95	17.9518	0.00369955	0.00417155	1.01765	0.0252439	0.90856	-0.138346	1.02966	0.0421683		11	607	525	K R H R K V L Rme2a D N I Q G	H4 16-28	H4R23me2a
608	526	255663	219962	193185	222937	31345	17.7663	0.00335239	0.00333552	224476	205664	227620	219253	11873.2	17.7422	0.00276243	0.00323487	0.983478	-0.0240351	0.824016	-0.279256	0.969826	-0.0442022		11	608	526	K R H R K V L Rme2s D N I Q G	H4 16-28	H4R23me2s
609	527	273917	298574	329975	300822	28096.5	18.1986	0.00549135	0.00546371	293307	293323	315227	300619	12650.9	18.1976	0.00498677	0.00545817	0.999325	-0.000973885	0.908114	-0.139055	0.998985	-0.00146541		11	609	527	K R H R K V L Rcit D N I Q G	H4 16-28	H4R23cit
610	528	275336	270892	253884	266704	11322.6	18.0249	0.00455437	0.00453145	281114	253946	246692	260584	18145.7	17.9914	0.00389231	0.00436422	0.977053	-0.033491	0.854631	-0.226626	0.963096	-0.054248		11	610	528	K R H Rme Kme V L R D N I Q G	H4 16-28	H4R19me1	H4K20me1
611	529	349579	333980	330099	337886	10310.7	18.3662	0.00650924	0.00647648	339420	325825	331139	332128	6851.25	18.3414	0.00584816	0.00631914	0.982959	-0.0247972	0.898439	-0.154507	0.975707	-0.0354807		11	611	529	K R H Rme Kme2 V L R D N I Q G	H4 16-28	H4R19me1	H4K20me2
612	530	149783	148731	147088	148534	1358.26	17.1804	0.00130908	0.00130249	162959	161233	159256	161149	1852.92	17.298	0.001174	0.0016472	1.08493	0.117605	0.896814	-0.157119	1.26466	0.338744		11	612	530	K R H Rme Kme3 V L R D N I Q G	H4 16-28	H4R19me1	H4K20me3
613	531	372801	388881	407143	389608	17182.5	18.5717	0.00792969	0.00788977	403241	408747	407764	406584	2936.55	18.6332	0.00788361	0.00835363	1.04357	0.0615289	0.994189	-0.00840788	1.05879	0.0824191		11	613	531	K R H Rme Kac V L R D N I Q G	H4 16-28	H4R19me1	H4K20ac
614	532	340593	374416	370295	361768	18453.5	18.4647	0.00716511	0.00712905	331359	377753	388325	365812	30302.1	18.4807	0.00676901	0.00723956	1.01118	0.0160389	0.944718	-0.0820448	1.0155	0.0221922		11	614	532	K R H Rme2a Kme V L R D N I Q G	H4 16-28	H4R19me2a	H4K20me1
615	BLANK-11	130689	129915	124269	128291	3504.59	16.9691	0.000753144	0.000749353	136938	135208	135825	135990	876.77	17.0531	0.000486209	0.000959735	1.06001	0.0840841	0.645573	-0.631347	1.28075	0.356991		11	615			BLANK-11
616	481	291871	281973	288546	287463	5037.04	18.133	0.00512448	0.00509869	282776	276748	262415	273980	10459	18.0637	0.00425852	0.00473025	0.953094	-0.0693091	0.831013	-0.267056	0.927739	-0.108209		11	616	481	5% S G Rme G K G G K G L G K G	NEGCTRL-11
617	533	260893	267475	257366	261911	5130.86	17.9987	0.00442275	0.00440049	280443	280279	267880	276201	7206.38	18.0754	0.00431923	0.00479094	1.05456	0.0766383	0.976594	-0.0341693	1.08873	0.122645		12	617	533	K R H Rme2a Kme2 V L R D N I Q G	H4 16-28	H4R19me2a	H4K20me2
618	534	254259	249903	251519	251894	2202.04	17.9425	0.00414764	0.00412676	254456	253487	254944	254296	741.615	17.9561	0.0037204	0.00419239	1.00954	0.013692	0.896993	-0.156832	1.0159	0.0227648		12	618	534	K R H Rme2a Kme3 V L R D N I Q G	H4 16-28	H4R19me2a	H4K20me3
619	535	564427	520600	490113	525047	37356	19.0021	0.0116492	0.0115906	450728	453009	435565	446434	9481.67	18.7681	0.00897301	0.00944252	0.850275	-0.233999	0.770267	-0.376569	0.814671	-0.29571		12	619	535	K R H Rme2a Kac V L R D N I Q G	H4 16-28	H4R19me2a	H4K20ac
620	536	180085	171756	177373	176405	4248.1	17.4285	0.00207449	0.00206405	180035	179323	188551	182636	5134.61	17.4786	0.0017614	0.00223432	1.03533	0.0500851	0.849079	-0.23603	1.0825	0.114364		12	620	536	K R H Rme2s Kme V L R D N I Q G	H4 16-28	H4R19me2s	H4K20me1
621	537	207527	227058	226774	220453	11195.1	17.7501	0.00328418	0.00326765	215727	237475	242903	232035	14381.5	17.824	0.00311185	0.00358413	1.05254	0.0738713	0.947525	-0.077764	1.09685	0.133367		12	621	537	K R H Rme2s Kme2 V L R D N I Q G	H4 16-28	H4R19me2s	H4K20me2
622	538	416142	447975	397611	420576	25473.1	18.682	0.00878015	0.00873596	385120	404779	389308	393069	10355.1	18.5844	0.00751414	0.00798434	0.934597	-0.0975839	0.85581	-0.224638	0.913962	-0.129793		12	622	538	K R H Rme2s Kme3 V L R D N I Q G	H4 16-28	H4R19me2s	H4K20me3
623	540	1136657	1164759	1143068	1.14816e+06	14727.1	20.1309	0.0287618	0.028617	1039179	1048456	925506	1.00438e+06	68464.5	19.9379	0.024226	0.0246882	0.874773	-0.19302	0.842297	-0.247599	0.862712	-0.213049		12	623	540	K R H Rcit Kme V L R D N I Q G	H4 16-28	H4R19cit	H4K20me1
624	541	498290	457189	433207	462895	32914.6	18.8203	0.00994236	0.00989232	410258	403156	427469	413628	12501.9	18.658	0.00807617	0.0085461	0.893566	-0.162353	0.812298	-0.299918	0.863912	-0.211044		12	624	541	K R H Rcit Kme2 V L R D N I Q G	H4 16-28	H4R19cit	H4K20me2
625	542	567921	560102	643800	590608	46231.5	19.1718	0.0134497	0.013382	591841	775789	613130	660253	100621	19.3327	0.0148183	0.0152851	1.11792	0.16082	1.10176	0.139807	1.14221	0.191827		12	625	542	K R H Rcit Kme3 V L R D N I Q G	H4 16-28	H4R19cit	H4K20me3
626	543	2410174	2284485	2120328	2.27166e+06	145348	21.1153	0.0596164	0.0593164	2127799	2035097	1754991	1972629	194096	20.9117	0.0506956	0.0511454	0.868364	-0.203629	0.850363	-0.233849	0.862247	-0.213827		12	626	543	K R H Rcit Kac V L R D N I Q G	H4 16-28	H4R19cit	H4K20ac
627	544	468274	468383	449745	462134	10729.3	18.818	0.00992146	0.00987152	443893	464426	461363	456561	11076.9	18.8004	0.00924985	0.00971923	0.98794	-0.0175047	0.932308	-0.101121	0.984573	-0.0224302		12	627	544	N I Q G I T K P A I R R L	H4 25-37
628	545	687626	701512	692726	693955	7024.06	19.4045	0.0162879	0.016206	648443	630815	605857	628372	21397.9	19.2613	0.0139468	0.0144139	0.905494	-0.143223	0.856264	-0.223873	0.889421	-0.169062		12	628	545	N I Q G I T Kac P A I R R L	H4 25-37	H4K31ac
629	546	594637	599077	548512	580742	28000.1	19.1475	0.0131788	0.0131124	595001	629319	606666	610329	17449.7	19.2192	0.0134535	0.0139209	1.05095	0.071689	1.02085	0.0297659	1.06165	0.0863149		12	629	546	N I Q G I T Kme2 P A I R R L	H4 25-37	H4K31me2
630	547	901912	944246	970729	938962	34711.4	19.8407	0.0230166	0.0229007	805080	794991	854857	818309	32050.7	19.6423	0.0191392	0.0196039	0.871504	-0.198421	0.831541	-0.266141	0.856039	-0.224251		12	630	547	N I Q G I T Kme3 P A I R R L	H4 25-37	H4K31me3
631	548	690148	640243	649370	659920	26572.7	19.3319	0.0153533	0.015276	526885	528342	506740	520656	12073.3	18.99	0.0110021	0.0114706	0.788967	-0.341962	0.716595	-0.48077	0.750892	-0.413323		12	631	548	A R R G G V K R I S G L I	H4 38-50
632	549	162284	160421	160128	160944	1169.4	17.2962	0.0016499	0.0016416	178911	174901	157260	170357	11518.5	17.3782	0.00142572	0.0018988	1.05849	0.0820023	0.864127	-0.210685	1.15668	0.209992		12	632	549	A R R G G V Kme R I S G L I	H4 38-50	H4K44me1
633	550	269620	288346	281585	279850	9482.75	18.0943	0.00491541	0.00489067	261653	251358	259909	257640	5509.81	17.975	0.00381183	0.00428378	0.920635	-0.119299	0.775485	-0.366829	0.875908	-0.191148		12	633	550	A R R G G V Kme2 R I S G L I	H4 38-50	H4K44me2
634	551	123058	133779	132809	129882	5929.63	16.9868	0.000796837	0.000792827	156663	160123	154201	156996	2974.98	17.2604	0.00106045	0.0015337	1.20876	0.273523	1.33082	0.412314	1.93447	0.951939		12	634	551	A R R G G V Kme3 R I S G L I	H4 38-50	H4K44me3
635	552	214046	214879	208552	212492	3437.75	17.6971	0.00306556	0.00305013	210763	209801	209139	209901	816.605	17.6793	0.00250675	0.00297932	0.987805	-0.0177018	0.817715	-0.29033	0.976785	-0.0338864		12	635	552	A R R G G V Kac R I S G L I	H4 38-50	H4K44ac
636	553	4428037	1746504	2647833	2.94079e+06	1.36456e+06	21.4878	0.0779927	0.0776001	2607281	1434426	3299592	2.4471e+06	942844	21.2226	0.0636665	0.0641101	0.832123	-0.265132	0.816314	-0.292803	0.82616	-0.275506		12	636	553	A R R G G V K Rme I S G L I	H4 38-50	H4R45me1
637	554	171213	167638	167720	168857	2040.77	17.3654	0.00186721	0.00185781	174454	170756	167727	170979	3369.04	17.3835	0.00144272	0.00191579	1.01257	0.0180172	0.772662	-0.372092	1.03121	0.0443388		12	637	554	A R R G G V K Rme2a I S G L I	H4 38-50	H4R45me2a
638	555	132112	133102	137615	134276	2933.44	17.0348	0.000917519	0.0009129	152607	167076	167627	162437	8517.2	17.3095	0.00120919	0.00168237	1.20972	0.274672	1.31789	0.398232	1.84289	0.881969		12	638	555	A R R G G V K Rme2s I S G L I	H4 38-50	H4R45me2s
639	556	148909	154469	151142	151507	2797.88	17.209	0.00139071	0.00138371	173084	168202	167102	169463	3184.03	17.3706	0.00140126	0.00187436	1.11852	0.161586	1.00759	0.0109036	1.35458	0.43785		12	639	556	A R R G G V K Rcit I S G L I	H4 38-50	H4R45cit
640	557	1040740	1116174	1064220	1.07371e+06	38602.3	20.0342	0.0267172	0.0265827	1065413	1049319	1058731	1057821	8085.5	20.0127	0.0256869	0.0261485	0.985201	-0.0215107	0.961438	-0.056734	0.983666	-0.0237594		12	640	557	A R R G G V Kme Rme I S G L I	H4 38-50	H4K44me1	H4R45me1
641	558	699296	700556	731293	710382	18120.7	19.4382	0.0167391	0.0166548	702441	694215	695824	697493	4359.68	19.4118	0.0158364	0.0163026	0.981857	-0.0264149	0.946074	-0.0799757	0.978855	-0.0308333		12	641	558	A R R G G V Kme Rme2a I S G L I	H4 38-50	H4K44me1	H4R45me2a
642	559	243530	238288	246260	242693	4051.42	17.8888	0.00389495	0.00387535	252962	255060	269198	259073	8830.75	17.983	0.00385101	0.00432294	1.0675	0.09423	0.988719	-0.0163677	1.1155	0.157689		12	642	559	A R R G G V Kme Rme2s I S G L I	H4 38-50	H4K44me1	H4R45me2s
643	560	183053	179086	183969	182036	2595.5	17.4739	0.00222914	0.00221792	214986	202102	199374	205487	8338.4	17.6487	0.0023861	0.00285872	1.12883	0.174826	1.07041	0.0981645	1.28892	0.366163		12	643	560	A R R G G V Kme Rcit I S G L I	H4 38-50	H4K44me1	H4R45cit
644	561	151509	147897	145623	148343	2968.24	17.1786	0.00130383	0.00129727	172893	168781	166850	169508	3086.4	17.371	0.0014025	0.0018756	1.14268	0.192417	1.07568	0.105248	1.4458	0.531872		12	644	561	A R R G G V Kme2 Rme I S G L I	H4 38-50	H4K44me2	H4R45me1
645	562	137345	131681	127417	132148	4980.42	17.0118	0.000859059	0.000854735	153555	150038	136310	146634	9112.42	17.1619	0.000777192	0.00125058	1.10962	0.150072	0.904701	-0.144487	1.46312	0.549047		12	645	562	A R R G G V Kme2 Rme2a I S G L I	H4 38-50	H4K44me2	H4R45me2a
646	563	187227	195548	188486	190420	4485.09	17.5388	0.0024594	0.00244702	186982	214435	197276	199564	13868.8	17.6065	0.00222417	0.00269688	1.04802	0.0676664	0.904357	-0.145036	1.10211	0.140264		12	646	563	A R R G G V Kme2 Rme2s I S G L I	H4 38-50	H4K44me2	H4R45me2s
647	564	155323	154773	161183	157093	3552.7	17.2613	0.00154413	0.00153636	177368	186725	190978	185024	6962.68	17.4974	0.00182667	0.00229956	1.1778	0.236091	1.18297	0.242417	1.49676	0.58184		12	647	564	A R R G G V Kme2 Rcit I S G L I	H4 38-50	H4K44me2	H4R45cit
648	565	195681	187515	191113	191436	4092.59	17.5465	0.0024873	0.00247478	216105	220971	221690	219589	3038.29	17.7444	0.00277159	0.00324404	1.14706	0.197939	1.1143	0.156134	1.31084	0.390489		12	648	565	A R R G G V Kme3 Rme I S G L I	H4 38-50	H4K44me3	H4R45me1
649	566	199806	198111	189629	195849	5452.65	17.5794	0.00260848	0.00259535	213894	209805	208170	210623	2948.37	17.6843	0.00252649	0.00299905	1.07544	0.104924	0.96857	-0.0460715	1.15555	0.208579		12	649	566	A R R G G V Kme3 Rme2a I S G L I	H4 38-50	H4K44me3	H4R45me2a
650	567	140384	139304	135548	138412	2538.4	17.0786	0.0010311	0.00102591	152991	146043	146729	148588	3828.79	17.181	0.000830591	0.00130395	1.07352	0.102345	0.805542	-0.311969	1.27103	0.345993		12	650	567	A R R G G V Kme3 Rme2s I S G L I	H4 38-50	H4K44me3	H4R45me2s
651	568	133749	133215	132772	133245	489.206	17.0237	0.000889204	0.000884729	149638	151056	162786	154493	7216.57	17.2372	0.000992038	0.00146532	1.15947	0.21346	1.11565	0.157881	1.65624	0.727913		12	651	568	A R R G G V Kme3 Rcit I S G L I	H4 38-50	H4K44me3	H4R45cit
652	569	8524589	8171565	8766209	8.48745e+06	299056	23.0169	0.23032	0.229161	7502638	7827391	7981816	7770615	244582	22.8896	0.209199	0.209574	0.915541	-0.127303	0.908296	-0.138766	0.914526	-0.128905		12	652	569	A R R G G V Kac Rme I S G L I	H4 38-50	H4K44ac	H4R45me1
653	570	1618129	1515115	1633900	1589048	64511.6	20.5997	0.0408698	0.0406641	1548840	1437378	1413008	1.46641e+06	72420.1	20.4839	0.0368567	0.037313	0.922822	-0.115875	0.901808	-0.149108	0.917591	-0.124077		12	653	570	A R R G G V Kac Rme2a I S G L I	H4 38-50	H4K44ac	H4R45me2a
654	571	246731	246154	259227	250704	7386.77	17.9356	0.00411497	0.00409425	259979	256866	258616	258487	1560.5	17.9797	0.00383498	0.00430692	1.03104	0.0441067	0.93196	-0.10166	1.05194	0.0730567		12	654	571	A R R G G V Kac Rme2s I S G L I	H4 38-50	H4K44ac	H4R45me2s
655	572	410131	419096	361610	396946	30928.1	18.5986	0.00813119	0.00809026	380659	399297	370774	383577	14483.6	18.5492	0.00725464	0.00772496	0.96632	-0.0494266	0.892199	-0.164563	0.954846	-0.0666593		12	655	572	A R R G G V Kac Rcit I S G L I	H4 38-50	H4K44ac	H4R45cit
656	573	254441	273330	269571	265781	9998.68	18.0199	0.00452902	0.00450622	266863	277376	281388	275209	7501.05	18.0702	0.00429212	0.00476385	1.03547	0.0502915	0.947695	-0.077506	1.05717	0.0802092		12	656	573	G G V K R I S G L I Y E E	H4 41-53
657	574	132609	132651	135490	133583	1651.36	17.0274	0.000898487	0.000893964	167441	174112	170287	170613	3347.45	17.3804	0.00143272	0.0019058	1.27721	0.35299	1.59459	0.673189	2.13185	1.09211		12	657	574	G G V K R I Sph G L I Y E E	H4 41-53	H4S47ph
658	575	236517	239691	245265	240491	4428.53	17.8756	0.00383449	0.00381519	252271	249519	245605	249132	3349.84	17.9265	0.00357923	0.00405129	1.03593	0.0509255	0.933431	-0.0993843	1.06189	0.0866279		12	658	575	E T R G V L K V F L E N V	H4 53-65
659	576	128336	126449	126815	127200	1000.68	16.9567	0.000723182	0.000719542	136685	135052	137249	136329	1141.02	17.0567	0.000495459	0.00096898	1.07177	0.0999903	0.68511	-0.545593	1.34666	0.429388		12	659	576	E T R G V L Kac V F L E N V	H4 53-65	H4K59ac
660	577	191465	247006	179970	206147	35848.7	17.6533	0.0028913	0.00287675	182332	178027	182634	180998	2577.1	17.4656	0.0017166	0.00218955	0.878003	-0.187702	0.593714	-0.75216	0.76112	-0.393805		12	660	577	E T R G V L Kme V F L E N V	H4 53-65	H4K59me1
661	578	336011	327705	320587	328101	7719.62	18.3238	0.00624051	0.0062091	334163	348712	361045	347973	13456.2	18.4086	0.00628133	0.00675211	1.06057	0.0848368	1.00654	0.00940492	1.08745	0.120953		12	661	578	E T R G V L Kme2 V F L E N V	H4 53-65	H4K59me2
662	579	371885	378065	393985	381312	11402.1	18.5406	0.00770184	0.00766307	382328	388601	381465	384131	3894.82	18.5512	0.0072698	0.00774012	1.00739	0.010629	0.943905	-0.0832858	1.01005	0.0144328		12	662	579	E T R G V L Kme3 V F L E N V	H4 53-65	H4K59me3
663	H28	150991	152296	151290	151526	683.674	17.2092	0.00139124	0.00138423	165702	157333	157798	160278	4703.36	17.2902	0.00115017	0.00162338	1.05776	0.0810112	0.826724	-0.274522	1.17276	0.229913		12	663	H28	S G R G K G G K G L G K G	Unmod H4 variant
664	H29	223620	216258	183262	207713	21493	17.6642	0.00293432	0.00291955	225845	212507	228244	222199	8478.51	17.7615	0.00284294	0.00331535	1.06974	0.0972563	0.968861	-0.0456381	1.13557	0.183419		12	664	H29	G G K G L G K G G A K R H	Unmod H4 variant
665	H30	153120	159719	142634	151824	8615.88	17.212	0.00139944	0.00139239	177724	178322	188145	181397	5851.58	17.4688	0.00172752	0.00220046	1.19478	0.256748	1.23444	0.303856	1.58034	0.660237		12	665	H30	G K G G A K R H R K V L R	Unmod H4 variant
666	H31	178237	189307	182875	183473	5559.18	17.4852	0.0022686	0.00225719	217985	225796	231660	225147	6860.56	17.7805	0.00292354	0.00339592	1.22714	0.295299	1.2887	0.365914	1.50449	0.589276		12	666	H31	K R H R K V L R D N I Q G	Unmod H4 variant
667	H32	160860	161396	163115	161790	1178.08	17.3038	0.00167313	0.00166471	188921	179248	187420	185196	5205.79	17.4987	0.00183139	0.00230427	1.14467	0.19493	1.09458	0.130383	1.38419	0.46904		12	667	H32	V L R D N I Q G I T K P A	Unmod H4 variant
668	H33	164944	234060	152784	183929	43838.1	17.4888	0.00228114	0.00226965	171459	173799	162205	169154	6130.97	17.368	0.00139284	0.00186593	0.91967	-0.120811	0.610589	-0.711727	0.822122	-0.282576		12	668	H33	I Q G I T K P A I R R L A	Unmod H4 variant
669	H34	473498	354213	310448	379386	84389.6	18.5333	0.00764896	0.00761046	258905	346483	240125	281838	56766.5	18.1045	0.00447334	0.00494497	0.742878	-0.428803	0.584829	-0.773913	0.64976	-0.622022		12	669	H34	K P A I R R L A R R G G V	Unmod H4 variant
670	H35	168176	171601	178903	172893	5479.03	17.3995	0.00197806	0.0019681	196296	206538	212591	205142	8236.75	17.6463	0.00237665	0.00284928	1.18652	0.246738	1.20151	0.264844	1.44773	0.533792		12	670	H35	R L A R R G G V K R I S G	Unmod H4 variant
671	BLANK--12	131861	130833	160297	140997	16722.2	17.1053	0.00110209	0.00109654	173380	166337	144852	161523	14860.8	17.3014	0.00118421	0.00165741	1.14558	0.196075	1.07452	0.103689	1.51149	0.595969		12	671			BLANK-12
672	540	367197	367785	373547	369510	3508.77	18.4953	0.00737772	0.00734058	343837	335741	329195	336258	7334.66	18.3592	0.00596105	0.00643198	0.91001	-0.136045	0.80798	-0.307608	0.876222	-0.190631		12	672	540	10% K R H Rcit Kme V L R D N I Q G	NEGCTRL-12
673	H36	180509	192602	189062	187391	6217.26	17.5157	0.0023762	0.00236424	191770	203256	195439	196822	5866.5	17.5865	0.0021492	0.00262193	1.05033	0.0708374	0.904466	-0.144862	1.10899	0.149253		13	673	H36	G G V K R I S G L I Y E E	Unmod H4 variant
674	H37	148529	152209	153597	151445	2618.96	17.2084	0.00138902	0.00138203	162135	160134	161889	161386	1091.22	17.3002	0.00118047	0.00165366	1.06564	0.0917215	0.849856	-0.23471	1.19655	0.258878		13	674	H37	I S G L I Y E E T R G V L	Unmod H4 variant
675	H38	116809	121970	122604	120461	3178.57	16.8782	0.000538109	0.0005354	144452	146279	143652	144794	1346.54	17.1436	0.00072689	0.0012003	1.202	0.265439	1.35082	0.433839	2.24188	1.16471		13	675	H38	Y E E T R G V L K V F L E	Unmod H4 variant
676	H39	114993	115045	115404	115147	223.795	16.8131	0.00039218	0.000390206	127782	132942	130580	130435	2583.07	16.993	0.000334331	0.000807928	1.13276	0.179846	0.852493	-0.230241	2.07052	1.04999		13	676	H39	G V L K V F L E N V I R D	Unmod H4 variant
677	H40	115146	109825	103172	109381	5999.34	16.739	0.00023382	0.000232643	134462	125563	128713	129579	4512.31	16.9835	0.000310948	0.000784556	1.18466	0.244473	1.32986	0.411277	3.37237	1.75376		13	677	H40	F L E N V I R D A V T Y T	Unmod H4 variant
678	H41	155285	156647	158964	156965	1860.04	17.2601	0.00154063	0.00153287	185003	184251	184795	184683	388.309	17.4947	0.00181735	0.00229025	1.17658	0.234605	1.17962	0.238323	1.49409	0.579268		13	678	H41	I R D A V T Y T E H A K R	Unmod H4 variant
679	H42	163326	172311	169266	168301	4569.57	17.3607	0.00185194	0.00184261	183270	189363	200174	190936	8561.03	17.5427	0.00198829	0.0024611	1.13449	0.182043	1.07363	0.102491	1.33566	0.417549		13	679	H42	T Y T E H A K R K T V T A	Unmod H4 variant
680	H43	129152	129103	129216	129157	56.6657	16.9788	0.000776927	0.000773016	148642	144991	143975	145869	2454.35	17.1543	0.000756278	0.00122968	1.1294	0.175551	0.973423	-0.0388614	1.59075	0.669708		13	680	H43	A K R K T V T A M D V V Y	Unmod H4 variant
681	H44	156953	164373	141145	154157	11863.7	17.234	0.0014635	0.00145613	190927	196956	155380	181088	22466.6	17.4663	0.00171907	0.00219201	1.1747	0.232288	1.17463	0.232201	1.50536	0.590109		13	681	H44	V T A M D V V Y A L K R Q	Unmod H4 variant
682	H45	274994	216386	302002	264461	43769.1	18.0127	0.00449276	0.00447015	261082	247805	198198	235695	33145	17.8466	0.0032119	0.00368414	0.891229	-0.166132	0.714906	-0.484175	0.824164	-0.278997		13	682	H45	V V Y A L K R Q G R T L Y	Unmod H4 variant
683	H46	135341	129908	134634	133294	2953.88	17.0243	0.00089055	0.000886068	159473	162050	160982	160835	1294.77	17.2952	0.0011654	0.00163861	1.20662	0.270966	1.30863	0.388062	1.8493	0.886982		13	683	H46	L K R Q G R T L Y G F G G	Unmod H4 variant
692	580	119891	128215	133471	127192	6847.52	16.9567	0.000722971	0.000719332	142790	145818	149001	145870	3105.82	17.1543	0.000756287	0.00122968	1.14684	0.197668	1.04608	0.0649964	1.70948	0.773559		13	692	580	P E P A K S A P A P K K G	H2B 1-13
693	581	107043	164494	157257	142931	31290.1	17.125	0.00115521	0.0011494	127772	177412	185646	163610	31308.5	17.3199	0.00124127	0.00171443	1.14468	0.194939	1.07449	0.103657	1.4916	0.576857		13	693	581	P E P A Kac S A P A P K K G	H2B 1-13	H2BK5ac
694	582	172071	123055	130328	141818	26451	17.1137	0.00112464	0.00111897	175605	148493	150753	158284	15043.2	17.2722	0.00109566	0.00156889	1.1161	0.158472	0.974233	-0.0376605	1.40208	0.487571		13	694	582	P E P A K Sph A P A P K K G	H2B 1-13	H2BS6ph
695	583	127518	205299	190498	174438	41302.6	17.4124	0.00202049	0.00201032	168047	214393	230129	204190	32274.2	17.6396	0.00235062	0.00282326	1.17056	0.227193	1.16339	0.218339	1.40439	0.489941		13	695	583	P E P A K S A P A P Kac K G	H2B 1-13	H2BK11ac
696	584	187245	1372327	1667677	1.07575e+06	783510	20.0369	0.0267731	0.0266384	240317	1516613	1596216	1.11772e+06	760891	20.0921	0.0273243	0.0277851	1.03901	0.0552104	1.02059	0.0293965	1.04305	0.060804		13	696	584	P E P A Kac Sph A P A P K K G	H2B 1-13	H2BK5ac	H2BS6ph
697	585	1636040	1413803	2152280	1734041	378867	20.7257	0.0448518	0.044626	1413436	1626382	2351366	1.79706e+06	491708	20.7772	0.045896	0.046348	1.03634	0.0515016	1.02328	0.0332039	1.03859	0.054623		13	697	585	P E P A Kac S A P A P Kac K G	H2B 1-13	H2BK5ac	H2BK11ac
698	586	2453229	155638	148612	919160	1.32855e+06	19.81	0.0224727	0.0223596	1730103	176701	183985	696930	894762	19.4107	0.015821	0.0162872	0.758225	-0.399302	0.704008	-0.506336	0.728422	-0.457153		13	698	586	P E P A Kac Sph A P A P Kac K G	H2B 1-13	H2BK5ac	H2BS6ph	H2BK11ac
699	587	293080	147371	139363	193271	86529.5	17.5603	0.0025377	0.00252492	191346	174457	169445	178416	11474.7	17.4449	0.00164603	0.002119	0.923137	-0.115383	0.648631	-0.62453	0.839236	-0.252852		13	699	587	A P A P K K G S K K A V T	H2B 7-19
700	588	138348	157846	165162	153785	13860.5	17.2306	0.00145329	0.00144598	177562	178109	180880	178850	1778.89	17.4484	0.0016579	0.00213087	1.16299	0.217835	1.14079	0.190033	1.47365	0.559398		13	700	588	A P A P Kac K G S K K A V T	H2B 7-19	H2BK11ac
701	589	181626	218000	119634	173087	49735.9	17.4011	0.00198336	0.00197338	189977	208348	143546	180624	33398.2	17.4626	0.00170638	0.00217933	1.04354	0.0614923	0.860346	-0.217011	1.10436	0.143213		13	701	589	A P A P K Kac G S K K A V T	H2B 7-19	H2BK12ac
702	590	128298	114200	118507	120335	7224.58	16.8767	0.000534649	0.000531958	157624	145014	141726	148121	8392.15	17.1764	0.000817843	0.00129121	1.23091	0.299723	1.52968	0.613232	2.42728	1.27934		13	702	590	A P A P K K G S Kac K A V T	H2B 7-19	H2BK15ac
703	591	120252	157940	159677	145956	22277.5	17.1552	0.00123829	0.00123205	152528	193552	178095	174725	20718.6	17.4147	0.00154512	0.00201815	1.1971	0.259549	1.24779	0.319379	1.63804	0.711968		13	703	591	A P A P K K G S K Kac A V T	H2B 7-19	H2BK16ac
704	592	165026	233803	258494	219108	48435.8	17.7413	0.00324724	0.00323089	182253	326159	376063	294825	100633	18.1695	0.00482838	0.00529985	1.34557	0.428219	1.48692	0.572326	1.64037	0.714018		13	704	592	A P A P K K G Sph K K A V T	H2B 7-19	H2BS14ph
705	593	339095	1850236	2012137	1.40049e+06	922752	20.4175	0.0356915	0.0355118	338525	1744872	1780920	1.28811e+06	822558	20.2968	0.0319824	0.032441	0.919754	-0.12068	0.896079	-0.158303	0.913526	-0.130482		13	705	593	A P A P Kac Kac G S K K A V T	H2B 7-19	H2BK11ac	H2BK12ac
706	594	979607	458731	458178	632172	300888	19.27	0.0145912	0.0145178	1330207	457870	456566	748214	504021	19.5131	0.017223	0.0176886	1.18356	0.243134	1.18037	0.239237	1.21841	0.285		13	706	594	A P A P Kac K G S Kac K A V T	H2B 7-19	H2BK11ac	H2BK15ac
707	595	469032	3281621	2986740	2.2458e+06	1.54577e+06	21.0988	0.0589061	0.0586096	478249	3178675	2886998	2.18131e+06	1.48208e+06	21.0568	0.0564004	0.0568474	0.971284	-0.0420349	0.957463	-0.062712	0.969934	-0.0440421		13	707	595	A P A P Kac K G S K Kac A V T	H2B 7-19	H2BK11ac	H2BK16ac
708	596	3006529	294920	261561	1187670	1.57527e+06	20.1797	0.0298468	0.0296966	2851295	315643	383763	1183567	1.4447e+06	20.1747	0.0291245	0.0295845	0.996545	-0.00499265	0.9758	-0.0353431	0.996225	-0.0054569		13	708	596	A P A P K Kac G S Kac K A V T	H2B 7-19	H2BK12ac	H2BK15ac
709	597	316241	4158009	4922804	3.13235e+06	2.46862e+06	21.5788	0.0832535	0.0828344	379855	4660816	4750592	3.26375e+06	2.49793e+06	21.6381	0.085992	0.086425	1.04195	0.0592864	1.03289	0.0466913	1.04335	0.0612178		13	709	597	A P A P K Kac G S K Kac A V T	H2B 7-19	H2BK12ac	H2BK16ac
710	598	4890215	2524886	2511311	3308804	1.36956e+06	21.6579	0.0880994	0.087656	5019558	2208809	2509098	3.24582e+06	1.54342e+06	21.6302	0.0855017	0.085935	0.980965	-0.0277261	0.970514	-0.0431785	0.980367	-0.0286066		13	710	598	A P A P K K G S Kac Kac A V T	H2B 7-19	H2BK15ac	H2BK16ac
711	599	2956591	4405871	4478419	3.94696e+06	858452	21.9123	0.105625	0.105093	2107061	4223705	3776847	3.3692e+06	1.11565e+06	21.684	0.0888747	0.0893064	0.85362	-0.228334	0.841417	-0.249107	0.849781	-0.234837		13	711	599	A P A P Kac Kac G S Kac K A V T	H2B 7-19	H2BK11ac	H2BK12ac	H2BK15ac
712	600	4561720	3976889	3269422	3.93601e+06	647118	21.9083	0.105324	0.104794	3745197	3468508	3693003	3.63557e+06	147014	21.7937	0.0961565	0.0965847	0.923669	-0.114553	0.912956	-0.131382	0.921661	-0.117692		13	712	600	A P A P Kac K G S Kac Kac A V T	H2B 7-19	H2BK11ac	H2BK15ac	H2BK16ac
713	601	3512898	392314	430466	1445226	1.79076e+06	20.4629	0.0369201	0.0367342	4519532	435406	457945	1.80429e+06	2.35149e+06	20.783	0.0460937	0.0465457	1.24845	0.32014	1.24847	0.320166	1.26709	0.341522		13	713	601	A P A P K Kac G S Kac Kac A V T	H2B 7-19	H2BK12ac	H2BK15ac	H2BK16ac
714	602	418835	4065852	2153580	2.21276e+06	1.82423e+06	21.0774	0.0579987	0.0577068	474010	3201357	2136923	1937430	1.37457e+06	20.8857	0.0497334	0.0501836	0.875573	-0.1917	0.857491	-0.221806	0.869631	-0.201525		13	714	602	A P A P Kac Kac G S Kac Kac A V T	H2B 7-19	H2BK11ac	H2BK12ac	H2BK15ac	H2BK16ac
715	603	2414492	2571726	2475679	2487299	79258.4	21.2461	0.0655385	0.0652086	2661890	2698429	2420408	2.59358e+06	151076	21.3065	0.0676709	0.0681126	1.04273	0.0603625	1.03254	0.046193	1.04453	0.0628591		13	715	603	A P A P Kac Kac G Sph K K A V T	H2B 7-19	H2BK11ac	H2BK12ac	H2BS14ph
716	604	2558838	978223	1029395	1522152	898161	20.5377	0.0390327	0.0388362	2461429	984007	994878	1.4801e+06	849869	20.4973	0.0372312	0.0376873	0.972376	-0.0404132	0.953846	-0.0681718	0.970416	-0.0433248		13	716	604	A P A P Kac K G Sph Kac K A V T	H2B 7-19	H2BK11ac	H2BS14ph	H2BK15ac
717	605	903932	3021146	4048298	2657792	1.60336e+06	21.3418	0.0702207	0.0698672	1109606	4692638	4241360	3347868	1.95148e+06	21.6748	0.0882914	0.0887234	1.25964	0.333014	1.25734	0.330377	1.26989	0.344698		13	717	605	A P A P Kac K G Sph K Kac A V T	H2B 7-19	H2BK11ac	H2BS14ph	H2BK16ac
718	606	4762736	2007647	1816984	2.86246e+06	1.64845e+06	21.4488	0.0758414	0.0754596	4104796	1657809	1680188	2480931	1.40635e+06	21.2425	0.0645914	0.0650346	0.866714	-0.206372	0.851665	-0.231642	0.861846	-0.214498		13	718	606	A P A P K Kac G Sph Kac K A V T	H2B 7-19	H2BK12ac	H2BS14ph	H2BK15ac
719	607	1143089	3021886	3410696	2.52522e+06	1.21265e+06	21.268	0.06658	0.0662449	1147081	2260514	3122476	2.17669e+06	990362	21.0537	0.0562742	0.0567213	0.861979	-0.214275	0.845212	-0.242615	0.856237	-0.223918		13	719	607	A P A P K Kac G Sph K Kac A V T	H2B 7-19	H2BK12ac	H2BS14ph	H2BK16ac
720	608	3109879	4058249	4780901	3.98301e+06	838048	21.9254	0.106615	0.106078	3155337	4376005	4308451	3.9466e+06	686084	21.9122	0.104659	0.105083	0.990858	-0.0132495	0.981656	-0.0267107	0.990621	-0.0135954		13	720	608	A P A P K K G Sph Kac Kac A V T	H2B 7-19	H2BS14ph	H2BK15ac	H2BK16ac
721	609	4530716	4521729	4282063	4444836	141037	22.0837	0.119298	0.118698	4181025	7047662	5560862	5.59652e+06	1.43365e+06	22.4161	0.149764	0.150167	1.25911	0.332399	1.25538	0.328121	1.26512	0.339276		13	721	609	A P A P Kac Kac G Sph Kac K A V T	H2B 7-19	H2BK11ac	H2BK12ac	H2BS14ph	H2BK15ac
722	610	7986765	5944711	5255463	6.39565e+06	1.42039e+06	22.6087	0.172873	0.172003	6052805	5649662	4523731	5.40873e+06	792497	22.3669	0.144631	0.145036	0.84569	-0.2418	0.836629	-0.257341	0.843217	-0.246024		13	722	610	A P A P Kac K G Sph Kac Kac A V T	H2B 7-19	H2BK11ac	H2BS14ph	H2BK15ac	H2BK16ac
723	611	4775386	284722	308868	1.78966e+06	2.58574e+06	20.7713	0.0463792	0.0461457	4427028	292327	295060	1.67147e+06	2.38638e+06	20.6727	0.0424627	0.0429163	0.933961	-0.0985656	0.915555	-0.127282	0.930017	-0.104671		13	723	611	A P A P K Kac G Sph Kac Kac A V T	H2B 7-19	H2BK12ac	H2BS14ph	H2BK15ac	H2BK16ac
724	612	325618	192401	201979	239999	74302.4	17.8727	0.00382098	0.00380175	333846	225168	202337	253784	70269.5	17.9532	0.0037064	0.0041784	1.05743	0.0805688	0.970013	-0.0439239	1.09907	0.136288		13	724	612	A P A P Kac Kac G Sph Kac Kac A V T	H2B 7-19	H2BK11ac	H2BK12ac	H2BS14ph	H2BK15ac	H2BK16ac
725	613	197328	308868	325618	277271	69737.7	18.0809	0.00484458	0.0048202	224705	295060	333846	284537	55326.2	18.1183	0.00454713	0.00501873	1.0262	0.0373178	0.938601	-0.0914166	1.04119	0.05823		13	725	613	A V T K A Q K K D G K K R	H2B 17-29
726	614	192401	201979	197328	197236	4789.66	17.5896	0.00264658	0.00263326	225168	202337	224705	217403	13049.9	17.73	0.00271185	0.00318432	1.10225	0.140451	1.02466	0.0351504	1.20927	0.274139		13	726	614	A V T Kac A Q K K D G K K R	H2B 17-29	H2BK20ac
727	925	172526	160487	183661	172225	11589.9	17.3939	0.00195969	0.00194983	186286	225271	205261	205606	19494.8	17.6495	0.00238934	0.00286196	1.19382	0.255591	1.21924	0.285985	1.4678	0.553658		13	727	925	10% K G K G K G K G K G K G K	NEGCTRL-13
728	926	3349601	2943519	2696290	2996470	329859	21.5148	0.0795218	0.0791215	3115179	3113095	6921311	4383195	2.19807e+06	22.0636	0.116595	0.117013	1.46279	0.548719	1.4662	0.552082	1.47891	0.564531		13	728	926	10% Kac G Kac G Kac G Kac G Kac G Kac G Kac	POSCTRL-13
729	615	174404	167133	183858	175132	8386.21	17.4181	0.00203953	0.00202926	177453	171951	191141	180182	9881.71	17.4591	0.0016943	0.00216725	1.02884	0.0410123	0.830731	-0.267547	1.068	0.0949117		14	729	615	A V T K A Q Kac K D G K K R	H2B 17-29	H2BK23ac
730	616	656348	677428	672974	668917	11110.3	19.3515	0.0156003	0.0155218	666694	544965	549227	586962	69082.8	19.1629	0.0128147	0.0132824	0.877481	-0.188559	0.82144	-0.283773	0.855726	-0.224779		14	730	616	A V T K A Q K Kac D G K K R	H2B 17-29	H2BK24ac
731	617	324215	266221	257925	282787	36116.7	18.1094	0.00499606	0.00497091	261192	253374	248609	254392	6352.93	17.9567	0.00372303	0.00419502	0.899588	-0.152664	0.745192	-0.424315	0.843913	-0.244834		14	731	617	A V T K A Q K K D G Kac K R	H2B 17-29	H2BK27ac
732	618	985202	1059095	1007194	1.01716e+06	37941.9	19.9561	0.0251642	0.0250375	1146213	1087097	1163784	1.13236e+06	40175.3	20.1109	0.0277248	0.0281854	1.11326	0.154787	1.10175	0.139802	1.12572	0.170854		14	732	618	A V T K A Q K K D G K Kac R	H2B 17-29	H2BK28ac
733	619	230023	243814	273287	249041	22100.6	17.926	0.0040693	0.00404882	263578	273243	296340	277720	16833.7	18.0833	0.00436078	0.00483247	1.11516	0.157248	1.07163	0.0998032	1.19355	0.255258		14	733	619	A V T Kac A Q Kac K D G K K R	H2B 17-29	H2BK20ac	H2BK23ac
734	620	9013585	8868278	11059791	9647218	1.22548e+06	23.2017	0.262171	0.260851	8670295	8990658	9313546	8.9915e+06	321626	23.1001	0.242575	0.242934	0.93203	-0.101551	0.925256	-0.112076	0.931312	-0.102663		14	734	620	A V T Kac A Q K Kac D G K K R	H2B 17-29	H2BK20ac	H2BK24ac
735	621	524395	404066	343061	423841	92270.2	18.6932	0.00886981	0.00882516	421179	336961	366308	374816	42748.8	18.5158	0.00701515	0.00748558	0.884332	-0.177339	0.790902	-0.33843	0.848208	-0.237509		14	735	621	A V T Kac A Q K K D G Kac K R	H2B 17-29	H2BK20ac	H2BK27ac
736	622	779705	633462	661508	691558	77614.6	19.3995	0.0162221	0.0161405	651677	556837	601965	603493	47438.5	19.203	0.0132666	0.0137341	0.872657	-0.196514	0.817812	-0.29016	0.850911	-0.232919		14	736	622	A V T Kac A Q K K D G K Kac R	H2B 17-29	H2BK20ac	H2BK28ac
737	623	1303419	1254970	1148751	1.23571e+06	79111.7	20.2369	0.0311662	0.0310094	1224240	1270340	1600557	1.36505e+06	205257	20.3805	0.0340857	0.0345433	1.10466	0.143605	1.09367	0.129184	1.11396	0.155703		14	737	623	A V T K A Q Kac Kac D G K K R	H2B 17-29	H2BK23ac	H2BK24ac
738	624	2415042	2324213	2240591	2.32662e+06	87250.3	21.1498	0.0611256	0.0608179	2243019	2243130	2279782	2.25531e+06	21193.2	21.1049	0.0584235	0.0588695	0.969352	-0.0449067	0.955794	-0.0652288	0.967964	-0.0469753		14	738	624	A V T K A Q Kac K D G Kac K R	H2B 17-29	H2BK23ac	H2BK27ac
739	625	6511821	6911430	7863947	7.09573e+06	694649	22.7585	0.1921	0.191133	7611391	7449951	7643162	7568168	103604	22.8515	0.203665	0.204042	1.06658	0.0929925	1.0602	0.0843406	1.06754	0.0942905		14	739	625	A V T K A Q Kac K D G K Kac R	H2B 17-29	H2BK23ac	H2BK28ac
740	626	1693790	1478556	1536912	1.56975e+06	111312	20.5821	0.0403399	0.0401369	1264241	1469417	1675050	1.46957e+06	205405	20.487	0.0369431	0.0373994	0.936179	-0.0951438	0.915796	-0.126902	0.931796	-0.101913		14	740	626	A V T K A Q K Kac D G Kac K R	H2B 17-29	H2BK24ac	H2BK27ac
741	627	6196768	6215136	5751866	6054590	262327	22.5296	0.163507	0.162684	6394597	5758555	5673851	5.94233e+06	393954	22.5026	0.159218	0.159616	0.981459	-0.0269995	0.973771	-0.0383461	0.981145	-0.0274613		14	741	627	A V T K A Q K Kac D G K Kac R	H2B 17-29	H2BK24ac	H2BK28ac
742	628	9473361	11307398	11079012	1.06199e+07	999497	23.3403	0.288884	0.28743	10246781	10004566	10189170	10146839	126534	23.2745	0.274159	0.274503	0.955453	-0.065743	0.949029	-0.0754766	0.955026	-0.0663882		14	742	628	A V T K A Q K K D G Kac Kac R	H2B 17-29	H2BK27ac	H2BK28ac
743	629	4662922	4718779	4619403	4.66703e+06	49815.5	22.1541	0.1254	0.124769	4051538	4143714	3957797	4.05102e+06	92959.6	21.9499	0.107514	0.107937	0.868006	-0.204222	0.857365	-0.222019	0.865091	-0.209077		14	743	629	A V T Kac A Q Kac Kac D G K K R	H2B 17-29	H2BK20ac	H2BK23ac	H2BK24ac
744	630	4456227	4742939	4759521	4.6529e+06	170522	22.1497	0.125012	0.124383	3860797	4164500	4473429	4166242	306320	21.9903	0.110664	0.111085	0.895408	-0.159382	0.885225	-0.175884	0.893091	-0.163121		14	744	630	A V T Kac A Q K Kac D G Kac K R	H2B 17-29	H2BK20ac	H2BK24ac	H2BK27ac
745	631	1149672	1347988	1518207	1.33862e+06	184446	20.3523	0.0339924	0.0338213	1205534	1289332	1344873	1279913	70145.4	20.2876	0.0317584	0.0322171	0.956142	-0.0647032	0.934279	-0.098075	0.952568	-0.0701062		14	745	631	A V T Kac A Q K K D G Kac Kac R	H2B 17-29	H2BK20ac	H2BK27ac	H2BK28ac
746	632	691495	700930	831794	741406	78420	19.4999	0.0175911	0.0175026	722643	679945	824689	742426	74372.2	19.5019	0.0170647	0.0175304	1.00137	0.00198215	0.970078	-0.0438274	1.00159	0.00229403		14	746	632	A V T Kac A Q Kac K D G Kac K R	H2B 17-29	H2BK20ac	H2BK23ac	H2BK27ac
747	633	18572531	17671656	17810850	1.80183e+07	484959	24.103	0.492067	0.48959	17205558	17864511	16112130	17060733	885122	24.0242	0.463169	0.463423	0.946853	-0.0787869	0.941273	-0.0873148	0.946554	-0.0792429		14	747	633	A V T Kac A Q Kac K D G K Kac R	H2B 17-29	H2BK20ac	H2BK23ac	H2BK28ac
748	634	2224732	2304270	2162531	2230511	71046	21.0889	0.0584863	0.0581919	2281106	2079579	2026891	2129192	134173	21.0219	0.0549757	0.0554234	0.954576	-0.0670682	0.939976	-0.0893049	0.952424	-0.0703234		14	748	634	A V T Kac A Q K Kac D G K Kac R	H2B 17-29	H2BK20ac	H2BK24ac	H2BK28ac
749	635	7945597	7070822	7019807	7.34541e+06	520404	22.8084	0.198956	0.197955	8065664	7312455	6985150	7454423	554070	22.8297	0.200555	0.200934	1.01484	0.0212539	1.00804	0.0115457	1.01505	0.0215477		14	749	635	A V T K A Q Kac Kac D G Kac K R	H2B 17-29	H2BK23ac	H2BK24ac	H2BK27ac
750	636	6207628	5714385	6603339	6.17512e+06	445368	22.558	0.166817	0.165977	6154729	6228551	5951050	6.11144e+06	143725	22.5431	0.163841	0.164237	0.989689	-0.0149534	0.982162	-0.025967	0.989517	-0.015203		14	750	636	A V T K A Q Kac Kac D G K Kac R	H2B 17-29	H2BK23ac	H2BK24ac	H2BK28ac
751	637	11129288	12253916	11894564	11759256	574394	23.4873	0.320174	0.318562	11167640	11585334	12013268	1.15887e+07	422824	23.4662	0.313578	0.313903	0.9855	-0.0210722	0.979399	-0.0300312	0.985375	-0.0212558		14	751	637	A V T K A Q K Kac D G Kac Kac R	H2B 17-29	H2BK24ac	H2BK27ac	H2BK28ac
752	638	13427125	12963023	12098259	12829469	674425	23.613	0.349565	0.347805	12388326	12262924	12736674	1.24626e+07	245463	23.5711	0.337468	0.337782	0.971407	-0.0418516	0.965395	-0.0508094	0.971181	-0.0421881		14	752	638	A V T Kac A Q Kac Kac D G Kac K R	H2B 17-29	H2BK20ac	H2BK23ac	H2BK24ac	H2BK27ac
753	639	9370696	9861662	10446904	9.89309e+06	538792	23.238	0.268923	0.26757	10406035	10073577	9990302	10156638	219961	23.2759	0.274427	0.274771	1.02664	0.0379302	1.02047	0.0292298	1.02691	0.0383158		14	753	639	A V T Kac A Q K Kac D G Kac Kac R	H2B 17-29	H2BK20ac	H2BK24ac	H2BK27ac	H2BK28ac
754	640	12661035	14316944	11334260	1.27707e+07	1.49437e+06	23.6063	0.347952	0.346201	11205919	11459577	10466949	1.10441e+07	515708	23.3968	0.29869	0.299022	0.864801	-0.209561	0.858422	-0.220241	0.863724	-0.211357		14	754	640	A V T K A Q Kac Kac D G Kac Kac R	H2B 17-29	H2BK23ac	H2BK24ac	H2BK27ac	H2BK28ac
755	641	23685158	26444392	27718469	2.59493e+07	2.06172e+06	24.6292	0.709875	0.706302	24598960	26322680	25982019	25634553	912881	24.6116	0.697557	0.697701	0.987869	-0.0176081	0.982648	-0.0252535	0.987822	-0.0176772		14	755	641	A V T Kac A Q Kac K D G Kac Kac R	H2B 17-29	H2BK20ac	H2BK23ac	H2BK27ac	H2BK28ac
756	642	18906233	18526004	16948747	1.8127e+07	1.03795e+06	24.1116	0.495051	0.492559	20434386	16852912	16940273	18075857	2.04301e+06	24.1076	0.49092	0.491161	0.997179	-0.00407571	0.991657	-0.0120871	0.997163	-0.00409855		14	756	642	A V T Kac A Q Kac Kac D G Kac Kac R	H2B 17-29	H2BK20ac	H2BK23ac	H2BK24ac	H2BK27ac	H2BK28ac
757	H86	542416	605351	584853	577540	32098.5	19.1396	0.0130908	0.013025	539888	546491	557654	548011	8980	19.0638	0.0117499	0.0122181	0.948871	-0.075716	0.897566	-0.155911	0.938052	-0.0922604		14	757	H86	P E V S S K G A T I S K K	Unmod H2B variant
758	H87	317686	289339	289026	298684	16457.2	18.1883	0.00543263	0.00540528	310144	303250	288308	300567	11162.4	18.1973	0.00498536	0.00545675	1.00631	0.00906987	0.91767	-0.123953	1.00952	0.0136728		14	758	H87	P E P S K S A P A P K K G	Unmod H2B variant
759	H88	306244	459013	516303	427187	108586	18.7045	0.0089617	0.00891659	337992	508002	488579	444858	93056.5	18.763	0.00892992	0.00939945	1.04137	0.0584772	0.996454	-0.00512486	1.05415	0.0760835		14	759	H88	P E P A K S A P A P K K G	Unmod H2B variant
760	H89	938822	907840	888565	911742	25354.7	19.7983	0.022269	0.0221569	375474	338692	330082	348083	24109.1	18.4091	0.00628432	0.0067551	0.381777	-1.3892	0.2822	-1.82521	0.304875	-1.71371		14	760	H89	P E P T K S A P A P K K G	Unmod H2B variant
761	H90	968261	508002	399265	625176	302054	19.2539	0.0143991	0.0143266	276721	248331	250678	258577	15757.2	17.9802	0.00383743	0.00430937	0.413606	-1.27367	0.266506	-1.90776	0.300795	-1.73315		14	761	H90	P D P A K S A P A P K K G	Unmod H2B variant
762	H91	240693	219640	215067	225133	13667.7	17.7804	0.00341272	0.00339554	227825	272520	323971	274772	48112.5	18.0679	0.00428018	0.0047519	1.22049	0.287455	1.25418	0.326748	1.39945	0.484864		14	762	H91	P E P V K S A P V P K K G	Unmod H2B variant
763	H92	227086	217708	267800	237531	26629.5	17.8578	0.00375321	0.00373431	367912	333458	297058	332809	35431.5	18.3443	0.00586678	0.00633776	1.40112	0.486578	1.56314	0.644446	1.69717	0.763129		14	763	H92	P E L A K S A P A P K K G	Unmod H2B variant
764	H93	637909	707105	730282	691765	48059	19.3999	0.0162278	0.0161461	240005	227316	231081	232801	6516.95	17.8287	0.00313278	0.00360505	0.336531	-1.57119	0.19305	-2.37295	0.223276	-2.1631		14	764	H93	P K K G S K K A V T K A Q	Unmod H2B variant
765	H94	499597	497526	346173	447765	87987.6	18.7724	0.00952685	0.0094789	211503	200326	189704	200511	10900.7	17.6133	0.00225005	0.00272274	0.447804	-1.15906	0.23618	-2.08204	0.287243	-1.79966		14	765	H94	I S K K G F K K A V V K T	Unmod H2B variant
766	H95	314848	266331	245164	275448	35725.3	18.0714	0.0047945	0.00477037	186577	190634	182978	186730	3830.28	17.5106	0.0018733	0.00234617	0.677913	-0.560827	0.39072	-1.35579	0.491822	-1.02379		14	766	H95	A P K K G S K K A V T K A	Unmod H2B variant
767	H96	253511	268678	281493	267894	14007.5	18.0313	0.00458705	0.00456396	194240	204288	253179	217236	31530.7	17.7289	0.00270727	0.00317974	0.810902	-0.302401	0.590197	-0.76073	0.696706	-0.521379		14	767	H96	V P K K G S K K A I N K A	Unmod H2B variant
768	H97	165781	234302	247108	215730	43728.7	17.7189	0.00315449	0.00313861	190508	180483	172506	181166	9020.4	17.467	0.0017212	0.00219414	0.839778	-0.251919	0.545635	-0.873992	0.69908	-0.51647		14	768	H97	A P K K G S K K A I T K A	Unmod H2B variant
769	H98	269218	247813	231051	249361	19130.5	17.9279	0.00407807	0.00405755	161194	151450	153056	155233	5224.17	17.2441	0.00101227	0.00148554	0.622525	-0.683796	0.248222	-2.0103	0.366119	-1.44962		14	769	H98	K A Q K K D G K K R K R S	Unmod H2B variant
770	H99	192480	187274	166578	182111	13701.2	17.4745	0.00223119	0.00221996	162301	162385	162244	162310	70.9295	17.3084	0.00120573	0.00167891	0.891271	-0.166064	0.540397	-0.887909	0.75628	-0.403007		14	770	H99	K T Q K K E G K K R K R T	Unmod H2B variant
771	H100	161592	164461	163827	163293	1507.11	17.3171	0.00171441	0.00170578	178649	154710	159809	164389	12609.7	17.3268	0.00126257	0.00173573	1.00671	0.0096508	0.736446	-0.441348	1.01756	0.0251092		14	771	H100	D G K K R K R S R K E S Y	Unmod H2B variant
772	H101	225754	180039	245275	217023	33483	17.7275	0.00318998	0.00317392	178859	196168	187689	187572	8655.09	17.5171	0.00189633	0.00236919	0.864297	-0.210401	0.594466	-0.750334	0.746455	-0.421872		14	772	H101	E G K K R K R T R K E S Y	Unmod H2B variant
773	H102	131748	135204	138635	135196	3443.51	17.0447	0.000942766	0.000938021	133397	130325	130540	131421	1714.93	17.0038	0.000361285	0.00083487	0.972078	-0.0408567	0.383218	-1.38376	0.890034	-0.168068		14	773	H102	K R S R K E S Y S I Y V Y	Unmod H2B variant
774	H103	235497	209336	172593	205809	31600	17.6509	0.00288201	0.0028675	150905	160216	148519	153213	6180.72	17.2252	0.000957046	0.00143035	0.744445	-0.425762	0.332076	-1.59041	0.498814	-1.00343		14	774	H103	K R T R K E S Y S I Y I Y	Unmod H2B variant
775	H104	295707	138590	141775	192024	89806.2	17.5509	0.00250344	0.00249084	178425	147530	142161	156039	19572.1	17.2515	0.00103428	0.00150755	0.8126	-0.299383	0.413145	-1.27528	0.605238	-0.724426		14	775	H104	K V L K Q V H P D T G I S	Unmod H2B variant
776	H105	146413	137202	130291	137969	8088.3	17.074	0.00101892	0.00101379	146095	145810	155011	148972	5231.87	17.1847	0.000841098	0.00131446	1.07975	0.110701	0.825479	-0.276697	1.29657	0.374703		14	776	H105	V H P D T G I S S K A M G	Unmod H2B variant
777	H106	172619	268969	381474	274354	104532	18.0657	0.00476446	0.00474048	170540	167375	163778	167231	3383.3	17.3515	0.00134026	0.00181338	0.609545	-0.714196	0.281303	-1.8298	0.38253	-1.38635		14	777	H106	G I S S K A M G I M N S F	Unmod H2B variant
778	H107	216770	239431	221078	225760	12034.1	17.7844	0.00342992	0.00341266	145022	145427	145233	145227	202.559	17.148	0.000738727	0.00121213	0.643283	-0.636475	0.215377	-2.21506	0.355188	-1.49335		14	778	H107	G I S S K A M S I M N S F	Unmod H2B variant
779	H108	124549	120972	112469	119330	6205.14	16.8646	0.000507048	0.000504496	137440	132653	222158	164084	50350.8	17.3241	0.00125422	0.00172738	1.37504	0.459475	2.47356	1.30659	3.42397	1.77567		14	779	H108	A M G I M N S F V N D I F	Unmod H2B variant
780	H109	126298	124891	123703	124964	1299.04	16.9312	0.000661775	0.000658444	138629	138543	138914	138695	194.191	17.0816	0.000560158	0.00103365	1.10988	0.150407	0.846448	-0.240506	1.56984	0.650614		14	780	H109	A M S I M N S F V T D I F	Unmod H2B variant
781	H110	113570	109059	109925	110851	2393.92	16.7583	0.000274199	0.000272819	125940	128884	125477	126767	1847.93	16.9518	0.000234065	0.00070771	1.14358	0.193553	0.853632	-0.228315	2.59406	1.37521		14	781	H110	N S F V N D I F E R I A G	Unmod H2B variant
782	H111	109853	115522	115241	113539	3194.97	16.7928	0.000348001	0.00034625	127218	127507	128906	127877	902.78	16.9644	0.00026441	0.000738041	1.12629	0.171573	0.759796	-0.396316	2.13153	1.09189		14	782	H111	N S F V T D I F E R I A S	Unmod H2B variant
783	BLANK-14	112963	113072	112536	112857	283.286	16.7841	0.000329281	0.000327623	136579	128089	126214	130294	5523.12	16.9914	0.000330485	0.000804084	1.15451	0.207275	1.00366	0.00526691	2.4543	1.29531		14	783			BLANK-14
784	481	200671	194327	193856	196285	3805.97	17.5826	0.00262045	0.00260726	196560	207162	209082	204268	6744	17.6401	0.00235276	0.0028254	1.04067	0.0575157	0.897846	-0.15546	1.08367	0.115922		14	784	481	5% S G Rme G K G G K G L G K G	NEGCTRL-14
785	H112	113357	115973	116491	115274	1679.97	16.8147	0.000395649	0.000393658	144863	140218	144978	143353	2715.6	17.1292	0.000687488	0.00116092	1.24359	0.314509	1.73762	0.797111	2.94905	1.56025		15	785	H112	D I F E R I A G E A S R L	Unmod H2B variant
786	H113	115770	111681	113731	113727	2044.5	16.7952	0.000353183	0.000351405	142325	139255	141996	141192	1685.54	17.1073	0.000628411	0.00110187	1.2415	0.312079	1.77928	0.831294	3.13561	1.64875		15	786	H113	D I F E R I A S E A S R L	Unmod H2B variant
787	H114	121157	117477	116717	118450	2374.64	16.8539	0.00048289	0.00048046	150775	161965	156655	156465	5597.42	17.2555	0.00104594	0.0015192	1.32093	0.401558	2.166	1.11503	3.16197	1.66082		15	787	H114	I A G E A S R L A H Y N K	Unmod H2B variant
788	H115	133467	136467	137808	135914	2222.71	17.0523	0.000962494	0.000957649	161161	164940	151050	159050	7181.52	17.2791	0.00111662	0.00158984	1.17023	0.226789	1.16013	0.214284	1.66015	0.731315		15	788	H115	I A S E A S R L A H Y N K	Unmod H2B variant
789	H116	117271	104776	103275	108441	7684.03	16.7265	0.000207995	0.000206948	135019	131165	131757	132647	2075.43	17.0172	0.000394811	0.000868379	1.22322	0.290686	1.89817	0.92461	4.19612	2.06906		15	789	H116	I A S E A S R L A H Y S K	Unmod H2B variant
790	H117	117012	98500	114422	109978	10024.2	16.7469	0.000250215	0.000248955	144247	150424	2883371	1.05935e+06	1.57965e+06	20.0147	0.0257286	0.0261902	9.63236	3.26789	102.826	6.68406	105.2	6.717		15	790	H117	S R L A H Y N K R S T I T	Unmod H2B variant
791	H118	186118	191677	194123	190639	4102.14	17.5405	0.00246541	0.002453	223544	238601	242459	234868	9994.79	17.8415	0.00318929	0.00366154	1.232	0.301004	1.29361	0.371408	1.49268	0.577901		15	791	H118	S R L A H Y S K R S T I T	Unmod H2B variant
792	H119	119861	119203	121597	120220	1236.79	16.8753	0.0005315	0.000528824	163153	154719	147383	155085	7891.37	17.2427	0.00100821	0.00148149	1.29001	0.367378	1.89692	0.92366	2.80148	1.48619		15	792	H119	Y N K R S T I T S R E I Q	Unmod H2B variant
793	H120	125886	127851	124580	126106	1646.53	16.9443	0.000693128	0.000689639	141513	147026	145504	144681	2847.15	17.1425	0.000723792	0.0011972	1.1473	0.198242	1.04424	0.0624531	1.73599	0.795756		15	793	H120	Y S K R S T I S S R E I Q	Unmod H2B variant
794	H121	169229	178273	168958	172153	5301.52	17.3933	0.00195773	0.00194788	188378	188051	193355	189928	2972.37	17.5351	0.00196074	0.00243357	1.10325	0.141758	1.00154	0.00221397	1.24934	0.321168		15	794	H121	T I T S R E I Q T A V R L	Unmod H2B variant
795	H122	142007	136754	137901	138887	2761.91	17.0836	0.00104415	0.00103889	157444	154184	164347	158658	5189.18	17.2756	0.0011059	0.00157913	1.14235	0.192008	1.05914	0.0828911	1.52001	0.604082		15	795	H122	T I S S R E I Q T A V R L	Unmod H2B variant
796	H123	160228	156964	156032	157741	2203.36	17.2672	0.00156194	0.00155407	195089	193729	179383	189400	8701.87	17.5311	0.00194631	0.00241915	1.2007	0.263878	1.24609	0.317409	1.55665	0.638443		15	796	H123	E I Q T A V R L L L P G E	Unmod H2B variant
797	H124	166484	162948	171534	166989	4315.19	17.3494	0.0018159	0.00180676	190130	168299	166549	174993	13138.5	17.4169	0.00155244	0.00202546	1.04793	0.0675443	0.854918	-0.226142	1.12105	0.16485		15	797	H124	V R L L L P G E L A K H A	Unmod H2B variant
798	H125	174941	165766	163253	167987	6152.3	17.358	0.0018433	0.00183403	213896	200708	208622	207742	6637.89	17.6644	0.00244773	0.00292033	1.23666	0.306446	1.32791	0.409152	1.59231	0.671117		15	798	H125	P G E L A K H A V S E G T	Unmod H2B variant
799	H126	154176	153897	148486	152186	3207.62	17.2155	0.00140938	0.00140229	202603	179827	179163	187198	13345.5	17.5142	0.0018861	0.00235896	1.23006	0.298724	1.33825	0.420344	1.68223	0.750371		15	799	H126	K H A V S E G T K A V T K	Unmod H2B variant
800	H127	160421	150412	151941	154258	5391.79	17.235	0.00146627	0.00145889	177938	203749	188307	189998	12988.3	17.5356	0.00196265	0.00243548	1.23169	0.300639	1.33853	0.42065	1.6694	0.739331		15	800	H127	E G T K A V T K Y T S S K	Unmod H2B variant
801	H128	113082	111353	110606	111680	1270.04	16.769	0.000296966	0.000295471	143032	135619	130457	136369	6320.99	17.0572	0.00049657	0.000970091	1.22107	0.288144	1.67215	0.741701	3.2832	1.7151		15	801	H128	E G T K A V T K Y T S A K	Unmod H2B variant
812	643	172433	172699	167268	170800	3061.69	17.3819	0.00192057	0.0019109	220686	211509	210002	214066	5782.68	17.7077	0.00262061	0.00309312	1.25331	0.325745	1.3645	0.448369	1.61867	0.694812		15	812	643	S G R G K Q G G K A R A K	H2A 1-13
813	644	135660	137518	139956	137711	2154.52	17.0713	0.00101185	0.00100676	171825	184167	175767	177253	6303.76	17.4355	0.00161423	0.00208723	1.28713	0.364163	1.59532	0.673849	2.07321	1.05187		15	813	644	Sph G R G K Q G G K A R A K	H2A 1-13	H2AS1ph
814	645	168702	176120	165040	169954	5645.11	17.3748	0.00189733	0.00188778	205664	197028	175100	192597	15756.4	17.5552	0.00203371	0.00250651	1.13323	0.180443	1.07188	0.100143	1.32775	0.408985		15	814	645	S G Rme G K Q G G K A R A K	H2A 1-13	H2AR3me1
815	646	167549	155981	158035	160522	6171.9	17.2924	0.00163829	0.00163005	162552	260715	244134	222467	52546.1	17.7632	0.00285028	0.00332269	1.3859	0.470823	1.73979	0.79891	2.0384	1.02744		15	815	646	S G Rme2a G K Q G G K A R A K	H2A 1-13	H2AR3me2a
816	647	112327	117484	117096	115636	2871.95	16.8192	0.000405591	0.00040355	151360	152994	149826	151393	1584.26	17.2079	0.000907292	0.00138062	1.30923	0.388715	2.23696	1.16154	3.42118	1.7745		15	816	647	S G Rme2s G K Q G G K A R A K	H2A 1-13	H2AR3me2s
817	648	130205	135671	134397	133424	2859.87	17.0257	0.00089412	0.00088962	167836	178292	181906	176011	7307	17.4253	0.00158029	0.0020533	1.31918	0.399647	1.76742	0.821649	2.30806	1.20668		15	817	648	S G Rcit G K Q G G K A R A K	H2A 1-13	H2AR3cit
818	649	348895	331501	337665	339354	8819.1	18.3724	0.00654955	0.00651658	366355	375368	370663	370795	4507.96	18.5003	0.00690523	0.00737571	1.09265	0.127833	1.05431	0.0762945	1.13184	0.178668		15	818	649	S G R G Kac Q G G K A R A K	H2A 1-13	H2AK5ac
819	650	535535	553087	613963	567528	41160.1	19.1143	0.0128159	0.0127514	303282	298638	599220	400380	172216	18.611	0.00771401	0.00818411	0.70548	-0.503323	0.601909	-0.732382	0.641821	-0.639757		15	819	650	S G R G K Q G G Kac A R A K	H2A 1-13	H2AK9ac
820	653	294850	282021	296854	291242	8047.95	18.1519	0.00522825	0.00520193	291161	287955	280992	286703	5198.88	18.1292	0.00460633	0.00507791	0.984415	-0.0226614	0.881047	-0.182709	0.976158	-0.0348141		15	820	653	S G Rme G Kac Q G G K A R A K	H2A 1-13	H2AR3me1	H2AK5ac
821	654	402105	376094	376873	385024	14797.7	18.5546	0.00780379	0.00776451	394107	388214	423107	401809	18678.2	18.6162	0.00775308	0.00822316	1.0436	0.0615627	0.993502	-0.00940502	1.05907	0.0827988		15	821	654	S G Rme2a G Kac Q G G K A R A K	H2A 1-13	H2AR3me2a	H2AK5ac
822	655	232262	262766	238126	244385	16186.5	17.8988	0.00394142	0.00392158	269193	276396	276639	274076	4230.55	18.0642	0.00426115	0.00473289	1.12149	0.165422	1.08112	0.112528	1.20688	0.271286		15	822	655	S G Rme2s G Kac Q G G K A R A K	H2A 1-13	H2AR3me2s	H2AK5ac
823	656	367712	289681	285858	314417	46194.4	18.2623	0.00586471	0.00583519	375688	280341	202469	286166	86756.3	18.1265	0.00459166	0.00506324	0.910148	-0.135827	0.78293	-0.353044	0.867708	-0.204719		15	823	656	S G Rcit G Kac Q G G K A R A K	H2A 1-13	H2AR3cit	H2AK5ac
824	657	120610	115933	120202	118915	2590.53	16.8596	0.000495651	0.000493156	144450	141668	140112	142077	2197.68	17.1163	0.000652596	0.00112604	1.19477	0.256739	1.31664	0.396864	2.28334	1.19114		15	824	657	Sph G Rme G K Q G G K A R A K	H2A 1-13	H2AS1ph	H2AR3me1
825	658	177256	179019	187383	181219	5410.19	17.4674	0.00220671	0.0021956	192335	193820	199512	195222	3788.43	17.5748	0.00210547	0.00257823	1.07727	0.107381	0.954123	-0.0677531	1.17427	0.231764		15	825	658	Sph G Rme2a G K Q G G K A R A K	H2A 1-13	H2AS1ph	H2AR3me2a
826	659	149147	161211	222566	177641	39370.7	17.4386	0.00210845	0.00209784	185913	213606	314373	237964	67605.3	17.8604	0.00327393	0.00374614	1.33958	0.421776	1.55277	0.634842	1.78571	0.836501		15	826	659	Sph G Rme2s G K Q G G K A R A K	H2A 1-13	H2AS1ph	H2AR3me2s
827	660	204198	218396	156941	193178	32175.4	17.5596	0.00253514	0.00252238	326089	312797	174884	271257	83725.4	18.0493	0.00418408	0.00465585	1.40418	0.489725	1.65043	0.722843	1.84582	0.884258		15	827	660	Sph G Rcit G K Q G G K A R A K	H2A 1-13	H2AS1ph	H2AR3cit
828	661	658241	687774	664326	670114	15594	19.354	0.0156332	0.0155545	413774	642731	653925	570143	135535	19.121	0.0123549	0.0128228	0.850816	-0.233081	0.790302	-0.339524	0.824381	-0.278616		15	828	661	S G R G Kac Q G G Kac A R A K	H2A 1-13	H2AK5ac	H2AK9ac
829	662	283199	343200	322807	316402	30509	18.2714	0.00591923	0.00588943	324196	342780	327820	331599	9851.4	18.3391	0.00583368	0.00630468	1.04803	0.0676795	0.985549	-0.0210011	1.07051	0.0982939		15	829	662	Sph G R G Kac Q G G K A R A K	H2A 1-13	H2AS1ph	H2AK5ac
830	663	609133	601684	640623	617147	20669.4	19.2353	0.0141786	0.0141072	628683	609421	752728	663611	77776.5	19.34	0.0149101	0.0153768	1.07529	0.104724	1.0516	0.0725806	1.09	0.124325		15	830	663	Sph G R G K Q G G Kac A R A K	H2A 1-13	H2AS1ph	H2AK9ac
831	664	28140690	27370899	30048767	2.85201e+07	1.37867e+06	24.7655	0.780476	0.776548	24928204	23771556	26666957	25122239	1.45742e+06	24.5825	0.683552	0.683702	0.88086	-0.183015	0.875814	-0.191304	0.880437	-0.183708		15	831	664	Sph G R G Kac Q G G Kac A R A K	H2A 1-13	H2AS1ph	H2AK5ac	H2AK9ac
832	665	4628985	4662141	5303216	4.86478e+06	380058	22.2139	0.130831	0.130173	2598741	2653771	4471598	3241370	1.06576e+06	21.6282	0.08538	0.0858133	0.666293	-0.585771	0.652597	-0.615735	0.659228	-0.601152		15	832	665	R A K A K T R S S R A G L	H2A 11-23
833	666	221301	221997	210959	218086	6181.68	17.7345	0.00321917	0.00320297	222486	224369	226432	224429	1973.68	17.7759	0.00290392	0.0033763	1.02909	0.0413642	0.90207	-0.148689	1.05412	0.0760328		15	833	666	R A Kac A K T R S S R A G L	H2A 11-23	H2AK13ac
834	667	467602	422110	434668	441460	23494.2	18.7519	0.00935369	0.00930661	467995	487940	501623	485853	16910.9	18.8902	0.0100506	0.0105196	1.10056	0.138236	1.07451	0.103679	1.13034	0.176756		15	834	667	R A K A Kac T R S S R A G L	H2A 11-23	H2AK15ac
835	668	168185	180405	192412	180334	12113.7	17.4603	0.0021824	0.00217141	197233	254092	255120	235482	33128.3	17.8453	0.00320607	0.00367831	1.30581	0.384943	1.46906	0.554892	1.69397	0.760408		15	835	668	R A K A K Tph R S S R A G L	H2A 11-23	H2AT16ph
836	669	329556	332563	334631	332250	2551.94	18.3419	0.00635446	0.00632247	444642	312012	248876	335177	99917.6	18.3546	0.0059315	0.00640244	1.00881	0.0126525	0.933439	-0.0993726	1.01265	0.0181336		15	836	669	R A K A Kac Tph R S S R A G L	H2A 11-23	H2AK15ac	H2AT16ph
837	671	358054	359580	349163	355599	5625.72	18.4399	0.00699569	0.00696048	340625	382507	338449	353860	24832.6	18.4328	0.00644227	0.00691297	0.995111	-0.00707122	0.920891	-0.118898	0.993175	-0.00988084		15	837	671	R A Kac A Kac T R S S R A G L	H2A 11-23	H2AK13ac	H2AK15ac
838	672	284252	283627	277492	281790	3735.56	18.1043	0.00496869	0.00494368	318137	365750	379596	354494	32238.5	18.4354	0.0064596	0.00693029	1.25801	0.33114	1.30006	0.37858	1.40185	0.487332		15	838	672	R A Kac A Kac Tph R S S R A G L	H2A 11-23	H2AK13ac	H2AK15ac	H2AT16ph
839	BLANK-15	145311	125019	133627	134652	10184.8	17.0389	0.000927845	0.000923175	158653	158865	170103	162540	6550.32	17.3104	0.00121202	0.00168521	1.20711	0.271559	1.30628	0.385463	1.82545	0.86825		15	839			BLANK-15
840	540	479122	445562	439561	454748	21320.4	18.7947	0.00971862	0.00966971	494288	502935	368844	455356	75045.9	18.7966	0.00921691	0.0096863	1.00134	0.00192549	0.948376	-0.0764686	1.00172	0.00247384		15	840	540	5% S G Rme G K G G K G L G K G	NEGCTRL-15
841	H47	184398	189592	225159	199716	22186.5	17.6076	0.00271469	0.00270103	197985	215519	208204	207236	8806.99	17.6609	0.0024339	0.0029065	1.03765	0.0533223	0.896565	-0.15752	1.07607	0.105775		15	841	H47	S G R G K Q G G K A R A K	Unmod H2A variant
842	H48	167837	148862	147549	154749	11353.2	17.2396	0.00147977	0.00147232	173750	178627	188224	180200	7364.15	17.4592	0.00169481	0.00216776	1.16447	0.219668	1.14532	0.195751	1.47234	0.558115		16	842	H48	Q G G K A R A K S K S R S	Unmod H2A variant
843	H49	140117	147479	162741	150112	11539.6	17.1957	0.00135242	0.00134561	181833	195419	199659	192304	9312.39	17.553	0.00202568	0.00249848	1.28107	0.357344	1.49782	0.582864	1.85676	0.892786		16	843	H49	Q G G K A R A K A K S R S	Unmod H2A variant
844	H50	163084	151194	150857	155045	6964.02	17.2423	0.00148789	0.0014804	199953	189708	178756	189472	10600.5	17.5316	0.00194828	0.00242112	1.22205	0.2893	1.30943	0.388937	1.63545	0.709686		16	844	H50	Q G G K A R A K A K T R S	Unmod H2A variant
845	H51	130254	117053	121444	122917	6722.64	16.9073	0.000605558	0.00060251	154626	137306	139290	143741	9479.03	17.1331	0.000698085	0.00117151	1.16941	0.225784	1.1528	0.205139	1.94438	0.959313		16	845	H51	R A K S K S R S S R A G L	Unmod H2A variant
846	H52	140486	135698	133954	136713	3382.15	17.0608	0.000984428	0.000979473	155622	159496	164705	159941	4557.82	17.2872	0.00114096	0.00161418	1.16991	0.226393	1.15901	0.212897	1.64801	0.720725		16	846	H52	R A K A K S R S S R A G L	Unmod H2A variant
847	H53	147228	176500	192494	172074	22955.3	17.3927	0.00195555	0.00194571	185775	176801	201074	187883	12273.1	17.5195	0.00190484	0.0023777	1.09188	0.126808	0.974068	-0.0379053	1.22202	0.289267		16	847	H53	R A K A K T R S S R A G L	Unmod H2A variant
848	H54	131850	132745	131635	132077	588.692	17.011	0.000857109	0.000852795	172475	163108	156662	164082	7951.34	17.3241	0.00125416	0.00172732	1.24232	0.313038	1.46324	0.549171	2.02548	1.01827		16	848	H54	R S S R A G L Q F P V G R	Unmod H2A variant
849	H55	175668	180527	548244	301480	213718	18.2017	0.00550941	0.00548168	201977	206319	167429	191908	21310.6	17.5501	0.00201488	0.00248768	0.636555	-0.651643	0.365715	-1.45121	0.453816	-1.13982		16	849	H55	A G L Q F P V G R V H R L	Unmod H2A variant
850	H56	166997	161102	165385	164495	3046.68	17.3277	0.0017474	0.00173861	185840	192719	187726	188762	3554.52	17.5262	0.00192885	0.0024017	1.14752	0.198525	1.10384	0.142532	1.38139	0.466121		16	850	H56	A G L Q F P V G R I H R L	Unmod H2A variant
851	H57	181125	170397	206237	185920	18394.8	17.5043	0.0023358	0.00232404	191429	188321	193773	191174	2734.91	17.5445	0.00199481	0.00246762	1.02826	0.0402095	0.854017	-0.227663	1.06178	0.0864867		16	851	H57	P V G R V H R L L R K G N	Unmod H2A variant
852	H58	187471	184874	184830	185725	1512.24	17.5028	0.00233045	0.00231872	213246	208490	207946	209894	2915.63	17.6793	0.00250656	0.00297913	1.13013	0.176493	1.07557	0.105102	1.28482	0.361563		16	852	H58	P V G R I H R L L R K G N	Unmod H2A variant
853	H59	213960	211614	211626	212400	1351.01	17.6964	0.00306302	0.00304761	237353	241323	230937	236538	5240.78	17.8517	0.00323494	0.00370716	1.11364	0.155286	1.05613	0.0787814	1.21642	0.282638		16	853	H59	H R L L R K G N Y A E R V	Unmod H2A variant
854	H60	174889	179472	190038	181466	7768.92	17.4693	0.0022135	0.00220235	200582	214741	204740	206688	7277.66	17.6571	0.00241891	0.00289152	1.13899	0.18775	1.0928	0.128031	1.31292	0.392782		16	854	H60	H R L L R K G N Y S E R V	Unmod H2A variant
855	H61	121624	117171	114772	117856	3476.93	16.8467	0.000466559	0.00046421	148342	142127	144562	145010	3131.66	17.1458	0.000732795	0.0012062	1.23041	0.299135	1.57064	0.651351	2.5984	1.37762		16	855	H61	H RL L R K G N Y A E R I	Unmod H2A variant
856	H62	138495	162406	165705	155535	14849.3	17.2469	0.00150135	0.0014938	168170	177902	179641	175238	6182.23	17.419	0.00155914	0.00203216	1.12667	0.172071	1.03849	0.0544868	1.3604	0.444028		16	856	H62	K G N Y A E R V G A G A P	Unmod H2A variant
857	H63	140205	240836	132753	171265	60365.6	17.3859	0.00193333	0.0019236	157071	160102	151186	156120	4533.49	17.2523	0.0010365	0.00150976	0.91157	-0.133575	0.536122	-0.899368	0.784865	-0.349484		16	857	H63	K G N Y S E R V G A G A P	Unmod H2A variant
858	H64	169497	144023	142587	152036	15139	17.2141	0.00140524	0.00139817	179404	155864	163219	166162	12042.9	17.3422	0.00131104	0.00178418	1.09292	0.128184	0.932965	-0.100106	1.27608	0.351719		16	858	H64	K G N Y A E R I G A G A P	Unmod H2A variant
859	H65	103115	98927	100559	100867	2110.92	16.6221	0	0	122873	122899	127432	124401	2624.67	16.9246	0.000169393	0.000643069	1.23332	0.302548	#DIV/0!	#DIV/0!	#DIV/0!	#DIV/0!		16	859	H65	G A G A P V Y L A A V L E	Unmod H2A variant
860	H66	96954	99794	107226	101325	5304.31	16.6286	1.25689e-05	1.25056e-05	121819	122957	136727	127168	8298.16	16.9564	0.000245018	0.000718658	1.25505	0.327746	19.4941	4.28496	57.4669	5.84466		16	860	H66	G A G A P V Y M A A V L E	Unmod H2A variant
861	H67	115431	115806	118836	116691	1867.06	16.8323	0.000434574	0.000432386	148286	146108	141731	145375	3338.41	17.1494	0.000742764	0.00121617	1.24581	0.317086	1.70918	0.773304	2.81269	1.49195		16	861	H67	L A A V L E Y L T A E I L	Unmod H2A variant
862	H68	109375	105222	103004	105867	3234.1	16.6919	0.000137315	0.000136624	129029	126283	126367	127226	1561.72	16.957	0.000246622	0.000720261	1.20176	0.265144	1.79604	0.844816	5.27187	2.39831		16	862	H68	M A A V L E Y L T A E I L	Unmod H2A variant
863	H69	104570	103021	98531	102041	3136.59	16.6388	3.22323e-05	3.20701e-05	119023	119390	116202	118205	1744.33	16.8509	0	0.000473756	1.15841	0.212147	0	#NUM!	14.7725	3.88484		16	863	H69	Y L T A E I L E L A G N A	Unmod H2A variant
864	H70	111839	111493	110342	111225	783.744	16.7631	0.000284452	0.00028302	135645	132304	139896	135948	3805.08	17.0527	0.000485061	0.000958587	1.22229	0.289582	1.70525	0.769982	3.38699	1.76		16	864	H70	I L E L A G N A A R D N K	Unmod H2A variant
865	H71	126447	129012	125262	126907	1916.85	16.9534	0.000715135	0.000711536	148805	157101	155560	153822	4412.64	17.2309	0.000973686	0.00144698	1.21208	0.27749	1.36154	0.44524	2.0336	1.02404		16	865	H71	I L E L A G N A S R D N K	Unmod H2A variant
866	H72	155751	149875	140207	148611	7848.71	17.1812	0.00131119	0.00130459	172230	172649	169356	171412	1792.54	17.3871	0.00145455	0.00192761	1.15343	0.205924	1.10933	0.149691	1.47756	0.563218		16	866	H72	G N A A R D N K K T R I I	Unmod H2A variant
867	H73	181761	148203	149408	159791	19036.4	17.2858	0.00161822	0.00161007	161581	161230	160971	161261	306.154	17.299	0.00117704	0.00165024	1.0092	0.0132114	0.727369	-0.45924	1.02495	0.0355501		16	867	H73	G N A S R D N K K T R I I	Unmod H2A variant
868	H74	140771	131334	135146	135750	4747.44	17.0506	0.000957999	0.000953177	154863	156732	161154	157583	3230.68	17.2658	0.0010765	0.00154975	1.16083	0.215156	1.1237	0.168256	1.62588	0.701218		16	868	H74	D N K K T R I I P R H L Q	Unmod H2A variant
869	H75	156983	178493	161188	165555	11400.5	17.3369	0.00177651	0.00176757	177527	183907	212005	191146	18343.6	17.5443	0.00199405	0.00246686	1.15458	0.20737	1.12245	0.16665	1.39562	0.480905		16	869	H75	R I P R H L Q L A I R N	Unmod H2A variant
870	H76	160174	169742	163957	164624	4818.78	17.3288	0.00175096	0.00174215	190313	195409	194024	193249	2634.99	17.5601	0.00205152	0.0025243	1.17388	0.231281	1.17165	0.228543	1.44896	0.535015		16	870	H76	L Q L A I R N D E E L N K	Unmod H2A variant
871	H77	154564	136976	136277	142606	10362.1	17.1217	0.00114627	0.0011405	186235	156109	159393	167246	16527	17.3516	0.00134066	0.00181378	1.17278	0.229938	1.16959	0.225998	1.59034	0.669335		16	871	H77	R N D E E L N K L L G G V	Unmod H2A variant
872	H78	112840	113229	116467	114179	1991.28	16.8009	0.000365578	0.000363737	131359	134421	136668	134149	2664.91	17.0335	0.000435881	0.00090943	1.17491	0.232547	1.19231	0.253756	2.50024	1.32207		16	872	H78	R N D E E L N K L L G K V	Unmod H2A variant
873	H79	140468	132637	153405	142170	10488.1	17.1173	0.0011343	0.00112859	150494	158723	163506	157574	6581.61	17.2657	0.00107627	0.00154951	1.10835	0.148415	0.948835	-0.0757706	1.37296	0.457289		16	873	H79	R N D E E L N K L L G R V	Unmod H2A variant
874	H80	157640	159779	162761	160060	2572.04	17.2883	0.00162561	0.00161743	187076	192223	189849	189716	2576.08	17.5335	0.00195494	0.00242777	1.18528	0.245229	1.20259	0.266142	1.50101	0.585929		16	874	H80	L N K L L G G V T I A Q G	Unmod H2A variant
875	H81	161079	158516	135649	151748	14000.9	17.2113	0.00139734	0.00139031	193966	184879	164880	181242	14880.2	17.4676	0.00172328	0.00219621	1.19436	0.256237	1.23325	0.302468	1.57966	0.659614		16	875	H81	L N K L L G K V T I A Q G	Unmod H2A variant
876	H82	161821	162471	153110	159134	5227.05	17.2799	0.00160018	0.00159213	201380	176521	177057	184986	14200.1	17.4971	0.00182564	0.00229853	1.16245	0.217174	1.14089	0.190162	1.44368	0.529753		16	876	H82	L N K L L G R V T I A Q G	Unmod H2A variant
877	H83	123670	120737	124698	123035	2055.43	16.9087	0.000608799	0.000605734	144377	146468	159342	150062	8104.15	17.1952	0.000870905	0.00134425	1.21967	0.286493	1.43053	0.516551	2.2192	1.15004		16	877	H83	V T I A Q G G V L P N I Q	Unmod H2A variant
878	H84	134915	137641	137038	136531	1431.89	17.0589	0.000979448	0.000974518	160504	166546	169047	165366	4392.11	17.3353	0.00128926	0.00176241	1.21119	0.276428	1.31632	0.396506	1.80849	0.854787		16	878	H84	G V L P N I Q A V L L P K	Unmod H2A variant
879	H85	132034	128759	133244	131346	2320.38	17.003	0.000837034	0.000832821	158025	158494	152393	156304	3395.13	17.254	0.00104154	0.0015148	1.19002	0.250986	1.24432	0.315357	1.81888	0.863049		16	879	H85	I Q A V L L P K K T E S H	Unmod H2A variant
895	BLANK-16	128992	135742	141918	135551	6465.12	17.0485	0.000952516	0.000947721	152113	162534	162077	158908	5889.08	17.2778	0.00111272	0.00158595	1.17231	0.22936	1.1682	0.224282	1.67344	0.742816		16	895			BLANK-16
896	926	2643261	2400453	2535147	2526287	121646	21.2686	0.0666092	0.0662739	3456880	2018054	2408193	2627709	744107	21.3254	0.068604	0.0690452	1.04015	0.056787	1.02995	0.0425713	1.04182	0.0591009		16	896	926	10% Kac G Kac G Kac G Kac G Kac G Kac G Kac	POSCTRL-16
897	H129	115715	116296	117600	116537	965.333	16.8304	0.000430344	0.000428178	137153	134230	135309	135564	1478.09	17.0486	0.000474555	0.000948086	1.16327	0.218186	1.10273	0.141082	2.21423	1.14681		17	897	H129	T E N S T S A P A A K P K	Unmod H1 variant
898	H130	135633	130659	136034	134109	2994.22	17.033	0.000912914	0.000908319	158017	152117	153346	154493	3112.84	17.2372	0.000992038	0.00146532	1.152	0.204142	1.08667	0.119917	1.61323	0.689949		17	898	H130	A K P K R A K A S K K S T	Unmod H1 variant
899	H131	160017	148591	147124	151911	7058.51	17.2129	0.00140181	0.00139475	164444	160859	156888	160730	3779.64	17.2943	0.00116254	0.00163575	1.05806	0.081419	0.829316	-0.270006	1.17279	0.229941		17	899	H131	K K S T D H P K Y S D M I	Unmod H1 variant
900	H132	109300	107577	109748	108875	1146.2	16.7323	0.000219923	0.000218816	129347	128474	130293	129371	909.744	16.9812	0.000305261	0.000778873	1.18826	0.248845	1.38804	0.473045	3.55948	1.83167		17	900	H132	S D M I V A A I Q A E K N	Unmod H1 variant
901	H133	114202	110147	110938	111762	2149.51	16.7701	0.000299218	0.000297712	134685	131956	127313	131318	3727.18	17.0027	0.000358479	0.000832065	1.17498	0.232631	1.19805	0.260691	2.79487	1.48278		17	901	H133	A E K N R A G S S R Q S I	Unmod H1 variant
902	H134	150782	158152	156189	155041	3816.76	17.2423	0.00148778	0.00148029	168142	166404	171606	168717	2648.29	17.3642	0.00138089	0.00185399	1.08821	0.121958	0.928156	-0.107561	1.25245	0.324755		17	902	H134	R Q S I Q K I Y K S H Y K	Unmod H1 variant
903	H135	144720	141937	141331	142663	1807.28	17.1222	0.00114783	0.00114205	157843	158682	159343	158623	751.758	17.2752	0.00110492	0.00157816	1.11187	0.152991	0.962619	-0.0549637	1.38186	0.466609		17	903	H135	S H Y K V G E N A D S Q I	Unmod H1 variant
904	H136	123486	126797	131698	127327	4131.57	16.9582	0.00072667	0.000723012	151169	152156	152589	151971	727.789	17.2134	0.000923093	0.00139641	1.19355	0.255261	1.27031	0.345176	1.93138	0.949633		17	904	H136	D S Q I K L S I K R L V T	Unmod H1 variant
905	H137	150326	152208	146638	149724	2833.38	17.1919	0.00134176	0.001335	175410	180018	163996	173141	8248.41	17.4016	0.00150183	0.00197488	1.1564	0.209645	1.1193	0.162599	1.4793	0.564918		17	905	H137	R L V T T G V L K Q T K G	Unmod H1 variant
906	H138	151136	155536	160585	155752	4728.21	17.2489	0.00150731	0.00149973	175440	171370	167639	171483	3901.73	17.3877	0.0014565	0.00192956	1.101	0.138812	0.966286	-0.0494771	1.28661	0.363574		17	906	H138	Q T K G V G A S G S F R L	Unmod H1 variant
907	H139	157155	150421	150015	152530	4010.22	17.2187	0.00141883	0.00141169	172702	171907	171024	171878	839.384	17.391	0.00146729	0.00194035	1.12684	0.172286	1.03415	0.0484505	1.37449	0.458895		17	907	H139	S F R L A K S D E P K K S	Unmod H1 variant
908	H140	147975	144920	144050	145648	2061.37	17.1521	0.00122983	0.00122364	164276	166498	212850	181208	27425.3	17.4673	0.00172235	0.00219529	1.24415	0.315157	1.40049	0.485927	1.79407	0.843239		17	908	H140	P K K S V A F K K T K K E	Unmod H1 variant
909	H141	159288	162289	162425	161334	1773.19	17.2997	0.0016606	0.00165224	185949	186732	185402	186028	668.481	17.5052	0.00185411	0.00232699	1.15306	0.205467	1.11653	0.159023	1.40838	0.494039		17	909	H141	T K K E I K K V A T P K K	Unmod H1 variant
910	H142	156219	155301	153407	154976	1433.95	17.2417	0.00148598	0.0014785	174768	167836	174673	172426	3975.05	17.3956	0.00148227	0.00195532	1.1126	0.153933	0.997499	-0.00361318	1.3225	0.403267		17	910	H142	T P K K A S K P K K A A S	Unmod H1 variant
911	H143	155730	153486	158690	155969	2610.2	17.2509	0.00151325	0.00150564	173133	175233	171730	173365	1763.02	17.4035	0.00150795	0.001981	1.11154	0.152559	0.996498	-0.00506112	1.31572	0.395852		17	911	H143	K A A S K A P T K K P K A	Unmod H1 variant
912	H144	162796	161012	158657	160822	2076.05	17.2951	0.00164653	0.00163824	180392	183730	184305	182809	2112.84	17.48	0.00176612	0.00223904	1.13672	0.184875	1.07263	0.101155	1.36673	0.450731		17	912	H144	K P K A T P V K K A K K K	Unmod H1 variant
913	H145	129120	130912	131940	130657	1427.14	16.9954	0.00081813	0.000814012	150686	156145	157435	154755	3582.68	17.2396	0.000999201	0.00147248	1.18444	0.244201	1.22132	0.288444	1.80892	0.855129		17	913	H145	A K K K L A A T P K K A K	Unmod H1 variant
914	H146	162176	162027	157578	160594	2612.71	17.2931	0.00164027	0.00163201	192027	184062	181807	185965	5369.27	17.5047	0.00185241	0.00232529	1.15799	0.211619	1.12933	0.175469	1.4248	0.510756		17	914	H146	K K A K K P K T V K A K P	Unmod H1 variant
915	H147	133233	134580	132423	133412	1089.58	17.0255	0.000893782	0.000889283	143194	145307	147276	145259	2041.42	17.1483	0.000739593	0.001213	1.0888	0.122739	0.827488	-0.27319	1.36402	0.447864		17	915	H147	K A K P V K A S K P K K A	Unmod H1 variant
916	H148	144303	137125	131001	137476	6657.96	17.0688	0.0010054	0.00100034	151603	151493	158181	153759	3829.96	17.2303	0.000971963	0.00144526	1.11844	0.161488	0.966743	-0.048796	1.44477	0.530838		17	916	H148	P K K A P V K P K A K S S	Unmod H1 variant
917	H149	136133	132294	137077	135168	2533.32	17.0444	0.000942006	0.000937265	153748	152604	161429	155927	4799.08	17.2505	0.00103123	0.0015045	1.15358	0.206117	1.09472	0.130559	1.6052	0.682754		17	917	H149	K A K S S A K R A G K K K	Unmod H1 variant
918	H150	113695	113199	111971	112955	887.522	16.7854	0.000331972	0.000330301	142422	141799	133203	139141	5152.17	17.0862	0.00057235	0.00104584	1.23183	0.300803	1.72409	0.785837	3.16631	1.6628		17	918	H150	S E T V P P A P A A S A A	Unmod H1 variant
919	H151	112549	107034	109220	109601	2777.17	16.7419	0.000239861	0.000238654	123938	124684	124924	124515	514.184	16.926	0.00017251	0.000646184	1.13608	0.184062	0.719206	-0.475523	2.70762	1.43702		17	919	H151	A S A A P E K P L A G K K	Unmod H1 variant
920	H152	141698	137992	138633	139441	1980.72	17.0893	0.00105936	0.00105402	146891	144888	145233	145671	1070.83	17.1524	0.000750847	0.00122425	1.04468	0.0630556	0.708777	-0.496596	1.1615	0.215988		17	920	H152	A G K K A K K P A K A A A	Unmod H1 variant
921	H153	154700	149499	146435	150211	4178.29	17.1966	0.00135514	0.00134832	175471	194646	181116	183744	9854	17.4873	0.00179169	0.0022646	1.22324	0.290706	1.32214	0.40288	1.67957	0.748093		17	921	H153	K A A A A S K K K P A G P	Unmod H1 variant
922	H154	114347	111258	111603	112403	1692.65	16.7783	0.000316803	0.000315209	138085	142907	144736	141909	3435.91	17.1146	0.000648021	0.00112147	1.26251	0.336293	2.0455	1.03245	3.55786	1.83101		17	922	H154	P A G P S V S E L I V Q A	Unmod H1 variant
923	H155	136332	141522	139126	138993	2597.54	17.0847	0.00104706	0.00104179	155479	158843	159985	158102	2342.53	17.2705	0.0010907	0.00156394	1.13748	0.185843	1.04168	0.0589082	1.5012	0.586118		17	923	H155	I V Q A A S S S K E R G G	Unmod H1 variant
924	H156	154709	149822	148775	151102	3167.32	17.2052	0.0013796	0.00137266	166961	165322	169344	167209	2022.44	17.3513	0.00133965	0.00181278	1.1066	0.14613	0.971045	-0.0423897	1.32063	0.40123		17	924	H156	E R G G V S L A A L K K A	Unmod H1 variant
925	H157	142280	141872	135746	139966	3660.32	17.0947	0.00107377	0.00106837	164843	163989	174051	167628	5579.13	17.3549	0.0013511	0.00182422	1.19763	0.260184	1.25827	0.331445	1.70748	0.771867		17	925	H157	L K K A L A A A G Y D V E	Unmod H1 variant
926	H158	146833	150723	154121	150559	3646.77	17.2	0.00136469	0.00135782	176283	179986	189423	181897	6775.31	17.4728	0.0017412	0.00221413	1.20815	0.272795	1.2759	0.35151	1.63065	0.705448		17	926	H158	Y D V E K N N S R I K L G	Unmod H1 variant
927	H159	219766	204754	201361	208627	9794.7	17.6706	0.00295941	0.00294451	263952	222266	212318	232845	27394.5	17.829	0.003134	0.00360627	1.11608	0.158446	1.059	0.0826966	1.22474	0.292479		17	927	H159	I K L G I K S L V S K G T	Unmod H1 variant
928	H160	142906	140228	142037	141724	1366.22	17.1127	0.00112204	0.0011164	154039	156982	157431	156151	1842.49	17.2526	0.00103735	0.00151061	1.1018	0.139858	0.924514	-0.113233	1.35311	0.436282		17	928	H160	S K G T L V Q T K G T G A	Unmod H1 variant
929	H161	118656	116150	116690	117165	1318.89	16.8382	0.0004476	0.000445347	147111	165605	158374	157030	9319.97	17.2607	0.00106138	0.00153464	1.34024	0.422494	2.37128	1.24567	3.44594	1.7849		17	929	H161	G T G A S G S F K L N K K	Unmod H1 variant
930	H162	111132	110579	111891	111201	658.69	16.7628	0.000283793	0.000282364	153484	152140	150337	151987	1579.07	17.2136	0.000923521	0.00139684	1.36678	0.450782	3.25421	1.70231	4.94694	2.30654		17	930	H162	L N K K A S S V E T K P G	Unmod H1 variant
931	H163	126803	133548	126995	129115	3840	16.9783	0.000775782	0.000771878	173716	186311	150238	170088	18308.1	17.3759	0.00141837	0.00189145	1.31734	0.397624	1.82831	0.870509	2.45046	1.29305		17	931	H163	T K P G A S K V A T K T K	Unmod H1 variant
932	H164	160440	155577	147041	154353	6782.89	17.2359	0.00146887	0.00146148	176768	178240	227908	194305	29110.1	17.568	0.00208041	0.00255318	1.25884	0.332095	1.41633	0.502154	1.74698	0.804862		17	932	H164	T K T K A T G A S K K L K	Unmod H1 variant
933	H165	388938	181104	177655	249232	121001	17.9271	0.00407455	0.00405404	211482	217495	222284	217087	5412.55	17.7279	0.0027032	0.00317568	0.871023	-0.199218	0.663436	-0.591971	0.783337	-0.352296		17	933	H165	K K L K K A T G A S K K S	Unmod H1 variant
934	H166	160639	162240	153566	158815	4615.71	17.277	0.00159142	0.00158341	207143	209605	199504	205417	5266.97	17.6482	0.00238418	0.00285681	1.29344	0.371211	1.49814	0.583177	1.80421	0.851367		17	934	H166	S K K S V K T P K K A K K	Unmod H1 variant
935	H167	162428	436429	157462	252106	159647	17.9437	0.00415348	0.00413257	195484	193744	205851	198360	6545.76	17.5978	0.00219124	0.00266396	0.78681	-0.345914	0.527568	-0.922571	0.644625	-0.633468		17	935	H167	K A K K P A A T R K S S K	Unmod H1 variant
936	H168	136133	130612	133367	133371	2760.5	17.0251	0.000892646	0.000888153	161802	161262	166663	163242	2974.66	17.3167	0.00123122	0.00170439	1.22397	0.291574	1.37929	0.463923	1.91902	0.940373		17	936	H168	K S S K N P K K P K T V K	Unmod H1 variant
937	H169	141645	137855	140804	140101	1990.31	17.0961	0.00107749	0.00107207	183345	184086	181710	183047	1215.71	17.4819	0.00177263	0.00224554	1.30653	0.385743	1.64515	0.718216	2.09459	1.06667		17	937	H169	K T V K P K K V A K S P A	Unmod H1 variant
938	H170	138290	126267	124918	129825	7361.87	16.9862	0.000795272	0.000791269	165435	168572	164031	166013	2324.96	17.3409	0.00130695	0.00178009	1.27874	0.354725	1.6434	0.716684	2.24966	1.16971		17	938	H170	K S P A K A K A V K P K A	Unmod H1 variant
939	H171	149792	148602	153410	150601	2504.09	17.2004	0.00136585	0.00135898	185976	190969	192048	189664	3239.43	17.5331	0.00195353	0.00242636	1.25938	0.332714	1.43027	0.516284	1.78543	0.836274		17	939	H171	K P K A A K A R V T K P K	Unmod H1 variant
940	H172	159658	147917	148553	152043	6602.73	17.2141	0.00140543	0.00139836	188839	183421	191767	188009	4234.45	17.5204	0.00190828	0.00238113	1.23655	0.306325	1.35779	0.441255	1.7028	0.76791		17	940	H172	T K P K T A K P K K A A P	Unmod H1 variant
941	H173	161726	152863	159603	158064	4627.59	17.2701	0.0015708	0.00156289	203337	204861	212910	207036	5143.79	17.6595	0.00242843	0.00290104	1.30982	0.389373	1.54599	0.628527	1.8562	0.892351		17	941	H173	K T A K P K K A A P K K K	Unmod H1 variant
942	H174	113657	114081	110539	112759	1934.23	16.7829	0.000326589	0.000324945	157892	156909	155818	156873	1037.47	17.2592	0.00105709	0.00153035	1.39122	0.476354	3.23676	1.69455	4.70955	2.23559		17	942	H174	S E T A P A A P A A P A P	Unmod H1 variant
943	H175	125897	130737	130923	129186	2849.59	16.9791	0.000777714	0.000773799	167066	161238	160152	162819	3718.16	17.3129	0.00121963	0.00169281	1.26035	0.33382	1.56823	0.649136	2.18766	1.12939		17	943	H175	A P A P A E K T P V K K K	Unmod H1 variant
944	H176	166259	167005	155554	162939	6406.75	17.314	0.00170469	0.00169611	197882	198310	197595	197929	359.81	17.5946	0.00217947	0.00265219	1.21474	0.280648	1.27851	0.354467	1.56369	0.644956		17	944	H176	V K K K A R K S A G A A K	Unmod H1 variant
945	H177	165518	168636	166899	167018	1562.38	17.3496	0.00181669	0.00180755	206493	209973	210080	208849	2040.77	17.6721	0.00247799	0.00295057	1.25046	0.322457	1.36401	0.447854	1.63236	0.706959		17	945	H177	G A A K R K A S G P P V S	Unmod H1 variant
946	H178	122959	122828	121057	122281	1062.32	16.8998	0.000588101	0.000585141	164907	164273	158736	162639	3394.64	17.3113	0.00121471	0.00168789	1.33004	0.411466	2.06548	1.04648	2.88459	1.52837		17	946	H178	P P V S E L I T K A V A A	Unmod H1 variant
947	H179	144596	154915	155743	151751	6210.51	17.2113	0.00139743	0.0013904	183627	179681	171877	178395	5979.63	17.4447	0.00164545	0.00211843	1.17557	0.233366	1.17748	0.235706	1.52361	0.607496		17	947	H179	A V A A S K E R S G V S L	Unmod H1 variant
948	H180	177154	187215	178831	181067	5390.23	17.4662	0.00220252	0.00219143	197199	194295	196729	196074	1558.76	17.581	0.00212877	0.00260151	1.08288	0.11488	0.966514	-0.0491373	1.18713	0.247476		17	948	H180	G V S L A A L K K A L A A
949	H181	163028	158727	161038	160931	2152.5	17.2961	0.00164953	0.00164123	193938	206559	210211	203569	8538.51	17.6352	0.00233366	0.00280631	1.26495	0.339078	1.41474	0.500537	1.70988	0.773896		17	949	H181	A L A A A G Y D V E K N N
950	H182	177204	177463	321445	225371	83202.9	17.7819	0.00341924	0.00340203	230050	210713	215984	218916	9996.29	17.74	0.00275319	0.00322565	0.971358	-0.0419245	0.805207	-0.312568	0.948154	-0.0768065		17	950	H182	E K N N S R I K L G L K S	Unmod H1 variant
951	BLANK-17	131574	123864	121681	125706	5197.45	16.9397	0.000682161	0.000678728	148335	140405	139101	142614	4997.53	17.1218	0.000667276	0.00114072	1.1345	0.182055	0.978179	-0.0318293	1.68067	0.749035		17	951			BLANK-17
952	481	349909	282329	335199	322479	35540.3	18.2988	0.00608612	0.00605548	306727	307462	313093	309094	3482.68	18.2377	0.00521846	0.00568974	0.958493	-0.0611596	0.857436	-0.221898	0.939602	-0.0898789		17	952	481	5% S G Rme G K G G K G L G K G	NEGCTRL-17
953	H183	142661	146695	145297	144884	2048.42	17.1445	0.00120885	0.00120276	170231	174453	184831	176505	7513.19	17.4293	0.00159379	0.00206679	1.21825	0.284807	1.31844	0.398828	1.71837	0.781039		18	953	H183	G L K S L V S K G T L V Q	Unmod H1 variant
954	H184	135248	133955	136518	135240	1281.52	17.0452	0.000943993	0.000939241	178147	181649	182545	180780	2324.12	17.4639	0.00171066	0.00218361	1.33673	0.418712	1.81216	0.857708	2.32486	1.21715		18	954	H184	T L V Q T K G T G A S G S	Unmod H1 variant
955	H185	118518	117626	126081	120742	4645.46	16.8816	0.000545817	0.00054307	167212	168534	168114	167953	675.486	17.3577	0.00136	0.00183311	1.39101	0.476137	2.49168	1.31712	3.37547	1.75509		18	955	H185	A S G S F K L N K K A A S	Unmod H1 variant
956	H186	130325	129010	124653	127996	2968.85	16.9657	0.000745042	0.000741292	257593	163862	151811	191089	57908.8	17.5439	0.00199247	0.00246528	1.49293	0.578143	2.6743	1.41916	3.32565	1.73364		18	956	H186	K A A S G E A K P K A K K	Unmod H1 variant
957	H187	154244	139511	143132	145629	7677.34	17.1519	0.0012293	0.00122311	157281	175516	191248	174682	16998.9	17.4144	0.00154394	0.00201696	1.1995	0.262431	1.25595	0.328784	1.64905	0.721633		18	957	H187	K A K K A G A A K A K K P	Unmod H1 variant
958	H188	137858	136001	136549	136803	954.134	17.0617	0.000986899	0.000981932	177979	176235	174133	176116	1925.77	17.4262	0.00158314	0.00205615	1.28737	0.364427	1.60416	0.681816	2.09398	1.06625		18	958	H188	A K K P A G A A K K P K K	Unmod H1 variant
959	H189	163333	155492	164501	161109	4899.11	17.2977	0.00165441	0.00164609	197759	212992	201213	203988	7986.65	17.6381	0.00234511	0.00281775	1.26615	0.34045	1.41749	0.503334	1.71179	0.775505		18	959	H189	K P K K A T G A A T P K K	Unmod H1 variant
960	H190	148833	151965	141285	147361	5490.05	17.169	0.00127686	0.00127044	184920	184276	170084	179760	8385.85	17.4557	0.00168277	0.00215573	1.21986	0.286717	1.31789	0.398235	1.69684	0.762853		18	960	H190	T P K K S A K K T P K K A	Unmod H1 variant
961	H191	105381	119130	115706	113406	7157.33	16.7911	0.000344349	0.000342615	146200	137005	148895	144033	6234.09	17.136	0.000706086	0.00117951	1.27007	0.34491	2.0505	1.03597	3.44266	1.78352		18	961	H191	P K K A K K P A A A A G A	Unmod H1 variant
962	H192	147247	156972	140136	148118	8451.75	17.1764	0.00129766	0.00129113	187190	185590	189807	187529	2128.84	17.5168	0.00189516	0.00236801	1.26608	0.340363	1.46044	0.546404	1.83406	0.875044		18	962	H192	A A G A K K A K S P K K A	Unmod H1 variant
963	H193	116925	119710	120752	119129	1978.55	16.8622	0.000501528	0.000499004	159108	170793	170373	166758	6628.42	17.3474	0.00132733	0.00180045	1.39981	0.485231	2.64656	1.40412	3.60809	1.85124		18	963	H193	P K K A K A A K P K K A P	Unmod H1 variant
964	H194	132307	132757	133259	132774	476.237	17.0186	0.000876269	0.000871859	165659	228538	158261	184153	38616.4	17.4905	0.00180286	0.00227576	1.38696	0.471926	2.05742	1.04084	2.61024	1.38418		18	964	H194	K K A P K S P A K A K A V	Unmod H1 variant
965	H195	134961	131047	134723	133577	2194.27	17.0273	0.000898313	0.000893791	158148	150540	145131	151273	6539.38	17.2068	0.000904002	0.00137733	1.13248	0.179483	1.00633	0.00910769	1.541	0.623864		18	965	H195	A K A V K P K A A K P K T	Unmod H1 variant
966	H196	117264	116564	114085	115971	1670.4	16.8234	0.0004148	0.000412712	160633	160309	161759	160900	761.069	17.2958	0.00116719	0.00164039	1.38742	0.472403	2.81386	1.49255	3.97466	1.99083		18	966	H196	K P K T A K P K A A K P K	Unmod H1 variant
967	H197	126237	123688	125231	125052	1283.89	16.9322	0.000664191	0.000660848	165254	169962	172818	169345	3819.6	17.3696	0.00139804	0.00187113	1.35419	0.437434	2.10487	1.07373	2.83141	1.50152		18	967	H197	K A A K P K K A A A K K K	Unmod H1 variant
968	H198	115418	116849	121112	117793	2962.05	16.8459	0.000464838	0.000462498	159034	156167	153197	156133	2918.65	17.2524	0.00103685	0.00151012	1.32548	0.406519	2.23057	1.15741	3.26513	1.70714		18	968	H198	A R P P T L S P I P H A G	variant controls
969	H199	127215	123530	124486	125077	1912.27	16.9325	0.000664878	0.000661531	153284	149917	147600	150267	2858.12	17.1972	0.0008765	0.00134984	1.2014	0.264712	1.31829	0.398665	2.04048	1.02891		18	969	H199	V Q R E T G K L D G P D K	variant controls
970	H200	146874	136664	135057	139532	6409.21	17.0902	0.00106185	0.0010565	160342	167623	166471	164812	3913.75	17.3305	0.00127413	0.00174728	1.18118	0.240229	1.19992	0.262935	1.65384	0.725816		18	970	H200	H H H H H H G K G L G K G	variant controls
1007	BLANK-18	127596	132631	132183	130803	2786.65	16.997	0.00082214	0.000818002	153687	239378	149722	180929	50657.1	17.4651	0.00171473	0.00218767	1.38321	0.468024	2.08569	1.06052	2.67441	1.41922		18	1007			BLANK-18
1008	540	195837	185005	171899	184247	11987	17.4913	0.00228986	0.00227833	203356	187429	190212	193666	8506.66	17.5632	0.00206292	0.0025357	1.05112	0.0719271	0.900893	-0.150573	1.11296	0.154403		18	1008	540	10% K R H Rcit Kme V L R D N I Q G	NEGCTRL-18

## Sheet: 10_116973_HATS
FOR SORTING	peptide#	635-spot1	635-spot2	635-spot3	635-Avg Total Signal Array1 well1	635-Std Array 1 well1	635-Log2 Array1 well1	635-Norm Array 1 well1 (w/in well)	635-Norm Array 1 well1 (w/in array)	635-spot1	635-spot2	635-spot3	635-Avg Total Signal Array1 well2	635-Std Array 1 well2	635-Log2 Array 1 well2	635-Norm Array 1 well2 (w/in well)	635-Norm Array 1 well2 (w/in array)	W2/W1	Log2 (W2/W1)	Norm w/in well W2/W1	Log2(Norm w/in well W2/W1)	Norm w/in array W2/W1	Log2(Norm w/in array W2/W1)		Block	Numbering	#	Sequence		Mod1	Mod2	Mod3	Mod4	Mod5
1	1	91664	90425	93675	91921.3	1640.21	16.4881	0.000923951	0.00108398	84039	85212	85714	84988.3	859.608	16.375	0.000764994	0.000764994	0.924577	-0.113135	0.82796	-0.272368	0.70573	-0.502812		1	1	1	A R T K Q T A R K S T G G	H3 1-13
2	2	111675	107377	97777	105610	7115.56	16.6884	0.00157955	0.00171376	116837	110927	124158	117307	6628.03	16.8399	0.00225196	0.00225196	1.11076	0.151551	1.4257	0.511672	1.31405	0.394015		1	2	2	A Rme T K Q T A R K S T G G	H3 1-13	H3R2me1
3	3	101958	101401	105199	102853	2050.98	16.6502	0.0014475	0.00158692	112056	103799	114474	110110	5597.33	16.7486	0.00192081	0.00192081	1.07056	0.0983619	1.32698	0.408145	1.2104	0.275485		1	3	3	A Rme2s T K Q T A R K S T G G	H3 1-13	H3R2me2s
4	4	106593	108736	102585	105971	3122.27	16.6933	0.00159687	0.0017304	113823	114303	128174	118767	8150.52	16.8578	0.00231911	0.00231911	1.12074	0.164456	1.45228	0.538322	1.34021	0.42246		1	4	4	A Rme2a T K Q T A R K S T G G	H3 1-13	H3R2me2a
5	5	109920	89868	90744	96844	11332.6	16.5634	0.00115972	0.00131046	112849	78021	78858	89909.3	19870.7	16.4562	0.000991406	0.000991406	0.928393	-0.107192	0.854866	-0.22623	0.75653	-0.40253		1	5	5	A Rcit T K Q T A R K S T G G	H3 1-13	H3R2cit
6	6	139877	145023	153667	146189	6968.55	17.1575	0.00352308	0.00358079	134510	136160	143955	138208	5044.68	17.0765	0.0032136	0.0032136	0.945409	-0.0809902	0.912157	-0.132646	0.897457	-0.156085		1	6	6	A R Tph K Q T A R K S T G G	H3 1-13	H3T3ph
7	7	88365	85890	92091	88782	3121.46	16.438	0.000773594	0.000939538	82311	87956	91492	87253	4630.7	16.4129	0.00086919	0.00086919	0.982778	-0.0250625	1.12357	0.168095	0.925125	-0.11228		1	7	7	A R T Kme Q T A R K S T G G	H3 1-13	H3K4me1
8	8	85399	98760	95660	93273	6993.03	16.5092	0.000988689	0.00114617	95004	94365	96772	95380.3	1246.85	16.5414	0.00124312	0.00124312	1.02259	0.0322323	1.25734	0.330379	1.08459	0.117153		1	8	8	A R T Kme2 Q T A R K S T G G	H3 1-13	H3K4me2
9	9	99241	100487	84025	94584.3	9165.85	16.5293	0.00105149	0.0012065	104306	106840	74450	95198.7	18013.5	16.5387	0.00123476	0.00123476	1.0065	0.00934013	1.17429	0.231793	1.02343	0.0334086		1	9	9	A R T Kme3 Q T A R K S T G G	H3 1-13	H3K4me3
10	10	198955	183774	197039	193256	8267.35	17.5602	0.00577734	0.0057463	181322	175942	198365	185210	11706.1	17.4988	0.00537609	0.00537609	0.958364	-0.0613538	0.930549	-0.103846	0.935575	-0.0960747		1	10	10	A R T Kac Q T A R K S T G G	H3 1-13	H3K4ac
11	11	95507	95626	97999	96377.3	1405.66	16.5564	0.00113737	0.00128899	179549	91890	98973	123471	48694.2	16.9138	0.00253553	0.00253553	1.28112	0.357403	2.2293	1.15659	1.96707	0.976046		1	11	11	A R T K Q Tph A R K S T G G	H3 1-13	H3T6ph
12	12	85225	92898	94766	90963	5056.27	16.473	0.000878052	0.00103988	86534	92686	93212	90810.7	3713.03	16.4706	0.00103288	0.00103288	0.998325	-0.00241807	1.17633	0.234287	0.99326	-0.00975656		1	12	12	A R T K Q T A Rme K S T G G	H3 1-13	H3R8me1
13	13	99205	100829	100755	100263	917.002	16.6134	0.00132347	0.00146777	102646	105855	108797	105766	3076.47	16.6905	0.00172096	0.00172096	1.05489	0.0770866	1.30034	0.378883	1.1725	0.229586		1	13	13	A R T K Q T A Rme2a K S T G G	H3 1-13	H3R8me2a
14	14	86610	82165	82961	83912	2370.19	16.3566	0.000540347	0.000715473	77603	78430	78553	78195.3	516.649	16.2548	0.000452454	0.000452454	0.931873	-0.101795	0.83734	-0.256115	0.632384	-0.661126		1	14	14	A R T K Q T A Rme2s K S T G G	H3 1-13	H3R8me2s
15	15	85672	90215	92152	89346.3	3326.19	16.4471	0.000800623	0.000965502	82479	82617	88793	84629.7	3606.21	16.3689	0.000748492	0.000748492	0.947209	-0.078245	0.934888	-0.0971346	0.775236	-0.367292		1	15	15	A R T K Q T A Rcit K S T G G	H3 1-13	H3R8cit
16	16	94871	177705	96118	122898	47468.3	16.9071	0.00240757	0.00250919	107713	152547	113000	124420	24501.7	16.9249	0.00257921	0.00257921	1.01238	0.017757	1.07129	0.0993545	1.02791	0.0397109		1	16	16	A R T K Q T A R Kme S T G G	H3 1-13	H3K9me1
17	17	88351	90649	94250	91083.3	2973.39	16.4749	0.000883816	0.00104542	93060	94174	98120	95118	2658.81	16.5374	0.00123105	0.00123105	1.0443	0.0625313	1.39288	0.478074	1.17757	0.235809		1	17	17	A R T K Q T A R Kme2 S T G G	H3 1-13	H3K9me2
18	18	103732	83759	83400	90297	11636.4	16.4624	0.000846154	0.00100924	100609	80064	76644	85772.3	12962.2	16.3882	0.000801066	0.000801066	0.949891	-0.0741657	0.946713	-0.0790007	0.79373	-0.333279		1	18	18	A R T K Q T A R Kme3 S T G G	H3 1-13	H3K9me3
19	19	179769	127707	128617	145364	29798.8	17.1493	0.00348358	0.00354284	306781	101513	121383	176559	113212	17.4298	0.00497808	0.00497808	1.2146	0.280477	1.42901	0.515018	1.40511	0.490683		1	19	19	A R T K Q T A R Kac S T G G	H3 1-13	H3K9ac
20	20	110256	191893	105252	135800	48642.1	17.0511	0.00302552	0.00310281	102259	97420	108217	102632	5408.16	16.6471	0.00157676	0.00157676	0.755757	-0.404006	0.521155	-0.940216	0.508173	-0.976609		1	20	20	A R T K Q T A R K Sph T G G	H3 1-13	H3S10ph
21	21	121033	143598	107799	124143	18101	16.9216	0.00246721	0.00256648	98613	104710	102887	102070	3129.53	16.6392	0.00155091	0.00155091	0.822195	-0.282448	0.628607	-0.669769	0.604293	-0.72668		1	21	21	A Rme T Kme Q T A R K S T G G	H3 1-13	H3R2me1	H3K4me1
22	22	103491	104512	84477	97493.3	11284	16.573	0.00119082	0.00134034	102837	102932	78841	94870	13881.6	16.5337	0.00121964	0.00121964	0.973092	-0.0393516	1.0242	0.0345017	0.90995	-0.136141		1	22	22	A Rme T Kme2 Q T A R K S T G G	H3 1-13	H3R2me1	H3K4me2
23	23	80024	80362	80823	80403	401.075	16.295	0.000372285	0.000554027	77520	75547	76037	76368	1027.3	16.2207	0.00036838	0.00036838	0.949815	-0.0742811	0.989511	-0.0152124	0.664913	-0.588761		1	23	23	A Rme T Kme3 Q T A R K S T G G	H3 1-13	H3R2me1	H3K4me3
24	24	209025	175280	230467	204924	27821.1	17.6447	0.00633617	0.00628313	217375	218155	244712	226747	15562.7	17.7907	0.00728721	0.00728721	1.10649	0.145997	1.1501	0.201755	1.1598	0.213882		1	24	24	A Rme T Kac Q T A R K S T G G	H3 1-13	H3R2me1	H3K4ac
25	25	143008	234745	94250	157334	71334.7	17.2635	0.00405688	0.00409357	90890	93256	93417	92521	1414.78	16.4975	0.00111157	0.00111157	0.588053	-0.765981	0.273995	-1.86778	0.271539	-1.88077		1	25	25	A Rme2a T Kme Q T A R K S T G G	H3 1-13	H3R2me2a	H3K4me1
26	26	90411	88790	91474	90225	1351.63	16.4612	0.000842706	0.00100593	92155	90770	97964	93629.7	3816.99	16.5147	0.00116257	0.00116257	1.03774	0.0534385	1.37957	0.464222	1.15572	0.208795		1	26	26	A Rme2a T Kme2 Q T A R K S T G G	H3 1-13	H3R2me2a	H3K4me2
27	27	95014	83917	82477	87136	6860.43	16.411	0.00069476	0.000863807	76558	75998	75282	75946	639.587	16.2127	0.000348964	0.000348964	0.87158	-0.198295	0.502281	-0.993435	0.403984	-1.30763		1	27	27	A Rme2a T Kme3 Q T A R K S T G G	H3 1-13	H3R2me2a	H3K4me3
28	28	154267	133091	139504	142287	10858.9	17.1184	0.00333621	0.00340127	136113	147531	181940	155195	23855.3	17.2437	0.00399513	0.00399513	1.09071	0.125272	1.1975	0.260031	1.1746	0.232167		1	28	28	A Rme2a T Kac Q T A R K S T G G	H3 1-13	H3R2me2a	H3K4ac
29	29	90533	95345	139417	108432	26941.7	16.7264	0.00171471	0.0018436	87120	87887	89887	88298	1428.55	16.4301	0.000917269	0.000917269	0.814319	-0.296333	0.534942	-0.902545	0.497542	-1.00711		1	29	29	A Rme2s T Kme Q T A R K S T G G	H3 1-13	H3R2me2s	H3K4me1
30	30	241374	91782	91785	141647	86366.1	17.1119	0.00330554	0.00337181	92292	89685	91408	91128.3	1325.81	16.4756	0.00104749	0.00104749	0.643348	-0.636328	0.316889	-1.65795	0.310661	-1.68659		1	30	30	A Rme2s T Kme2 Q T A R K S T G	H3 1-13	H3R2me2s	H3K4me2
31	31	99788	84513	86386	90229	8331.14	16.4613	0.000842898	0.00100611	99905	77631	80316	85950.7	12159.1	16.3912	0.000809271	0.000809271	0.952584	-0.0700824	0.960105	-0.0587353	0.804353	-0.314098		1	31	31	A Rme2s T Kme3 Q T A R K S T G G	H3 1-13	H3R2me2s	H3K4me3
32	32	278691	316442	262234	285789	27792.3	18.1246	0.0102092	0.0100037	277545	349253	399375	342058	61232.9	18.3839	0.0125925	0.0125925	1.19689	0.259289	1.23345	0.302703	1.25879	0.332041		1	32	32	A Rme2s T Kac Q T A R K S T G G	H3 1-13	H3R2me2s	H3K4ac
33	33	83614	80402	86006	83340.7	2811.98	16.3467	0.000512983	0.000689187	83538	80391	80373	81434	1822.14	16.3133	0.000601462	0.000601462	0.977122	-0.0333894	1.17248	0.229563	0.872714	-0.19642		1	33	33	A Rcit T Kme Q T A R K S T G G	H3 1-13	H3R2cit	H3K4me1
34	34	93909	118943	87510	100121	16611.7	16.6114	0.00131666	0.00146122	84283	84723	86949	85318.3	1429.23	16.3806	0.000780177	0.000780177	0.852155	-0.230812	0.592545	-0.755004	0.533922	-0.9053		1	34	34	A Rcit T Kme2 Q T A R K S T G G	H3 1-13	H3R2cit	H3K4me2
35	35	98407	94123	80992	91174	9074.3	16.4763	0.000888158	0.00104959	95774	97330	75551	89551.7	12149.9	16.4504	0.00097495	0.00097495	0.982206	-0.0259022	1.09772	0.134511	0.928885	-0.106429		1	35	35	A Rcit T Kme3 Q T A R K S T G G	H3 1-13	H3R2cit	H3K4me3
36	36	101166	101805	102811	101927	829.295	16.6372	0.00140318	0.00154434	103017	100382	106459	103286	3047.42	16.6563	0.00160685	0.00160685	1.01333	0.0191037	1.14515	0.195534	1.04048	0.0572457		1	36	36	A Rcit T Kac Q T A R K S T G G	H3 1-13	H3R2cit	H3K4ac
37	37	82937	83015	79466	81806	2026.87	16.3199	0.000439481	0.000618578	83560	77758	80666	80661.3	2901	16.2996	0.000565913	0.000565913	0.986008	-0.0203294	1.28768	0.364778	0.914861	-0.128376		1	37	37	A Rme Tph K Q T A R K S T G G	H3 1-13	H3R2me1	H3T3ph
38	38	87321	101267	95442	94676.7	7004.43	16.5307	0.00105592	0.00121075	85067	85108	89316	86497	2441.41	16.4004	0.000834407	0.000834407	0.913604	-0.130359	0.79022	-0.339673	0.689167	-0.537074		1	38	38	A Rme2s Tph K Q T A R K S T G G	H3 1-13	H3R2me2s	H3T3ph
39	39	89810	94137	99780	94575.7	4999.45	16.5292	0.00105108	0.0012061	93151	95146	124378	104225	17481.5	16.6693	0.00165006	0.00165006	1.10203	0.14016	1.56987	0.650644	1.36809	0.452167		1	39	39	A Rme2a Tph K Q T A R K S T G G	H3 1-13	H3R2me2a	H3T3ph
40	40	74549	73608	77774	75310.3	2184.86	16.2006	0.000128374	0.000319718	68265	68394	68425	68361.3	84.8548	16.0609	0	0	0.907728	-0.139667	0	#NUM!	0	#NUM!		1	40	40	A Rcit Tph K Q T A R K S T G G	H3 1-13	H3R2cit	H3T3ph
41	41	80346	77789	77839	78658	1462.06	16.2633	0.000288709	0.000473741	70281	72005	75122	72469.3	2453.68	16.1451	0.000189006	0.000189006	0.921322	-0.118223	0.654658	-0.611186	0.398964	-1.32567		1	41	41	A Rme T K Q Tph A R K S T G G	H3 1-13	H3R2me1	H3T6ph
42	42	77323	73925	81707	77651.7	3901.4	16.2447	0.000240511	0.00042744	74798	75836	85266	78633.3	5767.46	16.2629	0.000472606	0.000472606	1.01264	0.0181241	1.96501	0.974536	1.10567	0.144915		1	42	42	A Rme2s T K Q Tph A R K S T G G	H3 1-13	H3R2me2s	H3T6ph
43	43	92509	91720	93642	92623.7	966.117	16.4991	0.000957589	0.00111629	103607	123862	109814	112428	10377.4	16.7786	0.00202746	0.00202746	1.21381	0.279544	2.11725	1.08219	1.81624	0.860959		1	43	43	A Rme2a T K Q Tph A R K S T G G	H3 1-13	H3R2me2a	H3T6ph
44	44	98048	78820	79260	85376	10976.5	16.3815	0.000610465	0.000782831	107716	74787	77296	86599.7	18330.3	16.4021	0.000839131	0.000839131	1.01433	0.0205309	1.37458	0.458987	1.07192	0.100195		1	44	44	A Rcit T K Q Tph A R K S T G G	H3 1-13	H3R2cit	H3T6ph
45	45	79176	80394	76690	78753.3	1887.83	16.2651	0.000293275	0.000478127	74725	74162	75137	74674.7	489.445	16.1883	0.000290471	0.000290471	0.94821	-0.0767221	0.99044	-0.0138579	0.607519	-0.719		1	45	45	A R Tph Kme Q T A R K S T G G	H3 1-13	H3T3ph	H3K4me1
46	46	82337	79722	81756	81271.7	1373.13	16.3105	0.000413889	0.000593994	73901	80682	77809	77464	3403.64	16.2412	0.000418806	0.000418806	0.953149	-0.0692265	1.01188	0.017037	0.705068	-0.504165		1	46	46	A R Tph Kme2 Q T A R K S T G G	H3 1-13	H3T3ph	H3K4me2
47	47	85019	82863	83531	83804.3	1103.68	16.3547	0.000535191	0.00071052	90171	86148	91268	89195.7	2695.75	16.4447	0.00095857	0.00095857	1.06433	0.0899488	1.79108	0.840832	1.34911	0.43201		1	47	47	A R Tph Kme3 Q T A R K S T G G	H3 1-13	H3T3ph	H3K4me3
48	48	855179	968845	457816	760613	268318	19.5368	0.0329507	0.0318499	904356	826404	340146	690302	305739	19.3969	0.028615	0.028615	0.90756	-0.139936	0.868417	-0.203539	0.898431	-0.15452		1	48	48	A R Tph Kac Q T A R K S T G G	H3 1-13	H3T3ph	H3K4ac
49	49	99869	91502	84009	91793.3	7934.01	16.4861	0.000917821	0.00107809	84027	82478	87117	84540.7	2361.77	16.3674	0.000744398	0.000744398	0.920989	-0.118744	0.811049	-0.302139	0.69048	-0.534328		1	49	49	A R T Kme Q Tph A R K S T G G	H3 1-13	H3K4me1	H3T6ph
50	50	82956	90535	83887	85792.7	4133.28	16.3886	0.000630421	0.000802001	82097	89831	85341	85756.3	3883.69	16.388	0.000800329	0.000800329	0.999576	-0.000611113	1.26952	0.344278	0.997916	-0.00301025		1	50	50	A R T Kme2 Q Tph A R K S T G G	H3 1-13	H3K4me2	H3T6ph
51	51	87225	98825	90825	92291.7	5937.45	16.4939	0.000941688	0.00110101	95515	104374	104149	101346	5051.05	16.6289	0.0015176	0.0015176	1.09811	0.135017	1.61157	0.688467	1.37836	0.462955		1	51	51	A R T Kme3 Q Tph A R K S T G G	H3 1-13	H3K4me3	H3T6ph
52	52	210045	207793	218514	212117	5652.95	17.6945	0.00668069	0.00661409	243227	260432	246204	249954	9195.2	17.9313	0.00835494	0.00835494	1.17838	0.236802	1.25061	0.322632	1.2632	0.337086		1	52	52	A R T Kac Q Tph A R K S T G G	H3 1-13	H3K4ac	H3T6ph
53	53	82960	81395	82659	82338	830.414	16.3293	0.000464961	0.000643055	82225	90379	83715	85439.7	4341.98	16.3826	0.00078576	0.00078576	1.03767	0.0533476	1.68995	0.756979	1.22192	0.289147		1	53	53	A R T K Q Tph A Rme K S T G G	H3 1-13	H3T6ph	H3R8me1
54	54	74815	75904	77457	76058.7	1327.77	16.2148	0.000164215	0.000354148	71057	72265	74279	72533.7	1627.72	16.1464	0.000191966	0.000191966	0.953654	-0.0684619	1.16899	0.225264	0.542049	-0.883504		1	54	54	A R T K Q Tph A Rme2a K S T G G	H3 1-13	H3T6ph	H3R8me2a
55	925	79429	74627	80376	78144	3082.4	16.2538	0.000264091	0.000450092	79721	81827	85602	82383.3	2979.71	16.3301	0.000645141	0.000645141	1.05425	0.0762174	2.44287	1.28858	1.43335	0.519392		1	55	925	10% K G K G K G K G K G K G K	NEGCTRL-1
56	926	521337	666053	641091	609494	77359.4	19.2173	0.0257129	0.024897	647871	671048	706794	675238	29684.1	19.365	0.0279219	0.0279219	1.10787	0.147784	1.08591	0.118904	1.12149	0.165421		1	56	926	10% Kac G Kac G Kac G Kac G Kac G Kac G Kac	POSCTRL-1
57	55	88171	88554	88324	88349.7	192.786	16.4309	0.000752888	0.000919647	94364	91089	91600	92351	1761.93	16.4948	0.00110374	0.00110374	1.04529	0.0639029	1.46601	0.5519	1.20018	0.263255		2	57	55	A R T K Q Tph A Rme2s K S T G G	H3 1-13	H3T6ph	H3R8me2s
58	56	89147	88331	86998	88158.7	1084.82	16.4278	0.00074374	0.000910859	91788	90672	94938	92466	2212.34	16.4966	0.00110904	0.00110904	1.04886	0.0688206	1.49116	0.576436	1.21757	0.284006		2	58	56	A R T K Q Tph A Rcit K S T G G	H3 1-13	H3T6ph	H3R8cit
59	57	89637	89119	88284	89013.3	682.661	16.4417	0.000784674	0.000950181	91086	93513	95341	93313.3	2134.52	16.5098	0.00114802	0.00114802	1.04831	0.0680618	1.46305	0.548984	1.20821	0.272874		2	59	57	A R T K Q T A R Kme Sph T G G	H3 1-13	H3K9me1	H3S10ph
60	58	86997	89195	88063	88085	1099.17	16.4266	0.000740212	0.000907469	112489	97852	94474	101605	9575.95	16.6326	0.00152951	0.00152951	1.15349	0.206003	2.06632	1.04706	1.68547	0.753152		2	60	58	A R T K Q T A R Kme2 Sph T G G	H3 1-13	H3K9me2	H3S10ph
61	59	93207	90135	92175	91839	1563.32	16.4868	0.000920008	0.00108019	99783	99962	99445	99730	262.543	16.6057	0.00144325	0.00144325	1.08592	0.118921	1.56873	0.649599	1.33611	0.418035		2	61	59	A R T K Q T A R Kme3 Sph T G G	H3 1-13	H3K9me3	H3S10ph
62	60	152669	162420	184131	166407	16105.4	17.3444	0.0044914	0.00451098	184370	181449	184618	183479	1762.4	17.4853	0.00529647	0.00529647	1.10259	0.140902	1.17925	0.237866	1.17413	0.231588		2	62	60	A R T K Q T A R Kac Sph T G G	H3 1-13	H3K9ac	H3S10ph
63	61	92253	93579	95471	93767.7	1617.27	16.5168	0.00101238	0.00116892	97345	101238	100296	99626.3	2031.06	16.6042	0.00143848	0.00143848	1.06248	0.0874366	1.42088	0.50679	1.2306	0.29936		2	63	61	A R T K Q T A Rme Kme S T G G	H3 1-13	H3R8me1	H3K9me1
64	62	89752	87139	87560	88150.3	1402.97	16.4277	0.000743341	0.000910475	91994	91028	92253	91758.3	645.608	16.4856	0.00107648	0.00107648	1.04093	0.0578732	1.44816	0.534221	1.18232	0.241625		2	64	62	A R T K Q T A Rme Kme2 S T G G	H3 1-13	H3R8me1	H3K9me2
65	63	103990	105174	99715	102960	2871.65	16.6517	0.00145263	0.00159184	107830	110126	107029	108328	1607.51	16.7251	0.00183885	0.00183885	1.05214	0.0733313	1.26588	0.340137	1.15517	0.208107		2	65	63	A R T K Q T A Rme Kme3 S T G G	H3 1-13	H3R8me1	H3K9me3
66	64	268791	263839	271427	268019	3852.46	18.032	0.00935808	0.00918608	308416	280010	278782	289069	16766	18.1411	0.0101546	0.0101546	1.07854	0.10908	1.08511	0.117847	1.10543	0.14461		2	66	64	A R T K Q T A Rme Kac S T G G	H3 1-13	H3R8me1	H3K9ac
67	65	97483	96586	98979	97682.7	1208.93	16.5758	0.00119989	0.00134905	103378	105148	100408	102978	2395.18	16.652	0.00159268	0.00159268	1.05421	0.0761617	1.32736	0.40856	1.1806	0.239516		2	67	65	A R T K Q T A Rme2a Kme S T G G	H3 1-13	H3R8me2a	H3K9me1
68	66	96850	91840	94176	94288.7	2506.9	16.5248	0.00103733	0.00119289	101822	100147	97269	99746	2302.84	16.606	0.00144398	0.00144398	1.05788	0.0811746	1.39201	0.477173	1.21049	0.275586		2	68	66	A R T K Q T A Rme2a Kme2 S T G G	H3 1-13	H3R8me2a	H3K9me2
69	67	103295	100798	104222	102772	1770.97	16.6491	0.00144362	0.00158319	105806	105336	108910	106684	1942.04	16.703	0.00176319	0.00176319	1.03807	0.0539012	1.22137	0.288496	1.1137	0.155356		2	69	67	A R T K Q T A Rme2a Kme3 S T G G	H3 1-13	H3R8me2a	H3K9me3
70	68	344924	326884	360326	344045	16738.3	18.3922	0.0129993	0.012684	365554	354112	376876	365514	11382.1	18.4796	0.0136717	0.0136717	1.0624	0.0873308	1.05173	0.072763	1.07788	0.108192		2	70	68	A R T K Q T A Rme2a Kac S T G G	H3 1-13	H3R8me2a	H3K9ac
71	69	95320	100947	94358	96875	3559.11	16.5638	0.00116121	0.00131189	101250	98734	99223	99735.7	1334.05	16.6058	0.00144351	0.00144351	1.02953	0.0419851	1.24311	0.313955	1.10033	0.137931		2	71	69	A R T K Q T A Rme2s Kme S T G G	H3 1-13	H3R8me2s	H3K9me1
72	70	91674	93826	92562	92687.3	1081.46	16.5001	0.000960639	0.00111922	94553	95403	97265	95740.3	1387.11	16.5468	0.00125968	0.00125968	1.03294	0.0467546	1.3113	0.390997	1.1255	0.170571		2	72	70	A R T K Q T A Rme2s Kme2 S T G G	H3 1-13	H3R8me2s	H3K9me2
73	71	88766	91469	88524	89586.3	1634.92	16.451	0.000812117	0.000976545	88688	89938	85842	88156	2099.18	16.4278	0.000910736	0.000910736	0.984034	-0.0232199	1.12143	0.165345	0.932611	-0.100653		2	73	71	A R T K Q T A Rme2s Kme3 S T G G	H3 1-13	H3R8me2s	H3K9me3
74	72	645230	638057	624210	635832	10685.1	19.2783	0.0269744	0.0261089	721392	673259	642208	678953	39897.9	19.373	0.0280928	0.0280928	1.06782	0.0946653	1.04146	0.0586119	1.07599	0.105661		2	74	72	A R T K Q T A Rme2s Kac S T G G	H3 1-13	H3R8me2s	H3K9ac
75	73	105606	102753	100872	103077	2383.57	16.6534	0.00145825	0.00159724	108274	105758	103805	105946	2240.4	16.693	0.00172922	0.00172922	1.02783	0.0396021	1.18582	0.245889	1.08263	0.114545		2	75	73	A R T K Q T A Rcit Kme S T G G	H3 1-13	H3R8cit	H3K9me1
76	74	97260	94812	94472	95514.7	1521.03	16.5434	0.00109605	0.0012493	100391	96641	99351	98794.3	1935.98	16.5921	0.0014002	0.0014002	1.03434	0.048706	1.27749	0.353313	1.12078	0.164507		2	76	74	A R T K Q T A Rcit Kme2 S T G G	H3 1-13	H3R8cit	H3K9me2
77	75	91656	92320	90928	91634.7	696.245	16.4836	0.000910222	0.00107079	95176	94354	95536	95022	605.861	16.536	0.00122664	0.00122664	1.03697	0.0523681	1.34762	0.430416	1.14555	0.196035		2	77	75	A R T K Q T A Rcit Kme3 S T G G	H3 1-13	H3R8cit	H3K9me3
78	76	478168	476683	423201	459351	31315.3	18.8092	0.0185218	0.0179891	637939	608934	667585	638153	29326.1	19.2835	0.0262156	0.0262156	1.38925	0.474306	1.41539	0.501199	1.45731	0.543304		2	78	76	A R T K Q T A Rcit Kac S T G G	H3 1-13	H3R8cit	H3K9ac
79	77	100697	109216	97554	102489	6033.99	16.6451	0.00143009	0.00157019	103913	100726	102407	102349	1594.3	16.6431	0.00156373	0.00156373	0.998631	-0.00197677	1.09345	0.128889	0.995888	-0.00594461		2	79	77	A R T Kme Q T A R Kme S T G G	H3 1-13	H3K4me1	H3K9me1
80	78	98969	98850	98451	98756.7	271.32	16.5916	0.00125133	0.00139846	101856	103075	102358	102430	612.652	16.6443	0.00156746	0.00156746	1.03719	0.0526836	1.25263	0.324966	1.12084	0.164582		2	80	78	A R T Kme Q T A R Kme2 S T G G	H3 1-13	H3K4me1	H3K9me2
81	79	100552	101154	99348	100351	919.57	16.6147	0.0013277	0.00147183	112766	104343	103493	106867	5126.04	16.7055	0.00177163	0.00177163	1.06493	0.0907611	1.33436	0.416144	1.20369	0.267462		2	81	79	A R T Kme Q T A R Kme3 S T G G	H3 1-13	H3K4me1	H3K9me3
82	80	494506	555084	500867	516819	33290.7	18.9793	0.0212743	0.0206332	680914	620246	596417	632526	43566.4	19.2708	0.0259567	0.0259567	1.22388	0.291465	1.2201	0.286999	1.25801	0.331144		2	82	80	A R T Kme Q T A R Kac S T G G	H3 1-13	H3K4me1	H3K9ac
83	81	106512	104247	106096	105618	1205.69	16.6885	0.00157996	0.00171416	108025	109276	106453	107918	1414.54	16.7196	0.00181997	0.00181997	1.02177	0.0310752	1.15191	0.204022	1.06172	0.0864093		2	83	81	A R T Kme2 Q T A R Kme S T G G	H3 1-13	H3K4me2	H3K9me1
84	82	101544	103933	105313	103597	1906.88	16.6606	0.00148314	0.00162115	103198	103516	104665	103793	771.731	16.6633	0.00163018	0.00163018	1.0019	0.00273157	1.09914	0.136381	1.00557	0.00801647		2	84	82	A R T Kme2 Q T A R Kme2 S T G G	H3 1-13	H3K4me2	H3K9me2
85	83	102215	99536	102007	101253	1490.31	16.6276	0.00137087	0.0015133	103749	103573	105809	104377	1243.27	16.6714	0.00165705	0.00165705	1.03086	0.0438439	1.20876	0.273524	1.09499	0.130917		2	85	83	A R T Kme2 Q T A R Kme3 S T G G	H3 1-13	H3K4me2	H3K9me3
86	84	315550	307965	311102	311539	3811.34	18.2491	0.0114425	0.0111884	334341	402350	342176	359622	37210	18.4561	0.0134007	0.0134007	1.15434	0.20707	1.17114	0.227909	1.19773	0.260302		2	86	84	A R T Kme2 Q T A R Kac S T G G	H3 1-13	H3K4me2	H3K9ac
87	85	104150	95947	99247	99781.3	4127.52	16.6065	0.0013004	0.00144561	100512	101958	99360	100610	1301.77	16.6184	0.00148373	0.00148373	1.0083	0.0119319	1.14098	0.190274	1.02637	0.0375563		2	87	85	A R T Kme3 Q T A R Kme S T G G	H3 1-13	H3K4me3	H3K9me1
88	86	119414	107532	100098	109015	9742.98	16.7342	0.00174263	0.00187043	103960	101481	99459	101633	2254.36	16.633	0.00153082	0.00153082	0.93229	-0.101149	0.878452	-0.186965	0.818432	-0.289065		2	88	86	A R T Kme3 Q T A R Kme2 S T G G	H3 1-13	H3K4me3	H3K9me2
89	87	91295	91407	91069	91257	172.174	16.4776	0.000892133	0.00105341	92033	91447	91509	91663	321.925	16.4841	0.00107209	0.00107209	1.00445	0.00640428	1.20172	0.265095	1.01773	0.0253586		2	89	87	A R T Kme3 Q T A R Kme3 S T G G	H3 1-13	H3K4me3	H3K9me3
90	88	145057	136360	136602	139340	4952.83	17.0882	0.00319503	0.00326565	155729	146979	162809	155172	7929.67	17.2435	0.0039941	0.0039941	1.11363	0.155265	1.2501	0.322039	1.22306	0.290499		2	90	88	A R T Kme3 Q T A R Kac S T G G	H3 1-13	H3K4me3	H3K9ac
91	921	14039272	14622598	11399608	13353826	1.71735e+06	23.6707	0.636098	0.611253	12178775	12976715	13700722	1.29521e+07	761273	23.6267	0.592769	0.592769	0.969915	-0.0440704	0.931883	-0.10178	0.96976	-0.0443007		2	91	921	A R T Kac Q T A R Kme S T G G	H3 1-13	H3K4ac	H3K9me1
92	922	226266	224555	229622	226814	2577.62	17.7912	0.0073846	0.00729029	223608	207364	223884	218285	9459.16	17.7359	0.00689788	0.00689788	0.962397	-0.0552966	0.934089	-0.0983675	0.946173	-0.0798236		2	92	922	A R T Kac Q T A R Kme2 S T G G	H3 1-13	H3K4ac	H3K9me2
93	923	423077	437252	444063	434797	10706.2	18.73	0.0173459	0.0168594	471357	461323	449955	460878	10707.9	18.814	0.0180594	0.0180594	1.05998	0.0840429	1.04113	0.0581561	1.07117	0.0991939		2	93	923	A R T Kac Q T A R Kme3 S T G G	H3 1-13	H3K4ac	H3K9me3
94	924	201470	199471	199828	200256	1066.12	17.6115	0.00611262	0.00606838	223843	204713	217811	215456	9780.08	17.717	0.00676769	0.00676769	1.0759	0.105543	1.10717	0.146873	1.11524	0.157352		2	94	924	A R T Kac Q T A R Kac S T G G	H3 1-13	H3K4ac	H3K9ac
95	897	101627	137986	124335	121316	18366.5	16.8884	0.0023318	0.0024364	157366	138120	149694	148393	9688.7	17.1791	0.00368221	0.00368221	1.2232	0.290656	1.57913	0.659127	1.51133	0.595819		2	95	897	A R T K Q Tph A R Kme S T G G	H3 1-13	H3T6ph	H3K9me1
96	898	132763	132449	97869	121027	20056	16.885	0.00231796	0.0024231	193109	104011	105859	134326	50915.7	17.0354	0.00303499	0.00303499	1.10989	0.150413	1.30934	0.38884	1.25252	0.324838		2	96	898	A R T K Q Tph A R Kme2 S T G G	H3 1-13	H3T6ph	H3K9me2
97	899	89228	89508	92561	90432.3	1848.79	16.4646	0.000852636	0.00101547	96604	93880	94241	94908.3	1479.54	16.5342	0.00122141	0.00122141	1.0495	0.0696961	1.4325	0.51854	1.2028	0.266397		2	97	899	A R T K Q Tph A R Kme3 S T G G	H3 1-13	H3T6ph	H3K9me3
98	900	465298	454770	412879	444316	27729.2	18.7612	0.0178017	0.0172973	526262	474940	466992	489398	32171.5	18.9006	0.0193715	0.0193715	1.10146	0.139423	1.08818	0.12192	1.11991	0.163388		2	98	900	A R T K Q Tph A R Kac S T G G	H3 1-13	H3T6ph	H3K9ac
99	901	97308	103985	105777	102357	4463.14	16.6432	0.00142375	0.0015641	102760	138066	100584	113803	21040.2	16.7962	0.00209075	0.00209075	1.11183	0.152938	1.46848	0.554326	1.33671	0.41869		2	99	901	A R Tph K Q T A R Kme S T G G	H3 1-13	H3T3ph	H3K9me1
100	902	114853	95012	112977	107614	10953.9	16.7155	0.00167555	0.00180598	107698	117338	109453	111496	5134.57	16.7666	0.00198461	0.00198461	1.03608	0.0511305	1.18445	0.244221	1.09891	0.136068		2	100	902	A R Tph K Q T A R Kme2 S T G G	H3 1-13	H3T3ph	H3K9me2
101	903	92278	89874	90950	91034	1204.2	16.4741	0.000881453	0.00104315	94507	95805	94334	94882	804.008	16.5338	0.00122019	0.00122019	1.04227	0.0597289	1.3843	0.469155	1.16972	0.226163		2	101	903	A R Tph K Q T A R Kme3 S T G G	H3 1-13	H3T3ph	H3K9me3
102	904	163622	167538	170695	167285	3543.28	17.3519	0.00453347	0.0045514	180436	177468	176008	177971	2256.39	17.4413	0.00504303	0.00504303	1.06388	0.0893314	1.1124	0.153677	1.10802	0.147983		2	102	904	A R Tph K Q T A R Kac S T G G	H3 1-13	H3T3ph	H3K9ac
103	905	97562	98915	112407	102961	8208.11	16.6517	0.00145271	0.00159192	102058	126857	117291	115402	12507	16.8163	0.0021643	0.0021643	1.12083	0.164566	1.48984	0.575157	1.35956	0.443136		2	103	905	A Rme T K Q T A R Kme1 S T G G	H3 1-13	H3R2me1	H3K9me1
104	906	127080	106428	93345	108951	17008.4	16.7333	0.00173958	0.0018675	108080	99458	109249	105596	5347.42	16.6882	0.00171312	0.00171312	0.969203	-0.0451288	0.984789	-0.022113	0.917335	-0.124479		2	104	906	A Rme T K Q T A R Kme2 S T G G	H3 1-13	H3R2me1	H3K9me2
105	907	93516	92517	94333	93455.3	909.519	16.512	0.000997422	0.00115455	96691	98964	99055	98236.7	1339.36	16.584	0.00137454	0.00137454	1.05116	0.0719846	1.37809	0.462673	1.19054	0.251612		2	105	907	A Rme T K Q T A R Kme3 S T G G	H3 1-13	H3R2me1	H3K9me3
106	908	158986	149469	151770	153408	4965.52	17.227	0.00386885	0.00391294	168131	183520	171252	174301	8134.96	17.4112	0.0048742	0.0048742	1.13619	0.184204	1.25986	0.33326	1.24566	0.316911		2	106	908	A Rme T K Q T A R Kac S T G G	H3 1-13	H3R2me1	H3K9ac
107	909	111592	111110	150857	124520	22810.1	16.926	0.00248524	0.0025838	114633	121644	180514	138930	36182.7	17.084	0.00324682	0.00324682	1.11573	0.157988	1.30644	0.385645	1.25661	0.329534		2	107	909	A Rme2a T K Q T A R Kme S T G G	H3 1-13	H3R2me2a	H3K9me1
108	910	99180	105707	94842	99909.7	5469.13	16.6083	0.00130655	0.00145151	92486	91563	90578	91542.3	954.168	16.4822	0.00106654	0.00106654	0.916251	-0.126185	0.816302	-0.292826	0.734777	-0.444621		2	108	910	A Rme2a T K Q T A R Kme2 S T G G	H3 1-13	H3R2me2a	H3K9me2
109	911	88355	85845	90769	88323	2462.16	16.4305	0.00075161	0.00091842	95581	92569	93338	93829.3	1564.96	16.5178	0.00117176	0.00117176	1.06234	0.0872498	1.559	0.640622	1.27585	0.351453		2	109	911	A Rme2a T K Q T A R Kme3 S T G G	H3 1-13	H3R2me2a	H3K9me3
110	912	114581	112580	115402	114188	1451.54	16.801	0.00199039	0.00210843	125657	119562	135995	127071	8307.29	16.9553	0.0027012	0.0027012	1.11283	0.154232	1.35712	0.440549	1.28114	0.357429		2	110	912	A Rme2a T K Q T A R Kac S T G G	H3 1-13	H3R2me2a	H3K9ac
111	BLANK-2	89557	88245	90375	89392.3	1074.51	16.4479	0.000802826	0.000967619	91795	89717	95547	92353	2954.78	16.4949	0.00110384	0.00110384	1.03312	0.0470077	1.37494	0.459368	1.14078	0.190016		2	111			BLANK-2
112	NEGCTRL-2	150389	146198	152416	149668	3171.14	17.1914	0.00368969	0.00374084	163621	153719	148840	155393	7531.4	17.2456	0.00400427	0.00400427	1.03826	0.054162	1.08526	0.118039	1.07042	0.0981782		2	112	481	5% S G Rme G K G G K G L G K G	NEGCTRL-2
113	913	94296	88846	94914	92685.3	3339.29	16.5001	0.000960543	0.00111913	96083	88636	92314	92344.3	3723.59	16.4947	0.00110344	0.00110344	0.996321	-0.00531763	1.14876	0.200084	0.985981	-0.0203684		3	113	913	A Rme2s T K Q T A R Kme S T G G	H3 1-13	H3R2me2s	H3K9me1
114	914	88267	91020	95857	91714.7	3842.39	16.4849	0.000914053	0.00107447	88611	87016	86718	87448.3	1017.86	16.4161	0.000878177	0.000878177	0.953483	-0.0687216	0.960751	-0.0577663	0.817314	-0.291038		3	114	914	A Rme2s T K Q T A R Kme2 S T G G	H3 1-13	H3R2me2s	H3K9me2
115	915	90537	90234	88760	89843.7	950.633	16.4551	0.000824442	0.000988384	86391	85180	83539	85036.7	1431.39	16.3758	0.000767218	0.000767218	0.946496	-0.0793318	0.930591	-0.103781	0.776235	-0.365435		3	115	915	A Rme2s T K Q T A R Kme3 S T G G	H3 1-13	H3R2me2s	H3K9me3
116	916	214690	225891	215658	218746	6206.36	17.7389	0.00699819	0.00691909	226902	217965	208361	217743	9272.5	17.7323	0.00687291	0.00687291	0.995412	-0.0066347	0.982099	-0.0260602	0.993326	-0.00966079		3	116	916	A Rme2s T K Q T A R Kac S T G G	H3 1-13	H3R2me2s	H3K9ac
117	917	92393	93271	90033	91899	1674.57	16.4878	0.000922882	0.00108295	81014	91950	89619	87527.7	5760.15	16.4175	0.000881827	0.000881827	0.952433	-0.0703101	0.955515	-0.06565	0.814283	-0.296397		3	117	917	A Rcit T K Q T A R Kme S T G G	H3 1-13	H3R2cit	H3K9me1
118	918	94949	88183	92245	91792.3	3405.64	16.4861	0.000917773	0.00107804	89520	94509	88868	90965.7	3085.88	16.473	0.00104001	0.00104001	0.990994	-0.0130515	1.13319	0.180383	0.964719	-0.0518192		3	118	918	A Rcit T K Q T A R Kme2 S T G G	H3 1-13	H3R2cit	H3K9me2
119	919	104875	96577	96371	99274.3	4851.41	16.5991	0.00127612	0.00142228	91213	92935	88853	91000.3	2049.29	16.4736	0.0010416	0.0010416	0.916655	-0.125549	0.816225	-0.292961	0.732346	-0.449403		3	119	919	A Rcit T K Q T A R Kme3 S T G G	H3 1-13	H3R2cit	H3K9me3
120	920	163857	153596	183276	166910	15073.6	17.3487	0.00451549	0.00453413	176418	173935	156996	169116	10569.7	17.3677	0.00463565	0.00463565	1.01322	0.0189485	1.02661	0.0378902	1.02239	0.0319481		3	120	920	A Rcit T K Q T A R Kac S T G G	H3 1-13	H3R2cit	H3K9ac
126	89	299274	312549	323561	311795	12161.1	18.2502	0.0114547	0.0112002	377643	350952	363732	364109	13349.5	18.474	0.0136071	0.0136071	1.16778	0.223774	1.18791	0.24842	1.2149	0.28084		3	126	A89	Q T A R K S T G G K A P R	H3 5-17
127	90	299683	318902	347590	322058	24109	18.297	0.0119463	0.0116724	370271	338851	331944	347022	20428.3	18.4047	0.0128209	0.0128209	1.07751	0.107705	1.07322	0.101941	1.0984	0.135403		3	127	A90	Q T A Rme K S T G G K A P R	H3 5-17	H3R8me1
128	91	367832	380449	346152	364811	17346.9	18.4768	0.0139939	0.0136394	359145	371987	349288	360140	11382.2	18.4582	0.0134245	0.0134245	0.987196	-0.0185914	0.95931	-0.0599306	0.984244	-0.0229128		3	128	A91	Q T A Rme2a K S T G G K A P R	H3 5-17	H3R8me2a
129	92	92861	95201	92975	93679	1319.32	16.5154	0.00100813	0.00116484	85129	85761	82735	84541.7	1596.21	16.3674	0.000744444	0.000744444	0.902461	-0.148063	0.738437	-0.437453	0.639093	-0.645903		3	129	A92	Q T A Rme2s K S T G G K A P R	H3 5-17	H3R8me2s
130	93	111134	104801	101569	105835	4865.56	16.6915	0.00159033	0.00172412	92671	101336	102143	98716.7	5251.23	16.591	0.00139662	0.00139662	0.932744	-0.100447	0.8782	-0.187379	0.810052	-0.303914		3	130	A93	Q T A Rcit K S T G G K A P R	H3 5-17	H3R8cit
131	94	206285	204124	188391	199600	9767.23	17.6068	0.00608118	0.00603818	208898	208640	211577	209705	1626.32	17.678	0.0065031	0.0065031	1.05063	0.0712495	1.06938	0.0967769	1.077	0.107014		3	131	A94	Q T A R Kme S T G G K A P R	H3 5-17	H3K9me1
132	95	349401	347799	372756	356652	13969.5	18.4442	0.0136031	0.013264	358135	363359	364011	361835	3220.83	18.465	0.0135025	0.0135025	1.01453	0.0208149	0.992601	-0.0107143	1.01798	0.0257069		3	132	A95	Q T A R Kme2 S T G G K A P R	H3 5-17	H3K9me2
133	96	251844	240305	241283	244477	6398.43	17.8993	0.00823056	0.00810295	277102	263451	253004	264519	12084.4	18.013	0.00902505	0.00902505	1.08198	0.113671	1.09653	0.132944	1.1138	0.155488		3	133	A96	Q T A R Kme3 S T G G K A P R	H3 5-17	H3K9me3
134	97	487158	521368	433123	480550	44492.1	18.8743	0.0195372	0.0189644	474671	439228	432877	448925	22521.4	18.7761	0.0175094	0.0175094	0.934191	-0.09821	0.896212	-0.158089	0.923277	-0.115165		3	134	A97	Q T A R Kac S T G G K A P R	H3 5-17	H3K9ac
135	98	94194	100162	99975	98110.3	3392.93	16.5821	0.00122037	0.00136873	90276	89270	89542	89696	520.381	16.4528	0.00098159	0.00098159	0.914236	-0.129361	0.804337	-0.314127	0.717156	-0.479642		3	135	98	Q T A R K Sph T G G K A P R	H3 5-17	H3S10ph
136	99	105987	98029	100264	101427	4104.42	16.6301	0.00137921	0.00152131	100258	101640	98510	100136	1568.56	16.6116	0.00146193	0.00146193	0.987275	-0.0184763	1.05998	0.0840325	0.960966	-0.0574425		3	136	99	Q T A R K S Tph G G K A P R	H3 5-17	H3T11ph
137	100	93668	94211	94255	94044.7	326.944	16.5211	0.00102565	0.00118167	93495	92055	90809	92119.7	1344.17	16.4912	0.0010931	0.0010931	0.979531	-0.0298369	1.06577	0.0918918	0.925049	-0.112399		3	137	A100	Q T A R K S T G G Kme A P R	H3 5-17	H3K14me1
138	101	89795	92368	90275	90812.7	1368.17	16.4706	0.000870852	0.00103297	85067	82327	77374	81589.3	3899.19	16.3161	0.000608609	0.000608609	0.898436	-0.154513	0.698866	-0.516911	0.589185	-0.763206		3	138	A101	Q T A R K S T G G Kme2 A P R	H3 5-17	H3K14me2
139	102	86860	86555	86713	86709.3	152.533	16.4039	0.000674324	0.000844176	82689	79496	79650	80611.7	1800.67	16.2987	0.000563628	0.000563628	0.929677	-0.105199	0.83584	-0.258701	0.667666	-0.582802		3	139	A102	Q T A R K S T G G Kme3 A P R	H3 5-17	H3K14me3
140	103	275490	289871	286941	284101	7599.6	18.116	0.0101283	0.00992599	337556	320387	330050	329331	8607.05	18.3292	0.012007	0.012007	1.15921	0.213136	1.18549	0.245482	1.20965	0.274593		3	140	A103	Q T A R K S T G G Kac A P R	H3 5-17	H3K14ac
141	104	94006	92204	94180	93463.3	1094.08	16.5121	0.000997805	0.00115492	89616	89542	85268	88142	2489.23	16.4275	0.000910092	0.000910092	0.943065	-0.0845709	0.912094	-0.132745	0.788012	-0.343711		3	141	A104	Q T A Rme Kme S T G G K A P R	H3 5-17	H3R8me1	H3K9me1
142	105	95670	95153	96673	95832	772.841	16.5482	0.00111125	0.0012639	93475	86883	90151	90169.7	3296.04	16.4604	0.00100338	0.00100338	0.940914	-0.0878653	0.902931	-0.147312	0.793877	-0.333012		3	142	A105	Q T A Rme Kme2 S T G G K A P R	H3 5-17	H3R8me1	H3K9me2
143	106	89849	92357	93094	91766.7	1701.14	16.4857	0.000916544	0.00107686	80436	92845	91417	88232.7	6789.76	16.429	0.000914263	0.000914263	0.961489	-0.0566573	0.997512	-0.00359352	0.849009	-0.236149		3	143	A106	Q T A Rme Kme3 S T G G K A P R	H3 5-17	H3R8me1	H3K9me3
144	107	283615	295683	334347	304548	26502.4	18.2163	0.0111076	0.0108668	332282	333484	360515	342094	15964.7	18.384	0.0125942	0.0125942	1.12328	0.16772	1.13383	0.181206	1.15896	0.212836		3	144	A107	Q T A Rme Kac S T G G K A P R	H3 5-17	H3R8me1	H3K9ac
145	108	96315	90945	94539	93933	2735.81	16.5193	0.0010203	0.00117653	93225	87080	87120	89141.7	3536.33	16.4438	0.000956086	0.000956086	0.948992	-0.0755322	0.937064	-0.0937805	0.812631	-0.299327		3	145	A108	Q T A Rme2a Kme S T G G K A P R	H3 5-17	H3R8me2a	H3K9me1
146	109	93296	95012	94635	94314.3	901.823	16.5252	0.00103856	0.00119408	89571	85304	83589	86154.7	3080.39	16.3946	0.000818656	0.000818656	0.913484	-0.130548	0.788259	-0.343259	0.685598	-0.544565		3	146	A109	Q T A Rme2a Kme2 S T G G K A P R	H3 5-17	H3R8me2a	H3K9me2
147	110	103480	88361	92429	94756.7	7823.65	16.5319	0.00105975	0.00121443	83405	79794	88688	83962.3	4473.12	16.3575	0.000717789	0.000717789	0.886084	-0.174485	0.67732	-0.56209	0.591051	-0.758644		3	147	A110	Q T A Rme2a Kme3 S T G G K A P R	H3 5-17	H3R8me2a	H3K9me3
148	111	103338	107455	106367	105720	2133.4	16.6899	0.00158483	0.00171884	104044	107770	102995	104936	2509.45	16.6792	0.00168279	0.00168279	0.992587	-0.010734	1.06181	0.0865199	0.979023	-0.0305851		3	148	A111	Q T A Rme2a Kac S T G G K A P R	H3 5-17	H3R8me2a	H3K9ac
149	112	108633	103530	99900	104021	4387.16	16.6665	0.00150346	0.00164067	99143	107955	100244	102447	4801.44	16.6445	0.00156827	0.00156827	0.984872	-0.0219924	1.04311	0.0608857	0.95587	-0.0651139		3	149	A112	Q T A Rme2s Kme S T G G K A P R	H3 5-17	H3R8me2s	H3K9me1
150	113	102721	103168	107992	104627	2922.73	16.6749	0.00153248	0.00166855	105938	105582	94964	102161	6235.61	16.6405	0.00155511	0.00155511	0.976434	-0.0344059	1.01476	0.021144	0.932011	-0.101581		3	150	A113	Q T A Rme2s Kme2 S T G G K A P R	H3 5-17	H3R8me2s	H3K9me2
151	114	89187	88775	99010	92324	5793.91	16.4944	0.000943237	0.0011025	82179	76056	75688	77974.3	3645.99	16.2507	0.000442286	0.000442286	0.844573	-0.243706	0.468902	-1.09264	0.401166	-1.31773		3	151	A114	Q T A Rme2s Kme3 S T G G K A P R	H3 5-17	H3R8me2s	H3K9me3
152	115	140368	140673	146749	142597	3599.26	17.1216	0.00335103	0.00341551	154089	153056	147044	151396	3804.45	17.208	0.00382037	0.00382037	1.06171	0.08639	1.14006	0.189109	1.11854	0.161614		3	152	A115	Q T A Rme2s Kac S T G G K A P R	H3 5-17	H3R8me2s	H3K9ac
153	116	93862	90550	89441	91284.3	2300.16	16.4781	0.000893442	0.00105467	91183	90584	91166	90977.7	341.031	16.4732	0.00104056	0.00104056	0.996641	-0.00485485	1.16466	0.219912	0.986622	-0.0194308		3	153	A116	Q T A Rcit Kme S T G G K A P R	H3 5-17	H3R8cit	H3K9me1
154	117	84451	84864	83894	84403	486.778	16.365	0.000563864	0.000738064	90047	88907	85308	88087.3	2473.54	16.4266	0.000907577	0.000907577	1.04365	0.0616403	1.60957	0.686674	1.22967	0.298274		3	154	A117	Q T A Rcit Kme2 S T G G K A P R	H3 5-17	H3R8cit	H3K9me2
155	118	88684	90199	89234	89372.3	766.915	16.4475	0.000801868	0.000966699	85679	82707	83278	83888	1577.11	16.3562	0.000714369	0.000714369	0.938635	-0.0913638	0.890881	-0.166695	0.738978	-0.436397		3	155	A118	Q T A Rcit Kme3 S T G G K A P R	H3 5-17	H3R8cit	H3K9me3
156	119	726611	586054	712560	675075	77413.9	19.3647	0.0288539	0.0279144	823986	805249	781158	803464	21469.7	19.6159	0.0338215	0.0338215	1.19019	0.251186	1.17216	0.229174	1.21161	0.276931		3	156	A119	Q T A Rcit Kac S T G G K A P R	H3 5-17	H3R8cit	H3K9ac
157	120	93799	92321	87710	91276.7	3176	16.478	0.000893075	0.00105432	87646	84964	86680	86430	1358.37	16.3992	0.000831324	0.000831324	0.946901	-0.0787139	0.930856	-0.10337	0.788497	-0.342823		3	157	120	Q T A Rme K Sph T G G K A P R	H3 5-17	H3R8me1	H3S10ph
158	121	98443	88157	89280	91960	5642.45	16.4887	0.000925803	0.00108575	88881	90026	88529	89145.3	782.724	16.4439	0.000956255	0.000956255	0.969392	-0.0448472	1.03289	0.0466891	0.880728	-0.183232		3	158	121	Q T A Rme2a K Sph T G G K A P R	H3 5-17	H3R8me2a	H3S10ph
159	122	88974	88522	88411	88635.7	298.215	16.4356	0.000766586	0.000932805	88436	85235	81447	85039.3	3498.61	16.3758	0.000767341	0.000767341	0.959426	-0.0597571	1.00099	0.00142088	0.822616	-0.281708		3	159	122	Q T A Rme2s K Sph T G G K A P R	H3 5-17	H3R8me2s	H3S10ph
160	123	88818	87014	91527	89119.7	2271.57	16.4435	0.000789767	0.000955074	77096	76286	97154	83512	11821.3	16.3497	0.00069707	0.00069707	0.937077	-0.0937603	0.882627	-0.180124	0.729859	-0.454309		3	160	123	Q T A Rcit K Sph T G G K A P R	H3 5-17	H3R8cit	H3S10ph
161	124	101088	97601	97103	98597.3	2171.31	16.5893	0.0012437	0.00139113	97438	94996	93986	95473.3	1774.81	16.5428	0.0012474	0.0012474	0.968316	-0.0464508	1.00298	0.00429103	0.896679	-0.157336		3	161	124	Q T A Rme K S Tph G G K A P R	H3 5-17	H3R8me1	H3T11ph
162	125	86080	87860	85106	86348.7	1396.52	16.3979	0.00065705	0.000827582	82616	86203	85471	84763.3	1895.32	16.3712	0.000754642	0.000754642	0.98164	-0.0267336	1.14853	0.199789	0.911864	-0.13311		3	162	125	Q T A Rme2a K S Tph G G K A P R	H3 5-17	H3R8me2a	H3T11ph
163	126	85956	86179	86151	86095.3	121.476	16.3936	0.000644917	0.000815927	85515	83190	80814	83173	2350.55	16.3438	0.000681472	0.000681472	0.966057	-0.0498198	1.05668	0.0795414	0.835213	-0.259784		3	163	126	Q T A Rme2s K S Tph G G K A P R	H3 5-17	H3R8me2s	H3T11ph
164	127	87440	95405	84664	89169.7	5575.49	16.4443	0.000792161	0.000957374	79523	74175	74675	76124.3	2953.93	16.2161	0.000357169	0.000357169	0.853702	-0.228195	0.450879	-1.14919	0.373072	-1.42248		3	164	127	Q T A Rcit K S Tph G G K A P R	H3 5-17	H3R8cit	H3T11ph
165	128	91813	90912	91281	91335.3	452.951	16.4789	0.000895885	0.00105701	97414	90026	90939	92793	4027.86	16.5017	0.00112408	0.00112408	1.01596	0.0228429	1.25472	0.32736	1.06345	0.0887502		3	165	128	Q T A R Kme Sph T G G K A P R	H3 5-17	H3K9me1	H3S10ph
166	129	89928	94523	91605	92018.7	2325.26	16.4896	0.000928613	0.00108845	84381	85922	88004	86102.3	1818.22	16.3938	0.000816249	0.000816249	0.935705	-0.0958742	0.878998	-0.186069	0.749915	-0.4152		3	166	129	Q T A R Kme2 Sph T G G K A P R	H3 5-17	H3K9me2	H3S10ph
167	BLANK-3	86615	85403	88643	86887	1637.04	16.4069	0.000682834	0.00085235	88821	82719	81088	84209.3	4076.23	16.3617	0.000729153	0.000729153	0.969182	-0.0451602	1.06783	0.0946877	0.855462	-0.225225		3	167			BLANK-3
168	540	118107	114943	110668	114573	3733.3	16.8059	0.00200883	0.00212614	105473	100990	96904	101122	4286.03	16.6257	0.00150731	0.00150731	0.882604	-0.180161	0.750341	-0.414382	0.708939	-0.496267		3	168	540	10% K R H Rcit Kme V L R D N I Q G	NEGCTRL-3
169	130	87205	90375	87674	88418	1710.96	16.4321	0.00075616	0.000922791	83105	85668	80954	83242.3	2360	16.345	0.000684662	0.000684662	0.941464	-0.0870227	0.905446	-0.1433	0.741948	-0.43061		4	169	130	Q T A R Kme3 Sph T G G K A P R	H3 5-17	H3K9me3	H3S10ph
170	131	2737095	3250317	4460953	3.48279e+06	885129	21.7318	0.163328	0.157095	4253499	4388364	4363714	4.33519e+06	71814	22.0477	0.196313	0.196313	1.24475	0.315853	1.20196	0.265384	1.24965	0.321521		4	170	131	Q T A R Kac Sph T G G K A P R	H3 5-17	H3K9ac	H3S10ph
171	132	91516	96916	85028	91153.3	5952.29	16.476	0.000887168	0.00104864	90082	93162	103133	95459	6821.97	16.5426	0.00124674	0.00124674	1.04724	0.0665858	1.4053	0.490882	1.18891	0.249641		4	171	132	Q T A R Kme S Tph G G K A P R	H3 5-17	H3K9me1	H3T11ph
172	133	91325	95330	92688	93114.3	2036.25	16.5067	0.00098109	0.00113886	94908	94910	99271	96363	2518.4	16.5562	0.00128833	0.00128833	1.03489	0.049476	1.31317	0.393049	1.13124	0.177909		4	172	133	Q T A R Kme2 S Tph G G K A P R	H3 5-17	H3K9me2	H3T11ph
173	134	93706	79925	85044	86225	6965.99	16.3958	0.000651128	0.000821892	96622	76268	73384	82091.3	12666.3	16.3249	0.000631706	0.000631706	0.95206	-0.0708763	0.970172	-0.0436872	0.768599	-0.379697		4	173	134	Q T A R Kme3 S Tph G G K A P R	H3 5-17	H3K9me3	H3T11ph
174	135	595844	532232	670673	599583	69296.2	19.1936	0.0252382	0.0244411	615142	569517	848327	677662	149550	19.3702	0.0280334	0.0280334	1.13022	0.176606	1.11075	0.151537	1.14698	0.19784		4	174	135	Q T A R Kac S Tph G G K A P R	H3 5-17	H3K9ac	H3T11ph
175	136	89584	89464	86417	88488.3	1794.83	16.4332	0.000759529	0.000926026	91662	93156	95435	93417.7	1900.06	16.5114	0.00115282	0.00115282	1.05571	0.0782082	1.51781	0.601992	1.24491	0.316043		4	175	136	Q T A R K Sph Tph G G K A P R	H3 5-17	H3S10ph	H3T11ph
176	137	81884	90601	90542	87675.7	5015.82	16.4199	0.000720607	0.000888636	86761	88138	173682	116194	49791.1	16.8262	0.00220073	0.00220073	1.32527	0.406283	3.05399	1.6107	2.47652	1.30831		4	176	137	Q T A R K S Tph G G Kme A P R	H3 5-17	H3T11ph	H3K14me1
177	138	97946	103094	79911	93650.3	12173.8	16.515	0.00100676	0.00116353	98753	103531	80081	94121.7	12392	16.5222	0.00118521	0.00118521	1.00503	0.00724274	1.17725	0.235423	1.01864	0.0266413		4	177	138	Q T A R K S Tph G G Kme2 A P R	H3 5-17	H3T11ph	H3K14me2
178	139	77239	78790	76690	77573	1089.11	16.2433	0.000236743	0.000423821	76927	74092	76697	75905.3	1574.6	16.2119	0.000347093	0.000347093	0.978502	-0.0313533	1.46612	0.552	0.818961	-0.288133		4	178	139	Q T A R K S Tph G G Kme3 A P R	H3 5-17	H3T11ph	H3K14me3
179	140	219810	224734	213408	219317	5679.05	17.7427	0.00702554	0.00694536	302054	288347	341384	310595	27530.8	18.2447	0.011145	0.011145	1.41619	0.502015	1.58635	0.665712	1.60466	0.682271		4	179	140	Q T A R K S Tph G G Kac A P R	H3 5-17	H3T11ph	H3K14ac
180	141	86163	84689	93799	88217	4890.01	16.4288	0.000746534	0.000913543	86354	80538	89597	85496.3	4590	16.3836	0.000788367	0.000788367	0.969159	-0.0451942	1.05604	0.0786603	0.862978	-0.212605		4	180	141	Q T A R K Sph T G G Kme A P R	H3 5-17	H3S10ph	H3K14me1
181	142	133027	110060	105001	116029	14936.2	16.8241	0.0020786	0.00219316	104857	109235	114169	109420	4658.77	16.7395	0.00188909	0.00188909	0.94304	-0.0846087	0.90883	-0.137917	0.861354	-0.215323		4	181	142	Q T A R K Sph T G G Kme2 A P R	H3 5-17	H3S10ph	H3K14me2
182	143	79363	78126	77598	78362.3	905.923	16.2579	0.000274548	0.000460138	78871	78271	77820	78320.7	527.257	16.2571	0.000458221	0.000458221	0.999468	-0.000767311	1.669	0.738984	0.995834	-0.00602318		4	182	143	Q T A R K Sph T G G Kme3 A P R	H3 5-17	H3S10ph	H3K14me3
183	144	110817	112357	112699	111958	1002.54	16.7726	0.00188358	0.00200583	115987	152628	174055	147557	29364.3	17.1709	0.00364371	0.00364371	1.31797	0.398316	1.93446	0.951928	1.81656	0.861209		4	183	144	Q T A R K Sph T G G Kac A P R	H3 5-17	H3S10ph	H3K14ac
184	145	82741	88555	100158	90484.7	8867.39	16.4654	0.000855143	0.00101788	86805	84921	91521	87749	3399.76	16.4211	0.00089201	0.00089201	0.969767	-0.0442907	1.04311	0.0608953	0.876345	-0.19043		4	184	A145	Q T A R Kme S T G G Kme A P R	H3 5-17	H3K9me1	H3K14me1
185	146	86779	90136	87893	88269.3	1709.85	16.4296	0.00074904	0.00091595	86880	89859	91365	89368	2282.46	16.4475	0.000966499	0.000966499	1.01245	0.017846	1.29032	0.367726	1.05519	0.077499		4	185	A146	Q T A R Kme S T G G Kme2 A P R	H3 5-17	H3K9me1	H3K14me2
186	147	87899	75676	74557	79377.3	7401.16	16.2764	0.000323161	0.000506837	88015	72388	72403	77602	9017.93	16.2438	0.000425155	0.000425155	0.977634	-0.0326333	1.31561	0.395737	0.83884	-0.253532		4	186	A147	Q T A R Kme S T G G Kme3 A P R	H3 5-17	H3K9me1	H3K14me3
187	148	123813	132785	114659	123752	9063.15	16.9171	0.00244849	0.00254849	127196	126044	135932	129724	5407.05	16.9851	0.00282325	0.00282325	1.04825	0.0679897	1.15306	0.205465	1.10781	0.14771		4	187	A148	Q T A R Kme S T G G Kac A P R	H3 5-17	H3K9me1	H3K14ac
188	149	75645	78928	79757	78110	2174.62	16.2532	0.000262463	0.000448528	75299	81103	85572	80658	5150.94	16.2995	0.000565759	0.000565759	1.03262	0.0463104	2.15558	1.10808	1.26137	0.33499		4	188	A149	Q T A R Kme2 S T G G Kme A P R	H3 5-17	H3K9me2	H3K14me1
189	150	83598	88652	84736	85662	2651.2	16.3864	0.000624163	0.000795989	87586	91440	91337	90121	2195.98	16.4596	0.00100114	0.00100114	1.05205	0.073208	1.60398	0.681655	1.25774	0.330829		4	189	A150	Q T A R Kme2 S T G G Kme2 A P R	H3 5-17	H3K9me2	H3K14me2
190	151	83491	86053	72643	80729	7118.88	16.3008	0.000387899	0.000569026	87429	87995	71553	82325.7	9333.69	16.3291	0.000642487	0.000642487	1.01978	0.0282553	1.65633	0.727988	1.1291	0.175173		4	190	A151	Q T A R Kme2 S T G G Kme3 A P R	H3 5-17	H3K9me2	H3K14me3
191	152	86375	85414	91162	87650.3	3078.92	16.4195	0.000719393	0.000887471	98720	95455	95345	96506.7	1917.59	16.5583	0.00129494	0.00129494	1.10104	0.138869	1.80005	0.848036	1.45914	0.545117		4	191	A152	Q T A R Kme2 S T G G Kac A P R	H3 5-17	H3K9me2	H3K14ac
192	153	711932	85185	78019	291712	363939	18.1542	0.0104929	0.0102762	109207	80959	83161	91109	15712	16.4753	0.0010466	0.0010466	0.312325	-1.67888	0.0997442	-3.32562	0.101847	-3.29552		4	192	A153	Q T A R Kme3 S T G G Kme A P R	H3 5-17	H3K9me3	H3K14me1
193	154	80702	86911	89003	85538.7	4317.31	16.3843	0.000618256	0.000790315	81101	78197	86282	81860	4095.59	16.3209	0.000621062	0.000621062	0.956994	-0.0634181	1.00454	0.00653428	0.785842	-0.347689		4	193	A154	Q T A R Kme3 S T G G Kme2 A P R	H3 5-17	H3K9me3	H3K14me2
194	155	91471	89855	95208	92178	2745.64	16.4921	0.000936244	0.00109578	93361	94486	97562	95136.3	2174.7	16.5377	0.0012319	0.0012319	1.03209	0.045574	1.31578	0.395923	1.12421	0.168915		4	194	A155	Q T A R Kme3 S T G G Kme3 A P R	H3 5-17	H3K9me3	H3K14me3
195	156	86152	86379	85831	86120.7	275.34	16.3941	0.000646131	0.000817092	94847	91598	93690	93378.3	1646.77	16.5108	0.00115101	0.00115101	1.08427	0.116728	1.78139	0.833005	1.40867	0.494331		4	195	A156	Q T A R Kme3 S T G G Kac A P R	H3 5-17	H3K9me3	H3K14ac
196	157	147928	127712	140570	138737	10231.9	17.082	0.00316615	0.00323791	163801	180113	141572	161829	19346.1	17.3041	0.00430035	0.00430035	1.16644	0.222118	1.35823	0.441724	1.32813	0.409392		4	196	A157	Q T A R Kac S T G G Kme A P R	H3 5-17	H3K9ac	H3K14me1
197	158	162332	140765	196667	166588	28193	17.3459	0.00450008	0.00451933	157067	163721	206405	175731	26772	17.423	0.00493999	0.00493999	1.05488	0.0770842	1.09775	0.134556	1.09308	0.1284		4	197	A158	Q T A R Kac S T G G Kme2 A P R	H3 5-17	H3K9ac	H3K14me2
198	159	193952	185236	200693	193294	7749.5	17.5604	0.00577914	0.00574803	179169	236202	231201	215524	31583.5	17.7175	0.00677083	0.00677083	1.11501	0.157054	1.1716	0.228478	1.17794	0.236265		4	198	A159	Q T A R Kac S T G G Kme3 A P R	H3 5-17	H3K9ac	H3K14me3
199	160	586226	257618	272612	372152	185545	18.5055	0.0143455	0.0139772	701479	331771	385969	473073	199653	18.8517	0.0186204	0.0186204	1.27118	0.346171	1.298	0.37629	1.33221	0.413817		4	199	A160	Q T A R Kac S T G G Kac A P R	H3 5-17	H3K9ac	H3K14ac
200	161	77660	78205	79442	78435.7	913.119	16.2592	0.00027806	0.000463512	81425	83950	89231	84868.7	3983.26	16.3729	0.000759489	0.000759489	1.08202	0.113722	2.73138	1.44963	1.63855	0.712423		4	200	A161	T G G K A P R K Q L A T K	H3 11-23
201	162	74785	79470	83516	79257	4369.4	16.2743	0.000317398	0.000501301	81540	81397	88068	83668.3	3810.89	16.3524	0.000704262	0.000704262	1.05566	0.0781433	2.21886	1.14982	1.40487	0.490437		4	201	A162	T G G Kme A P R K Q L A T K	H3 11-23	H3K14me1
202	163	81729	81903	83675	82435.7	1076.81	16.331	0.000469639	0.000647548	82288	81612	84515	82805	1518.99	16.3374	0.000664541	0.000664541	1.00448	0.00644921	1.415	0.500807	1.02624	0.0373704		4	202	A163	T G G Kme2 A P R K Q L A T K	H3 11-23	H3K14me2
203	164	91213	93485	75357	86685	9875.89	16.4035	0.000673159	0.000843057	94056	101315	71029	88800	15812.3	16.4383	0.000940366	0.000940366	1.0244	0.0347773	1.39694	0.482275	1.11542	0.157593		4	203	A164	T G G Kme3 A P R K Q L A T K	H3 11-23	H3K14me3
204	165	165338	130930	130065	142111	20119.8	17.1167	0.00332777	0.00339316	176125	173074	152415	167205	12898.8	17.3513	0.0045477	0.0045477	1.17658	0.234597	1.36659	0.450583	1.34025	0.422507		4	204	A165	T G G Kac A P R K Q L A T K	H3 11-23	H3K14ac
205	166	74971	76638	78911	76840	1977.75	16.2296	0.000201636	0.000390096	84078	81507	82572	82719	1291.79	16.3359	0.000660584	0.000660584	1.07651	0.106361	3.27612	1.71199	1.69339	0.759912		4	205	A166	T G G K A P Rme K Q L A T K	H3 11-23	H3R17me1
206	167	81135	82340	83250	82241.7	1060.92	16.3276	0.000460347	0.000638623	79742	82229	84274	82081.7	2269.59	16.3248	0.000631261	0.000631261	0.998055	-0.00280948	1.37127	0.455514	0.988473	-0.0167267		4	206	A167	T G G K A P Rme2a K Q L A T K	H3 11-23	H3R17me2a
207	168	84144	85138	88141	85807.7	2080.95	16.3888	0.000631139	0.000802691	83079	87416	88924	86473	3034.46	16.4	0.000833303	0.000833303	1.00775	0.0111432	1.32031	0.400882	1.03814	0.0539955		4	207	A168	T G G K A P Rme2s K Q L A T K	H3 11-23	H3R17me2s
208	169	72684	73226	71980	72630	624.753	16.1483	0	0.000196398	70523	70487	71803	70937.7	749.617	16.1143	0.000118535	0.000118535	0.976699	-0.0340137	#DIV/0!	#DIV/0!	0.603545	-0.728466		4	208	A169	T G G K A P Rcit K Q L A T K	H3 11-23	H3R17cit
209	170	76019	74727	75447	75397.7	647.411	16.2022	0.000132556	0.000323736	90505	76942	76388	81278.3	7995.33	16.3106	0.0005943	0.0005943	1.078	0.108351	4.48338	2.16459	1.83576	0.876375		4	209	A170	T G G K A P R Kme Q L A T K	H3 11-23	H3K18me1
210	171	74973	76652	81298	77641	3276.43	16.2445	0.00024	0.00042695	77275	76827	82040	78714	2889.1	16.2643	0.000476318	0.000476318	1.01382	0.0198016	1.98466	0.988889	1.11563	0.157858		4	210	A171	T G G K A P R Kme2 Q L A T K	H3 11-23	H3K18me2
211	172	87432	155284	88392	110369	38900.2	16.752	0.00180751	0.00193275	87395	91265	94100	90920	3365.79	16.4723	0.00103791	0.00103791	0.82378	-0.27967	0.574218	-0.80033	0.537009	-0.896982		4	211	A172	T G G K A P R Kme3 Q L A T K	H3 11-23	H3K18me3
212	173	263762	106445	124828	165012	86012.8	17.3322	0.00442459	0.0044468	317728	148656	149916	205433	97252.1	17.6483	0.00630657	0.00630657	1.24496	0.316102	1.42535	0.511313	1.41823	0.504087		4	212	A173	T G G K A P R Kac Q L A T K	H3 11-23	H3K18ac
213	174	77197	76441	108925	87521	18540.3	16.4173	0.000713199	0.00088152	73886	75527	75190	74867.7	866.686	16.1921	0.000299351	0.000299351	0.855425	-0.225286	0.41973	-1.25247	0.339585	-1.55816		4	213	A174	T G G K A P R K Q L A T K	H3 11-23
214	175	75476	79702	80556	78578	2720.13	16.2618	0.000284877	0.00047006	77695	79014	76417	77708.7	1298.55	16.2458	0.000430063	0.000430063	0.988937	-0.0160499	1.50964	0.594208	0.91491	-0.128298		4	214	A175	T G G K A P R K Q L A T K	H3 11-23
215	176	78664	82790	85681	82378.3	3526.57	16.33	0.000466893	0.00064491	76757	77195	81378	78443.3	2550.91	16.2594	0.000463864	0.000463864	0.952233	-0.0706141	0.993514	-0.00938827	0.719269	-0.475396		4	215	A176	T G G Kme A P Rme K Q L A T K	H3 11-23	H3K14me1	H3R17me1
216	177	128784	118193	134996	127324	8496.07	16.9581	0.00261956	0.00271284	150652	119812	82333	117599	34213.2	16.8435	0.00226538	0.00226538	0.923618	-0.114632	0.864794	-0.209572	0.83506	-0.260048		4	216	A177	T G G Kme A P Rme2a K Q L A T K	H3 11-23	H3K14me1	H3R17me2a
217	178	79348	80035	79218	79533.7	439.006	16.2793	0.000330649	0.00051403	185371	81009	81186	115855	60202.4	16.822	0.00218516	0.00218516	1.45668	0.542687	6.60871	2.72437	4.25104	2.08781		4	217	A178	T G G Kme A P Rme2s K Q L A T K	H3 11-23	H3K14me1	H3R17me2s
218	179	79708	78238	79746	79230.7	859.884	16.2738	0.000316136	0.000500089	79365	81609	86742	82572	3781.61	16.3334	0.000653821	0.000653821	1.04217	0.0595937	2.06816	1.04835	1.30741	0.386711		4	218	A179	T G G Kme A P Rcit K Q L A T K	H3 11-23	H3K14me1	H3R17cit
219	180	87712	92729	102386	94275.7	7458.26	16.5246	0.00103671	0.0011923	98054	97542	100350	98648.7	1495.47	16.59	0.00139349	0.00139349	1.04639	0.0654141	1.34415	0.426694	1.16875	0.224964		4	219	A180	T G G Kme2 A P Rme K Q L A T K	H3 11-23	H3K14me2	H3R17me1
220	181	108628	112077	110519	110408	1727.18	16.7525	0.00180936	0.00193453	119685	146319	132905	132970	13317.1	17.0207	0.00297258	0.00297258	1.20435	0.268252	1.64288	0.716231	1.53659	0.619729		4	220	A181	T G G Kme2 A P Rme2a K Q L A T K	H3 11-23	H3K14me2	H3R17me2a
221	182	76123	73947	74800	74956.7	1096.43	16.1938	0.000111435	0.000303446	71017	75536	74749	73767.3	2414.14	16.1707	0.000248726	0.000248726	0.984133	-0.0230747	2.23203	1.15835	0.81967	-0.286884		4	221	A182	T G G Kme2 A P Rme2s K Q L A T K	H3 11-23	H3K14me2	H3R17me2s
222	183	75748	75595	76961	76101.3	748.413	16.2156	0.000166258	0.000356111	72016	73328	75436	73593.3	1725.37	16.1673	0.00024072	0.00024072	0.967044	-0.0483466	1.44787	0.53393	0.675969	-0.564971		4	222	A183	T G G Kme2 A P Rcit K Q L A T K	H3 11-23	H3K14me2	H3R17cit
223	BLANK-4	76191	76884	78952	77342.3	1436.43	16.239	0.000225695	0.000413208	76488	76177	78835	77166.7	1453.16	16.2357	0.000405126	0.000405126	0.997729	-0.0032805	1.79501	0.843993	0.98044	-0.0284985		4	223			BLANK-4
224	926	559212	687854	855066	700711	148345	19.4185	0.0300817	0.0290939	641982	836051	1005201	827745	181752	19.6588	0.0349386	0.0349386	1.18129	0.240367	1.16146	0.215936	1.20089	0.264107		4	224	926	10% Kac G Kac G Kac G Kac G Kac G Kac G Kac	POSCTRL-4
225	184	84926	85823	87145	85964.7	1116.26	16.3915	0.000638659	0.000809915	92501	93724	94745	93656.7	1123.51	16.5151	0.00116382	0.00116382	1.08948	0.123638	1.82228	0.865747	1.43696	0.523023		5	225	A184	T G G Kme3 A P Rme K Q L A T K	H3 11-23	H3K14me3	H3R17me1
226	185	124025	138975	126490	129830	8015.13	16.9863	0.00273957	0.00282812	134282	125302	136234	131939	5830.37	17.0095	0.00292517	0.00292517	1.01625	0.0232509	1.06775	0.0945698	1.03432	0.0486764		5	226	A185	T G G Kme3 A P Rme2a K Q L A T K	H3 11-23	H3K14me3	H3R17me2a
227	186	90126	91443	90850	90806.3	659.585	16.4705	0.000870549	0.00103268	97016	98219	103896	99710.3	3674.46	16.6055	0.00144234	0.00144234	1.09805	0.13495	1.65682	0.728416	1.3967	0.482025		5	227	A186	T G G Kme3 A P Rme2s K Q L A T K	H3 11-23	H3K14me3	H3R17me2s
228	187	100548	103920	102360	102276	1687.57	16.6421	0.00141988	0.00156039	106526	102385	100301	103071	3168.64	16.6533	0.00159695	0.00159695	1.00777	0.0111662	1.1247	0.169544	1.02343	0.0334143		5	228	A187	T G G Kme3 A P Rcit K Q L A T K	H3 11-23	H3K14me3	H3R17cit
229	188	402198	365545	267353	345032	69723.6	18.3964	0.0130466	0.0127294	565494	498618	567881	543998	39318.1	19.0532	0.0218836	0.0218836	1.57666	0.65687	1.67734	0.746179	1.71914	0.781689		5	229	A188	T G G Kac A P Rme K Q L A T K	H3 11-23	H3K14ac	H3R17me1
230	189	560307	570425	552113	560948	9172.83	19.0975	0.0233878	0.0226635	763615	778647	727863	756708	26087	19.5294	0.0316703	0.0316703	1.34898	0.431869	1.35413	0.437371	1.39741	0.482757		5	230	A189	T G G Kac A P Rme2a K Q L A T K	H3 11-23	H3K14ac	H3R17me2a
231	190	322088	315259	317917	318421	3442.32	18.2806	0.0117721	0.0115051	437512	376484	443515	419170	37089.1	18.6772	0.0161404	0.0161404	1.3164	0.3966	1.37108	0.455309	1.4029	0.488411		5	231	A190	T G G Kac A P Rme2s K Q L A T K	H3 11-23	H3K14ac	H3R17me2s
232	191	789287	770590	846285	802054	39429.4	19.6133	0.0349355	0.0337566	1090674	1067414	985446	1.04784e+06	55276.1	19.999	0.0450652	0.0450652	1.30645	0.385654	1.28995	0.367321	1.335	0.416845		5	232	A191	T G G Kac A P Rcit K Q L A T K	H3 11-23	H3K14ac	H3R17cit
233	192	97943	107018	93350	99437	6955.4	16.6015	0.00128391	0.00142977	104071	103879	107965	105305	2305.63	16.6842	0.00169975	0.00169975	1.05901	0.0827193	1.32388	0.404775	1.18883	0.249542		5	233	A192	T G G Kme A P R Kme Q L A T K	H3 11-23	H3K14me1	H3K18me1
234	193	97086	107746	104639	103157	5482.35	16.6545	0.00146208	0.00160092	104969	106658	108298	106642	1664.56	16.7024	0.00176125	0.00176125	1.03378	0.0479295	1.20462	0.268575	1.10015	0.137696		5	234	193	T G G Kme A P R Kme2 Q L A T K	H3 11-23	H3K14me1	H3K18me2
235	194	100113	99887	100769	100256	458.137	16.6133	0.00132315	0.00146746	101736	104475	107157	104456	2710.55	16.6725	0.00166069	0.00166069	1.04189	0.059202	1.2551	0.327799	1.13167	0.178455		5	235	194	T G G Kme A P R Kme3 Q L A T K	H3 11-23	H3K14me1	H3K18me3
236	195	519856	543643	535748	533082	12115.5	19.024	0.0220532	0.0213814	615560	558886	546069	573505	36980.2	19.1294	0.0232412	0.0232412	1.07583	0.105448	1.05387	0.0756993	1.08698	0.120329		5	236	195	T G G Kme A P R Kac Q L A T K	H3 11-23	H3K14me1	H3K18ac
237	196	101234	98502	96123	98619.7	2557.53	16.5896	0.00124477	0.00139216	110253	108419	121634	113435	7159.22	16.7915	0.00207382	0.00207382	1.15023	0.201923	1.66603	0.736415	1.48964	0.574963		5	237	196	T G G Kme2 A P R Kme Q L A T K	H3 11-23	H3K14me2	H3K18me1
238	197	94006	93567	96890	94821	1805.2	16.5329	0.00106283	0.00121739	103644	99677	98563	100628	2670.66	16.6187	0.00148456	0.00148456	1.06124	0.0857533	1.3968	0.482127	1.21947	0.28625		5	238	197	T G G Kme2 A P R Kme2 Q L A T K	H3 11-23	H3K14me2	H3K18me2
239	198	94100	93094	92332	93175.3	886.802	16.5077	0.000984011	0.00114167	98354	97401	96802	97519	782.7	16.5734	0.00134152	0.00134152	1.04662	0.0657353	1.36332	0.447122	1.17505	0.232721		5	239	198	T G G Kme2 A P R Kme3 Q L A T K	H3 11-23	H3K14me2	H3K18me3
240	199	341087	327665	454197	374316	69503.4	18.5139	0.0144492	0.0140767	384454	457571	379251	407092	43793.4	18.635	0.0155847	0.0155847	1.08756	0.121097	1.07859	0.109147	1.10713	0.146819		5	240	199	T G G Kme2 A P R Kac Q L A T K	H3 11-23	H3K14me2	H3K18ac
241	200	106308	103640	98154	102701	4157.37	16.6481	0.00144022	0.00157992	118033	103092	97514	106213	10609.6	16.6966	0.00174152	0.00174152	1.0342	0.0485148	1.2092	0.274057	1.10228	0.140495		5	241	200	T G G Kme3 A P R Kme Q L A T K	H3 11-23	H3K14me3	H3K18me1
242	201	95862	89726	88112	91233.3	4088.97	16.4773	0.000891	0.00105232	100724	97874	97725	98774.3	1690.1	16.5918	0.00139928	0.00139928	1.08266	0.114575	1.57046	0.651184	1.3297	0.411106		5	242	201	T G G Kme3 A P R Kme2 Q L A T K	H3 11-23	H3K14me3	H3K18me2
243	202	88076	90587	93220	90627.7	2572.24	16.4677	0.000861992	0.00102446	93828	98957	98173	96986	2762.86	16.5655	0.001317	0.001317	1.07016	0.097825	1.52785	0.611506	1.28556	0.362395		5	243	202	T G G Kme3 A P R Kme3 Q L A T K	H3 11-23	H3K14me3	H3K18me3
244	203	161660	149396	150101	153719	6886.14	17.2299	0.00388373	0.00392724	166165	152672	165701	161513	7659.76	17.3013	0.00428582	0.00428582	1.0507	0.0713518	1.10353	0.142128	1.09131	0.126056		5	244	203	T G G Kme3 A P R Kac Q L A T K	H3 11-23	H3K14me3	H3K18ac
245	204	740324	855806	821097	805742	59252.4	19.62	0.0351121	0.0339263	815097	778911	784235	792748	19537.3	19.5965	0.0333284	0.0333284	0.983872	-0.0234568	0.949199	-0.0752176	0.982377	-0.0256509		5	245	204	T G G Kac A P R Kme Q L A T K	H3 11-23	H3K14ac	H3K18me1
246	205	1476675	1668961	1185262	1.44363e+06	243537	20.4613	0.0656637	0.0632751	1519451	1450418	1438173	1.46935e+06	43820.9	20.4867	0.0644582	0.0644582	1.01781	0.0254718	0.981642	-0.0267315	1.0187	0.0267263		5	246	205	T G G Kac A P R Kme2 Q L A T K	H3 11-23	H3K14ac	H3K18me2
247	206	929961	965114	926627	940567	21323.3	19.8432	0.0415695	0.0401295	988848	1044643	1034767	1.02275e+06	29774.6	19.964	0.0439107	0.0439107	1.08738	0.120854	1.05632	0.0790474	1.09423	0.129912		5	247	206	T G G Kac A P R Kme3 Q L A T K	H3 11-23	H3K14ac	H3K18me3
248	207	2984886	3074814	2874930	2978210	100109	21.506	0.139162	0.13388	4506473	3342536	3985449	3.94482e+06	583031	21.9115	0.178353	0.178353	1.32456	0.405514	1.28162	0.35797	1.33219	0.413795		5	248	207	T G G Kac A P R Kac Q L A T K	H3 11-23	H3K14ac	H3K18ac
249	208	135769	148896	153241	145969	9096.41	17.1553	0.00351253	0.00357065	165993	156479	156326	159599	5537.61	17.2841	0.00419778	0.00419778	1.09338	0.128796	1.19509	0.257118	1.17564	0.233442		5	249	208	T G G K A P Rme Kme Q L A T K	H3 11-23	H3R17me1	H3K18me1
250	209	115068	107835	104881	109261	5241.14	16.7374	0.00175444	0.00188177	116966	136710	111338	121671	13324.4	16.8926	0.00245275	0.00245275	1.11358	0.155206	1.39802	0.483385	1.30342	0.382305		5	250	209	T G G K A P Rme Kme2 Q L A T K	H3 11-23	H3R17me1	H3K18me2
251	210	101093	101422	102242	101586	591.727	16.6323	0.00138682	0.00152862	108305	105834	106431	106857	1289.32	16.7053	0.00177114	0.00177114	1.05189	0.0729801	1.27712	0.352895	1.15865	0.212443		5	251	210	T G G K A P Rme Kme3 Q L A T K	H3 11-23	H3R17me1	H3K18me3
252	211	306712	369035	328424	334724	31635.5	18.3526	0.0125529	0.0122551	302877	383545	376816	354413	44757.8	18.4351	0.013161	0.013161	1.05882	0.0824596	1.04844	0.0682489	1.07392	0.102884		5	252	211	T G G K A P Rme Kac Q L A T K	H3 11-23	H3R17me1	H3K18ac
253	212	144627	104879	103210	117572	23445.2	16.8432	0.00215248	0.00226414	148245	119040	107649	124978	20939.3	16.9313	0.00260489	0.00260489	1.06299	0.0881296	1.21018	0.27522	1.1505	0.202256		5	253	212	T G G K A P Rme2a Kme Q L A T K	H3 11-23	H3R17me2a	H3K18me1
254	213	91023	90966	90386	90791.7	352.472	16.4703	0.000869846	0.001032	96569	96828	97267	96888	352.847	16.564	0.00131249	0.00131249	1.06715	0.0937581	1.50887	0.593472	1.27179	0.34686		5	254	213	T G G K A P Rme2a Kme2 Q L A T K	H3 11-23	H3R17me2a	H3K18me2
255	214	93006	89976	90216	91066	1684.37	16.4746	0.000882985	0.00104462	93447	91962	95894	93767.7	1985.52	16.5168	0.00116892	0.00116892	1.02967	0.042178	1.32383	0.40472	1.11899	0.162199		5	255	214	T G G K A P Rme2a Kme3 Q L A T K	H3 11-23	H3R17me2a	H3K18me3
256	215	121515	123733	114222	119823	4976.05	16.8705	0.00226031	0.00236772	150073	466396	147520	254663	183371	17.9582	0.00857158	0.00857158	2.12532	1.08768	3.79222	1.92304	3.62018	1.85606		5	256	215	T G G K A P Rme2a Kac Q L A T K	H3 11-23	H3R17me2a	H3K18ac
257	216	97816	95049	90539	94468	3673.13	16.5275	0.00104592	0.00120115	104270	104286	94334	100963	5741.18	16.6235	0.00149999	0.00149999	1.06876	0.0959338	1.43413	0.520177	1.2488	0.320542		5	257	216	T G G K A P Rme2s Kme Q L A T K	H3 11-23	H3R17me2s	H3K18me1
258	217	87667	87048	88573	87762.7	766.988	16.4213	0.000724773	0.000892639	94224	93101	90504	92609.7	1908.05	16.4989	0.00111565	0.00111565	1.05523	0.0775554	1.5393	0.622277	1.24983	0.32173		5	258	217	T G G K A P Rme2s Kme2 Q L A T K	H3 11-23	H3R17me2s	H3K18me2
259	218	88241	88690	87973	88301.3	362.288	16.4301	0.000750573	0.000917423	92931	88608	93167	91568.7	2566.73	16.4826	0.00106775	0.00106775	1.037	0.0524188	1.42258	0.50851	1.16386	0.218915		5	259	218	T G G K A P Rme2s Kme3 Q L A T K	H3 11-23	H3R17me2s	H3K18me3
260	219	159837	152877	146945	153220	6452.83	17.2252	0.00385981	0.00390426	146797	163359	164300	158152	9844.97	17.271	0.00413119	0.00413119	1.03219	0.0457103	1.07031	0.098028	1.05812	0.0815091		5	260	219	T G G K A P Rme2s Kac Q L A T K	H3 11-23	H3R17me2s	H3K18ac
261	220	116956	118741	113493	116397	2668.34	16.8287	0.00209619	0.00221007	121007	122722	122055	121928	864.525	16.8957	0.00246456	0.00246456	1.04752	0.0669797	1.17573	0.23356	1.11515	0.15724		5	261	220	T G G K A P Rcit Kme Q L A T K	H3 11-23	H3R17cit	H3K18me1
262	221	95444	94829	101552	97275	3716.73	16.5698	0.00118036	0.00133029	104664	99200	97157	100340	3881.24	16.6145	0.00147133	0.00147133	1.03151	0.0447607	1.2465	0.317887	1.10602	0.145373		5	262	221	T G G K A P Rcit Kme2 Q L A T K	H3 11-23	H3R17cit	H3K18me2
263	222	95657	89733	89130	91506.7	3606.92	16.4816	0.000904091	0.0010649	98290	95130	90156	94525.3	4100.57	16.5284	0.00120378	0.00120378	1.03299	0.0468242	1.33149	0.413036	1.13042	0.176862		5	263	222	T G G K A P Rcit Kme3 Q L A T K	H3 11-23	H3R17cit	H3K18me3
264	223	1308112	1123593	1251695	1227800	94551.8	20.2276	0.0553264	0.0533448	1288791	1266695	1212266	1.25592e+06	39384.5	20.2603	0.0546385	0.0546385	1.0229	0.0326659	0.987565	-0.0180523	1.02425	0.034569		5	264	223	T G G K A P Rcit Kac Q L A T K	H3 11-23	H3R17cit	H3K18ac
265	224	88540	85222	85740	86500.7	1785	16.4004	0.00066433	0.000834576	89241	93122	93948	92103.7	2513.31	16.491	0.00109236	0.00109236	1.06477	0.0905473	1.64431	0.717482	1.30889	0.38834		5	265	224	L A T K A A R K S A P A T	H3 20-32
266	225	103348	101658	97910	100972	2783.15	16.6236	0.00135743	0.00150039	111187	110322	106155	109221	2690.51	16.7369	0.00187993	0.00187993	1.0817	0.113299	1.38492	0.469805	1.25296	0.325345		5	266	225	L A Tph K A A R K S A P A T	H3 20-32	H3T22ph
267	226	96157	96938	99242	97445.7	1603.93	16.5723	0.00118854	0.00133815	101009	97938	99138	99361.7	1547.67	16.6004	0.0014263	0.0014263	1.01966	0.0280913	1.20005	0.26309	1.06588	0.0920415		5	267	226	L A T Kme A A R K S A P A T	H3 20-32	H3K23me1
268	227	94968	97225	101157	97783.3	3132.05	16.5773	0.00120471	0.00135368	94818	116821	115429	109023	12321.3	16.7343	0.00187079	0.00187079	1.11494	0.156968	1.5529	0.634965	1.382	0.466762		5	268	227	L A T Kme2 A A R K S A P A T	H3 20-32	H3K23me2
269	228	89317	88217	89364	88966	649.079	16.441	0.000782407	0.000948004	93029	92810	92748	92862.3	147.629	16.5028	0.00112727	0.00112727	1.0438	0.0618394	1.44077	0.526843	1.1891	0.24987		5	269	228	L A T Kme3 A A R K S A P A T	H3 20-32	H3K23me3
270	229	111656	112369	113944	112656	1170.75	16.7816	0.00191705	0.00203798	120957	124396	118259	121204	3075.95	16.8871	0.00243125	0.00243125	1.07587	0.105509	1.26823	0.342811	1.19297	0.254559		5	270	229	L A T Kac A A R K S A P A T	H3 20-32	H3K23ac
271	230	90994	90471	91000	90821.7	303.701	16.4707	0.000871283	0.00103338	90456	95146	90119	91907	2810.11	16.4879	0.00108332	0.00108332	1.01195	0.0171382	1.24336	0.314241	1.04832	0.0680822		5	271	230	L A T K A A Rme K S A P A T	H3 20-32	H3R26me1
272	231	89663	91154	89262	90026.3	996.958	16.4581	0.000833191	0.000996789	90515	91527	92150	91397.3	825.177	16.4799	0.00105987	0.00105987	1.01523	0.021805	1.27206	0.347164	1.06328	0.088524		5	272	231	L A T K A A Rme2a K S A P A T	H3 20-32	H3R26me2a
273	232	86403	88776	88835	88004.7	1387.4	16.4253	0.000736364	0.000903773	94723	89541	91569	91944.3	2611.31	16.4885	0.00108503	0.00108503	1.04477	0.0631806	1.4735	0.559249	1.20056	0.263707		5	273	232	L A T K A A Rme2s K S A P A T	H3 20-32	H3R26me2s
274	233	96169	100239	95503	97303.7	2563.79	16.5702	0.00118174	0.00133161	101986	99982	98205	100058	1891.64	16.6105	0.00145832	0.00145832	1.0283	0.0402656	1.23405	0.303401	1.09515	0.131135		5	274	233	L A T K A A Rcit K S A P A T	H3 20-32	H3R26cit
275	234	105308	95605	94135	98349.3	6071.04	16.5856	0.00123182	0.00137972	97579	96765	95460	96601.3	1068.94	16.5598	0.0012993	0.0012993	0.982227	-0.0258722	1.05478	0.0769442	0.94171	-0.0866452		5	275	234	L A T K A A R Kme S A P A T	H3 20-32	H3K27me1
276	235	87548	87739	88445	87910.7	472.498	16.4238	0.000731862	0.000899449	87479	86318	86007	86601.3	775.825	16.4021	0.000839207	0.000839207	0.985106	-0.021649	1.14667	0.197456	0.933024	-0.100014		5	276	235	L A T K A A R Kme2 S A P A T	H3 20-32	H3K27me2
277	236	97632	97917	97972	97840.3	182.506	16.5781	0.00120744	0.0013563	109253	100620	100664	103512	4971.61	16.6594	0.00161727	0.00161727	1.05797	0.0813014	1.33942	0.421608	1.19241	0.253878		5	277	236	L A T K A A R Kme3 S A P A T	H3 20-32	H3K27me3
278	237	167901	160537	155181	161206	6386.36	17.2985	0.00424233	0.00427172	178623	187736	191668	186009	6691.78	17.505	0.00541287	0.00541287	1.15386	0.206464	1.27592	0.351537	1.26714	0.341577		5	278	237	L A T K A A R Kac S A P A T	H3 20-32	H3K27ac
279	BLANK-5	95536	96311	91281	94376	2708.21	16.5261	0.00104152	0.00119691	92254	102731	89730	94905	6894.01	16.5342	0.00122125	0.00122125	1.00561	0.00806407	1.17257	0.229675	1.02033	0.0290425		5	279			BLANK-5
280	481	186949	166113	215575	189546	24833	17.5322	0.00559963	0.00557559	159565	165273	178058	167632	9469.5	17.3549	0.00456736	0.00456736	0.884388	-0.177248	0.815654	-0.293972	0.819171	-0.287764		5	280	481	5% S G Rme G K G G K G L G K G	NEGCTRL-5
281	238	99126	95437	93673	96078.7	2782.55	16.5519	0.00112307	0.00127525	92710	91185	94368	92754.3	1591.96	16.5011	0.0011223	0.0011223	0.9654	-0.0508014	0.99932	-0.000981334	0.880063	-0.184321		6	281	238	L A T K A A R K Sph A P A T	H3 20-32	H3S28ph
282	239	97960	94750	98534	97081.3	2039.29	16.5669	0.00117109	0.00132138	98077	96271	96073	96807	1104.3	16.5628	0.00130876	0.00130876	0.997174	-0.00408255	1.11756	0.160353	0.990448	-0.0138469		6	282	239	L A Tph Kme A A R K S A P A T	H3 20-32	H3T22ph	H3K23me1
283	240	86251	87251	87243	86915	575.055	16.4073	0.000684175	0.000853639	87188	85265	85592	86015	1028.92	16.3923	0.00081223	0.00081223	0.989645	-0.0150169	1.18717	0.247524	0.951492	-0.0717365		6	283	240	L A Tph Kme2 A A R K S A P A T	H3 20-32	H3T22ph	H3K23me2
284	241	87680	86852	85734	86755.3	976.595	16.4047	0.000676528	0.000846293	83361	81305	79952	81539.3	1716.54	16.3152	0.000606309	0.000606309	0.939877	-0.0894563	0.896207	-0.158096	0.716429	-0.481104		6	284	241	L A Tph Kme3 A A R K S A P A T	H3 20-32	H3T22ph	H3K23me3
285	242	779168	842824	701996	774663	70522	19.5632	0.0336236	0.0324963	642076	729169	648901	673382	48433.3	19.3611	0.0278365	0.0278365	0.869258	-0.202143	0.827886	-0.272496	0.856604	-0.223299		6	285	242	L A Tph Kac A A R K S A P A T	H3 20-32	H3T22ph	H3K23ac
286	243	92656	93344	93120	93040	350.907	16.5056	0.000977529	0.00113544	110240	100217	93319	101259	8508.46	16.6277	0.00151358	0.00151358	1.08833	0.122122	1.54837	0.630752	1.33303	0.414706		6	286	243	L A T K A A Rme Kme S A P A T	H3 20-32	H3R26me1	H3K27me1
287	244	96985	86647	86103	89911.7	6131.72	16.4562	0.000827699	0.000991513	88703	84472	82086	85087	3351.1	16.3767	0.000769534	0.000769534	0.94634	-0.0795696	0.929727	-0.105121	0.776121	-0.365646		6	287	244	L A T K A A Rme Kme2 S A P A T	H3 20-32	H3R26me1	H3K27me2
288	245	93372	92709	93853	93311.3	574.408	16.5098	0.000990525	0.00114793	92634	90811	88815	90753.3	1910.15	16.4697	0.00103024	0.00103024	0.972586	-0.0401017	1.04009	0.0567115	0.897475	-0.156056		6	288	245	L A T K A A Rme Kme3 S A P A T	H3 20-32	H3R26me1	H3K27me3
289	246	836036	1175228	1769470	1.26024e+06	472489	20.2653	0.0568804	0.0548376	1308551	1555407	1889968	1584642	291809	20.5957	0.0697628	0.0697628	1.25741	0.330453	1.22648	0.294527	1.27217	0.347294		6	289	246	L A T K A A Rme Kac S A P A T	H3 20-32	H3R26me1	H3K27ac
290	247	99130	95186	94259	96191.7	2586.54	16.5536	0.00112848	0.00128045	672931	165882	96474	311762	314701	18.2501	0.0111987	0.0111987	3.24105	1.69646	9.92371	3.31088	8.74589	3.12861		6	290	247	L A T K A A Rme2a Kme S A P A T	H3 20-32	H3R26me2a	H3K27me1
291	248	90833	87512	84658	87667.7	3090.44	16.4198	0.000720224	0.000888268	83545	83483	83424	83484	60.5062	16.3492	0.000695781	0.000695781	0.952278	-0.0705451	0.966063	-0.0498108	0.783301	-0.352362		6	291	248	L A T K A A Rme2a Kme2 S A P A T	H3 20-32	H3R26me2a	H3K27me2
292	249	90844	83207	81525	85192	4966.5	16.3784	0.000601652	0.000774365	81070	81245	77407	79907.3	2167.12	16.286	0.000531222	0.000531222	0.937968	-0.0923901	0.882938	-0.179616	0.68601	-0.543699		6	292	249	L A T K A A Rme2a Kme3 S A P A T	H3 20-32	H3R26me2a	H3K27me3
293	250	243885	261047	254999	253310	8704.73	17.9505	0.00865362	0.00850935	264144	260870	251586	258867	6514.28	17.9818	0.00876499	0.00876499	1.02193	0.0313033	1.01287	0.0184493	1.03004	0.0427039		6	293	250	L A T K A A Rme2a Kac S A P A T	H3 20-32	H3R26me2a	H3K27ac
294	251	100013	91306	92814	94711	4653.16	16.5312	0.00105756	0.00121233	116051	131170	98506	115242	16347	16.8143	0.00215696	0.00215696	1.21678	0.283067	2.03956	1.02826	1.77919	0.831219		6	294	251	L A T K A A Rme2s Kme S A P A T	H3 20-32	H3R26me2s	H3K27me1
295	252	86847	88006	87979	87610.7	661.493	16.4188	0.000717494	0.000885646	82363	77458	77849	79223.3	2726.05	16.2736	0.000499752	0.000499752	0.904266	-0.145181	0.696524	-0.521755	0.564279	-0.825519		6	295	252	L A T K A A Rme2s Kme2 S A P A T	H3 20-32	H3R26me2s	H3K27me2
296	253	85160	85721	83407	84762.7	1207.09	16.3711	0.00058109	0.000754612	80072	83772	81360	81734.7	1878.24	16.3187	0.000615296	0.000615296	0.964277	-0.0524809	1.05887	0.0825198	0.815381	-0.294454		6	296	253	L A T K A A Rme2s Kme3 S A P A T	H3 20-32	H3R26me2s	H3K27me3
297	254	223994	234558	255262	237938	15905.7	17.8602	0.00791737	0.00780208	254014	253228	259584	255609	3465.1	17.9636	0.00861509	0.00861509	1.07427	0.103351	1.08813	0.121846	1.1042	0.143008		6	297	254	L A T K A A Rme2s Kac S A P A T	H3 20-32	H3R26me2s	H3K27ac
298	255	87573	91523	91700	90265.3	2333.31	16.4619	0.000844638	0.00100778	344268	97726	92189	178061	143966	17.442	0.00504719	0.00504719	1.97264	0.980128	5.97557	2.57908	5.0082	2.32429		6	298	255	L A T K A A Rcit Kme S A P A T	H3 20-32	H3R26cit	H3K27me1
299	256	92643	91283	87590	90505.3	2614.72	16.4657	0.000856133	0.00101883	86911	84942	82168	84673.7	2382.86	16.3696	0.000750517	0.000750517	0.935565	-0.0960894	0.876636	-0.18995	0.736648	-0.440953		6	299	256	L A T K A A Rcit Kme2 S A P A T	H3 20-32	H3R26cit	H3K27me2
300	257	99673	89973	94171	94605.7	4864.59	16.5296	0.00105252	0.00120748	86050	85039	90404	87164.3	2850.81	16.4115	0.00086511	0.00086511	0.921344	-0.118189	0.821945	-0.282887	0.716459	-0.481043		6	300	257	L A T K A A Rcit Kme3 S A P A T	H3 20-32	H3R26cit	H3K27me3
301	258	4586880	4601238	5228215	4.80544e+06	366201	22.1962	0.226676	0.217949	4249914	4300761	5023233	4524636	432545	22.1094	0.205029	0.205029	0.941565	-0.0868681	0.904503	-0.144803	0.940721	-0.0881608		6	301	258	L A T K A A Rcit Kac S A P A T	H3 20-32	H3R26cit	H3K27ac
302	259	104110	101675	102225	102670	1277.04	16.6477	0.00143875	0.00157851	94562	95846	103633	98013.7	4908.65	16.5807	0.00136428	0.00136428	0.954648	-0.0669599	0.948236	-0.0766818	0.864281	-0.210427		6	302	259	L A T Kme A A R Kme S A P A T	H3 20-32	H3K23me1	H3K27me1
303	260	92191	93917	95305	93804.3	1560.05	16.5174	0.00101414	0.00117061	89196	89240	87274	88570	1122.58	16.4345	0.000929784	0.000929784	0.944199	-0.0828365	0.916823	-0.125285	0.794272	-0.332295		6	303	260	L A T Kme A A R Kme2 S A P A T	H3 20-32	H3K23me1	H3K27me2
304	261	96525	111356	98768	102216	7994.24	16.6413	0.00141703	0.00155764	89871	88732	91192	89931.7	1231.12	16.4565	0.000992433	0.000992433	0.879817	-0.184725	0.700363	-0.513825	0.637139	-0.65032		6	304	261	L A T Kme A A R Kme3 S A P A T	H3 20-32	H3K23me1	H3K27me3
305	262	928029	1588871	726868	1081256	450967	20.0443	0.0483078	0.0466024	751008	919146	870598	846917	86534.3	19.6919	0.0358207	0.0358207	0.783272	-0.352415	0.74151	-0.431461	0.768645	-0.379611		6	305	262	L A T Kme A A R Kac S A P A T	H3 20-32	H3K23me1	H3K27ac
306	263	94820	94448	92814	94027.3	1067.11	16.5208	0.00102482	0.00118087	86096	84161	86510	85589	1253.89	16.3851	0.000792631	0.000792631	0.910257	-0.135655	0.773436	-0.370646	0.671225	-0.575131		6	306	263	L A T Kme2 A A R Kme S A P A T	H3 20-32	H3K23me2	H3K27me1
307	264	102254	103086	103244	102861	531.866	16.6503	0.00144792	0.00158732	102103	105002	103426	103510	1451.34	16.6594	0.00161718	0.00161718	1.00631	0.00907404	1.1169	0.159496	1.01881	0.0268873		6	307	264	L A T Kme2 A A R Kme2 S A P A T	H3 20-32	H3K23me2	H3K27me2
308	265	91900	94098	108299	98099	8901.56	16.582	0.00121983	0.00136821	85797	83497	85249	84847.7	1201.37	16.3726	0.000758522	0.000758522	0.864919	-0.209363	0.621827	-0.685414	0.554392	-0.851021		6	308	265	L A T Kme2 A A R Kme3 S A P A T	H3 20-32	H3K23me2	H3K27me3
309	266	1480762	1424411	1506356	1.47051e+06	41923.5	20.4879	0.0669509	0.0645117	1616597	1538022	1544515	1566378	43611.9	20.579	0.0689225	0.0689225	1.06519	0.0911161	1.02945	0.0418709	1.06837	0.0954147		6	309	266	L A T Kme2 A A R Kac S A P A T	H3 20-32	H3K23me2	H3K27ac
310	267	100429	97941	94913	97761	2762.4	16.577	0.00120364	0.00135265	90283	90980	88547	89936.7	1252.93	16.4566	0.000992663	0.000992663	0.919965	-0.12035	0.824718	-0.278028	0.733863	-0.446417		6	310	267	L A T Kme3 A A R Kme S A P A T	H3 20-32	H3K23me3	H3K27me1
311	268	92018	97066	91116	93400	3206.72	16.5111	0.000994772	0.00115201	82769	89587	90564	87640	4246.6	16.4193	0.000886995	0.000886995	0.93833	-0.0918331	0.891657	-0.165439	0.769956	-0.377152		6	311	268	L A T Kme3 A A R Kme2 S A P A T	H3 20-32	H3K23me3	H3K27me2
312	269	97634	98963	102225	99607.3	2362.35	16.604	0.00129207	0.0014376	98869	91905	96055	95609.7	3503.29	16.5449	0.00125367	0.00125367	0.959866	-0.0590955	0.970283	-0.0435224	0.872058	-0.197504		6	312	269	L A T Kme3 A A R Kme3 S A P A T	H3 20-32	H3K23me3	H3K27me3
313	270	1156748	1235329	1209846	1200641	40091.1	20.1954	0.0540257	0.0520952	1894779	1219922	1156142	1.42361e+06	409285	20.4411	0.0623541	0.0623541	1.18571	0.245754	1.15416	0.206838	1.19692	0.259332		6	313	270	L A T Kme3 A A R Kac S A P A T	H3 20-32	H3K23me3	H3K27ac
314	271	188906	199499	188269	192225	6307.8	17.5524	0.00572794	0.00569885	190703	194274	195737	193571	2589.52	17.5625	0.00576081	0.00576081	1.00701	0.0100718	1.00574	0.00825409	1.01087	0.0156006		6	314	271	L A T Kac A A R Kme S A P A T	H3 20-32	H3K23ac	H3K27me1
315	272	679446	778412	615432	691097	82112.3	19.3985	0.0296212	0.0286515	753154	786060	766863	768692	16529.1	19.552	0.0322216	0.0322216	1.11228	0.153519	1.08779	0.121398	1.1246	0.169418		6	315	272	L A T Kac A A R Kme2 S A P A T	H3 20-32	H3K23ac	H3K27me2
316	273	207076	218406	207029	210837	6554.99	17.6858	0.00661937	0.00655519	226199	283115	291115	266810	35396.6	18.0255	0.00913044	0.00913044	1.26548	0.339683	1.37935	0.46399	1.39286	0.478048		6	316	273	L A T Kac A A R Kme3 S A P A T	H3 20-32	H3K23ac	H3K27me3
317	274	19487821	22080251	21287318	2.09518e+07	1.32838e+06	24.3206	1	0.960829	21670101	21912638	21826743	2.18032e+07	122976	24.378	1	1	1.04063	0.0574633	1	0	1.04077	0.0576477		6	317	274	L A T Kac A A R Kac S A P A T	H3 20-32	H3K23ac	H3K27ac
318	275	322567	267601	258006	282725	34836.4	18.109	0.0100624	0.00986268	267130	247264	240014	251469	14038.6	17.94	0.00842465	0.00842465	0.88945	-0.169015	0.83724	-0.256287	0.854195	-0.227363		6	318	275	L A T K A A R Kme Sph A P A T	H3 20-32	H3K27me1	H3S28ph
319	276	112427	109638	107348	109804	2543.58	16.7446	0.00178045	0.00190676	100159	97489	98062	98570	1405.62	16.5889	0.00138988	0.00138988	0.897688	-0.155714	0.780631	-0.357287	0.728921	-0.456166		6	319	276	L A T K A A R Kme2 Sph A P A T	H3 20-32	H3K27me2	H3S28ph
320	277	107556	119435	113082	113358	5944.3	16.7905	0.00195064	0.00207024	126223	124425	124097	124915	1144.57	16.9306	0.00260199	0.00260199	1.10195	0.140065	1.33392	0.415669	1.25685	0.329813		6	320	277	L A T K A A R Kme3 Sph A P A T	H3 20-32	H3K27me3	H3S28ph
321	278	5900750	6088077	6031728	6.00685e+06	96109.2	22.5182	0.284217	0.273225	6324833	6468998	6534675	6.44284e+06	107340	22.6193	0.293284	0.293284	1.07258	0.101087	1.0319	0.0453048	1.07342	0.10221		6	321	278	L A T K A A R Kac Sph A P A T	H3 20-32	H3K27ac	H3S28ph
322	279	133016	112988	135383	127129	12303.5	16.9559	0.00261021	0.00270385	117593	112351	102759	110901	7522.55	16.7589	0.00195721	0.00195721	0.87235	-0.197021	0.74983	-0.415364	0.723862	-0.466214		6	322	279	P A Tph G G V K K P H R Y R	H3 30-42	H3T32ph
323	280	99733	97311	97514	98186	1343.58	16.5832	0.001224	0.00137221	89787	86508	87486	87927	1683.4	16.424	0.0009002	0.0009002	0.895515	-0.159211	0.73546	-0.44328	0.656023	-0.608182		6	323	280	P A T G G V Kme K P H R Y R	H3 30-42	H3K36me1
324	281	98587	97248	99382	98405.7	1078.49	16.5865	0.00123452	0.00138231	93339	101579	97858	97592	4126.44	16.5745	0.00134488	0.00134488	0.991732	-0.0119785	1.0894	0.12353	0.972918	-0.0396102		6	324	281	P A T G G V Kme2 K P H R Y R	H3 30-42	H3K36me2
325	282	101590	103018	107512	104040	3090.45	16.6668	0.00150437	0.00164155	95148	109033	99574	101252	7092.9	16.6276	0.00151326	0.00151326	0.973199	-0.0391926	1.00591	0.00849704	0.921849	-0.117398		6	325	282	P A T G G V Kme3 K P H R Y R	H3 30-42	H3K36me3
326	283	136423	114400	111350	120724	13680.7	16.8814	0.00230346	0.00240918	111622	104519	105572	107238	3833.27	16.7105	0.00178867	0.00178867	0.888285	-0.170905	0.776513	-0.364917	0.742439	-0.429656		6	326	283	P A T G G V Kac K P H R Y R	H3 30-42	H3K36ac
327	284	2174711	2498497	2518095	2397101	192845	21.1929	0.11133	0.107143	2570608	2463192	2500903	2.51157e+06	54496.3	21.2602	0.11241	0.11241	1.04775	0.0672974	1.0097	0.0139306	1.04915	0.0692263		6	327	284	P A T G G V K Kme P H R Y R	H3 30-42	H3K37me1
328	285	105961	101484	103674	103706	2238.68	16.6621	0.00148839	0.00162619	94572	92857	101421	96283.3	4531.23	16.555	0.00128467	0.00128467	0.928423	-0.107146	0.863126	-0.212357	0.789984	-0.340104		6	328	285	P A T G G V K Kme2 P H R Y R	H3 30-42	H3K37me2
329	286	90757	90826	95220	92267.7	2557.03	16.4935	0.000940539	0.00109991	92055	89156	87655	89622	2236.71	16.4516	0.000978186	0.000978186	0.971326	-0.0419723	1.04003	0.0566207	0.889332	-0.169206		6	329	286	P A T G G V K Kme3 P H R Y R	H3 30-42	H3K37me3
330	287	103993	107618	98943	103518	4356.96	16.6595	0.00147937	0.00161753	97935	90446	94157	94179.3	3744.55	16.5231	0.00118786	0.00118786	0.909787	-0.136399	0.802953	-0.316612	0.73437	-0.445421		6	330	287	P A T G G V K Kac P H R Y R	H3 30-42	H3K37ac
331	288	115707	109110	104591	109803	5590.28	16.7446	0.00178037	0.00190668	113708	104846	103458	107337	5560.64	16.7118	0.00179325	0.00179325	0.977548	-0.0327611	1.00724	0.0104012	0.94051	-0.0884844		6	331	288	P A Tph G G V Kme K P H R Y R	H3 30-42	H3T32ph	H3K36me1
332	289	110643	94959	95979	100527	8775.55	16.6172	0.00133612	0.00147992	91882	89777	89893	90517.3	1183.26	16.4659	0.00101938	0.00101938	0.900428	-0.151317	0.762942	-0.390355	0.688809	-0.537824		6	332	289	P A Tph G G V Kme2 K P H R Y R	H3 30-42	H3T32ph	H3K36me2
333	290	105935	111967	111465	109789	3347.09	16.7444	0.00177972	0.00190605	104188	113066	117254	111503	6671.81	16.7667	0.0019849	0.0019849	1.01561	0.0223447	1.11529	0.157416	1.04137	0.0584762		6	333	290	P A Tph G G V Kme3 K P H R Y R	H3 30-42	H3T32ph	H3K36me3
334	291	392128	351419	362820	368789	21000.7	18.4924	0.0141844	0.0138224	376452	432828	384738	398006	30440	18.6024	0.0151667	0.0151667	1.07922	0.109995	1.06925	0.0965972	1.09725	0.133894		6	334	291	P A Tph G G V Kac K P H R Y R	H3 30-42	H3T32ph	H3K36ac
335	BLANK-6	98555	96932	101919	99135.3	2543.65	16.5971	0.00126946	0.00141589	86975	87761	84382	86372.7	1768.2	16.3983	0.000828686	0.000828686	0.87126	-0.198825	0.652785	-0.61532	0.585278	-0.772807		6	335			BLANK-6
336	NEGCTRL-6	123254	119781	119403	120813	2122.69	16.8824	0.00230769	0.00241324	115179	114423	108190	112597	3835.53	16.7808	0.00203526	0.00203526	0.931999	-0.101599	0.881947	-0.181236	0.843372	-0.245759		6	336	540	10% K R H Rcit Kme V L R D N I Q G	NEGCTRL-6
337	292	222927	243045	264012	243328	20544	17.8925	0.00817552	0.00805007	286808	309388	274565	290254	17665.4	18.147	0.0102091	0.0102091	1.19285	0.254412	1.24874	0.320471	1.2682	0.34278		7	337	292	P A T G G V K K P H R Y R	H3 30-42
338	293	87752	85414	95706	89624	5395.33	16.4516	0.000813921	0.000978278	91644	81074	80251	84323	6353.51	16.3636	0.000734383	0.000734383	0.940853	-0.0879589	0.902278	-0.148357	0.75069	-0.413711		7	338	293	P A T G G V Kme Kme P H R Y R	H3 30-42	H3K36me1	H3K37me1
339	294	83735	85499	94765	87999.7	5924.97	16.4252	0.000736125	0.000903543	82225	83225	90311	85253.7	4408.23	16.3795	0.000777202	0.000777202	0.968795	-0.0457362	1.0558	0.0783401	0.860171	-0.217304		7	339	294	P A T G G V Kme Kme2 P H R Y R	H3 30-42	H3K36me1	H3K37me2
340	295	90933	85273	89615	88607	2961.58	16.4351	0.000765213	0.000931486	82847	84205	85360	84137.3	1257.87	16.3605	0.000725841	0.000725841	0.949556	-0.0746746	0.948548	-0.0762077	0.779228	-0.359882		7	340	295	P A T G G V Kme Kme3 P H R Y R	H3 30-42	H3K36me1	H3K37me3
341	296	88870	73294	75178	79114	8501.29	16.2716	0.000310549	0.000494721	90090	72771	70991	77950.7	10550.6	16.2503	0.000441197	0.000441197	0.985295	-0.0213717	1.4207	0.506604	0.89181	-0.165192		7	341	296	P A T G G V Kme Kac P H R Y R	H3 30-42	H3K36me1	H3K37ac
342	297	92995	87593	94461	91683	3617.09	16.4844	0.000912536	0.00107301	127843	92458	88691	102997	21599.3	16.6522	0.00159357	0.00159357	1.12341	0.167881	1.74631	0.804312	1.48514	0.570601		7	342	297	P A T G G V Kme2 Kme P H R Y R	H3 30-42	H3K36me2	H3K37me1
343	298	104278	110679	125127	113361	10680.2	16.7906	0.00195081	0.00207041	102307	103650	98936	101631	2428.62	16.633	0.00153071	0.00153071	0.896523	-0.157588	0.784652	-0.349874	0.739326	-0.435718		7	343	298	P A T G G V Kme2 Kme2 P H R Y R	H3 30-42	H3K36me2	H3K37me2
344	299	84993	94037	93712	90914	5130.31	16.4722	0.000875705	0.00103763	80241	82555	81994	81596.7	1207.09	16.3162	0.000608947	0.000608947	0.897515	-0.155992	0.695378	-0.52413	0.586863	-0.768904		7	344	299	P A T G G V Kme2 Kme3 P H R Y R	H3 30-42	H3K36me2	H3K37me3
345	300	88369	92766	162798	114644	41760.2	16.8068	0.00201226	0.00212944	86626	87813	74373	82937.3	7440.64	16.3397	0.00067063	0.00067063	0.723432	-0.467071	0.333272	-1.58523	0.314932	-1.66689		7	345	300	P A T G G V Kme2 Kac P H R Y R	H3 30-42	H3K36me2	H3K37ac
346	301	158935	172895	176292	169374	9198.61	17.3699	0.00463352	0.00464751	205641	204368	168543	192851	21060.7	17.5571	0.00572765	0.00572765	1.13861	0.187272	1.23613	0.305835	1.23241	0.301486		7	346	301	P A T G G V Kme3 Kme P H R Y R	H3 30-42	H3K36me3	H3K37me1
347	302	78726	77499	77659	77961.3	667.035	16.2505	0.000255342	0.000441688	72953	74075	75299	74109	1173.37	16.1774	0.000264445	0.000264445	0.950587	-0.07311	1.03565	0.0505374	0.598715	-0.740058		7	347	302	P A T G G V Kme3 Kme2 P H R Y R	H3 30-42	H3K36me3	H3K37me2
348	303	80583	80583	86711	82625.7	3538	16.3343	0.000478739	0.00065629	79306	78206	75946	77819.3	1713.05	16.2478	0.000435155	0.000435155	0.94183	-0.0864614	0.908961	-0.13771	0.663052	-0.592805		7	348	303	P A T G G V Kme3 Kme3 P H R Y R	H3 30-42	H3K36me3	H3K37me3
349	304	92711	92026	91534	92090.3	591.131	16.4908	0.000932045	0.00109175	86878	88243	91859	88993.3	2573.88	16.4414	0.000949261	0.000949261	0.96637	-0.0493525	1.01847	0.0264046	0.869485	-0.201768		7	349	304	P A T G G V Kme3 Kac P H R Y R	H3 30-42	H3K36me3	H3K37ac
350	305	112502	119280	113392	115058	3683.34	16.812	0.00203207	0.00214847	116057	132855	111040	119984	11425.4	16.8725	0.00237512	0.00237512	1.04281	0.0604807	1.16881	0.225045	1.10549	0.144685		7	350	305	P A T G G V Kac Kme P H R Y R	H3 30-42	H3K36ac	H3K37me1
351	306	323589	316221	312528	317446	5631.33	18.2762	0.0117254	0.0114602	343938	357520	300015	333824	30057	18.3487	0.0122137	0.0122137	1.05159	0.0725779	1.04165	0.0588703	1.06575	0.0918746		7	351	306	P A T G G V Kac Kme2 P H R Y R	H3 30-42	H3K36ac	H3K37me2
352	307	94742	112933	113739	107138	10742.8	16.7091	0.00165275	0.00178408	92602	99996	107134	99910.7	7266.38	16.6084	0.00145156	0.00145156	0.932542	-0.10076	0.87827	-0.187264	0.813616	-0.297579		7	352	307	P A T G G V Kac Kme3 P H R Y R	H3 30-42	H3K36ac	H3K37me3
353	308	229223	181495	214881	208533	24489	17.6699	0.00650902	0.00644918	191508	231291	256669	226489	32844.8	17.7891	0.00727534	0.00727534	1.08611	0.119167	1.11773	0.160573	1.1281	0.173898		7	353	308	P A T G G V Kac Kac P H R Y R	H3 30-42	H3K36ac	H3K37ac
354	309	2315295	947322	1015091	1.4259e+06	770981	20.4434	0.0648145	0.0624593	2677433	1520655	1596672	1.93159e+06	647039	20.8814	0.0857254	0.0857254	1.35464	0.437911	1.32263	0.403407	1.3725	0.456806		7	354	309	K P H R Y R P G T V A L R	H3 37-49
355	310	93616	95437	96744	95265.7	1571.02	16.5397	0.00108413	0.00123785	99688	95048	94051	96262.3	3008.3	16.5547	0.0012837	0.0012837	1.01046	0.015015	1.18409	0.243776	1.03704	0.0524783		7	355	310	K P H Rme Y R P G T V A L R	H3 37-49	H3R40me1
356	311	93034	94767	90280	92693.7	2262.78	16.5002	0.000960942	0.00111951	87402	89453	92448	89767.7	2537.67	16.4539	0.000984888	0.000984888	0.968434	-0.0462749	1.02492	0.0355098	0.879748	-0.184837		7	356	311	K P H Rme2a Y R P G T V A L R	H3 37-49	H3R40me2a
357	312	86416	88325	91496	88745.7	2565.99	16.4374	0.000771854	0.000937866	81497	82920	87991	84136	3413.5	16.3604	0.000725779	0.000725779	0.948058	-0.0769534	0.940307	-0.088797	0.773862	-0.369851		7	357	312	K P H Rme2s Y R P G T V A L R	H3 37-49	H3R40me2s
358	313	88394	96949	73523	86288.7	11854.1	16.3969	0.000654177	0.000824822	84426	88801	75210	82812.3	6937.71	16.3376	0.000664878	0.000664878	0.959713	-0.0593254	1.01636	0.02341	0.806088	-0.310992		7	358	313	K P H Rcit Y R P G T V A L R	H3 37-49	H3R40cit
359	314	73941	76476	76324	75580.3	1421.74	16.2057	0.000141305	0.00033214	73511	74597	71999	73369	1304.81	16.1629	0.000230399	0.000230399	0.970742	-0.0428403	1.6305	0.705318	0.693679	-0.52766		7	359	314	K P H R Y Rme P G T V A L R	H3 37-49	H3R42me1
360	315	78376	80139	86076	81530.3	4034.15	16.315	0.000426278	0.000605895	73348	73185	73463	73332	139.689	16.1622	0.000228696	0.000228696	0.899444	-0.152894	0.536495	-0.898363	0.377452	-1.40563		7	360	315	K P H R Y R me2a P G T V A L R	H3 37-49	H3R42me2a
361	316	88180	133213	123522	114972	23702.8	16.8109	0.00202794	0.0021445	79069	77850	80083	79000.7	1118.07	16.2696	0.000489507	0.000489507	0.687132	-0.541342	0.241382	-2.05061	0.228261	-2.13124		7	361	316	K P H R Y Rme2s P G T V A L R	H3 37-49	H3R42me2s
362	317	98355	87591	85913	90619.7	6751.33	16.4675	0.000861608	0.00102409	80991	82858	82884	82244.3	1085.5	16.3276	0.000638745	0.000638745	0.907577	-0.139908	0.741341	-0.431792	0.623721	-0.681026		7	362	317	K P H R Y Rcit P G T V A L R	H3 37-49	H3R42cit
363	318	75178	74490	74454	74707.3	408.007	16.189	9.94931e-05	0.000291974	74565	78121	75618	76101.3	1826.61	16.2156	0.000356111	0.000356111	1.01866	0.0266719	3.57925	1.83966	1.21967	0.286486		7	363	318	K P H R Y R P G Tph V A L R	H3 37-49	H3T45ph
364	319	76012	77373	77215	76866.7	744.367	16.2301	0.000202914	0.000391323	72519	72622	73279	72806.7	412.282	16.1518	0.000204526	0.000204526	0.947181	-0.0782875	1.00795	0.0114193	0.522652	-0.936076		7	364	319	K P H Rme Y R meP G T V A L R	H3 37-49	H3R40me1	H3R42me1
365	320	86579	135080	138278	119979	28969.4	16.8724	0.00226776	0.00237489	72467	74983	73591	73680.3	1260.38	16.169	0.000244723	0.000244723	0.61411	-0.70343	0.107914	-3.21205	0.103046	-3.27864		7	365	320	K P H Rme Y Rme2a P G T V A L R	H3 37-49	H3R40me1	H3R42me2a
366	321	89881	88765	89399	89348.3	559.723	16.4472	0.000800718	0.000965594	78418	82927	85888	82411	3761.64	16.3305	0.000646413	0.000646413	0.922356	-0.116604	0.807292	-0.308838	0.669446	-0.57896		7	366	321	K P H Rme Y Rme2s P G T V A L R	H3 37-49	H3R40me1	H3R42me2s
367	322	191365	92623	112377	132122	52248.3	17.0115	0.00284933	0.00293356	188123	120499	115611	141411	40527.5	17.1095	0.00336095	0.00336095	1.07031	0.0980273	1.17956	0.238247	1.14569	0.196219		7	367	322	K P H Rme Y Rcit P G T V A L R	H3 37-49	H3R40me1	H3R42cit
368	323	78773	80145	81447	80121.7	1337.15	16.2899	0.000358811	0.000541083	80035	77704	76598	78112.3	1754.51	16.2533	0.000448635	0.000448635	0.974921	-0.0366421	1.25034	0.322321	0.829143	-0.270307		7	368	323	K P H Rme2a Y Rme P G T V A L R	H3 37-49	H3R40me2a	H3R42me1
369	324	81464	94089	147682	107745	35157.8	16.7173	0.00168182	0.00181201	77567	80189	80384	79380	1573.13	16.2765	0.00050696	0.00050696	0.73674	-0.440773	0.301435	-1.73008	0.279778	-1.83765		7	369	324	K P H Rme2a Y Rme2a P G T V A L R	H3 37-49	H3R40me2a	H3R42me2a
370	325	182314	91291	88056	120554	53510.5	16.8793	0.00229529	0.00240133	75750	77910	77317	76992.3	1116	16.2324	0.000397105	0.000397105	0.638656	-0.646889	0.173009	-2.53108	0.165369	-2.59624		7	370	325	K P H Rme2a Y Rme2s P G T V A L R	H3 37-49	H3R40me2a	H3R42me2s
371	326	78730	85804	74765	79766.3	5591.99	16.2835	0.000341792	0.000524735	80942	78655	70667	76754.7	5394.66	16.228	0.00038617	0.00038617	0.962244	-0.0555255	1.12984	0.176118	0.735935	-0.442351		7	371	326	K P H Rme2a Y Rcit P G T V A L R	H3 37-49	H3R40me2a	H3R42cit
372	327	75162	74872	74965	74999.7	148.075	16.1946	0.000113494	0.000305424	73876	73845	76839	74853.3	1719.71	16.1918	0.000298692	0.000298692	0.998049	-0.00281762	2.63178	1.39604	0.977956	-0.0321581		7	372	327	K P H Rme2s Y Rme P G T V A L R	H3 37-49	H3R40me2s	H3R42me1
373	328	84174	84332	86950	85152	1559.12	16.3778	0.000599737	0.000772525	80111	79864	78985	79653.3	591.823	16.2814	0.000519536	0.000519536	0.935425	-0.0963057	0.866273	-0.207107	0.672516	-0.572358		7	373	328	K P H Rme2s Y Rme2a P G T V A L R	H3 37-49	H3R40me2s	H3R42me2a
374	329	89083	668082	87077	281414	334866	18.1023	0.00999963	0.00980238	73705	77236	77636	76192.3	2163.36	16.2174	0.000360298	0.000360298	0.270748	-1.88498	0.0360311	-4.79461	0.0367562	-4.76587		7	374	329	K P H Rme2s Y Rme2s P G T V A L R	H3 37-49	H3R40me2s	H3R42me2s
375	330	79741	82045	85194	82326.7	2737.39	16.3291	0.000464418	0.000642533	75040	75968	79922	76976.7	2592.59	16.2321	0.000396384	0.000396384	0.935015	-0.0969386	0.853507	-0.228525	0.616909	-0.696871		7	375	330	K P H Rme2s Y Rcit P G T V A L R	H3 37-49	H3R40me2s	H3R42cit
376	331	73471	76350	73929	74583.3	1547.02	16.1866	9.35542e-05	0.000286269	73418	73340	72420	73059.3	555.051	16.1568	0.000216151	0.000216151	0.979566	-0.0297847	2.31044	1.20817	0.755063	-0.405332		7	376	331	K P H Rcit Y Rme P G T V A L R	H3 37-49	H3R40cit	H3R42me1
377	332	77383	76240	77663	77095.3	753.854	16.2344	0.000213865	0.000401844	82058	75110	75933	77700.3	3796.22	16.2456	0.00042968	0.00042968	1.00785	0.0112773	2.00911	1.00656	1.06927	0.0966255		7	377	332	K P H Rcit Y Rme2a P G T V A L R	H3 37-49	H3R40cit	H3R42me2a
378	333	79599	86195	139594	101796	32899.7	16.6353	0.00139689	0.0015383	75316	73224	75221	74587	1181.35	16.1866	0.000286438	0.000286438	0.732711	-0.448685	0.205053	-2.28593	0.186204	-2.42504		7	378	333	K P H Rcit Y Rme2s P G T V A L R	H3 37-49	H3R40cit	H3R42me2s
379	334	83449	85145	86304	84966	1435.89	16.3746	0.000590828	0.000763967	75283	75415	79421	76706.3	2351.9	16.2271	0.000383946	0.000383946	0.902789	-0.14754	0.649845	-0.621833	0.50257	-0.992605		7	379	334	K P H Rcit Y Rcit P G T V A L R	H3 37-49	H3R40cit	H3R42cit
380	335	87850	74682	77526	80019.3	6929.04	16.2881	0.000353909	0.000536375	84974	76000	74674	78549.3	5603.29	16.2613	0.000468741	0.000468741	0.981629	-0.0267496	1.32447	0.405412	0.873906	-0.194449		7	380	335	K P H R Y Rme P G Tph V A L R	H3 37-49	H3R42me1	H3T45ph
381	336	78726	77207	77394	77775.7	828.307	16.247	0.00024645	0.000433146	75523	76120	78144	76595.7	1373.72	16.225	0.000378855	0.000378855	0.984828	-0.0220561	1.53725	0.620351	0.874659	-0.193207		7	381	336	K P H R Y Rme2a P G Tph V A L R	H3 37-49	H3R42me2a	H3T45ph
382	337	108610	487198	97656	231155	221808	17.8185	0.00759248	0.00748999	75757	73459	74754	74656.7	1152.09	16.188	0.000289643	0.000289643	0.322973	-1.63052	0.0381487	-4.71222	0.0386707	-4.69262		7	382	337	K P H R Y Rme2s P G Tph V A L R	H3 37-49	H3R42me2s	H3T45ph
383	338	93474	82476	84886	86945.3	5780.97	16.4078	0.000685628	0.000855034	73663	74733	77217	75204.3	1823.28	16.1985	0.000314841	0.000314841	0.864961	-0.209293	0.459201	-1.1228	0.36822	-1.44136		7	383	338	K P H R Y Rcit P G Tph V A L R	H3 37-49	H3R42cit	H3T45ph
384	339	93174	94163	76661	87999.3	9831.73	16.4252	0.000736109	0.000903528	90611	93103	76912	86875.3	8718	16.4067	0.000851814	0.000851814	0.987227	-0.018546	1.15718	0.210619	0.942764	-0.0850314		7	384	339	T V A L R E I R R Y Q K S	H3 45-57
385	340	79302	79444	82581	80442.3	1853.5	16.2957	0.000374169	0.000555837	84643	83920	82097	83553.3	1312.01	16.3504	0.000698971	0.000698971	1.03867	0.0547425	1.86806	0.901544	1.25751	0.330572		7	385	340	T V A L Rme E I R R Y Q K S	H3 45-57	H3R49me1
386	341	78928	79650	78712	79096.7	491.22	16.2713	0.000309719	0.000493924	78022	78810	78284	78372	401.303	16.2581	0.000460582	0.000460582	0.990838	-0.0132786	1.4871	0.572501	0.932497	-0.100829		7	386	341	T V A L Rme2a E I R R Y Q K S	H3 45-57	H3R49me2a
387	342	98300	87609	85808	90572.3	6752.67	16.4668	0.000859341	0.00102191	79837	81995	84348	82060	2256.2	16.3244	0.000630264	0.000630264	0.906016	-0.142391	0.733427	-0.447275	0.616751	-0.697239		7	387	342	T V A L Rme2s E I R R Y Q K S	H3 45-57	H3R49me2s
388	343	89590	91274	91950	90938	1215.35	16.4726	0.000876855	0.00103873	85453	87433	90947	87944.3	2782.46	16.4243	0.000900998	0.000900998	0.96708	-0.0482927	1.02753	0.039185	0.8674	-0.205231		7	388	343	T V A L Rcit E I R R Y Q K S	H3 45-57	H3R49cit
389	344	82258	83498	81177	82311	1161.41	16.3288	0.000463668	0.000641813	81268	86321	83311	83633.3	2541.87	16.3518	0.000702652	0.000702652	1.01607	0.0229928	1.51542	0.599718	1.09479	0.130658		7	389	344	T V A L R E I Rme R Y Q K S	H3 45-57	H3R52me1
390	345	84292	82195	82518	83001.7	1129.07	16.3409	0.000496747	0.00067359	82084	80787	77902	80257.7	2140.66	16.2924	0.00054734	0.00054734	0.96694	-0.0485011	1.10185	0.139927	0.812573	-0.299431		7	390	345	T V A L R E I Rme2a R Y Q K S	H3 45-57	H3R52me2a
391	BLANK-7	76753	78982	87978	81237.7	5942.74	16.3099	0.000412261	0.000592429	72647	73039	77223	74303	2536.38	16.1811	0.000273371	0.000273371	0.914637	-0.128728	0.663102	-0.592697	0.461441	-1.11578		7	391	925	10% K G K G K G K G K G K G K	NEGCTRL-7
392	POSCTRL-7	983413	1433531	1716383	1.37778e+06	369652	20.3939	0.0625095	0.0602451	1036713	1589603	1531017	1.38578e+06	303715	20.4023	0.0606132	0.0606132	1.00581	0.00835481	0.969665	-0.0444421	1.00611	0.00878967		7	392	926	10% Kac G Kac G Kac G Kac G Kac G Kac G Kac	POSCTRL-7
393	346	109537	109272	109285	109365	149.387	16.7388	0.00175939	0.00188653	115357	117540	113352	115416	2094.63	16.8165	0.00216496	0.00216496	1.05533	0.0777007	1.23052	0.299263	1.14759	0.198607		8	393	346	T V A L R E I Rme2s R Y Q K S	H3 45-57	H3R52me2s
394	347	92225	93060	94824	93369.7	1326.88	16.5107	0.000993319	0.00115061	94109	92807	91072	92662.7	1523.64	16.4997	0.00111808	0.00111808	0.992428	-0.0109657	1.1256	0.1707	0.971729	-0.0413734		8	394	347	T V A L R E I Rcit R Y Q K S	H3 45-57	H3R52cit
395	348	97061	93808	95084	95317.7	1639.04	16.5405	0.00108662	0.00124024	92917	91846	90877	91880	1020.42	16.4875	0.00108207	0.00108207	0.963935	-0.0529928	0.995819	-0.00604461	0.872473	-0.196818		8	395	348	T V A L R E I R Rme Y Q K S	H3 45-57	H3R53me1
396	349	96113	97957	96865	96978.3	927.209	16.5654	0.00116615	0.00131664	93479	92117	92579	92725	692.638	16.5007	0.00112095	0.00112095	0.956141	-0.0647041	0.961238	-0.0570344	0.85137	-0.232141		8	396	349	T V A L R E I R Rme2a Y Q K S	H3 45-57	H3R53me2a
397	350	91287	89867	89436	90196.7	968.535	16.4608	0.000841349	0.00100463	88871	87952	91585	89469.3	1888.96	16.4491	0.000971161	0.000971161	0.991936	-0.0116809	1.15429	0.207007	0.96669	-0.0488747		8	397	350	T V A L R E I R Rme2s Y Q K S	H3 45-57	H3R53me2s
398	351	88860	89623	91279	89920.7	1236.67	16.4564	0.00082813	0.000991927	91547	92184	89090	90940.3	1633.78	16.4726	0.00103884	0.00103884	1.01134	0.0162676	1.25444	0.327045	1.0473	0.066669		8	398	351	T V A L R E I R Rcit Y Q K S	H3 45-57	H3R53cit
399	352	99342	100044	101493	100293	1096.91	16.6139	0.00132491	0.00146915	104437	92777	96080	97764.7	6009.78	16.577	0.00135282	0.00135282	0.974791	-0.0368359	1.02107	0.0300795	0.920821	-0.119008		8	399	352	T V A L Rme E I Rme R Y Q K S	H3 45-57	H3R49me1	H3R52me1
400	353	102640	101531	101370	101847	691.46	16.636	0.00139934	0.00154065	105928	100765	101708	102800	2749.37	16.6495	0.00158451	0.00158451	1.00936	0.0134415	1.13233	0.179293	1.02847	0.0404996		8	400	353	T V A L Rme E I Rme2a R Y Q K S	H3 45-57	H3R49me1	H3R52me2a
401	354	112074	107272	101602	106983	5241.99	16.707	0.00164531	0.00177694	105239	103524	103433	104065	1017.44	16.6671	0.00164271	0.00164271	0.972731	-0.0398875	0.998422	-0.00227903	0.924463	-0.113312		8	401	354	T V A L Rme E I Rme2s R Y Q K S	H3 45-57	H3R49me1	H3R52me2s
402	355	92973	93733	91713	92806.3	1020.26	16.5019	0.000966338	0.00112469	95109	93667	92226	93667.3	1441.5	16.5153	0.00116431	0.00116431	1.00928	0.0133227	1.20487	0.268873	1.03522	0.0499401		8	402	355	T V A L Rme E I Rcit R Y Q K S	H3 45-57	H3R49me1	H3R52cit
403	356	114535	119271	118451	117419	2531.05	16.8413	0.00214515	0.0022571	118023	115970	112504	115499	2789.48	16.8175	0.00216876	0.00216876	0.983648	-0.0237855	1.01101	0.0157932	0.960862	-0.0575983		8	403	356	T V A L Rme2a E I Rme R Y Q K S	H3 45-57	H3R49me2a	H3R52me1
404	357	105718	103225	106759	105234	1816.03	16.6832	0.00156156	0.00169648	103483	101536	103524	102848	1136.12	16.6501	0.00158669	0.00158669	0.977324	-0.0330918	1.01609	0.0230331	0.935282	-0.096527		8	404	357	T V A L Rme2a E I Rme2a R Y Q K S	H3 45-57	H3R49me2a	H3R52me2a
405	358	92782	99658	92917	95119	3931.47	16.5374	0.0010771	0.0012311	91399	90871	91737	91335.7	436.46	16.4789	0.00105703	0.00105703	0.960225	-0.0585552	0.981364	-0.0271392	0.858608	-0.219929		8	405	358	T V A L Rme2a E I Rme2s R Y Q K S	H3 45-57	H3R49me2a	H3R52me2s
406	359	96686	96953	96916	96851.7	144.659	16.5635	0.00116009	0.00131082	94313	98013	95040	95788.7	1960.33	16.5476	0.00126191	0.00126191	0.989024	-0.0159219	1.08777	0.121374	0.962689	-0.0548581		8	406	359	T V A L Rme2a E I Rcit R Y Q K S	H3 45-57	H3R49me2a	H3R52cit
407	360	101840	104527	100272	102213	2151.88	16.6412	0.00141687	0.00155749	99123	98058	98869	98683.3	556.247	16.5905	0.00139509	0.00139509	0.965468	-0.0507003	0.98463	-0.0223461	0.895731	-0.158862		8	407	360	T V A L Rme2s E I Rme R Y Q K S	H3 45-57	H3R49me2s	H3R52me1
408	361	158693	106406	98905	121335	32569.9	16.8886	0.00233269	0.00243726	93794	91633	95675	93700.7	2022.62	16.5158	0.00116584	0.00116584	0.77225	-0.372861	0.499784	-1.00062	0.478341	-1.06389		8	408	361	T V A L Rme2s E I Rme2a R Y Q K S	H3 45-57	H3R49me2s	H3R52me2a
409	362	96204	95538	105990	99244	5851.69	16.5987	0.00127467	0.00142089	88686	90043	89493	89407.3	682.544	16.4481	0.000968309	0.000968309	0.900884	-0.150587	0.759656	-0.396582	0.681483	-0.553251		8	409	362	T V A L Rme2s E I Rme2s R Y Q K S	H3 45-57	H3R49me2s	H3R52me2s
410	363	91005	89985	351806	177599	150869	17.4383	0.00502744	0.00502592	84940	85905	85583	85476	491.318	16.3832	0.000787432	0.000787432	0.481287	-1.05503	0.156627	-2.6746	0.156674	-2.67416		8	410	363	T V A L Rme2s E I Rcit R Y Q K S	H3 45-57	H3R49me2s	H3R52cit
411	364	100526	101477	100254	100752	642.147	16.6205	0.00134691	0.00149028	99446	98156	143023	113542	25539.7	16.7929	0.00207871	0.00207871	1.12694	0.172409	1.54332	0.626036	1.39484	0.480102		8	411	364	T V A L Rcit E I Rme R Y Q K S	H3 45-57	H3R49cit	H3R52me1
412	365	97411	98654	95592	97219	1540	16.569	0.00117768	0.00132772	93733	94592	93798	94041	478.285	16.521	0.0011815	0.0011815	0.967311	-0.0479484	1.00324	0.00467077	0.889873	-0.168328		8	412	365	T V A L Rcit E I Rme2a R Y Q K S	H3 45-57	H3R49cit	H3R52me2a
413	366	86970	86943	87129	87014	100.504	16.409	0.000688916	0.000858194	83348	82997	82878	83074.3	244.357	16.3421	0.000676933	0.000676933	0.954724	-0.0668447	0.982605	-0.0253161	0.788788	-0.34229		8	413	366	T V A L Rcit E I Rme2s R Y Q K S	H3 45-57	H3R49cit	H3R52me2s
414	367	105675	102963	98566	102401	3587.63	16.6439	0.00142589	0.00156615	97293	95784	93970	95682.3	1663.83	16.546	0.00125702	0.00125702	0.934386	-0.09791	0.881568	-0.181856	0.802615	-0.317221		8	414	367	T V A L Rcit E I Rcit R Y Q K S	H3 45-57	H3R49cit	H3R52cit
415	368	103446	100818	102310	102191	1318.01	16.6409	0.00141583	0.00155649	97558	98578	97207	97781	712.185	16.5773	0.00135357	0.00135357	0.956842	-0.0636468	0.956029	-0.0648731	0.869632	-0.201522		8	415	368	T V A L R E I Rme Rme Y Q K S	H3 45-57	H3R52me1	H3R53me1
416	369	108138	111387	111701	110409	1972.71	16.7525	0.0018094	0.00193456	107763	108204	104819	106929	1840.28	16.7063	0.00177445	0.00177445	0.968481	-0.0462047	0.980687	-0.028135	0.917236	-0.124635		8	416	369	T V A L R E I Rme Rme2a Y Q K S	H3 45-57	H3R52me1	H3R53me2a
417	370	117028	115139	118635	116934	1749.89	16.8353	0.00212192	0.00223479	114838	113112	115451	114467	1212.83	16.8046	0.00212128	0.00212128	0.978903	-0.0307627	0.999698	-0.000435525	0.94921	-0.0752006		8	417	370	T V A L R E I Rme Rme2s Y Q K S	H3 45-57	H3R52me1	H3R53me2s
418	371	95830	99605	95905	97113.3	2158.17	16.5674	0.00117262	0.00132286	90555	89221	88479	89418.3	1051.97	16.4483	0.000968815	0.000968815	0.920763	-0.119099	0.826197	-0.275443	0.732366	-0.449362		8	418	371	T V A L R E I Rme Rcit Y Q K S	H3 45-57	H3R52me1	H3R53cit
419	372	96088	93401	94567	94685.3	1347.4	16.5309	0.00105633	0.00121115	93173	92626	90351	92050	1496.58	16.4901	0.0010899	0.0010899	0.972167	-0.0407232	1.03177	0.0451268	0.899889	-0.152182		8	419	372	T V A L R E I Rme2a Rme Y Q K S	H3 45-57	H3R52me2a	H3R53me1
420	373	106908	107320	104094	106107	1755.72	16.6952	0.00160338	0.00173666	103977	104433	102296	103569	1125.5	16.6602	0.00161986	0.00161986	0.976075	-0.0349368	1.01028	0.0147487	0.932743	-0.100448		8	420	373	T V A L R E I Rme2a Rme2a Y Q K S	H3 45-57	H3R52me2a	H3R53me2a
421	374	101456	102844	101876	102059	711.801	16.639	0.00140948	0.00155039	96886	97154	97617	97219	369.809	16.569	0.00132772	0.00132772	0.95258	-0.0700885	0.941994	-0.0862102	0.856378	-0.22368		8	421	374	T V A L R E I Rme2a Rme2s Y Q K S	H3 45-57	H3R52me2a	H3R53me2s
422	375	101919	100051	102814	101595	1409.76	16.6325	0.00138725	0.00152904	97329	95810	99516	97551.7	1863.01	16.5739	0.00134302	0.00134302	0.960205	-0.0585862	0.968117	-0.046746	0.878345	-0.18714		8	422	375	T V A L R E I Rme2a Rcit Y Q K S	H3 45-57	H3R52me2a	H3R53cit
423	376	95209	91121	88703	91677.7	3288.53	16.4843	0.000912281	0.00107277	86934	86881	87319	87044.7	239.053	16.4095	0.000859605	0.000859605	0.949464	-0.0748144	0.942259	-0.0858051	0.801298	-0.319589		8	423	376	T V A L R E I Rme2s Rme Y Q K S	H3 45-57	H3R52me2s	H3R53me1
424	377	98748	99200	96092	98013.3	1679.2	16.5807	0.00121573	0.00136426	98223	95742	93805	95923.3	2214.57	16.5496	0.0012681	0.0012681	0.978676	-0.0310962	1.04308	0.0608564	0.929516	-0.105449		8	424	377	T V A L R E I Rme2s Rme2a Y Q K S	H3 45-57	H3R52me2s	H3R53me2a
425	378	94246	95788	161918	117317	38633	16.8401	0.00214028	0.00225242	90981	90618	90211	90603.3	385.209	16.4673	0.00102334	0.00102334	0.772293	-0.37278	0.478131	-1.06452	0.454326	-1.1382		8	425	378	T V A L R E I Rme2s Rme2s Y Q K S	H3 45-57	H3R52me2s	H3R53me2s
426	379	92706	95762	92663	93710.3	1776.93	16.5159	0.00100963	0.00116629	86374	88432	88990	87932	1377.81	16.4241	0.00090043	0.00090043	0.938338	-0.0918199	0.891837	-0.165147	0.772049	-0.373236		8	426	379	T V A L R E I Rme2s Rcit Y Q K S	H3 45-57	H3R52me2s	H3R53cit
427	380	95761	96373	91087	94407	2891.44	16.5266	0.001043	0.00119834	90848	91681	87719	90082.7	2088.94	16.459	0.00099938	0.00099938	0.954195	-0.0676443	0.958177	-0.0616352	0.833971	-0.261931		8	427	380	T V A L R E I Rcit Rme Y Q K S	H3 45-57	H3R52cit	H3R53me1
428	381	96400	94782	103809	98330.3	4813.14	16.5853	0.00123091	0.00137885	93376	91142	92193	92237	1117.65	16.4931	0.0010985	0.0010985	0.938032	-0.0922909	0.89243	-0.164189	0.796679	-0.32793		8	428	381	T V A L R E I Rcit Rme2a Y Q K S	H3 45-57	H3R52cit	H3R53me2a
429	382	104760	106011	101275	104015	2454.25	16.6664	0.00150319	0.00164041	97764	106321	102097	102061	4278.62	16.6391	0.00155048	0.00155048	0.981208	-0.0273692	1.03146	0.0446869	0.945177	-0.0813439		8	429	382	T V A L R E I Rcit Rme2s Y Q K S	H3 45-57	H3R52cit	H3R53me2s
430	383	108225	95838	99697	101253	6338.46	16.6276	0.0013709	0.00151333	91321	91869	94773	92654.3	1855.17	16.4996	0.0011177	0.0011177	0.915074	-0.128039	0.815302	-0.294594	0.738569	-0.437196		8	430	383	T V A L R E I Rcit Rcit Y Q K S	H3 45-57	H3R52cit	H3R53cit
431	384	103559	112681	104134	106791	5108.7	16.7044	0.00163614	0.00176813	104306	88272	96579	96385.7	8018.75	16.5565	0.00128938	0.00128938	0.902561	-0.147904	0.788058	-0.343627	0.729231	-0.455553		8	431	384	E I R R Y Q K S T E L L I	H3 50-62
432	385	95765	102884	93598	97415.7	4858.08	16.5719	0.0011871	0.00133677	91531	91824	89780	91045	1105.27	16.4743	0.00104366	0.00104366	0.934603	-0.097574	0.879165	-0.185795	0.780733	-0.357099		8	432	385	E I R R Y Q Kme S T E L L I	H3 50-62	H3K56me1
433	386	92691	87592	88542	89608.3	2711.6	16.4513	0.000813171	0.000977557	83904	84493	84039	84145.3	308.562	16.3606	0.000726209	0.000726209	0.939035	-0.0907496	0.893058	-0.163175	0.742881	-0.428796		8	433	386	E I R R Y Q Kme2 S T E L L I	H3 50-62	H3K56me2
434	387	96481	97296	101124	98300.3	2479.09	16.5849	0.00122947	0.00137747	94888	94545	94417	94616.7	243.541	16.5298	0.00120799	0.00120799	0.962526	-0.055102	0.982525	-0.0254342	0.876961	-0.189416		8	434	387	E I R R Y Q Kme3 S T E L L I	H3 50-62	H3K56me3
435	388	199181	224347	230581	218036	16624	17.7342	0.00696418	0.00688642	199326	201693	209630	203550	5397.08	17.635	0.0062199	0.0062199	0.933558	-0.0991877	0.893127	-0.163062	0.903213	-0.146863		8	435	388	E I R R Y Q Kac S T E L L I	H3 50-62	H3K56ac
436	389	159068	94574	91832	115158	38051.9	16.8133	0.00203686	0.00215308	86746	90302	88508	88518.7	1778.02	16.4337	0.000927422	0.000927422	0.768671	-0.379561	0.455319	-1.13505	0.430743	-1.2151		8	436	389	E I R R Y Q K Sph T E L L I	H3 50-62	H3S57ph
437	390	95306	99815	106898	100673	5843.44	16.6193	0.00134311	0.00148663	96523	94177	91661	94120.3	2431.5	16.5222	0.00118515	0.00118515	0.934911	-0.0970985	0.882393	-0.180507	0.797204	-0.326979		8	437	390	E I R R Y Q K S Tph E L L I	H3 50-62	H3T58ph	H3S57ph
438	391	92836	93966	94785	93862.3	978.627	16.5183	0.00101691	0.00117328	86270	85443	88836	86849.7	1769.22	16.4062	0.000850633	0.000850633	0.925288	-0.112026	0.836484	-0.25759	0.725004	-0.463939		8	438	391	E I R R Y Q Kme Sph T E L L I	H3 50-62	H3K56me1	H3S57ph
439	392	93163	98324	97821	96436	2845.64	16.5573	0.00114018	0.00129169	84433	88726	84669	85942.7	2413.32	16.3911	0.000808902	0.000808902	0.891189	-0.166197	0.709452	-0.495223	0.626235	-0.675224		8	439	392	E I R R Y Q Kme2 Sph T E L L I	H3 50-62	H3K56me2	H3S57ph
440	393	98323	100211	88973	95835.7	6017.75	16.5483	0.00111143	0.00126407	82407	82711	83556	82891.3	595.349	16.3389	0.000668513	0.000668513	0.864932	-0.209341	0.601491	-0.733385	0.528857	-0.91905		8	440	393	E I R R Y Q Kme3 Sph T E L L I	H3 50-62	H3K56me3	H3S57ph
441	394	225533	222064	235257	227618	6839.17	17.7963	0.00742309	0.00732727	250296	253431	247321	250349	3055.35	17.9336	0.00837312	0.00837312	1.09987	0.137328	1.12798	0.173744	1.14273	0.19249		8	441	394	E I R R Y Q Kac Sph T E L L I	H3 50-62	H3K56ac	H3T58ph
442	395	104207	99976	101996	102060	2116.22	16.6391	0.00140952	0.00155043	97682	96855	93913	96150	1980.94	16.553	0.00127853	0.00127853	0.942096	-0.0860541	0.907068	-0.140717	0.82463	-0.278181		8	442	395	E I R R Y Q Kme Sph T E L L I	H3 50-62	H3K56me1	H3T58ph
443	396	96652	98271	99257	98060	1315.26	16.5814	0.00121796	0.00136641	89470	85474	87137	87360.3	2007.34	16.4147	0.000874128	0.000874128	0.890887	-0.166686	0.717698	-0.478551	0.639726	-0.644475		8	443	396	E I R R Y Q Kme2 S Tph E L L I	H3 50-62	H3K56me2	H3T58ph
444	397	99860	102621	102638	101706	1598.99	16.634	0.0013926	0.00153418	84078	86941	84035	85018	1665.51	16.3755	0.000766359	0.000766359	0.835916	-0.258569	0.550308	-0.861688	0.499525	-1.00137		8	444	397	E I R R Y Q Kme3 S Tph E L L I	H3 50-62	H3K56me3	H3T58ph
445	398	183505	230118	200276	204633	23610	17.6427	0.00632224	0.00626975	226135	150926	171780	182947	38828.1	17.4811	0.00527199	0.00527199	0.894025	-0.161613	0.833881	-0.262087	0.840862	-0.250059		8	445	398	E I R R Y Q Kac S Tph E L L I	H3 50-62	H3K56ac
446	399	154295	153898	155651	154615	919.18	17.2383	0.00392663	0.00396844	151612	184324	156114	164017	17730.1	17.3235	0.00440102	0.00440102	1.06081	0.0851652	1.12082	0.164549	1.109	0.149265		8	446	399	S T E L L I R K L P F Q R	H3 57-69
447	BLANK-8	93452	93677	92424	93184.3	668.009	16.5078	0.000984442	0.00114209	82642	86442	83159	84081	2060.96	16.3595	0.000723249	0.000723249	0.902308	-0.148308	0.734679	-0.444815	0.63327	-0.659107		8	447			BLANK-8
448	481	187756	193681	195792	192410	4166.12	17.5538	0.0057368	0.00570736	195050	208558	182767	195458	12900.3	17.5765	0.00584763	0.00584763	1.01584	0.0226798	1.01932	0.0276043	1.02458	0.0350276		8	448	481	5% S G Rme G K G G K G L G K G	NEGCTRL-8
449	400	159828	165212	175174	166738	7785.98	17.3472	0.00450727	0.00452623	172014	181570	170092	174559	6147.57	17.4134	0.00488605	0.00488605	1.0469	0.0661291	1.08404	0.116416	1.0795	0.110359		9	449	400	S T E L L I Rme K L P F Q R	H3 57-69	H3R63me1
450	401	97714	103349	107234	102766	4786.73	16.649	0.00144334	0.00158291	97547	97503	95242	96764	1318.27	16.5622	0.00130678	0.00130678	0.941599	-0.086816	0.90539	-0.143388	0.825555	-0.276564		9	450	401	S T E L L I Rme2a K L P F Q R	H3 57-69	H3R63me2a
451	402	96525	100518	99568	98870.3	2085.92	16.5933	0.00125677	0.00140369	90338	93028	90842	91402.7	1429.96	16.4799	0.00106011	0.00106011	0.92447	-0.113301	0.843521	-0.245504	0.755231	-0.405011		9	451	402	S T E L L I Rme2s K L P F Q R	H3 57-69	H3R63me2s
452	403	94669	94014	87515	92066	3954.86	16.4904	0.00093088	0.00109063	85472	83709	79016	82732.3	3336.97	16.3362	0.000661198	0.000661198	0.89862	-0.154217	0.710293	-0.493514	0.606252	-0.722011		9	452	403	S T E L L I Rcit K L P F Q R	H3 57-69	H3R63cit
453	404	113172	124015	121308	119498	5643.48	16.8666	0.00224474	0.00235277	110079	119361	119943	116461	5534.63	16.8295	0.00221303	0.00221303	0.974583	-0.0371436	0.985871	-0.0205292	0.940604	-0.0883406		9	453	404	S T E L L I R Kme L P F Q R	H3 57-69	H3K64me1
454	405	92273	93881	92524	92892.7	865.074	16.5033	0.000970473	0.00112867	86943	87634	87561	87379.3	379.634	16.415	0.000875002	0.000875002	0.940648	-0.0882726	0.901625	-0.149401	0.775253	-0.36726		9	454	405	S T E L L I R Kme2 L P F Q R	H3 57-69	H3K64me2
455	406	116744	115841	131910	121498	9028.06	16.8906	0.00234053	0.00244479	101672	101848	101885	101802	113.808	16.6354	0.00153856	0.00153856	0.837885	-0.255175	0.657356	-0.605253	0.629323	-0.668128		9	455	406	S T E L L I R Kme3 L P F Q R	H3 57-69	H3K64me3
456	407	536018	582321	554323	557554	23320	19.0888	0.0232253	0.0225073	509951	514002	510937	511630	2112.54	18.9647	0.0203944	0.0203944	0.917633	-0.124011	0.878114	-0.18752	0.906123	-0.142221		9	456	407	S T E L L I R Kac L P F Q R	H3 57-69	H3K64ac
457	408	127124	123708	124629	125154	1767.4	16.9333	0.0025156	0.00261297	121997	119568	128922	123496	4853.74	16.9141	0.00253668	0.00253668	0.986752	-0.0192401	1.00838	0.0120407	0.970806	-0.0427452		9	457	408	S T E L L I Rme Kme L P F Q R	H3 57-69	H3R63me1	H3K64me1
458	409	97088	98036	101833	98985.7	2511.01	16.5949	0.00126229	0.001409	89279	93427	91415	91373.7	2074.31	16.4795	0.00105878	0.00105878	0.9231	-0.115441	0.838772	-0.253649	0.751439	-0.412271		9	458	409	S T E L L I Rme Kme2 L P F Q R	H3 57-69	H3R63me1	H3K64me2
459	410	103397	105415	113143	107318	5144.23	16.7115	0.00166138	0.00179238	93460	99256	91694	94803.3	3955.93	16.5327	0.00121657	0.00121657	0.883384	-0.178887	0.732265	-0.449562	0.678748	-0.559051		9	459	410	S T E L L I Rme Kme3 L P F Q R	H3 57-69	H3R63me1	H3K64me3
460	411	419921	754938	358488	511116	213379	18.9633	0.0210011	0.0203708	383637	377768	346599	369335	19907.1	18.4946	0.0138475	0.0138475	0.722605	-0.468721	0.659371	-0.600837	0.679775	-0.556871		9	460	411	S T E L L I Rme Kac L P F Q R	H3 57-69	H3R63me1	H3K64ac
461	412	157636	168157	157522	161105	6107.48	17.2976	0.00423748	0.00426706	159272	154796	151219	155096	4034.85	17.2428	0.00399057	0.00399057	0.962699	-0.0548429	0.941733	-0.0866093	0.935205	-0.0966456		9	461	412	S T E L L I Rme2a Kme L P F Q R	H3 57-69	H3R63me2a	H3K64me1
462	413	114770	117150	123648	118523	4595.42	16.8548	0.00219801	0.00230788	111624	110988	112483	111698	750.267	16.7692	0.0019939	0.0019939	0.942422	-0.0855553	0.907137	-0.140607	0.863952	-0.210976		9	462	413	S T E L L I Rme2a Kme2 L P F Q R	H3 57-69	H3R63me2a	H3K64me2
463	414	104430	105103	109988	106507	3033.36	16.7006	0.00162253	0.00175505	100006	105012	99415	101478	3075.05	16.6308	0.00152365	0.00152365	0.952779	-0.069786	0.939063	-0.0907058	0.868155	-0.203976		9	463	414	S T E L L I Rme2a Kme3 L P F Q R	H3 57-69	H3R63me2a	H3K64me3
464	415	400854	425683	416278	414272	12535.5	18.6602	0.0163628	0.015915	403873	400612	418831	407772	9715.18	18.6374	0.015616	0.015616	0.984311	-0.0228144	0.95436	-0.0673947	0.98121	-0.0273662		9	464	415	S T E L L I Rme2a Kac L P F Q R	H3 57-69	H3R63me2a	H3K64ac
465	416	109817	103965	107465	107082	2944.71	16.7084	0.00165008	0.00178152	107123	96496	94492	99370.3	6788.36	16.6005	0.0014267	0.0014267	0.927981	-0.107833	0.864623	-0.209857	0.800832	-0.320429		9	465	416	S T E L L I Rme2s Kme L P F Q R	H3 57-69	H3R63me2s	H3K64me1
466	417	103167	101810	109309	104762	3995.84	16.6768	0.00153895	0.00167476	93286	99319	99547	97384	3550.8	16.5714	0.00133531	0.00133531	0.929574	-0.105359	0.867675	-0.204773	0.797311	-0.326785		9	466	417	S T E L L I Rme2s Kme2 L P F Q R	H3 57-69	H3R63me2s	H3K64me2
467	418	105284	102422	102445	103384	1645.78	16.6576	0.00147294	0.00161135	91119	93101	95164	93128	2022.64	16.5069	0.00113949	0.00113949	0.9008	-0.150721	0.773621	-0.370301	0.707168	-0.499875		9	467	418	S T E L L I Rme2s Kme3 L P F Q R	H3 57-69	H3R63me2s	H3K64me3
468	419	350863	424377	450404	408548	51623.8	18.6401	0.0160887	0.0156517	372559	412651	445865	410358	36706.7	18.6465	0.015735	0.015735	1.00443	0.00637866	0.978017	-0.0320681	1.00532	0.00765707		9	468	419	S T E L L I Rme2s Kac L P F Q R	H3 57-69	H3R63me2s	H3K64ac
469	420	109459	106177	103898	106511	2795.53	16.7006	0.00162273	0.00175525	564828	101673	93671	253391	269742	17.951	0.00851305	0.00851305	2.379	1.25036	5.24611	2.39125	4.85005	2.278		9	469	420	S T E L L I Rcit Kme L P F Q R	H3 57-69	H3R63cit	H3K64me1
470	421	96536	100958	97938	98477.3	2259.8	16.5875	0.00123795	0.00138561	81924	84681	102451	89685.3	11141	16.4526	0.000981099	0.000981099	0.910721	-0.13492	0.79252	-0.33548	0.708062	-0.498052		9	470	421	S T E L L I Rcit Kme2 L P F Q R	H3 57-69	H3R63cit	H3K64me2
471	422	105940	109018	111653	108870	2859.36	16.7323	0.00173572	0.00186379	98779	100959	97955	99231	1552.17	16.5985	0.00142029	0.00142029	0.91146	-0.133748	0.818271	-0.289349	0.762045	-0.392053		9	471	422	S T E L L I Rcit Kme3 L P F Q R	H3 57-69	H3R63cit	H3K64me3
472	423	7666436	8644255	8440853	8.25051e+06	515950	22.9761	0.391677	0.376454	7302648	6869184	7079850	7083894	216760	22.7561	0.322779	0.322779	0.8586	-0.219941	0.824095	-0.279118	0.857419	-0.221928		9	472	423	S T E L L I Rcit Kac L P F Q R	H3 57-69	H3R63cit	H3K64ac
473	424	152504	149457	141414	147792	5729.49	17.1732	0.00359984	0.00365452	514009	154800	149722	272844	208871	18.0577	0.00940806	0.00940806	1.84614	0.88451	2.61347	1.38596	2.57436	1.36421		9	473	424	E I A Q D F K T D L R F Q	H3 73-85
474	425	115631	109051	108439	111040	3987.39	16.7607	0.00183965	0.00196363	96574	93355	92564	94164.3	2123.98	16.5229	0.00118717	0.00118717	0.848019	-0.237831	0.645327	-0.631898	0.604583	-0.725988		9	474	425	E I A Q D F K T D L R F Q	H3 73-85	H3K79me1
475	426	196338	181654	175713	184568	10616.9	17.4938	0.00536125	0.00534659	186129	164480	177453	176021	10895.3	17.4254	0.00495332	0.00495332	0.953688	-0.0684102	0.923912	-0.114173	0.926444	-0.110224		9	475	426	E I A Q D F Kme T D L R F Q	H3 73-85	H3K79me2
476	427	116899	126279	143203	128794	13331.1	16.9747	0.00268994	0.00278044	100083	103948	113716	105916	7026.27	16.6926	0.00172784	0.00172784	0.822367	-0.282146	0.642336	-0.6386	0.621428	-0.686341		9	476	427	E I A Q D F Kme2 T D L R F Q	H3 73-85	H3K79me3
477	428	16051308	14981806	15455982	1.54964e+07	535893	23.8854	0.738714	0.70983	13956314	14295215	14884273	1.43786e+07	469566	23.7774	0.658402	0.658402	0.927869	-0.108007	0.891281	-0.166047	0.92755	-0.108504		9	477	428	E I A Q D F Kme3 T D L R F Q	H3 73-85	H3K79ac
478	429	327774	309274	297260	311436	15371.5	18.2486	0.0114375	0.0111837	297992	278899	296718	291203	10674.6	18.1517	0.0102528	0.0102528	0.935033	-0.0969105	0.896414	-0.157763	0.916762	-0.125381		9	478	429	E I A Q D F Kac T D L R F Q	H3 73-85	H3T80ph	H3T80ph
479	430	175803	167075	183580	175486	8257.07	17.421	0.00492625	0.00492872	168451	189483	185920	181285	11256.2	17.4679	0.00519551	0.00519551	1.03304	0.046901	1.05466	0.076775	1.05413	0.0760529		9	479	430	E I A Q D F K Tph D L R F Q	H3 73-85	H3K79me1	H3T80ph
480	431	157373	168385	167428	164395	6100.31	17.3268	0.00439507	0.00441844	139361	140167	137521	139016	1356.25	17.0849	0.00325078	0.00325078	0.845622	-0.241915	0.739642	-0.4351	0.735729	-0.442754		9	480	431	E I A Q D F Kme Tph D L R F Q	H3 73-85	H3K79me2	H3T80ph
481	432	157022	192195	188511	179243	19331.6	17.4516	0.00510617	0.00510156	103990	108241	109615	107282	2932.56	16.711	0.00179071	0.00179071	0.598529	-0.740506	0.350695	-1.51171	0.351012	-1.51041		9	481	432	E I A Q D F Kme2 Tph D L R F Q	H3 73-85	H3K79me3	H3T80ph
482	433	3863376	4106089	4036062	4.00184e+06	124923	21.9322	0.188188	0.180976	4106652	4037471	4601914	4248679	307860	22.0186	0.192333	0.192333	1.06168	0.08635	1.02202	0.0314298	1.06275	0.087806		9	482	433	E I A Q D F Kme3 Tph D L R F Q	H3 73-85	H3K79ac
483	434	158002	156970	166388	160453	5165.41	17.2918	0.00420627	0.00423708	158113	147338	150538	151996	5533.55	17.2137	0.00384798	0.00384798	0.947293	-0.0781172	0.91482	-0.12844	0.908168	-0.138969		9	483	434	I H A K R V T I M P K D I Q	H3 112-124
484	435	134949	142379	158481	145270	12029.4	17.1484	0.00347905	0.00353849	103666	107041	104600	105102	1742.67	16.6814	0.00169042	0.00169042	0.723498	-0.466939	0.485886	-1.04131	0.477725	-1.06575		9	484	435	I H A Kme R V T I M P K D I Q	H3 112-124	H3K115me1
485	436	188562	224287	376086	262978	99569.5	18.0046	0.00911666	0.00895417	136255	109175	114574	120001	14332.6	16.8727	0.00237591	0.00237591	0.456316	-1.13189	0.260612	-1.94002	0.265342	-1.91408		9	485	436	I H A Kme2 R V T I M P K D I Q	H3 112-124	H3K115me2
486	437	253319	161248	130302	181623	63989.5	17.4706	0.00522018	0.00521107	115867	107920	112632	112140	3996.31	16.7749	0.0020142	0.0020142	0.617431	-0.69565	0.38585	-1.37389	0.386524	-1.37137		9	486	437	I H A Kme3 R V T I M P K D I Q	H3 112-124	H3K115me3
487	438	236456	221400	214063	223973	11416.1	17.773	0.00724852	0.00715956	228901	218596	219941	222479	5601.84	17.7633	0.00709084	0.00709084	0.993331	-0.0096535	0.978247	-0.0317292	0.990401	-0.0139149		9	487	438	I H A Kac R V T I M P K D I Q	H3 112-124	H3K115ac
488	439	189969	218176	256879	221675	33591.9	17.7581	0.00713844	0.00705382	96711	96642	98719	97357.3	1179.74	16.571	0.00133408	0.00133408	0.43919	-1.18708	0.186887	-2.41976	0.189129	-2.40256		9	488	439	I H A K Rme V T I M P K D I Q	H3 112-124	H3R116me1
489	440	309535	414671	784549	502918	249500	18.94	0.0206085	0.0199936	96260	97533	93595	95796	2009.59	16.5477	0.00126225	0.00126225	0.19048	-2.39229	0.0612488	-4.02917	0.0631325	-3.98547		9	489	440	I H A K Rme2a V T I M P K D I Q	H3 112-124	H3R116me2a
490	441	2775340	387941	141152	1.10148e+06	1.45485e+06	20.071	0.0492763	0.0475328	84967	88034	90004	87668.3	2538.33	16.4198	0.000888299	0.000888299	0.0795916	-3.65124	0.0180269	-5.7937	0.0186881	-5.74173		9	490	441	I H A K Rme2s V T I M P K D I Q	H3 112-124	H3R116me2s
491	442	105205	94761	87712	95892.7	8801.24	16.5491	0.00111416	0.00126669	91013	92030	82922	88655	4990.9	16.4359	0.000933695	0.000933695	0.924523	-0.113218	0.838028	-0.25493	0.737112	-0.440045		9	491	442	I H A K Rcit V T I M P K D I Q	H3 112-124	H3R116cit
492	443	86983	112976	120142	106700	17447.6	16.7032	0.00163179	0.00176395	85059	91454	90063	88858.7	3363.3	16.4392	0.000943065	0.000943065	0.832787	-0.26398	0.577934	-0.791022	0.534634	-0.903376		9	492	443	I H A K R V T I M P Kme D I Q	H3 112-124	H3K122me1
493	444	138668	172667	220719	177351	41225.6	17.4363	0.00501559	0.00501454	90703	93135	93246	92361.3	1437.23	16.495	0.00110422	0.00110422	0.520782	-0.941249	0.220158	-2.18339	0.220204	-2.18309		9	493	444	I H A K R V T I M P Kme2 D I Q	H3 112-124	H3K122me2
494	445	375594	576280	210001	387292	183419	18.5631	0.0150706	0.0146737	101257	109305	104812	105125	4033.1	16.6817	0.00169145	0.00169145	0.271435	-1.88132	0.112235	-3.1554	0.115271	-3.1169		9	494	445	I H A K R V T I M P Kme3 D I Q	H3 112-124	H3K122me3
495	446	199507	228284	187008	204933	21166.2	17.6448	0.0063366	0.00628355	190203	188754	176620	185192	7459.13	17.4987	0.0053753	0.0053753	0.903673	-0.146128	0.848293	-0.237365	0.855456	-0.225235		9	495	446	I H A K R V T I M P Kac D I Q	H3 112-124	H3K122ac
496	447	94029	91061	116311	100467	13801.3	16.6164	0.00133324	0.00147715	88086	86543	89685	88104.7	1571.08	16.4269	0.000908374	0.000908374	0.876951	-0.189431	0.681327	-0.553581	0.614949	-0.701462		9	496	447	I H A Kme Rme V T I M P K D I Q	H3 112-124	H3K115me1	H3R116me1
497	448	137964	142855	152345	144388	7312.04	17.1396	0.00343682	0.00349792	113892	111090	121369	115450	5313.73	16.8169	0.00216653	0.00216653	0.799584	-0.322679	0.630386	-0.665692	0.619375	-0.691115		9	497	448	I H A Kme Rme2a V T I M P K D I Q	H3 112-124	H3K115me1	H3R116me2a
498	449	132114	122306	136328	130249	7194.57	16.9909	0.00275966	0.00284742	92070	113227	96282	100526	11198.9	16.6172	0.00147988	0.00147988	0.771799	-0.373703	0.536257	-0.899004	0.519729	-0.944168		9	498	449	I H A Kme Rme2s V T I M P K D I Q	H3 112-124	H3K115me1	H3R116me2s
499	450	116655	104027	100997	107226	8304.82	16.7103	0.00165698	0.00178815	96595	100344	97497	98145.3	1956.78	16.5826	0.00137034	0.00137034	0.91531	-0.127668	0.827009	-0.274024	0.766345	-0.383934		9	499	450	I H A Kme Rcit V T I M P K D I Q	H3 112-124	H3K115me1	H3R116cit
500	451	91810	86709	87965	88828	2657.75	16.4387	0.000775797	0.000941654	106927	88901	82529	92785.7	12654.4	16.5016	0.00112374	0.00112374	1.04455	0.0628874	1.4485	0.534561	1.19337	0.255043		9	500	451	I H A Kme2 Rme V T I M P K D I Q	H3 112-124	H3K115me2	H3R116me1
501	452	108863	108606	104864	107444	2238.33	16.7132	0.00166742	0.00179818	120189	88868	89692	99583	17850.1	16.6036	0.00143648	0.00143648	0.926833	-0.109618	0.8615	-0.215076	0.798855	-0.323994		9	501	452	I H A Kme2 Rme2a V T I M P K D I Q	H3 112-124	H3K115me2	H3R116me2a
502	453	97734	95777	98235	97248.7	1298.89	16.5694	0.0011791	0.00132908	86030	84022	84314	84788.7	1084.9	16.3716	0.000755808	0.000755808	0.871875	-0.197807	0.641003	-0.641597	0.568669	-0.814339		9	502	453	I H A Kme2 Rme2s V T I M P K D I Q	H3 112-124	H3K115me2	H3R116me2s
503	BLANK	108893	97920	92498	99770.3	8352.65	16.6063	0.00129988	0.0014451	86455	88604	88906	87988.3	1336.46	16.425	0.000903022	0.000903022	0.881909	-0.181299	0.694698	-0.525541	0.624885	-0.678338		9	503			BLANK-9
504	540	193829	195473	193988	194430	906.756	17.5689	0.00583357	0.00580031	182563	178755	177730	179683	2546.55	17.4551	0.0051218	0.0051218	0.924151	-0.1138	0.877988	-0.187727	0.883021	-0.17948		9	504	540	10% K R H Rcit Kme V L R D N I Q G	POSCTRL-9
505	454	81564	87862	81454	83626.7	3668.32	16.3517	0.000526681	0.000702345	80960	80897	86402	82753	3160.28	16.3365	0.000662149	0.000662149	0.989553	-0.0151514	1.25721	0.330225	0.942768	-0.0850254		10	505	454	I H A Kme2 Rcit V T I M P K D I Q	H3 112-124	H3K115me2	H3R116cit
506	455	77884	79306	78146	78445.3	756.784	16.2594	0.000278523	0.000463956	75360	75180	89442	79994	8182.7	16.2876	0.000535209	0.000535209	1.01974	0.0282042	1.9216	0.942305	1.15358	0.206114		10	506	455	I H A Kme3 Rme V T I M P K D I Q	H3 112-124	H3K115me3	H3R116me1
507	456	80873	81468	82677	81672.7	919.25	16.3176	0.000433095	0.000612443	72836	74760	77774	75123.3	2488.97	16.197	0.000311114	0.000311114	0.91981	-0.120592	0.71835	-0.477241	0.507988	-0.977133		10	507	456	I H A Kme3 Rme2a V T I M P K D I Q	H3 112-124	H3K115me3	H3R116me2a
508	457	86178	94935	88454	89855.7	4543.65	16.4553	0.000825017	0.000988936	79013	82476	87373	82954	4200.45	16.34	0.000671396	0.000671396	0.923192	-0.115298	0.813797	-0.297259	0.678908	-0.558713		10	508	457	I H A Kme3 Rme2s V T I M P K D I Q	H3 112-124	H3K115me3	H3R116me2s
509	458	89114	76110	76750	80658	7330.1	16.2995	0.000384498	0.000565759	87424	73512	75413	78783	7543.45	16.2656	0.000479492	0.000479492	0.976754	-0.0339333	1.24706	0.318531	0.84752	-0.238681		10	509	458	I H A Kme3 Rcit V T I M P K D I Q	H3 112-124	H3K115me3	H3R116cit
510	459	104837	109828	103128	105931	3481.4	16.6928	0.00159494	0.00172855	119536	115962	111799	115766	3872.23	16.8208	0.00218103	0.00218103	1.09284	0.128083	1.36747	0.451511	1.26177	0.335451		10	510	459	I H A Kac Rme V T I M P K D I Q	H3 112-124	H3K115ac	H3R116me1
511	460	122863	138689	141566	134373	10070.9	17.0359	0.00295714	0.00303713	134739	140551	125399	133563	7644.15	17.0272	0.00299987	0.00299987	0.993974	-0.0087193	1.01445	0.0206984	0.987734	-0.0178049		10	511	460	I H A Kac Rme2a V T I M P K D I Q	H3 112-124	H3K115ac	H3R116me2a
512	461	91870	102169	102151	98730	5940.94	16.5912	0.00125005	0.00139724	80758	85650	89467	85291.7	4365.54	16.3801	0.000778951	0.000778951	0.863888	-0.211084	0.623136	-0.682382	0.557493	-0.842973		10	512	461	I H A Kac Rme2s V T I M P K D I Q	H3 112-124	H3K115ac	H3R116me2s
513	462	440628	489723	188153	372835	161812	18.5082	0.0143782	0.0140086	514352	529127	202288	415256	184583	18.6636	0.0159603	0.0159603	1.11378	0.155464	1.11004	0.150607	1.13933	0.18818		10	513	462	I H A Kac Rcit V T I M P K D I Q	H3 112-124	H3K115ac	H3R116cit
514	463	74866	76085	76781	75910.7	969.33	16.212	0.000157126	0.000347339	76918	77271	79061	77750	1149	16.2466	0.000431965	0.000431965	1.02423	0.0345401	2.74916	1.45899	1.24364	0.314571		10	514	463	I H A Kme R V T I M P Kme D I Q	H3 112-124	H3K115me1	H3K122me3
515	464	77889	78307	1512116	556104	827931	19.085	0.0231558	0.0224406	72380	72487	72905	72590.7	277.428	16.1475	0.000194588	0.000194588	0.130534	-2.9375	0.00840342	-6.89481	0.00867124	-6.84955		10	515	464	I H A Kme R V T I M P Kme2 D I Q	H3 112-124	H3K115me1	H3K122me1
516	465	84880	84903	90486	86756.3	3230.01	16.4047	0.000676576	0.000846339	76474	76358	78771	77201	1360.9	16.2363	0.000406706	0.000406706	0.88986	-0.16835	0.601124	-0.734266	0.480547	-1.05725		10	516	465	I H A Kme R V T I M P Kme3 D I Q	H3 112-124	H3K115me1	H3K122me2
517	466	6684306	8056007	7859334	7.53322e+06	741725	22.8448	0.357322	0.343452	9962559	10362391	10501126	1.02754e+07	279633	23.2927	0.469615	0.469615	1.36401	0.447851	1.31426	0.394255	1.36734	0.451373		10	517	466	I H A Kme R V T I M P Kac D I Q	H3 112-124	H3K115me1	H3K122me3
518	467	76884	77218	79434	77845.3	1385.92	16.2483	0.000249786	0.000436351	78064	76701	77591	77452	692.05	16.241	0.000418254	0.000418254	0.994947	-0.00730806	1.67445	0.743684	0.958527	-0.0611096		10	518	467	I H A Kme2 R V T I M P Kme D I Q	H3 112-124	H3K115me2	H3K122ac
519	468	78924	79354	80663	79647	905.769	16.2813	0.000336077	0.000519244	79816	75589	74029	76478	2994.17	16.2228	0.000373441	0.000373441	0.960212	-0.0585752	1.11118	0.15209	0.719201	-0.475532		10	519	468	I H A Kme2 R V T I M P Kme2 D I Q	H3 112-124	H3K115me2	H3K122me2
520	469	80701	82791	83097	82196.3	1304	16.3268	0.000458176	0.000636537	74210	75152	73736	74366	720.775	16.1824	0.00027627	0.00027627	0.904736	-0.144431	0.602977	-0.729825	0.43402	-1.20417		10	520	469	I H A Kme2 R V T I M P Kme3 D I Q	H3 112-124	H3K115me2	H3K122me3
521	470	157595	199642	200818	186018	24622.4	17.5051	0.00543069	0.0054133	136146	154712	203098	164652	34565.1	17.3291	0.00443025	0.00443025	0.885139	-0.176025	0.815781	-0.293747	0.818402	-0.289119		10	521	470	I H A Kme2 R V T I M P Kac D I Q	H3 112-124	H3K115me2	H3K122ac
522	471	104997	75569	74448	85004.7	17322.9	16.3753	0.00059268	0.000765746	94227	75349	75964	81846.7	10726.1	16.3206	0.000620449	0.000620449	0.962849	-0.0546184	1.04685	0.0660589	0.810254	-0.303553		10	522	471	I H A Kme3 R V T I M P Kme D I Q	H3 112-124	H3K115me3	H3K122ac
523	472	75159	74676	76042	75292.3	692.692	16.2002	0.000127511	0.00031889	74352	74858	74416	74542	275.529	16.1858	0.000284367	0.000284367	0.990034	-0.0144494	2.23013	1.15713	0.891742	-0.165301		10	523	472	I H A Kme3 R V T I M P Kme2 D I Q	H3 112-124	H3K115me3	H3K122me2
524	473	78224	81898	78230	79450.7	2119.45	16.2778	0.000326673	0.000510211	74624	74024	76799	75149	1460.09	16.1975	0.000312295	0.000312295	0.945857	-0.0803054	0.955985	-0.0649397	0.61209	-0.708185		10	524	473	I H A Kme3 R V T I M P Kme3 D I Q	H3 112-124	H3K115me3	H3K122me3
525	474	219245	271360	351516	280707	66629	18.0987	0.00996577	0.00976985	204976	213758	319265	246000	63601.4	17.9083	0.00817299	0.00817299	0.876357	-0.190409	0.820106	-0.286117	0.836553	-0.257472		10	525	474	I H A Kme3 R V T I M P Kac D I Q	H3 112-124	H3K115me3	H3K122ac
526	475	1001158	328006	127408	485524	457678	18.8892	0.0197754	0.0191933	200648	313989	139557	218065	88510.7	17.7344	0.00688773	0.00688773	0.449133	-1.15479	0.348298	-1.52161	0.358861	-1.4785		10	526	475	I H A Kac R V T I M P Kme D I Q	H3 112-124	H3K115ac	H3K122me2
527	476	185651	153479	172372	170501	16167.4	17.3794	0.00468748	0.00469935	225506	208102	162029	198546	32799.8	17.5991	0.00598967	0.00598967	1.16449	0.219693	1.2778	0.353665	1.27458	0.350017		10	527	476	I H A Kac R V T I M P Kme2 D I Q	H3 112-124	H3K115ac	H3K122me3
528	477	111556	108900	125091	115182	8683.31	16.8136	0.00203803	0.0021542	108832	114078	113323	112078	2836.07	16.7741	0.00201135	0.00201135	0.973046	-0.0394206	0.986911	-0.0190085	0.933691	-0.0989833		10	528	477	I H A Kac R V T I M P Kme3 D I Q	H3 112-124	H3K115ac	H3K122ac
529	478	370199	532546	552186	484977	99884.6	18.8876	0.0197492	0.0191681	888908	724006	865171	826028	89147.5	19.6558	0.0348596	0.0348596	1.70323	0.768275	1.76512	0.819762	1.81862	0.862847		10	529	478	I H A Kac R V T I M P Kac D I Q	H3 112-124	H3K115ac	H3K122ac
530	H1	103339	102724	106905	104323	2257.41	16.6707	0.00151791	0.00165455	96501	94119	99757	96792.3	2830.27	16.5626	0.00130809	0.00130809	0.927817	-0.108088	0.861769	-0.214627	0.790599	-0.338982		10	530	H1	A R T K Q T A R K S T G G	Unmod H3 variant
531	H2	74774	77822	75896	76164	1541.57	16.2168	0.00016926	0.000358994	74516	75236	75264	75005.3	424.006	16.1947	0.000305685	0.000305685	0.984787	-0.0221161	1.80601	0.852807	0.851504	-0.231915		10	531	H2	T A R K S T G G K A P R K	Unmod H3 variant
532	H3	74553	75443	77315	75770.3	1409.79	16.2093	0.000150405	0.000340882	71782	72259	70609	71550	849.113	16.1267	0.000146708	0.000146708	0.944301	-0.0826813	0.975418	-0.0359071	0.430377	-1.21633		10	532	H3	T G G K A P R K Q L A T K	Unmod H3 variant
533	H4	84133	85385	86703	85407	1285.14	16.3821	0.00061195	0.000784257	80776	79433	86619	82276	3820.62	16.3282	0.000640202	0.000640202	0.96334	-0.0538827	1.04617	0.0651146	0.816317	-0.292799		10	533	H4	P R K Q L A T K A A R K S	Unmod H3 variant
534	H5	85443	92702	96770	91638.3	5737.92	16.4837	0.000910397	0.00107096	90814	87237	90987	89679.3	2116.89	16.4525	0.000980823	0.000980823	0.978622	-0.0311757	1.07736	0.107497	0.91584	-0.126833		10	534	H5	A T K A A R K S A P A T G	Unmod H3 variant
535	H6	106058	82290	81832	90060	13856.6	16.4586	0.000834803	0.000998338	113417	78866	79438	90573.7	19785	16.4668	0.00102197	0.00102197	1.0057	0.00820519	1.22421	0.291846	1.02367	0.0337546		10	535	H6	A T K A A R K S A P S T G	Unmod H3 variant
536	H7	76884	92546	76749	82059.7	9081.68	16.3244	0.00045163	0.000630249	75327	73196	75048	74523.7	1158.22	16.1854	0.000283524	0.000283524	0.908164	-0.138975	0.627778	-0.671673	0.44986	-1.15245		10	536	H7	R K S A P A T G G V K K P	Unmod H3 variant
537	H8	78329	77889	84048	80088.7	3435.93	16.2893	0.00035723	0.000539565	73426	75263	76932	75207	1753.67	16.1986	0.000314963	0.000314963	0.939047	-0.0907312	0.881682	-0.181669	0.583736	-0.776612		10	537	H8	R K S A P S T G G V K K P	Unmod H3 variant
538	H9	82211	88289	88764	86421.3	3653.98	16.3991	0.000660531	0.000830926	77010	79481	89475	81988.7	6600.03	16.3231	0.000626982	0.000626982	0.948709	-0.075963	0.94921	-0.0752013	0.754559	-0.406295		10	538	H9	A T G G V K K P H R Y R P	Unmod H3 variant
539	H10	84313	89568	75197	83026	7271.43	16.3413	0.000497913	0.000674709	86481	86888	73722	82363.7	7486.67	16.3297	0.000644236	0.000644236	0.992023	-0.0115551	1.29387	0.371696	0.954835	-0.066677		10	539	H10	K K P H R Y R P G T V A L	Unmod H3 variant
540	H11	88646	86188	88193	87675.7	1308.12	16.4199	0.000720607	0.000888636	85393	85315	83263	84657	1207.87	16.3693	0.00074975	0.00074975	0.96557	-0.0505471	1.04044	0.0571977	0.843708	-0.245184		10	540	H11	Y R P G T V A L R E I R R	Unmod H3 variant
541	H12	86926	88086	91077	88696.3	2141.75	16.4366	0.000769491	0.000935596	82514	82191	87798	84167.7	3148.11	16.361	0.000727236	0.000727236	0.948942	-0.0756083	0.945087	-0.0814806	0.777297	-0.363462		10	541	H12	V A L R E I R R Y Q K S T	Unmod H3 variant
542	H13	82938	80466	83312	82238.7	1546.52	16.3275	0.000460204	0.000638485	74041	73558	76407	74668.7	1524.69	16.1882	0.000290195	0.000290195	0.907951	-0.139314	0.63058	-0.665249	0.454506	-1.13763		10	542	H13	I R RY Q K S T E L L I R	Unmod H3 variant
543	H14	87335	94768	97464	93189	5245.86	16.5079	0.000984666	0.0011423	87159	93944	93135	91412.7	3705.93	16.4801	0.00106057	0.00106057	0.980938	-0.0277656	1.07709	0.107137	0.928453	-0.107098		10	543	H14	K S T E L L I R K L P F Q	Unmod H3 variant
544	H15	74352	75091	76023	75155.3	837.356	16.1976	0.00012095	0.000312586	74596	73483	73962	74013.7	558.296	16.1755	0.000260059	0.000260059	0.984809	-0.0220838	2.15014	1.10443	0.83196	-0.265415		10	544	H15	L I R K L P F Q R L V R E	Unmod H3 variant
545	H16	79021	79284	79885	79396.7	442.882	16.2768	0.000324087	0.000507726	75944	74009	76828	75593.7	1441.78	16.206	0.000332754	0.000332754	0.952101	-0.0708131	1.02674	0.0380732	0.65538	-0.609597		10	545	H16	P F Q R L V R E I A Q D F	Unmod H3 variant
546	H17	77569	79628	80292	79163	1419.81	16.2725	0.000312896	0.000496976	69912	72534	73812	72086	1988.22	16.1374	0.000171369	0.000171369	0.910602	-0.135107	0.547687	-0.868577	0.344823	-1.53607		10	546	H17	V R E I A Q D F K T D L R	Unmod H3 variant
547	H18	101281	87946	90165	93130.7	7145.06	16.507	0.000981872	0.00113962	80574	86767	92959	86766.7	6192.5	16.4049	0.000846814	0.000846814	0.931666	-0.102115	0.862449	-0.21349	0.743069	-0.428431		10	547	H18	Q D F K T D L R F Q S S A	Unmod H3 variant
548	H19	112125	91811	89820	97918.7	12343.3	16.5793	0.00121119	0.00135991	115752	96004	89470	100409	13683.4	16.6155	0.00147447	0.00147447	1.02543	0.036228	1.21737	0.283771	1.08424	0.116688		10	548	H19	D L R F Q S S A V M A L Q	Unmod H3 variant
549	H20	88448	90862	92116	90475.3	1864.32	16.4652	0.000854696	0.00101745	92604	88269	122784	101219	18801.2	16.6271	0.00151175	0.00151175	1.11875	0.161884	1.76876	0.822741	1.48583	0.57127		10	549	H20	D L R F Q S A A I G A L Q	Unmod H3 variant
550	H21	75905	78229	76117	76750.3	1284.94	16.2279	0.000197342	0.000385971	68703	71509	73123	71111.7	2236.63	16.1178	0.000126541	0.000126541	0.926532	-0.110087	0.641225	-0.641097	0.32785	-1.60889		10	550	H21	A L Q E A C E A Y L V G L	Unmod H3 variant
551	H22	123011	84711	81224	96315.3	23184.8	16.5555	0.0011344	0.00128614	71334	74452	79585	75123.7	4166.31	16.197	0.000311129	0.000311129	0.779976	-0.358498	0.274268	-1.86634	0.241909	-2.04746		10	551	H22	A L Q E A S E A Y L V G L	Unmod H3 variant
552	H23	82151	81872	74029	79350.7	4610.81	16.276	0.000321884	0.00050561	82117	87490	75638	81748.3	5934.59	16.3189	0.000615925	0.000615925	1.03022	0.042947	1.9135	0.936214	1.21818	0.284729		10	552	H23	V G L F E D T N L C A I H	Unmod H3 variant
553	H24	90848	80468	82666	84660.7	5469.93	16.3694	0.000576204	0.000749919	80533	79959	78302	79598	1158.48	16.2804	0.00051699	0.00051699	0.9402	-0.0889597	0.897233	-0.156445	0.689394	-0.536599		10	553	H24	D T N L C A I H A K R V T	Unmod H3 variant
554	H25	81854	82138	82492	82161.3	319.639	16.3262	0.0004565	0.000634926	80839	78785	81027	80217	1243.71	16.2916	0.000545469	0.000545469	0.976335	-0.0345516	1.1949	0.256884	0.859106	-0.219091		10	554	H25	A I H A K R V T I M P K D	Unmod H3 variant
555	H26	84287	94147	88927	89120.3	4932.84	16.4435	0.000789798	0.000955104	80909	76536	81167	79537.3	2602.43	16.2793	0.000514198	0.000514198	0.892471	-0.164122	0.65105	-0.619159	0.538369	-0.893333		10	555	H26	R V T I M P K D I Q L A R	Unmod H3 variant
556	H27	91794	80388	86420	86200.7	5706.16	16.3954	0.000649962	0.000820773	80094	80315	82390	80933	1266.63	16.3044	0.000578412	0.000578412	0.938891	-0.090971	0.889916	-0.168258	0.704716	-0.504886		10	556	H27	D I Q L A R R I R G E R A	Unmod H3 variant
559	925	81750	83640	129236	98208.7	26887.1	16.5836	0.00122508	0.00137325	74368	74194	75119	74560.3	491.579	16.1861	0.000285211	0.000285211	0.759203	-0.397442	0.23281	-2.10278	0.20769	-2.26749		10	559	925	10% K G K G K G K G K G K G K	NEGCTRL-10
560	926	876577	1092963	1262379	1.07731e+06	193377	20.039	0.0481186	0.0464207	1106942	1226925	1211087	1.18165e+06	65183	20.1724	0.0512215	0.0512215	1.09686	0.133376	1.06449	0.090156	1.10342	0.141982		10	560	926	10% Kac G Kac G Kac G Kac G Kac G Kac G Kac	POSCTRL-10
561	479	4041855	3876736	4447648	4.12208e+06	293789	21.9749	0.193947	0.186508	4248552	4394418	4259736	4300902	81180.1	22.0362	0.194736	0.194736	1.04338	0.0612669	1.00407	0.00585543	1.04411	0.0622781		11	561	479	S G R G K G G K G L G K G	H4 1-13
562	480	130875	129080	137220	132392	4276.69	17.0145	0.00286226	0.00294598	124267	127505	129936	127236	2844.06	16.9571	0.00270877	0.00270877	0.961057	-0.0573054	0.946375	-0.079516	0.919481	-0.121109		11	562	480	Sph G R G K G G K G L G K G	H4 1-13	H4S1ph
563	481	451337	452410	464212	455986	7143.81	18.7986	0.0183607	0.0178343	469487	535499	487496	497494	34122.8	18.9243	0.019744	0.019744	1.09103	0.125689	1.07534	0.104795	1.10708	0.146762		11	563	481	S G Rme G K G G K G L G K G	H4 1-13	H4R3me1
564	482	110346	119117	112381	113948	4590.67	16.798	0.00197891	0.0020974	100220	109781	122702	110901	11282.8	16.7589	0.00195721	0.00195721	0.97326	-0.0391032	0.989036	-0.0159043	0.93316	-0.0998032		11	564	482	S G Rme2a G K G G K G L G K G	H4 1-13	H4R3me2a
565	483	105858	106360	103408	105209	1579.49	16.6829	0.00156034	0.00169532	100032	98090	100377	99499.7	1232.93	16.6024	0.00143265	0.00143265	0.945736	-0.08049	0.918163	-0.123178	0.845063	-0.242868		11	565	483	S G Rme2s G K G G K G L G K G	H4 1-13	H4R3me2s
566	484	100035	100664	103425	101375	1803.28	16.6293	0.00137672	0.00151892	98630	97092	99486	98402.7	1213.08	16.5864	0.00138218	0.00138218	0.970683	-0.0429279	1.00397	0.0057119	0.909976	-0.1361		11	566	484	S G Rcit G K G G K G L G K G	H4 1-13	H4R3cit
567	485	107309	110199	121543	113017	7523.8	16.7862	0.00193432	0.00205457	107131	105825	105820	106259	755.467	16.6972	0.00174362	0.00174362	0.940201	-0.0889593	0.901415	-0.149737	0.848657	-0.236747		11	567	485	S G R G Kac G G K G L G K G	H4 1-13	H4K5ac
568	486	241780	243986	240870	242212	1602.29	17.8859	0.00812207	0.00799872	256707	255967	253616	255430	1613.95	17.9626	0.00860687	0.00860687	1.05457	0.0766576	1.05969	0.0836422	1.07603	0.105719		11	568	486	S G R G K G G Kac G L G K G	H4 1-13	H4K8ac	H4R3me1
569	487	2790004	3687751	3361025	3.27959e+06	454380	21.6451	0.153596	0.147746	3473123	3722346	3530350	3575273	130543	21.7696	0.16135	0.16135	1.09016	0.124536	1.05048	0.0710506	1.09208	0.127074		11	569	487	S G R G K G G K G L G Kac G	H4 1-13	H4K12ac	H4R3me2a
570	488	145347	143426	146414	145062	1514.2	17.1463	0.00346912	0.00352895	150562	147832	151776	150057	2019.98	17.1951	0.00375873	0.00375873	1.03443	0.0488345	1.08348	0.115677	1.06511	0.0910083		11	570	488	Sph G Rme G K G G K G L G K G	H4 1-13	H4S1ph	H4R3me2s
571	489	148826	150957	159799	153194	5818.49	17.225	0.00385858	0.00390308	164515	176717	173835	171689	6377.79	17.3894	0.00475402	0.00475402	1.12073	0.164438	1.23206	0.301077	1.21802	0.284535		11	571	489	Sph G Rme2a G K G G K G L G K G	H4 1-13	H4S1ph	H4R3cit
572	490	161998	178234	201027	180420	19606.1	17.461	0.00516255	0.00515571	174217	179535	206374	186709	17237	17.5104	0.00544506	0.00544506	1.03486	0.0494323	1.05472	0.0768657	1.05612	0.0787773		11	572	490	Sph G Rme2s G K G G K G L G K G	H4 1-13	H4S1ph	H4K5ac
573	491	163127	129566	117754	136816	23539.2	17.0619	0.00307415	0.00314953	169845	149000	122951	147265	23495.1	17.1681	0.00363031	0.00363031	1.07638	0.106184	1.18091	0.239905	1.15265	0.204957		11	573	491	Sph G Rcit G K G G K G L G K G	H4 1-13	H4S1ph	H4K8ac	H4K12ac
574	492	931814	932387	967633	943945	20516.7	19.8483	0.0417313	0.0402849	1037136	1017394	932786	995772	55433.4	19.9255	0.0426694	0.0426694	1.05491	0.0771132	1.02248	0.0320718	1.05919	0.0829638		11	574	492	Sph G R G Kac G G K G L G K G	H4 1-13	H4S1ph	H4K12ac
575	493	3528188	3101831	3277216	3.30241e+06	214292	21.6551	0.154689	0.148796	3605304	3944033	3617494	3722277	192143	21.8278	0.168114	0.168114	1.12714	0.172665	1.08678	0.120064	1.12983	0.176101		11	575	493	Sph G R G K G G Kac G L G K G	H4 1-13	H4S1ph	H4K8ac
576	494	504271	530281	580419	538324	38705.9	19.0381	0.0223042	0.0216226	587889	599836	607959	598561	10095.5	19.1911	0.0243941	0.0243941	1.1119	0.153025	1.0937	0.129213	1.12818	0.173992		11	576	494	Sph G R G K G G K G L G Kac G	H4 1-13	H4S1ph	H4K12ac
577	495	21289604	19452755	19546531	2.00963e+07	1.0345e+06	24.2604	0.959026	0.921469	20660765	20871944	20493876	2.06755e+07	189466	24.3014	0.948119	0.948119	1.02882	0.0409945	0.988626	-0.0165026	1.02892	0.0411325		11	577	495	S G R G Kac G G Kac G L G K G	H4 1-13	H4K5ac	H4K12ac
578	496	6922600	7020429	6292638	6.74522e+06	394990	22.6854	0.319581	0.307197	7375829	6441622	6944396	6.92062e+06	467557	22.7225	0.315267	0.315267	1.026	0.0370344	0.986498	-0.0196113	1.02627	0.0374087		11	578	496	S G R G Kac G G K G L G Kac G	H4 1-13	H4K5ac	H4K8ac
579	497	3561043	3751872	3902658	3.73852e+06	171198	21.834	0.175577	0.168861	4096295	4943452	4502073	4513940	423703	22.106	0.204537	0.204537	1.20741	0.271918	1.16495	0.220263	1.21128	0.276527		11	579	497	S G R G K G G Kac G L G Kac G	H4 1-13	H4K8ac
580	498	7239151	8232258	9341773	8.27106e+06	1.05185e+06	22.9796	0.392661	0.377399	10588355	9319942	8729984	9.54609e+06	949602	23.1865	0.436063	0.436063	1.15416	0.206838	1.11053	0.151251	1.15544	0.208443		11	580	498	S G R G Kac G G Kac G L G Kac G	H4 1-13	H4K5ac
581	499	302441	275038	262625	280035	20372.9	18.0952	0.00993357	0.00973891	271257	280313	279923	277164	5119.62	18.0804	0.00960685	0.00960685	0.98975	-0.0148638	0.96711	-0.0482486	0.98644	-0.0196971		11	581	499	K G L G K G G G A K R H R	H4 8-19
582	500	342215	392366	369890	368157	25120.4	18.49	0.0141542	0.0137933	409594	439276	420433	423101	15019.8	18.6906	0.0163213	0.0163213	1.14924	0.200681	1.15311	0.205528	1.18327	0.242781		11	582	500	Kac G L G K G G G A K R H R	H4 8-19	H4K8ac
583	501	427971	418729	427197	424632	5127.06	18.6959	0.016859	0.0163917	461409	475993	458977	465460	9202.83	18.8283	0.0182702	0.0182702	1.09615	0.132442	1.0837	0.115969	1.1146	0.156521		11	583	501	K G L G Kac G G G A K R H R	H4 8-19	H4K12ac
584	502	4743712	416091	385452	1.84842e+06	2.50744e+06	20.8179	0.0850507	0.0818989	466493	479950	463765	470069	8664.94	18.8425	0.0184823	0.0184823	0.254309	-1.97535	0.217309	-2.20218	0.225671	-2.1477		11	584	502	K G L G K G G G A Kac R H R	H4 8-19	H4K16ac
585	503	129686	125775	122206	125889	3741.3	16.9418	0.00255082	0.0026468	137840	135045	127373	133419	5419.56	17.0256	0.00299326	0.00299326	1.05982	0.0838155	1.17345	0.230758	1.1309	0.177471		11	585	503	K G L G K G G G A K Rme H R	H4 8-19	H4R17me1		H4K16ac
586	504	117833	118171	113427	116477	2646.78	16.8297	0.00210004	0.00221376	125249	132578	124248	127358	4547.99	16.9585	0.0027144	0.0027144	1.09342	0.128848	1.29255	0.370221	1.22615	0.294135		11	586	504	K G L G K G G G A K Rme2a H R	H4 8-19	H4R17me2a
587	505	98681	99405	107240	101775	4746.36	16.635	0.00139591	0.00153735	107329	111851	121668	113616	7330.63	16.7938	0.00208213	0.00208213	1.11634	0.158778	1.4916	0.576859	1.35436	0.437614		11	587	505	K G L G K G G G A K Rme2s H R	H4 8-19	H4R17me2s	H4K12ac
588	506	171954	190267	303222	221814	71093.2	17.759	0.00714513	0.00706024	262732	223387	162928	216349	50272.9	17.723	0.00680879	0.00680879	0.975361	-0.0359921	0.952927	-0.0695617	0.964384	-0.0523199		11	588	506	K G L G K G G G A K Rcit H R	H4 8-19	H4R17cit	H4K16ac
589	507	1390987	1563984	1520320	1.49176e+06	89964.4	20.5086	0.0679689	0.0654896	1750424	1766960	1703716	1.74037e+06	32799.6	20.731	0.0769276	0.0769276	1.16665	0.222372	1.13181	0.178626	1.17465	0.232236		11	589	507	Kac G L G Kac G G G A K R H R	H4 8-19	H4K8ac	H4K16ac
590	508	528776	589487	641778	586680	56553.3	19.1622	0.0246203	0.0238474	671351	705689	733877	703639	31313.4	19.4245	0.0292286	0.0292286	1.19936	0.262261	1.18718	0.247535	1.22565	0.293547		11	590	508	Kac G L G K G G G A Kac R H R	H4 8-19	H4K8ac	H4K12ac
591	509	2454170	2148841	2304601	2.30254e+06	152675	21.1348	0.106801	0.102793	2302924	2410387	2346612	2.35331e+06	54043.5	21.1663	0.105128	0.105128	1.02205	0.0314654	0.984344	-0.0227661	1.02272	0.0324174		11	591	509	K G L G Kac G G G A Kac R H R	H4 8-19	H4K12ac	H4R17me1
592	510	3737558	3661496	3534865	3.64464e+06	102392	21.7973	0.17108	0.164542	4217934	4724676	4137498	4360036	318338	22.0559	0.197456	0.197456	1.19629	0.258564	1.15418	0.206862	1.20004	0.263082		11	592	510	Kac G L G Kac G G G A Kac R H R	H4 8-19	H4K8ac	H4R17me2a
593	511	564336	569575	608232	580714	23974.5	19.1475	0.0243345	0.0235729	614416	648381	624501	629099	17443.2	19.2629	0.0257991	0.0257991	1.08332	0.115459	1.06019	0.0843162	1.09444	0.130189		11	593	511	K G L G K G G G A Kac Rme H R	H4 8-19	H4K16ac	H4R17me2s
594	512	437365	473424	454031	454940	18046.7	18.7953	0.0183106	0.0177862	496494	523546	492889	504310	16756.4	18.944	0.0200576	0.0200576	1.10852	0.148634	1.09541	0.131472	1.12771	0.173395		11	594	512	K G L G K G G G A Kac Rme2a H R	H4 8-19	H4K16ac	H4R17cit
595	513	340978	360747	319678	340468	20539.3	18.3772	0.012828	0.0125194	362616	376542	370700	369953	6993.01	18.497	0.013876	0.013876	1.0866	0.119823	1.08169	0.113293	1.10836	0.148424		11	595	513	K G L G K G G G A Kac Rme2s H R	H4 8-19	H4K16ac
596	514	459605	463234	420415	447751	23743.4	18.7723	0.0179663	0.0174554	561960	617195	572812	583989	29264.7	19.1556	0.0237236	0.0237236	1.30427	0.383243	1.32045	0.40103	1.3591	0.442648		11	596	514	K G L G K G G G A Kac Rcit H R	H4 8-19	H4K16ac
597	515	105545	102907	104974	104475	1387.9	16.6728	0.00152522	0.00166158	108369	109236	104824	107476	2337.54	16.7137	0.00179965	0.00179965	1.02872	0.0408566	1.17993	0.238697	1.0831	0.115164		11	597	515	K R H R K V L R D N I Q G	H4 16-28
598	516	93440	90087	91519	91682	1682.43	16.4844	0.000912489	0.00107296	87062	85877	84783	85907.3	1139.8	16.3905	0.000807277	0.000807277	0.937014	-0.0938572	0.884698	-0.176743	0.75238	-0.410467		11	598	516	K R H Rme K V L R D N I Q G	H4 16-28	H4R19me1
599	517	115062	115843	123822	118242	4847.89	16.8514	0.00218459	0.00229498	107663	108743	109489	108632	918.077	16.7291	0.0018528	0.0018528	0.918721	-0.122302	0.848126	-0.237649	0.807328	-0.308773		11	599	517	K R H Rme2a K V L R D N I Q G	H4 16-28	H4R19me2a
600	518	110290	115383	116022	113898	3141.2	16.7974	0.00197653	0.00209512	108859	113425	116031	112772	3630.36	16.783	0.00204328	0.00204328	0.990108	-0.014342	1.03377	0.0479176	0.975258	-0.0361438		11	600	518	K R H Rme2s K V L R D N I Q G	H4 16-28	H4R19me2s
601	519	96067	97087	93290	95481.3	1965.08	16.5429	0.00109446	0.00124777	104632	99932	96967	100510	3865.09	16.617	0.00147915	0.00147915	1.05267	0.0740532	1.35149	0.434553	1.18544	0.245417		11	601	519	K R H Rcit K V L R D N I Q G	H4 16-28	H4R19cit
602	520	86586	89097	88777	88153.3	1366.75	16.4277	0.000743484	0.000910613	87723	81554	81669	83648.7	3528.94	16.3521	0.000703357	0.000703357	0.9489	-0.0756726	0.946029	-0.0800443	0.7724	-0.372581		11	602	520	K R H R Kme V L R D N I Q G	H4 16-28	H4K20me1
603	521	150051	159581	157996	155876	5106.47	17.25	0.00398704	0.00402648	155786	164423	163485	161231	4739.06	17.2988	0.00427287	0.00427287	1.03436	0.0487333	1.07169	0.099889	1.06119	0.0856878		11	603	521	K R H R Kme2 V L R D N I Q G	H4 16-28	H4K20me2
604	522	125229	123995	123602	124275	848.954	16.9232	0.00247353	0.00257256	120515	124564	125672	123584	2714.67	16.9151	0.00254073	0.00254073	0.994434	-0.00805189	1.02717	0.0386712	0.98763	-0.0179577		11	604	522	K R H R Kme3 V L R D N I Q G	H4 16-28	H4K20me3
605	523	344692	335336	322013	334014	11397.2	18.3495	0.0125189	0.0122224	344960	333377	333617	337318	6619.25	18.3637	0.0123745	0.0123745	1.00989	0.0142022	0.988465	-0.0167379	1.01244	0.0178344		11	605	523	K R H R Kac V L R D N I Q G	H4 16-28	H4K20ac
606	524	102825	102476	106715	104005	2353.12	16.6663	0.00150271	0.00163995	99530	101284	102766	101193	1619.9	16.6268	0.00151057	0.00151057	0.972963	-0.0395433	1.00523	0.00752921	0.921109	-0.118557		11	606	524	K R H R K V L Rme D N I Q G	H4 16-28	H4R23me1
607	525	145133	141294	146062	144163	2527.67	17.1373	0.00342605	0.00348757	150482	142253	142249	144995	4752.17	17.1456	0.00352584	0.00352584	1.00577	0.0082989	1.02913	0.0414205	1.01097	0.0157425		11	607	525	K R H R K V L Rme2a D N I Q G	H4 16-28	H4R23me2a
608	526	148359	144537	156957	149951	6361.21	17.1941	0.00370326	0.00375387	138997	135403	142360	138920	3479.14	17.0839	0.00324635	0.00324635	0.926436	-0.110237	0.876618	-0.18998	0.864799	-0.209563		11	608	526	K R H R K V L Rme2s D N I Q G	H4 16-28	H4R23me2s
609	527	168565	176859	166272	170565	5569.75	17.38	0.00469058	0.00470232	168297	168422	163783	166834	2642.98	17.3481	0.00453065	0.00453065	0.978124	-0.0319111	0.965904	-0.0500488	0.963491	-0.0536564		11	609	527	K R H R K V L Rcit D N I Q G	H4 16-28	H4R23cit
610	528	130152	130178	126885	129072	1893.75	16.9778	0.00270325	0.00279323	127681	125871	127732	127095	1060.03	16.9555	0.00270227	0.00270227	0.984683	-0.0222688	0.999637	-0.000523716	0.967436	-0.0477626		11	610	528	K R H Rme Kme V L R D N I Q G	H4 16-28	H4R19me1	H4K20me1
611	529	245866	193711	209183	216253	26786.7	17.7224	0.00687879	0.00680439	191767	194609	195417	193931	1917.13	17.5652	0.00577736	0.00577736	0.896777	-0.157179	0.83988	-0.251745	0.849063	-0.236056		11	611	529	K R H Rme Kme2 V L R D N I Q G	H4 16-28	H4R19me1	H4K20me2
612	530	100761	101656	99227	100548	1228.43	16.6175	0.00133712	0.00148088	92499	94983	94972	94151.3	1430.97	16.5227	0.00118658	0.00118658	0.936382	-0.094831	0.887411	-0.172326	0.801263	-0.319651		11	612	530	K R H Rme Kme3 V L R D N I Q G	H4 16-28	H4R19me1	H4K20me3
613	531	236485	242002	251525	243337	7608.4	17.8926	0.00817596	0.0080505	225973	232197	236710	231627	5391.17	17.8214	0.0075117	0.0075117	0.951875	-0.0711563	0.918754	-0.122249	0.933073	-0.0999386		11	613	531	K R H Rme Kac V L R D N I Q G	H4 16-28	H4R19me1	H4K20ac
614	532	194407	175364	174099	181290	11377.3	17.4679	0.00520423	0.00519575	185772	185334	186036	185714	354.576	17.5027	0.0053993	0.0053993	1.0244	0.0347832	1.03748	0.053087	1.03918	0.0554389		11	614	532	K R H Rme2a Kme V L R D N I Q G	H4 16-28	H4R19me2a	H4K20me1
615	BLANK-11	85615	86179	91234	87676	3094.2	16.4199	0.000720623	0.000888652	80983	86789	82471	83414.3	3015.76	16.348	0.000692576	0.000692576	0.951393	-0.0718867	0.96108	-0.0572716	0.779356	-0.359646		11	615			BLANK-11
616	481	199345	190698	190107	193383	5171.4	17.5611	0.00578344	0.00575216	190063	187884	189238	189062	1100.15	17.5285	0.00555332	0.00555332	0.977652	-0.0326066	0.960211	-0.058576	0.965433	-0.0507523		11	616	481	5% S G Rme G K G G K G L G K G	NEGCTRL-11
617	533	158620	162720	160884	160741	2053.72	17.2944	0.00422006	0.00425033	160225	168142	162391	163586	4091.55	17.3197	0.00438121	0.00438121	1.0177	0.0253083	1.03819	0.0540651	1.03079	0.0437548		12	617	533	K R H Rme2a Kme2 V L R D N I Q G	H4 16-28	H4R19me2a	H4K20me2
618	534	153160	154777	150600	152846	2106.17	17.2217	0.0038419	0.00388705	160901	155998	153771	156890	3647.74	17.2594	0.00407313	0.00407313	1.02646	0.0376777	1.06019	0.084318	1.04787	0.0674609		12	618	534	K R H Rme2a Kme3 V L R D N I Q G	H4 16-28	H4R19me2a	H4K20me3
619	535	336800	325343	315664	325936	10580.5	18.3142	0.012132	0.0118508	343740	330299	332471	335503	7215.36	18.356	0.012291	0.012291	1.02935	0.0417399	1.01311	0.0187848	1.03715	0.052618		12	619	535	K R H Rme2a Kac V L R D N I Q G	H4 16-28	H4R19me2a	H4K20ac
620	536	127656	127795	122848	126100	2816.88	16.9442	0.00256091	0.00265649	120595	115721	115954	117423	2749.21	16.8414	0.0022573	0.0022573	0.931195	-0.102845	0.881445	-0.182057	0.84973	-0.234923		12	620	536	K R H Rme2s Kme V L R D N I Q G	H4 16-28	H4R19me2s	H4K20me1
621	537	130260	151027	156338	145875	13781.2	17.1544	0.00350804	0.00356634	137973	156037	167641	153884	14950.8	17.2315	0.00393481	0.00393481	1.0549	0.0771075	1.12165	0.165628	1.10332	0.141851		12	621	537	K R H Rme2s Kme2 V L R D N I Q G	H4 16-28	H4R19me2s	H4K20me2
622	538	250464	255459	238739	248221	8582.77	17.9213	0.00840985	0.00827518	263688	277916	244721	262108	16653.8	17.9998	0.00891414	0.00891414	1.05595	0.07854	1.05996	0.0840152	1.07721	0.107305		12	622	538	K R H Rme2s Kme3 V L R D N I Q G	H4 16-28	H4R19me2s	H4K20me3
623	540	580100	658651	722011	653587	71090.9	19.318	0.0278247	0.0269258	730214	835644	798549	788136	53480.8	19.5881	0.0331162	0.0331162	1.20586	0.270064	1.19017	0.25117	1.22991	0.298551		12	623	540	K R H Rcit Kme V L R D N I Q G	H4 16-28	H4R19cit	H4K20me1
[truncated: 316 more rows]

## Sheet: 10_116975_HATS
FOR SORTING	peptide#	635-spot1	635-spot2	635-spot3	635-Avg Total Signal Array1 well1	635-Std Array 1 well1	635-Log2 Array1 well1	635-Norm Array 1 well1 (w/in well)	635-Norm Array 1 well1 (w/in array)	635-spot1	635-spot2	635-spot3	635-Avg Total Signal Array1 well2	635-Std Array 1 well2	635-Log2 Array 1 well2	635-Norm Array 1 well2 (w/in well)	635-Norm Array 1 well2 (w/in array)	W2/W1	Log2 (W2/W1)	Norm w/in well W2/W1	Log2(Norm w/in well W2/W1)	Norm w/in array W2/W1	Log2(Norm w/in array W2/W1)		Block	Numbering	#	Sequence		Mod1	Mod2	Mod3	Mod4	Mod5
[truncated: 932 more rows]

[truncated: 5 more sheets: HATS, 10_116972_Sirtuins, 10_116974_Sirtuins, 10_116976_Sirtuins, Sirtuins]
